# Supplementary material for: Asymmetric dearomative reductive arylallylation of indoles with trifluoromethyl alkenes by nickel catalysis
Source: Royal Society of Chemistry journal article supplement (doi:10.1039/d3qo01460f), 2023-01-01

## Supplementary Information

### **Asymmetric Dearomative Reductive Arylallylation of Indoles with Trifluoromethyl Alkenes by Nickel Catalysis**

Xinmiao Huang, Xin Tan, Xu Zhang, Zhiyong Song, Ming Ma, Bo Chen, and Yuanhong Ma\*

Key Laboratory of Chemical Biology and Traditional Chinese Medicine Research (Ministry of Education), Key Laboratory of Phytochemistry R&D of Hunan Province, and Key Laboratory of the Assembly and Application of Organic Functional Molecules of Hunan Province, Institute of Interdisciplinary Studies, College of Chemistry and Chemical Engineering, Hunan Normal University, 410081 Changsha, P. R. China.

E-mail: mayh@hunnu.edu.cn

## Table of contents

|                                                                                                                                                         |     |
|---------------------------------------------------------------------------------------------------------------------------------------------------------|-----|
| 1. General Information .....                                                                                                                            | 3   |
| 2. Synthesis of Substrates .....                                                                                                                        | 4   |
| 2.1 Synthesis of <i>N</i> -(2-Bromobenzoyl)indoles.....                                                                                                 | 4   |
| 2.2 Synthesis of Trifluoromethyl Alkenes .....                                                                                                          | 4   |
| 3. Experimental Procedures .....                                                                                                                        | 5   |
| 3.1 General Procedure for Nickel-Catalyzed Dearomative Reductive<br>Arylallylation of Indoles with Trifluoromethyl Alkenes (racemic) .....              | 5   |
| 3.2 General Procedure for the Enantioselective Nickel-Catalyzed<br>Dearomative Reductive Arylallylation of Indoles with Trifluoromethyl<br>Alkenes..... | 6   |
| 4. Characterization Data and HPLC Spectra of Chiral Products .....                                                                                      | 7   |
| 5. Gram-Scale Synthesis and Further Derivatizations.....                                                                                                | 82  |
| 5.1 Gram-Scale Synthesis of Product <b>3</b> .....                                                                                                      | 82  |
| 5.2 Further Transformations of <b>3</b> .....                                                                                                           | 83  |
| 6. Mechanistic Studies .....                                                                                                                            | 89  |
| 6.1 Radical Capture Experiments.....                                                                                                                    | 89  |
| 6.2 Deuterium-Labeling Experiments.....                                                                                                                 | 92  |
| 6.3 The Profile of Reductant in Nickel-Catalyzed Dearomative Reductive<br>Coupling .....                                                                | 94  |
| 6.4 Kinetic Studies .....                                                                                                                               | 95  |
| 6.5 Hammett Plot of Different Substituents on Trifluoromethyl Alkenes....                                                                               | 96  |
| 7. X-ray Crystallographic Studies .....                                                                                                                 | 97  |
| 8. References .....                                                                                                                                     | 101 |
| 9. NMR Spectra .....                                                                                                                                    | 102 |

## 1. General Information

Unless otherwise stated, all manipulations were carried out under an atmosphere of nitrogen using standard Schlenk or glove box techniques. Anhydrous Toluene (Na), DMSO (CaH<sub>2</sub>), NMP (CaH<sub>2</sub>), DMF (CaH<sub>2</sub>) were distilled and transferred under nitrogen. Deuterated solvents were used as received (CDCl<sub>3</sub> from Adamas-beta, China). Unless otherwise noted, all reagents were obtained from commercial suppliers and used without further purification. Indole derivatives were synthesized according to literature<sup>1-2</sup>. Trifluoromethyl alkenes were synthesized according to literature<sup>3-8</sup>.

For chromatographic purification, 200-300 mesh silica gel (Leyan, China) was employed. For thin layer chromatography (TLC) analysis, High efficiency thin layer chromatography silica gel plates (HPTLC Silica Gel 60 GF254, 2.5\*5.0 cm) were used. <sup>1</sup>H-NMR and <sup>13</sup>C-NMR spectra were recorded at room temperature using a Bruker Avance-500 instruments. The <sup>1</sup>H NMR (500 MHz) chemical shifts were measured relative to tetramethylsilane as an internal standard (TMS:  $\delta = 0$  ppm). The <sup>13</sup>C NMR (126 MHz) chemical shifts were given using CDCl<sub>3</sub> as the internal standard (CDCl<sub>3</sub>:  $\delta = 77.16$  ppm). Gas chromatograph (GC) were performed using SHIMADZU Nexis GC-2030 coupled to a DM-5MS gas chromatography column. High-resolution mass spectra (HRMS) was performed using a 1290 Agilent HPLC system coupled to an Agilent quadrupole time of flight (QTQF, 6530) mass spectrometer and TOF MS ESI+ Mass spectrometer. X-Ray singlecrystal diffraction data was collected on a Bruker SMART APEX diffractometer. Optical rotation was measured on a WZZ-2B automatic polarimeter (Shanghai INESA, China). Enantiomeric excess was determined by a SHIMADZU Prominence LC-20A, using chiralpak AS-H column, chiralpak AD-H column or chiralpak ID column with hexane and *i*-PrOH as solvents.

## 2. Synthesis of Substrates

### 2.1 Synthesis of *N*-(2-Bromobenzoyl)indoles

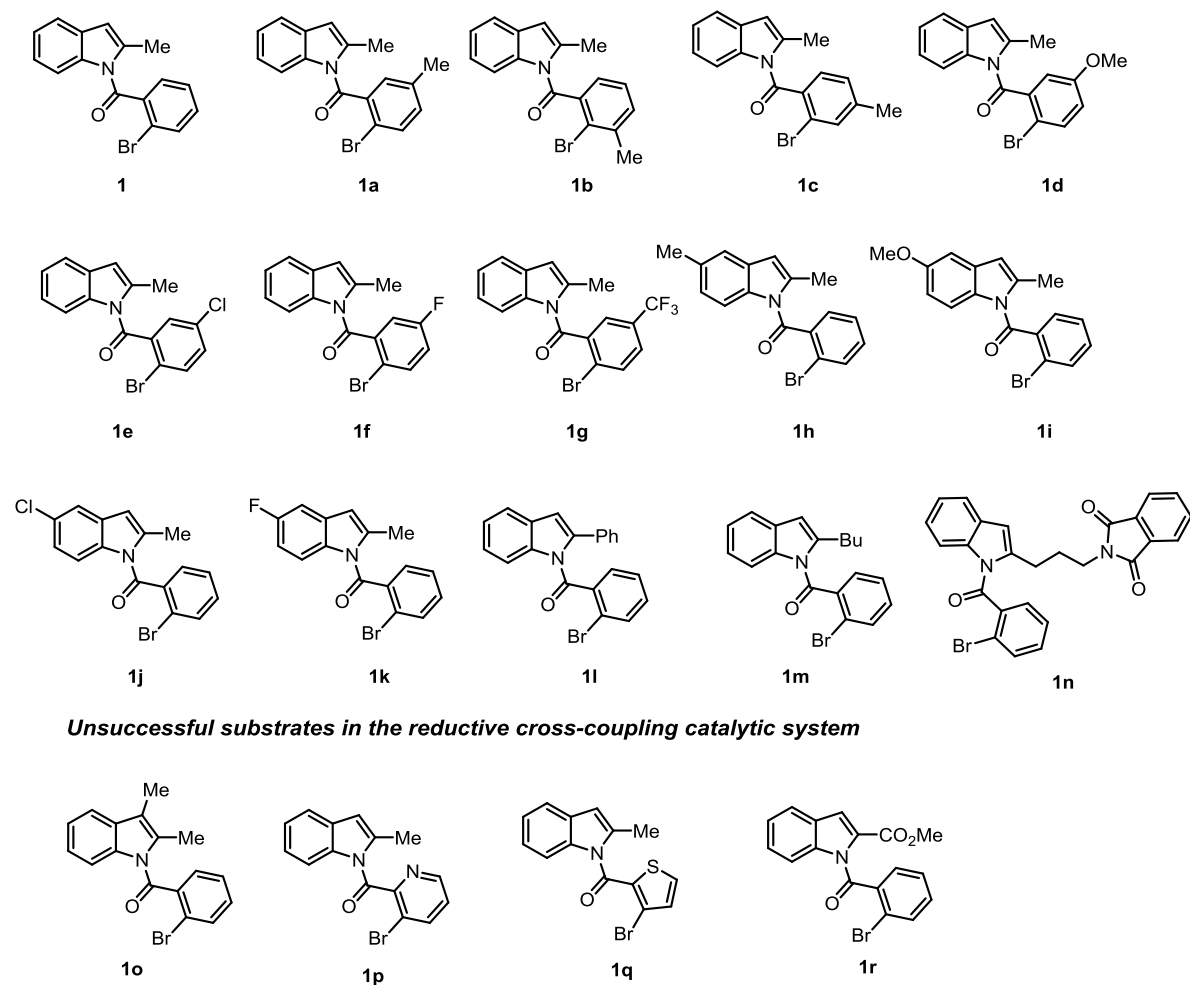

As shown above, substrates **1**<sup>1</sup>, **1a-l**<sup>1</sup>, **1n**<sup>1</sup>, **1o-r**<sup>1</sup> and **1m**<sup>2</sup> were prepared according to literature.

### 2.2 Synthesis of Trifluoromethyl Alkenes

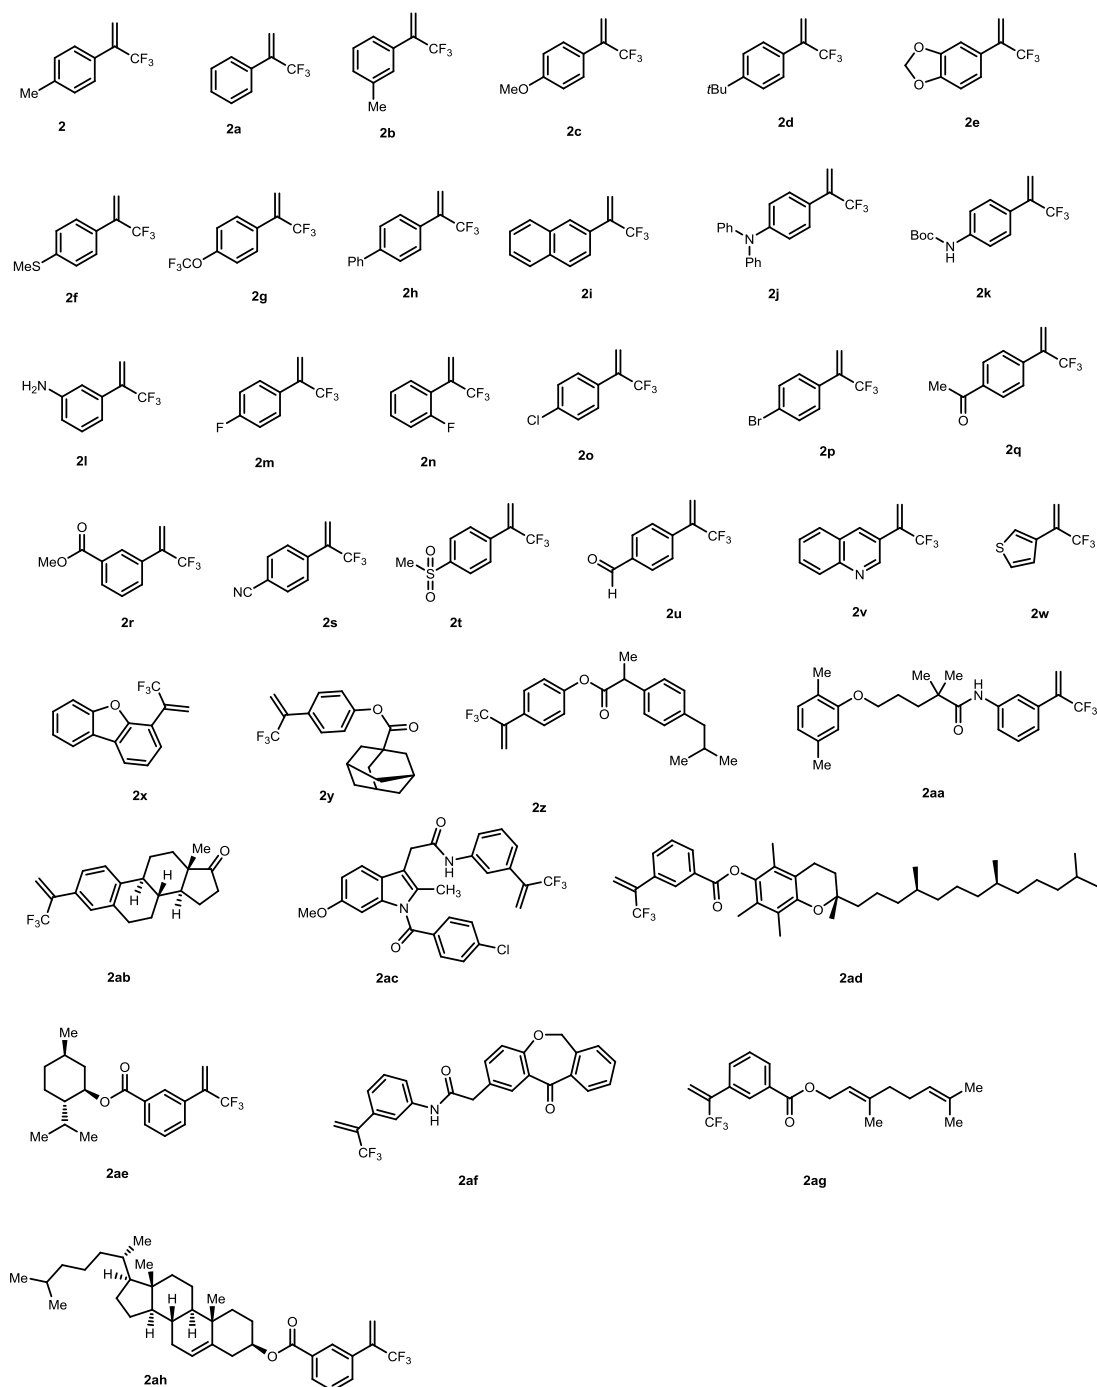

As shown above, compounds **2**<sup>3</sup>, **2a-b**<sup>4</sup>, **2c**<sup>3</sup>, **2e-j**<sup>3</sup>, **2k-p**<sup>4</sup>, **2q-u**<sup>3</sup>, **2v-x**<sup>4</sup>, **2y-z**<sup>3</sup>, **2aa-ac**<sup>4</sup>, **2ae**<sup>5</sup>, **2af**<sup>6</sup>, **2ag**<sup>7</sup> and **2ah**<sup>8</sup> were synthesized following the reported procedures.

### 3. Experimental Procedures

#### 3.1 General Procedure for Nickel-Catalyzed Dearomative Reductive Aryll allylation of Indoles with Trifluoromethyl Alkenes (racemic)

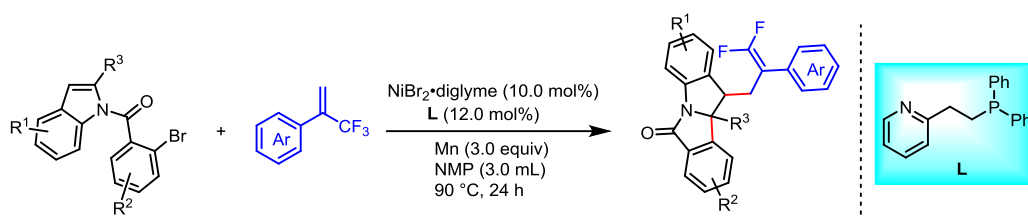

An oven-dried Schlenk tube (20.0 mL) was charged with  $\text{NiBr}_2 \cdot \text{diglyme}$  (0.02 mmol, 7.1 mg, 10.0 mol%), **L** (0.024 mmol, 6.6 mg, 12.0 mol%), Mn dust (0.6 mmol, 33.0 mg, 3.0 equiv), *N*-(2-bromobenzoyl)indoles (0.2 mmol, 1.0 equiv), trifluoromethyl alkenes (0.4 mmol, 2.0 equiv) and NMP (3.0 mL). The reaction mixture was allowed to stir under  $\text{N}_2$  atmosphere at 90 °C (oil bath) for 24 h. After this time, the tube was cooled to room temperature then the reaction mixture was vacuumed to remove the volatiles. The residue was diluted with DCM (~10 mL) and filtered through a triangular suction filter funnel with a thin layer of celite, and the filtrate was concentrated under vacuum. The crude mixture was then purified by column chromatography on silica gel (Petroleum ether/Ethyl acetate) to afford the desired products.

### 3.2 General Procedure for the Enantioselective Nickel-Catalyzed Dearomative Reductive Arylation of Indoles with Trifluoromethyl Alkenes

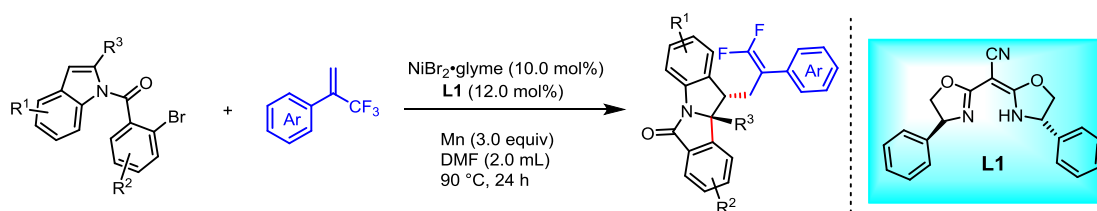

An oven-dried Schlenk tube (20.0 mL) was charged with  $\text{NiBr}_2 \cdot \text{glyme}$  (0.02 mmol, 6.2 mg, 10.0 mol%), **L1** (0.024 mmol, 8.0 mg, 12.0 mol%), Mn dust (0.6 mmol, 33.0 mg, 3.0 equiv), *N*-(2-bromobenzoyl)indoles (0.2 mmol, 1.0 equiv), trifluoromethyl alkenes (0.4 mmol, 2.0 equiv) and DMF (2.0 mL). The reaction mixture was allowed to stir under  $\text{N}_2$  atmosphere at 90 °C (oil bath) for 24 h. After this time, the tube was cooled to room temperature then the reaction mixture was vacuumed to remove the volatiles. The residue was diluted with DCM (~10 mL) and filtered through a triangular suction filter funnel with a thin layer of celite, and the filtrate was concentrated under vacuum. Subsequently, the ratio of dr was determined by crude  $^1\text{H}$  NMR. The crude mixture was then purified by column chromatography on silica gel (Petroleum ether/Ethyl acetate) to afford the desired products. Enantiomeric excess was determined by HPLC analysis with a chiral column.

## 4. Characterization Data and HPLC Spectra of Chiral Products

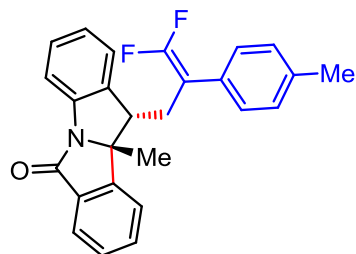

### (10*b**R*,11*S*)-11-(3,3-Difluoro-2-(*p*-tolyl)allyl)-10*b*-methyl-10*b*,11-dihydro-6*H*-isoindolo[2,1-*a*]indol-6-one, **3**

This compound was prepared according to the general procedure **3.2**. Purification by column chromatography on silica gel (Petroleum ether/Ethyl acetate = 7/1, v/v) afforded **3** as a yellow solid (53.3 mg, 0.133 mmol, 66% yield). **m.p.** 42.6 – 45.8 °C.

**<sup>1</sup>H NMR (500 MHz, CDCl<sub>3</sub>):** δ 7.94 (d, *J* = 7.5 Hz, 1H), 7.73 (d, *J* = 8.0 Hz, 1H), 7.68 (td, *J* = 7.5, 1.0 Hz, 1H), 7.55 (td, *J* = 7.5, 1.0 Hz, 1H), 7.50 (d, *J* = 7.5 Hz, 1H), 7.36 (td, *J* = 7.5, 1.0 Hz, 1H), 7.24 (d, *J* = 8.0 Hz, 2H), 7.20 – 7.17 (m, 3H), 7.10 (td, *J* = 7.5, 1.0 Hz, 1H), 3.06 (dd, *J* = 10.5, 4.5 Hz, 1H), 2.39 (s, 3H), 2.23 – 2.18 (m, 1H), 1.65 – 1.60 (m, 1H), 1.49 (s, 3H) ppm.

**<sup>13</sup>C NMR (126 MHz, CDCl<sub>3</sub>):** δ 167.3, 154.0 (dd, *J* = 291.8, 289.0 Hz), 147.8, 138.5, 137.7, 137.5, 133.8, 132.5, 129.73 (t, *J* = 3.7 Hz), 129.67, 129.0, 128.7, 128.0 (t, *J* = 3.3 Hz), 126.0, 125.1, 124.4, 123.0, 117.4, 88.7 (dd, *J* = 20.9, 14.2 Hz), 75.0, 47.2, 31.6, 27.0, 21.3 ppm.

**<sup>19</sup>F NMR (471 MHz, CDCl<sub>3</sub>):** δ -89.1 (d, *J* = 37.7 Hz), -90.1 (dd, *J* = 37.7, 4.7 Hz) ppm.

**HRMS (ESI<sup>+</sup>):** *m/z*: [M+H]<sup>+</sup> calcd for C<sub>26</sub>H<sub>22</sub>F<sub>2</sub>NO<sup>+</sup> 402.1664, found 402.1664.

[α]<sub>D</sub><sup>25</sup> = 104.0° (c = 0.50 in CHCl<sub>3</sub>). The enantiomeric excess was determined by HPLC: e.r. = 99.2:0.8 (Chiralpak AS-H, *i*-propanol/hexane = 1/99, flow rate 1.0 mL/min, λ = 254 nm); *t*<sub>major</sub> = 18.603 min, *t*<sub>minor</sub> = 15.900 min.

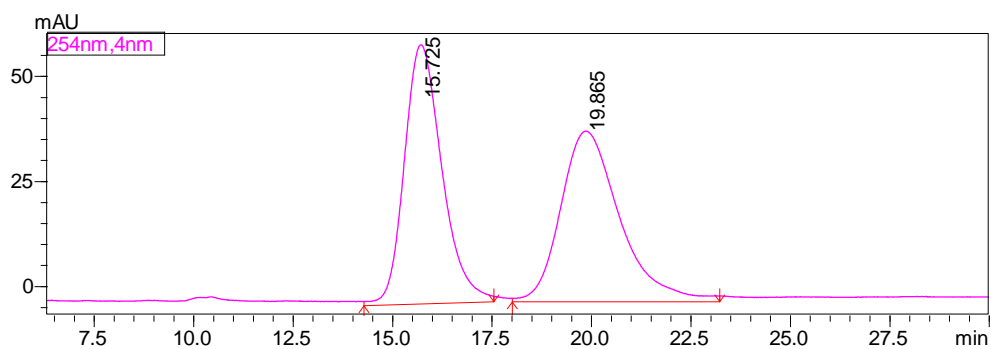

| Peak number | Retention time | Area    | Height | Area ratio |
|-------------|----------------|---------|--------|------------|
| 峰号          | 保留时间           | 面积      | 高度     | 面积%        |
| 1           | 15.725         | 4032780 | 61515  | 49.269     |
| 2           | 19.865         | 4152386 | 40433  | 50.731     |
| 总计          |                | 8185166 | 101948 | 100.000    |

Figure S1. HPLC chromatography of the racemic product 3

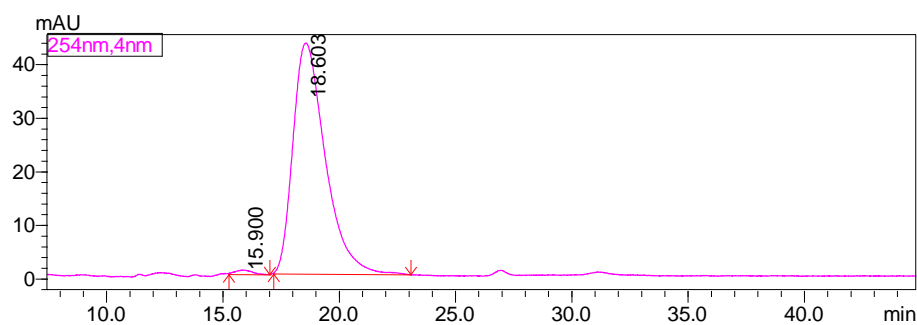

| Peak number | Retention time | Area    | Height | Area ratio |
|-------------|----------------|---------|--------|------------|
| 峰号          | 保留时间           | 面积      | 高度     | 面积%        |
| 1           | 15.900         | 33097   | 753    | 0.790      |
| 2           | 18.603         | 4157940 | 43205  | 99.210     |
| 总计          |                | 4191037 | 43957  | 100.000    |

Figure S2. HPLC chromatography of chiral product 3

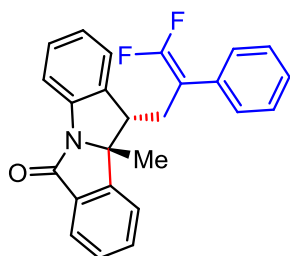

(10bR,11S)-11-(3,3-Difluoro-2-phenylallyl)-10b-methyl-10b,11-dihydro-6H-isoindolo[2,1-a]indol-6-one, 4



This compound was prepared according to the general procedure **3.2**. Purification by column chromatography on silica gel (Petroleum ether/Ethyl acetate = 7/1, v/v) afforded **4** as colorless oil (40.7 mg, 0.105 mmol, 53% yield).

**<sup>1</sup>H NMR (500 MHz, CDCl<sub>3</sub>):** δ 7.94 (d, *J* = 7.5 Hz, 1H), 7.73 (d, *J* = 7.5 Hz, 1H), 7.68 (t, *J* = 7.5 Hz, 1H), 7.55 (t, *J* = 7.5 Hz, 1H), 7.50 (d, *J* = 7.5 Hz, 1H), 7.42 (t, *J* = 7.5 Hz, 2H), 7.37 – 7.32 (m, 2H), 7.28 (d, *J* = 7.5 Hz, 2H), 7.17 (d, *J* = 7.5 Hz, 1H), 7.09 (t, *J* = 7.5 Hz, 1H), 3.07 (dd, *J* = 11.0, 5.0 Hz, 1H), 2.25 – 2.20 (m, 1H), 1.68 – 1.62 (m, 1H), 1.49 (s, 3H) ppm.

**<sup>13</sup>C NMR (126 MHz, CDCl<sub>3</sub>):** δ 167.3, 154.1 (dd, *J* = 292.4, 289.9 Hz), 147.8, 138.4, 137.8, 133.9, 132.9 (t, *J* = 3.9 Hz), 132.5, 129.05, 128.96, 128.7, 128.1 (t, *J* = 3.3 Hz), 127.7, 126.0, 125.1, 124.4, 123.0, 117.4, 89.0 (dd, *J* = 21.0, 14.0 Hz), 75.0, 47.3, 31.6, 27.0 ppm.

**<sup>19</sup>F NMR (471 MHz, CDCl<sub>3</sub>):** δ -88.5 (d, *J* = 36.3 Hz), -89.2 (d, *J* = 36.7 Hz) ppm.

**HRMS (ESI<sup>+</sup>):** *m/z*: [M+Na]<sup>+</sup> calcd for C<sub>25</sub>H<sub>19</sub>F<sub>2</sub>NNaO<sup>+</sup> 410.1327, found 410.1325.

[α]<sub>D</sub><sup>25</sup> = 118.0° (c = 0.40 in CHCl<sub>3</sub>). The enantiomeric excess was determined by HPLC: e.r. = 96.9:3.1 (Chiralpak AD-H, *i*-propanol/hexane = 5/95, flow rate 1.0 mL/min, λ = 254 nm); *t*<sub>major</sub> = 22.881 min, *t*<sub>minor</sub> = 14.386 min.

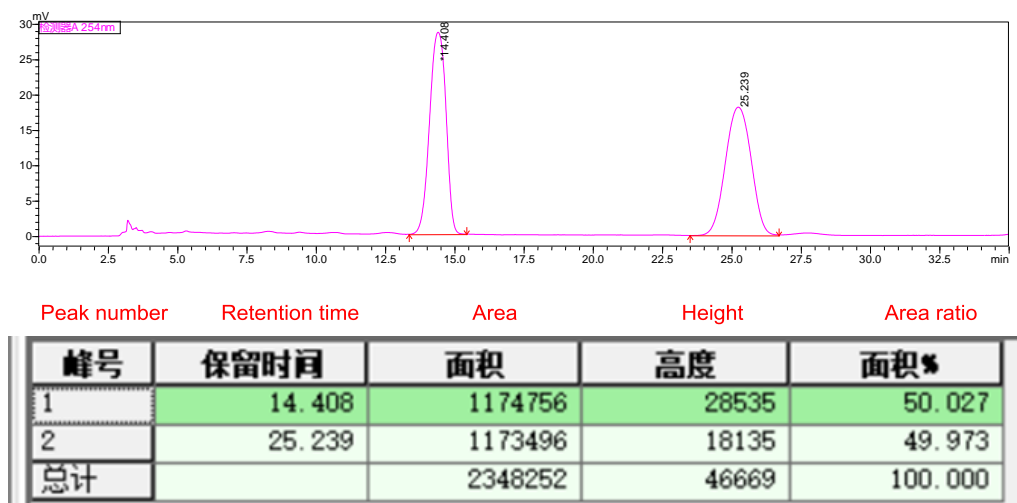

**Figure S3.** HPLC chromatography of the racemic product **4**

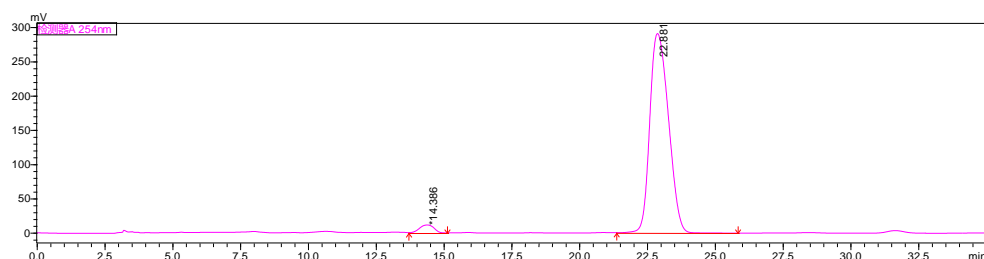

| Peak number | Retention time | Area     | Height | Area ratio |
|-------------|----------------|----------|--------|------------|
| 峰号          | 保留时间           | 面积       | 高度     | 面积%        |
| 1           | 14.386         | 451238   | 11789  | 3.127      |
| 2           | 22.881         | 13980699 | 291164 | 96.873     |
| 总计          |                | 14431938 | 302953 | 100.000    |

Figure S4. HPLC chromatography of chiral product 4

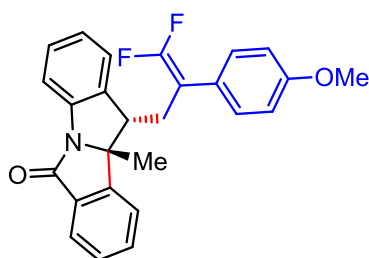

**(10bR,11S)-11-(3,3-Difluoro-2-(4-methoxyphenyl)allyl)-10b-methyl-10b,11-dihydro-6H-isoindolo[2,1-a]indol-6-one, 5**

This compound was prepared according to the general procedure 3.2. Purification by column chromatography on silica gel (Petroleum ether/Ethyl acetate = 6/1, v/v) afforded **5** as a white solid (41.6 mg, 0.100 mmol, 50% yield). **m.p.** 99.4 – 101.5 °C.

**<sup>1</sup>H NMR (500 MHz, CDCl<sub>3</sub>):** δ 7.94 (d, *J* = 7.5 Hz, 1H), 7.73 (d, *J* = 7.5 Hz, 1H), 7.67 (td, *J* = 7.5, 1.0 Hz, 1H), 7.55 (td, *J* = 7.5, 1.0 Hz, 1H), 7.50 (d, *J* = 7.5 Hz, 1H), 7.35 (td, *J* = 7.5, 1.0 Hz, 1H), 7.20 (d, *J* = 7.5 Hz, 2H), 7.17 (d, *J* = 7.5 Hz, 1H), 7.09 (td, *J* = 7.5, 1.0 Hz, 1H), 6.95 (d, *J* = 8.5 Hz, 2H), 3.84 (s, 3H), 3.07 (dd, *J* = 10.5, 5.0 Hz, 1H), 2.21 – 2.16 (m, 1H), 1.64 – 1.59 (m, 1H), 1.49 (s, 3H) ppm.

**<sup>13</sup>C NMR (126 MHz, CDCl<sub>3</sub>):** δ 167.3, 158.9, 153.9 (dd, *J* = 291.2, 289.0 Hz), 147.8, 138.5, 137.8, 133.8, 132.5, 129.2 (t, *J* = 3.4 Hz), 129.0, 128.7, 126.0, 125.1, 124.9 (t, *J* = 3.7 Hz), 124.4, 123.0, 117.4, 114.4, 88.4 (dd, *J* = 21.2, 14.5 Hz), 75.0, 55.4, 47.3, 31.7, 27.0 ppm.

**<sup>19</sup>F NMR (471 MHz, CDCl<sub>3</sub>):** δ -89.7 (d, *J* = 39.6 Hz), -90.7 (dd, *J* = 39.6, 4.2 Hz) ppm.

**HRMS (ESI<sup>+</sup>):** *m/z*: [M+H]<sup>+</sup> calcd for C<sub>26</sub>H<sub>22</sub>F<sub>2</sub>NO<sub>2</sub><sup>+</sup> 418.1613, found 418.1614.

[α]<sub>D</sub><sup>25</sup> = 264.0° (c = 0.50 in CHCl<sub>3</sub>). The enantiomeric excess was determined by HPLC: e.r. = 96.2:3.8 (Chiralpak AD-H, *i*-propanol/hexane = 10/90, flow rate 1.0 mL/min, λ = 254 nm); *t*<sub>major</sub> = 13.914 min, *t*<sub>minor</sub> = 10.289 min.

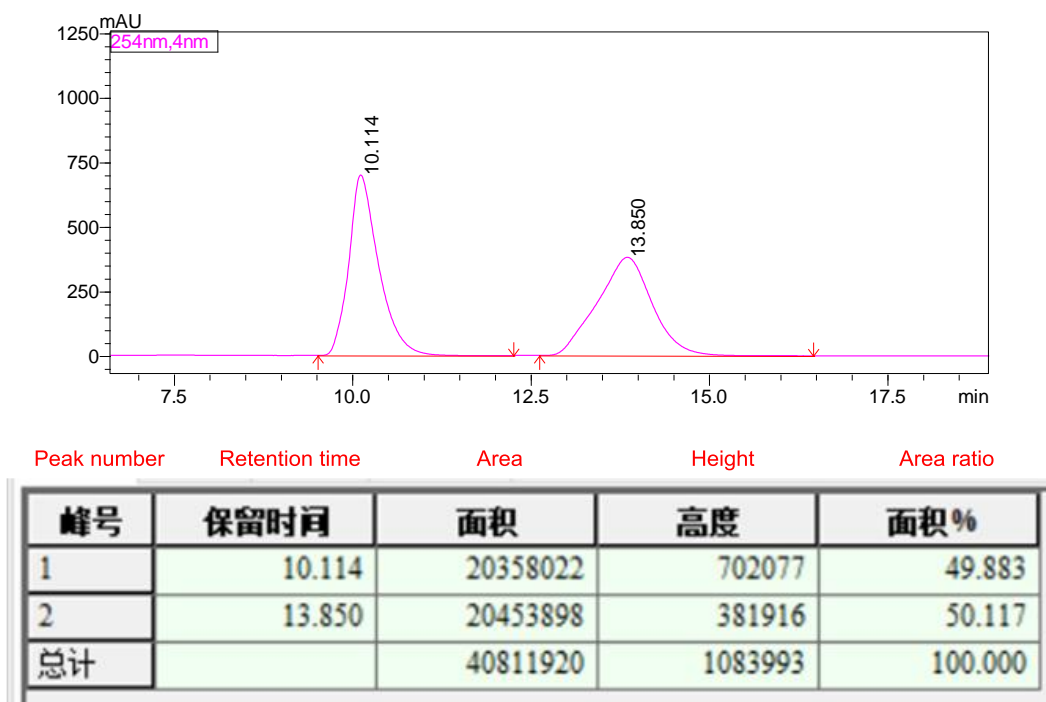

Figure S5. HPLC chromatography of the racemic product 5

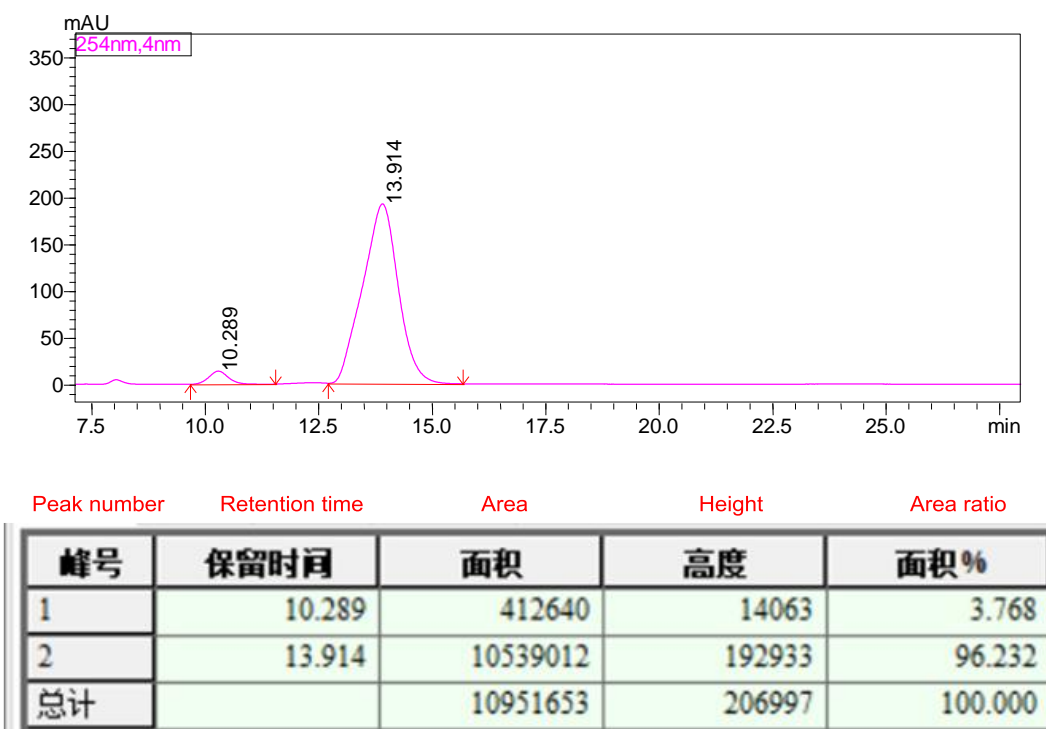

Figure S6. HPLC chromatography of chiral product 5

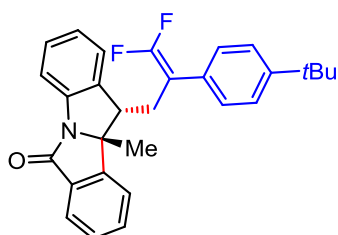

**(10b*R*,11*S*)-11-(2-(4-(*tert*-Butyl)phenyl)-3,3-difluoroallyl)-10b-methyl-10b,11-dihydro-6*H*-isoindolo[2,1-*a*]indol-6-one, 6**

This compound was prepared according to the general procedure 3.2. Purification by column chromatography on silica gel (Petroleum ether/Ethyl acetate = 7/1, v/v) afforded **6** as colorless oil (45.7 mg, 0.103 mmol, 52% yield).

**<sup>1</sup>H NMR (500 MHz, CDCl<sub>3</sub>):** δ 7.94 (d, *J* = 8.0 Hz, 1H), 7.73 (d, *J* = 8.0 Hz, 1H), 7.68 (td, *J* = 7.5, 1.5 Hz, 1H), 7.56–7.52 (m, 2H), 7.43 (d, *J* = 8.5 Hz, 2H), 7.35 (td, *J* = 7.5, 1.5 Hz, 1H), 7.21 (dd, *J* = 8.5, 1.5 Hz, 2H), 7.18 (d, *J* = 7.0 Hz, 1H), 7.09 (td, *J* = 7.5, 1.0 Hz, 1H), 3.10 (dd, *J* = 10.5, 5.0 Hz, 1H), 2.25–2.21 (m, 1H), 1.65–1.59 (m, 1H), 1.50 (s, 3H), 1.35 (s, 9H) ppm.

**<sup>13</sup>C NMR (126 MHz, CDCl<sub>3</sub>):** δ 167.3, 154.1 (dd, *J* = 292.7, 289.0 Hz), 150.6, 147.8, 138.5, 137.8, 133.9, 132.5, 129.7 (t, *J* = 3.9 Hz), 129.0, 128.7, 127.7 (t, *J* = 3.3 Hz), 126.1, 125.9, 125.1, 124.4, 123.1, 117.4, 88.7 (dd, *J* = 20.9, 14.0 Hz), 75.0, 47.3, 34.7, 31.5 (d, *J* = 1.9 Hz), 31.4, 27.0 ppm.

**<sup>19</sup>F NMR (471 MHz, CDCl<sub>3</sub>):** δ -88.8 (d, *J* = 37.7 Hz), -89.9 (dd, *J* = 37.7, 3.8 Hz) ppm.

**HRMS (ESI<sup>+</sup>):** *m/z*: [M+Na]<sup>+</sup> calcd for: C<sub>29</sub>H<sub>27</sub>F<sub>2</sub>NNaO<sup>+</sup> 466.1953, found 466.1953.

[α]<sub>D</sub><sup>25</sup> = 84.0° (c = 0.50 in CHCl<sub>3</sub>). The enantiomeric excess was determined by HPLC: e.r. = 97.1:2.9 (Chiralpak AD-H, *i*-propanol/hexane = 5/95, flow rate 1.0 mL/min, λ = 254 nm); *t*<sub>major</sub> = 13.732 min, *t*<sub>minor</sub> = 7.158 min.

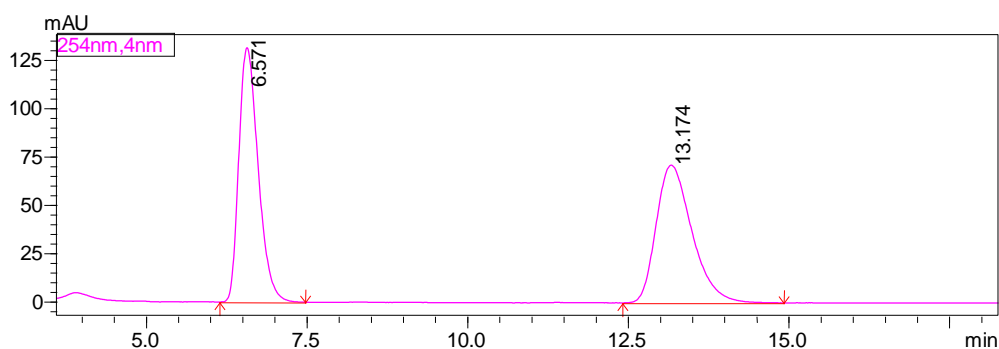

| Peak number | Retention time | Area    | Height | Area ratio |
|-------------|----------------|---------|--------|------------|
| 峰号          | 保留时间           | 面积      | 高度     | 面积%        |
| 1           | 6.571          | 2771086 | 132227 | 49.999     |
| 2           | 13.174         | 2771145 | 71648  | 50.001     |
| 总计          |                | 5542230 | 203875 | 100.000    |

**Figure S7.** HPLC chromatography of the racemic product **6**

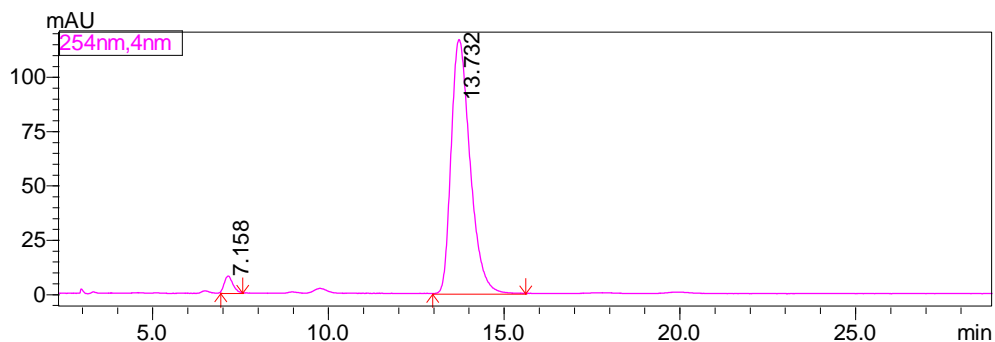

| Peak number | Retention time | Area    | Height | Area ratio |
|-------------|----------------|---------|--------|------------|
| 峰号          | 保留时间           | 面积      | 高度     | 面积%        |
| 1           | 7.158          | 131166  | 7797   | 2.910      |
| 2           | 13.732         | 4376714 | 117440 | 97.090     |
| 总计          |                | 4507880 | 125236 | 100.000    |

**Figure S8.** HPLC chromatography of chiral product **6**

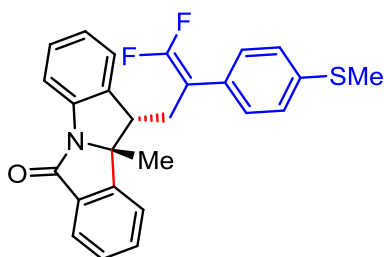

**(10bR,11S)-11-(3,3-Difluoro-2-(4-(methylthio)phenyl)allyl)-10b-methyl-10b,11-dihydro-6H-isoindolo[2,1-a]indol-6-one, 7**

This compound was prepared according to the general procedure **3.2**. Purification by column chromatography on silica gel (Petroleum ether/Ethyl acetate = 7/1, v/v) afforded **7** as a white solid (40.8 mg, 0.094 mmol, 47% yield). **m.p.** 120.1 – 122.5 °C.

**<sup>1</sup>H NMR (500 MHz, CDCl<sub>3</sub>):** δ 7.94 (d, *J* = 7.5 Hz, 1H), 7.73 (d, *J* = 7.5 Hz, 1H), 7.68 (td, *J* = 7.5, 1.0 Hz, 1H), 7.55 (td, *J* = 7.5, 1.0 Hz, 1H), 7.50 (d, *J* = 8.0 Hz, 1H), 7.35 (td, *J* = 7.5, 1.5 Hz, 1H), 7.28 (d, *J* = 8.5 Hz, 2H), 7.18 (dd, *J* = 8.5, 1.5 Hz, 2H), 7.15 (d, *J* = 7.5 Hz, 1H), 7.09 (td, *J* = 7.5, 1.0 Hz, 1H), 3.07 (dd, *J* = 10.5, 5.0 Hz, 1H), 2.52 (s, 3H), 2.23 – 2.17 (m, 1H), 1.65 – 1.59 (m, 1H), 1.50 (s, 3H) ppm.

**<sup>13</sup>C NMR (126 MHz, CDCl<sub>3</sub>):** δ 167.3, 154.1 (dd, *J* = 292.8, 289.8 Hz), 147.7, 138.4, 138.2, 137.8, 133.9, 132.5, 129.3 (t, *J* = 3.9 Hz), 129.1, 128.8, 128.4 (t, *J* = 3.3 Hz), 126.7, 125.9, 125.2, 124.4, 123.0, 117.4, 88.6 (dd, *J* = 21.5, 14.0 Hz), 75.0, 47.3, 31.5, 27.0, 15.6 ppm.

**<sup>19</sup>F NMR (471 MHz, CDCl<sub>3</sub>):** δ -88.4 (d, *J* = 36.3 Hz), -89.4 (dd, *J* = 36.7, 3.8 Hz)

ppm.

**HRMS (ESI<sup>+</sup>):**  $m/z$ :  $[M+Na]^+$  calcd for  $C_{26}H_{21}F_2NNaOS^+$  456.1204, found 456.1205.

$[\alpha]_D^{25} = 113.6^\circ$  ( $c = 0.50$  in  $CHCl_3$ ). The enantiomeric excess was determined by HPLC: e.r. = 97.2:2.8 (Chiralpak AD-H, *i*-propanol/hexane = 10/90, flow rate 1.0 mL/min,  $\lambda = 254$  nm);  $t_{major} = 24.142$  min,  $t_{minor} = 14.343$  min.

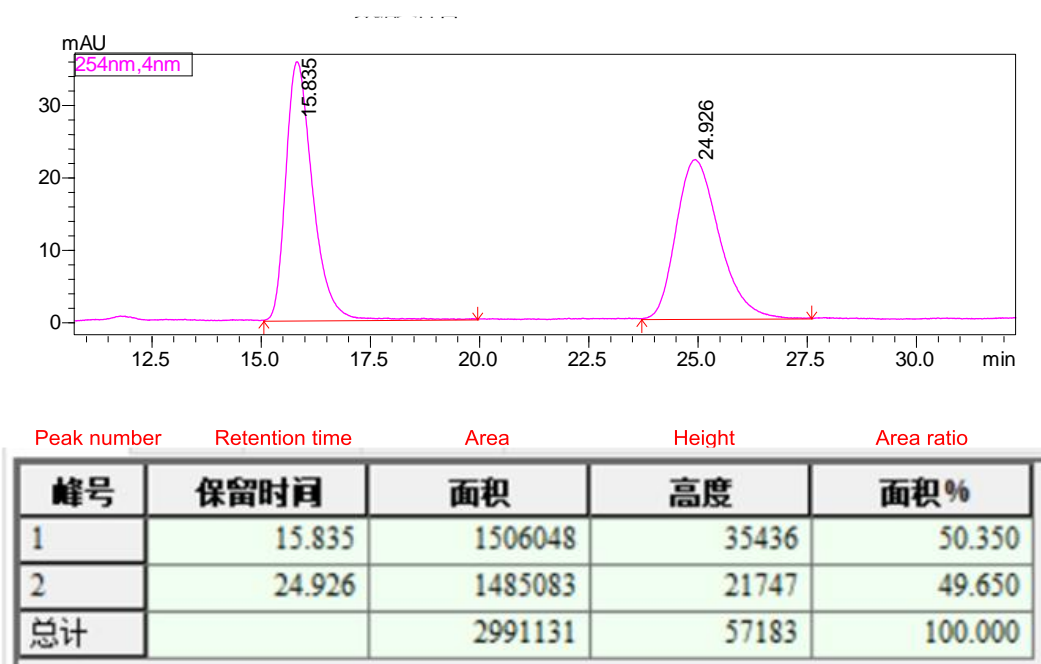

**Figure S9.** HPLC chromatography of the racemic product 7

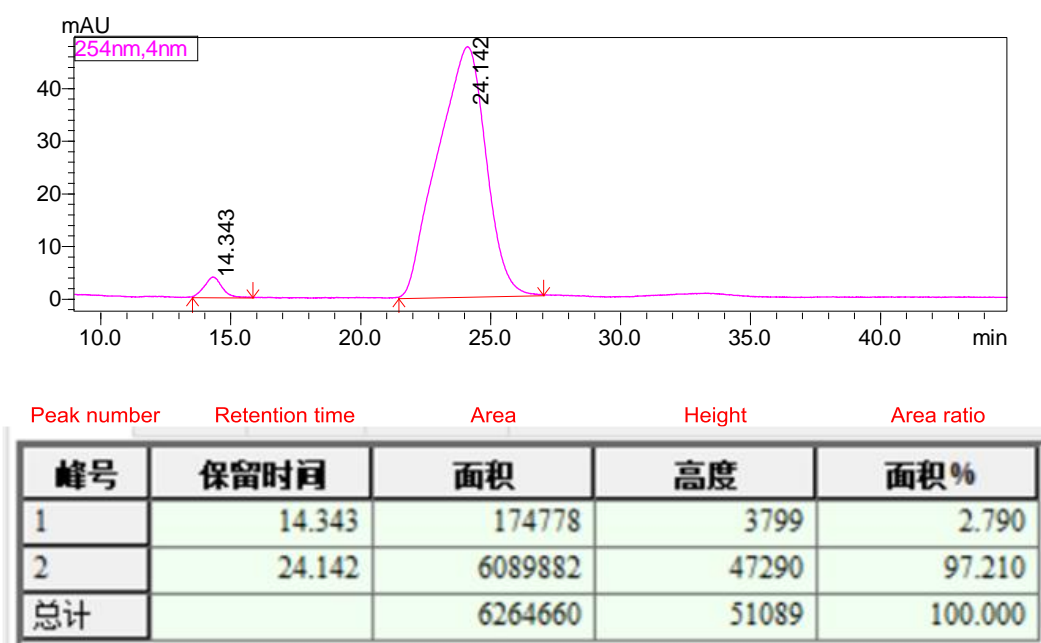

**Figure S10.** HPLC chromatography of chiral product 7

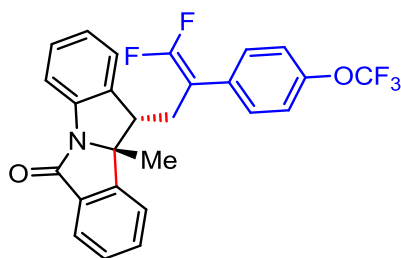

**(10bR,11S)-11-(3,3-Difluoro-2-(4-(trifluoromethoxy)phenyl)allyl)-10b-methyl-10b,11-dihydro-6H-isoindolo[2,1-a]indol-6-one, 8**

This compound was prepared according to the general procedure **3.2**. Purification by column chromatography on silica gel (Petroleum ether/Ethyl acetate = 7/1, v/v) afforded **8** as a white solid (66.3 mg, 0.141 mmol, 70% yield). **m.p.** 44.6 – 45.2 °C.

**<sup>1</sup>H NMR (500 MHz, CDCl<sub>3</sub>):** δ 7.94 (d, *J* = 7.5 Hz, 1H), 7.73 (d, *J* = 8.0 Hz, 1H), 7.68 (t, *J* = 7.0 Hz, 1H), 7.56 (t, *J* = 7.5 Hz, 1H), 7.51 (d, *J* = 7.5 Hz, 1H), 7.35 (t, *J* = 7.5 Hz, 1H), 7.23 (s, 4H), 7.13 (d, *J* = 7.5 Hz, 1H), 7.07 (t, *J* = 7.5 Hz, 1H), 3.09 (dd, *J* = 11.0, 5.0 Hz, 1H), 2.26 – 2.21 (m, 1H), 1.67 – 1.62 (m, 1H), 1.52 (s, 3H) ppm.

**<sup>13</sup>C NMR (126 MHz, CDCl<sub>3</sub>):** δ 167.2, 154.3 (dd, *J* = 293.3, 290.4 Hz), 148.3, 147.6, 138.1, 137.8, 133.9, 132.6, 131.6 (t, *J* = 4.0 Hz), 129.5 (t, *J* = 3.4 Hz), 129.1, 128.9, 126.0, 125.2, 124.4, 123.0, 121.6 (t, *J* = 257.9 Hz), 121.3, 120.5 (q, *J* = 257.9 Hz), 117.5, 88.3 (dd, *J* = 21.8, 13.5 Hz), 75.0, 47.5 (t, *J* = 2.5 Hz), 31.5, 27.0 ppm.

**<sup>19</sup>F NMR (471 MHz, CDCl<sub>3</sub>):** δ -57.8 (s), -87.4 (d, *J* = 34.9 Hz), -88.8 (dd, *J* = 35.8, 4.2 Hz) ppm.

**HRMS (ESI<sup>+</sup>):** *m/z*: [M+Na]<sup>+</sup> calcd for C<sub>26</sub>H<sub>18</sub>F<sub>5</sub>NNaO<sub>2</sub><sup>+</sup> 494.1150, found 494.1152.

[α]<sub>D</sub><sup>25</sup> = 220.0° (c = 0.50 in CHCl<sub>3</sub>). The enantiomeric excess was determined by HPLC: e.r. = 99.7:0.3 (Chiralpak AD-H, *i*-propanol/hexane = 5/95, flow rate 1.0 mL/min, λ = 254 nm); *t*<sub>major</sub> = 15.199 min, *t*<sub>minor</sub> = 11.609 min.

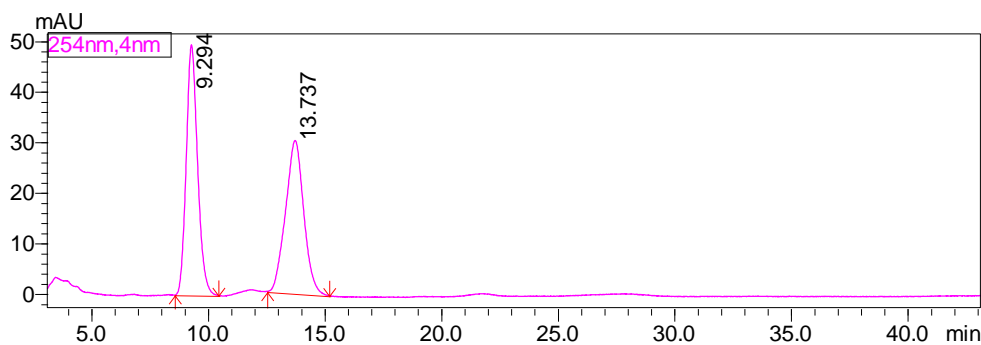

| Peak number | Retention time | Area    | Height | Area ratio |
|-------------|----------------|---------|--------|------------|
| 峰号          | 保留时间           | 面积      | 高度     | 面积%        |
| 1           | 9.294          | 1685460 | 49745  | 50.489     |
| 2           | 13.737         | 1652835 | 30454  | 49.511     |
| 总计          |                | 3338295 | 80199  | 100.000    |

Figure S11. HPLC chromatography of the racemic product **8**

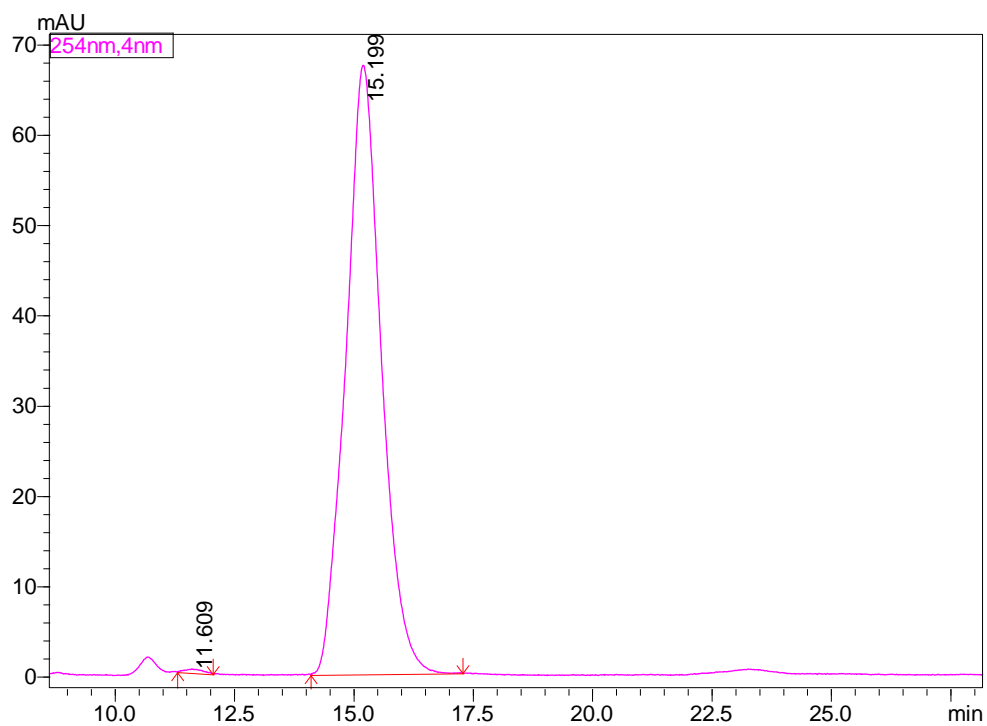

| Peak number | Retention time | Area    | Height | Area ratio |
|-------------|----------------|---------|--------|------------|
| 峰号          | 保留时间           | 面积      | 高度     | 面积%        |
| 1           | 11.609         | 10984   | 421    | 0.313      |
| 2           | 15.199         | 3496496 | 67699  | 99.687     |
| 总计          |                | 3507481 | 68119  | 100.000    |

Figure S12. HPLC chromatography of chiral product **8**

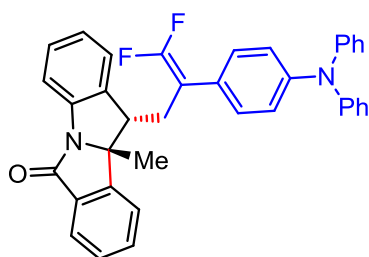



**(10bR,11R)-11-(2-(4-(Diphenylamino)phenyl)-3,3-difluoroallyl)-10b-methyl-10b,11-dihydro-6H-isoindolo[2,1-a]indol-6-one, 9**

This compound was prepared according to the general procedure 3.2. Purification by column chromatography on silica gel (Petroleum ether/Ethyl acetate = 6/1, v/v) afforded **9** as a white solid (67.6 mg, 0.122 mmol, 61% yield). **m.p.** 74.6 – 75.9 °C.

**<sup>1</sup>H NMR (500 MHz, CDCl<sub>3</sub>):** δ 7.93 (d, *J* = 7.5 Hz, 1H), 7.73 (d, *J* = 7.5 Hz, 1H), 7.65 (t, *J* = 7.5 Hz, 1H), 7.55 – 7.50 (m, 2H), 7.34 (t, *J* = 7.5 Hz, 1H), 7.28 (t, *J* = 7.5 Hz, 4H), 7.17 (d, *J* = 7.5 Hz, 1H), 7.13 (d, *J* = 8.0 Hz, 4H), 7.10 – 7.04 (m, 7H), 3.16 (dd, *J* = 11.0, 5.0 Hz, 1H), 2.23 – 2.18 (m, 1H), 1.62 – 1.57 (m, 1H), 1.53 (s, 3H) ppm.

**<sup>13</sup>C NMR (126 MHz, CDCl<sub>3</sub>):** δ 167.3, 154.1 (dd, *J* = 292.4, 289.3 Hz), 147.8, 147.4, 147.1, 138.4, 137.8, 133.8, 132.5, 129.5, 129.0, 128.7, 128.6 (t, *J* = 3.7 Hz), 126.1, 125.9 (t, *J* = 3.7 Hz), 125.1, 124.9, 124.3, 123.4, 123.0, 122.9, 117.4, 88.6 (dd, *J* = 21.2, 13.9 Hz), 75.0, 47.5, 31.4, 27.0 ppm.

**<sup>19</sup>F NMR (471 MHz, CDCl<sub>3</sub>):** δ -88.8 (d, *J* = 38.2 Hz), -89.8 (dd, *J* = 38.2, 4.2 Hz) ppm.

**HRMS (ESI<sup>+</sup>):** *m/z*: [M+H]<sup>+</sup> calcd for :C<sub>37</sub>H<sub>29</sub>F<sub>2</sub>N<sub>2</sub>O<sup>+</sup> 555.2242, found 555.2242.

[α]<sub>D</sub><sup>25</sup> = 32.0° (c = 0.50 in CHCl<sub>3</sub>). The enantiomeric excess was determined by HPLC: e.r. = 96.9:3.1 (Chiralpak AD-H, *i*-propanol/hexane = 5/95, flow rate 1.0 mL/min, λ = 254 nm); *t*<sub>major</sub> = 35.177 min, *t*<sub>minor</sub> = 9.808 min.

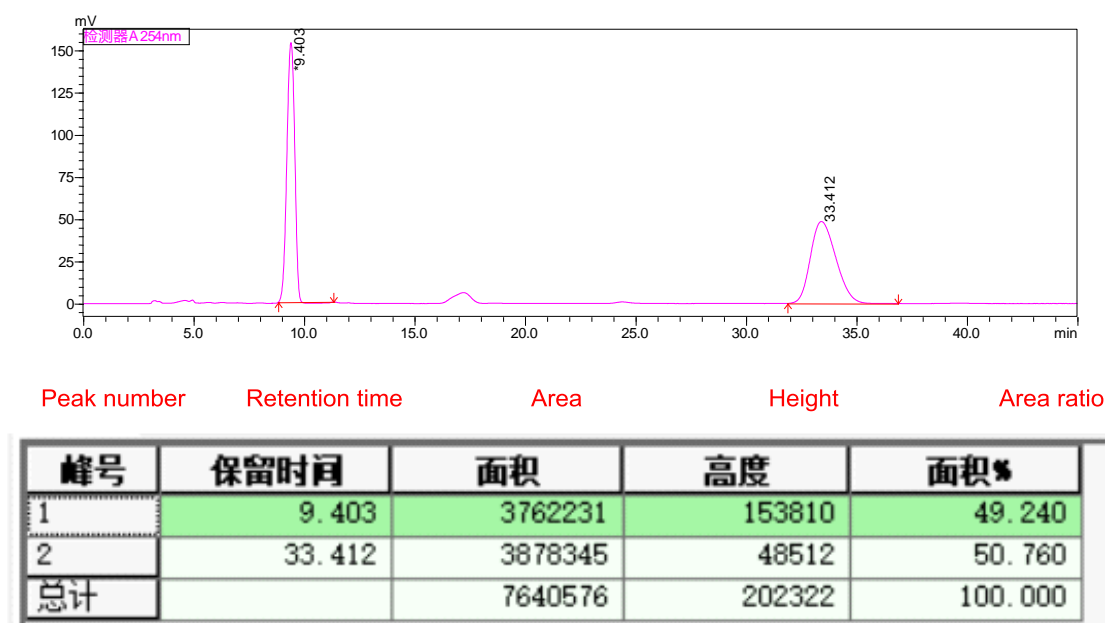

**Figure S13.** HPLC chromatography of the racemic product **9**

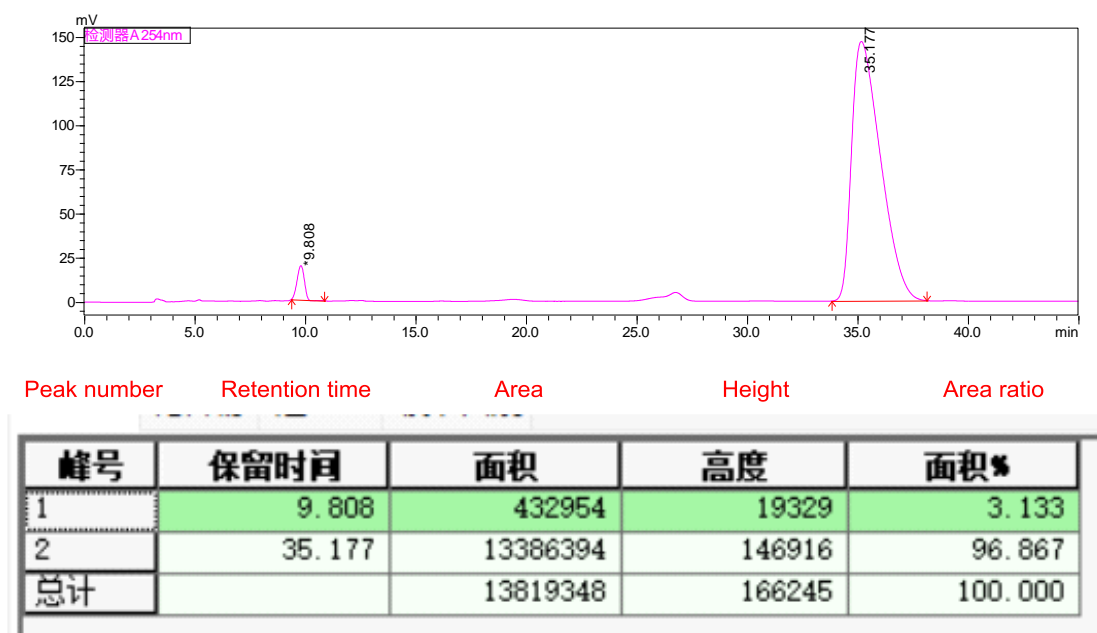

Figure S14. HPLC chromatography of chiral product 9

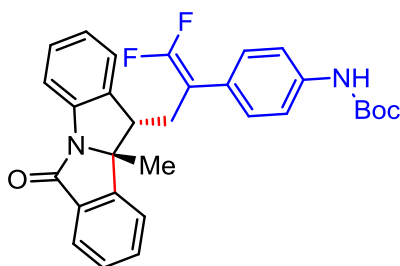

***tert*-Butyl (4-(1,1-difluoro-3-((10*b**R*,11*S*)-10*b*-methyl-6-oxo-10*b*,11-dihydro-6*H*-isoindolo[2,1-*a*]indol-11-yl)prop-1-en-2-yl)phenyl)carbamate, 10**

This compound was prepared according to the general procedure 3.2. Purification by column chromatography on silica gel (Petroleum ether/Ethyl acetate = 5/1, v/v) afforded 10 as a white solid (43.9 mg, 0.087 mmol, 44% yield). **m.p.** 42.5 – 44.2 °C.

**<sup>1</sup>H NMR (500 MHz, CDCl<sub>3</sub>):** δ 7.94 (d, *J* = 7.5 Hz, 1H), 7.73 (d, *J* = 8.0 Hz, 1H), 7.68 (td, *J* = 7.5, 1.5 Hz, 1H), 7.55 (t, *J* = 7.5 Hz, 1H), 7.49 (d, *J* = 8.0 Hz, 1H), 7.45 (d, *J* = 8.5 Hz, 2H), 7.35 (td, *J* = 7.5, 1.5 Hz, 1H), 7.22 (d, *J* = 7.5 Hz, 2H), 7.15 (d, *J* = 6.0 Hz, 1H), 7.09 (td, *J* = 7.5, 1.0 Hz, 1H), 6.70 (s, 1H), 3.04 (dd, *J* = 11.0, 5.0 Hz, 1H), 2.21 – 2.15 (m, 1H), 1.65 – 1.59 (m, 1H), 1.54 (s, 9H), 1.48 (s, 3H) ppm.

**<sup>13</sup>C NMR (126 MHz, CDCl<sub>3</sub>):** δ 167.3, 154.0 (dd, *J* = 291.7, 289.2 Hz), 152.9, 147.8, 138.5, 137.81, 137.75, 133.8, 132.5, 129.0, 128.73 (t, *J* = 3.3 Hz), 128.71, 127.2 (t, *J* = 4.0 Hz), 125.9, 125.1, 124.5, 123.0, 118.9, 117.4, 88.5 (dd, *J* = 21.3, 14.1 Hz), 81.0, 75.0, 47.2, 31.5, 28.4, 27.0 ppm.

$^{19}\text{F}$  NMR (471 MHz,  $\text{CDCl}_3$ ):  $\delta$  -89.1 (d,  $J = 38.2$  Hz), -90.1 (d,  $J = 38.2$  Hz) ppm.

HRMS (ESI $^+$ ):  $m/z$ :  $[\text{M}+\text{Na}]^+$  calcd for  $\text{C}_{30}\text{H}_{28}\text{F}_2\text{N}_2\text{NaO}_3^+$  525.1960, found 525.1960.

$[\alpha]_D^{25} = 82.4^\circ$  ( $c = 0.50$  in  $\text{CHCl}_3$ ). The enantiomeric excess was determined by HPLC: e.r. = 97.1:2.9 (Chiralpak AD-H, *i*-propanol/hexane = 30/70, flow rate 1.0 mL/min,  $\lambda = 254$  nm);  $t_{\text{major}} = 10.669$  min,  $t_{\text{minor}} = 8.487$  min.

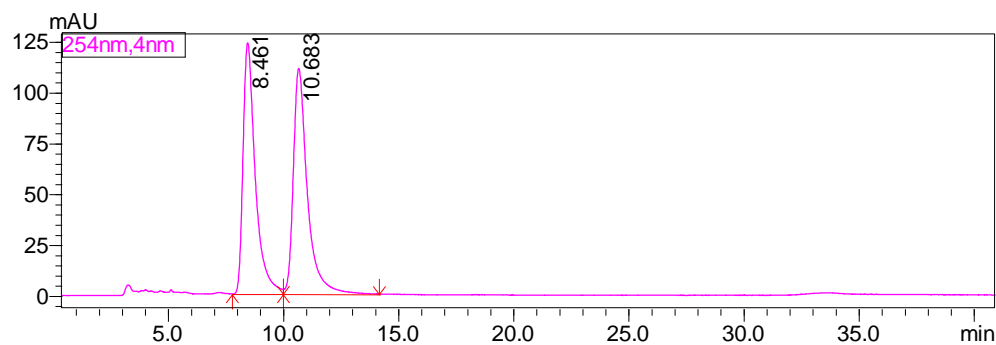

| Peak number | Retention time | Area    | Height | Area ratio |
|-------------|----------------|---------|--------|------------|
| 峰号          | 保留时间           | 面积      | 高度     | 面积%        |
| 1           | 8.461          | 4571992 | 123573 | 49.294     |
| 2           | 10.683         | 4702978 | 110993 | 50.706     |
| 总计          |                | 9274970 | 234566 | 100.000    |

Figure S15. HPLC chromatography of the racemic product 10

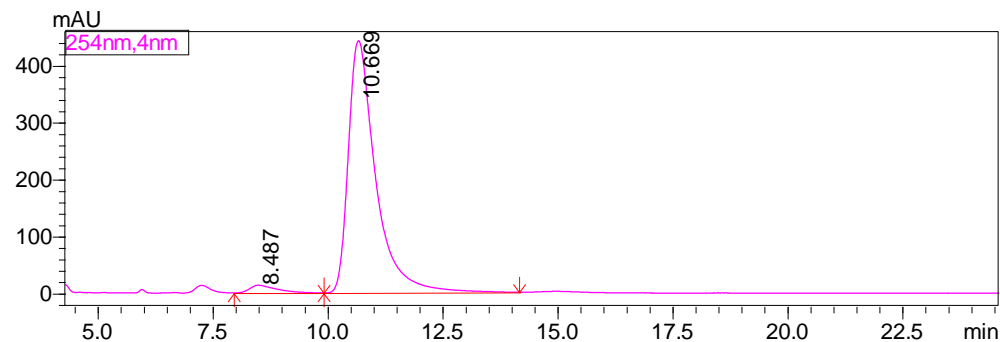

| Peak number | Retention time | Area     | Height | Area ratio |
|-------------|----------------|----------|--------|------------|
| 峰号          | 保留时间           | 面积       | 高度     | 面积%        |
| 1           | 8.487          | 539797   | 13531  | 2.863      |
| 2           | 10.669         | 18316631 | 442516 | 97.137     |
| 总计          |                | 18856427 | 456047 | 100.000    |

Figure S16. HPLC chromatography of chiral product 10

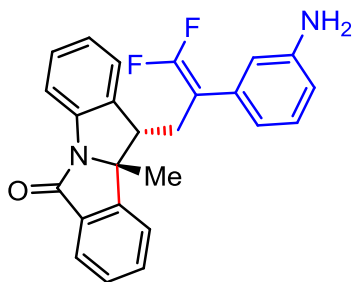

**(10bR,11S)-11-(2-(3-Aminophenyl)-3,3-difluoroallyl)-10b-methyl-10b,11-dihydro-6H-isoindolo[2,1-a]indol-6-one, 11**

This compound was prepared according to the general procedure **3.2**. Purification by column chromatography on silica gel (Petroleum ether/Ethyl acetate = 5/1 to 2/1, v/v) afforded **11** as a white solid (27.0 mg, 0.067 mmol, 34% yield). **m.p.** 58.0 – 58.8 °C.

**<sup>1</sup>H NMR (500 MHz, CDCl<sub>3</sub>):** δ 7.94 (d, *J* = 7.5 Hz, 1H), 7.73 (d, *J* = 8.0 Hz, 1H), 7.67 (t, *J* = 7.0 Hz, 1H), 7.55 (t, *J* = 7.5 Hz, 1H), 7.50 (d, *J* = 7.5 Hz, 1H), 7.36 (td, *J* = 7.5, 1.5 Hz, 1H), 7.21 – 7.18 (m, 2H), 7.10 (t, *J* = 7.0 Hz, 1H), 6.66 (dd, *J* = 14.0, 7.5 Hz, 2H), 6.57 (s, 1H), 3.67 (br, 2H), 3.10 (dd, *J* = 10.5, 5.0 Hz, 1H), 2.19 – 2.14 (m, 1H), 1.63 – 1.57 (m, 1H), 1.50 (s, 3H) ppm.

**<sup>13</sup>C NMR (126 MHz, CDCl<sub>3</sub>):** δ 167.3, 154.0 (dd, *J* = 292.7, 289.5 Hz), 147.8, 146.9, 138.6, 137.8, 133.93 (t, *J* = 3.5 Hz), 133.87, 132.5, 129.8, 129.0, 128.7, 126.1, 125.1, 124.4, 123.1, 118.2 (t, *J* = 2.6 Hz), 117.4, 114.8 (t, *J* = 3.5 Hz), 114.5, 89.0 (dd, *J* = 20.9, 13.6 Hz), 75.0, 47.3, 31.7, 27.0 ppm.

**<sup>19</sup>F NMR (471 MHz, CDCl<sub>3</sub>):** δ -88.8 (d, *J* = 36.7 Hz), -89.2 (d, *J* = 36.7 Hz) ppm.

**HRMS (ESI<sup>+</sup>):** *m/z*: [M+H]<sup>+</sup> calcd for C<sub>25</sub>H<sub>21</sub>F<sub>2</sub>N<sub>2</sub>O<sup>+</sup> 403.1616, found 403.1617.

[α]<sub>D</sub><sup>25</sup> = 109.6° (c = 0.50 in CHCl<sub>3</sub>). The enantiomeric excess was determined by HPLC: e.r. = 84.8:15.2 (Chiralpak AD-H, *i*-propanol/hexane = 20/80, flow rate 1.0 mL/min, λ = 254 nm); *t*<sub>major</sub> = 14.468 min, *t*<sub>minor</sub> = 13.466 min.

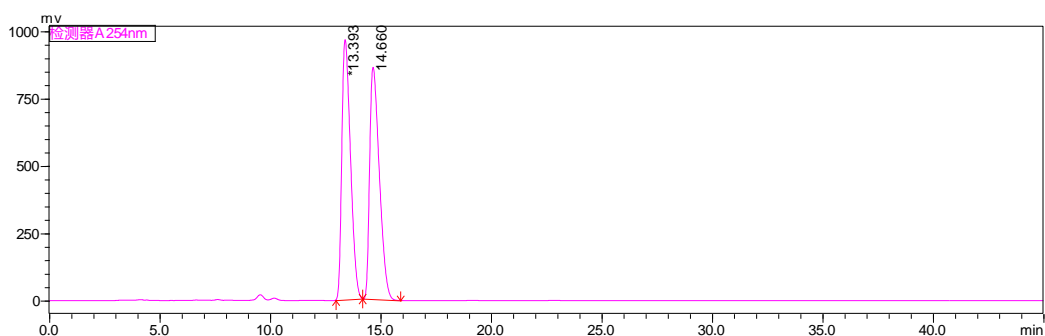

Peak number      Retention time      Area      Height      Area ratio

| 峰号 | 保留时间   | 面积       | 高度      | 面积%     |
|----|--------|----------|---------|---------|
| 1  | 13.393 | 26288775 | 965260  | 50.045  |
| 2  | 14.660 | 26241574 | 860567  | 49.955  |
| 总计 |        | 52530348 | 1825826 | 100.000 |

Figure S17. HPLC chromatography of the racemic product **11**

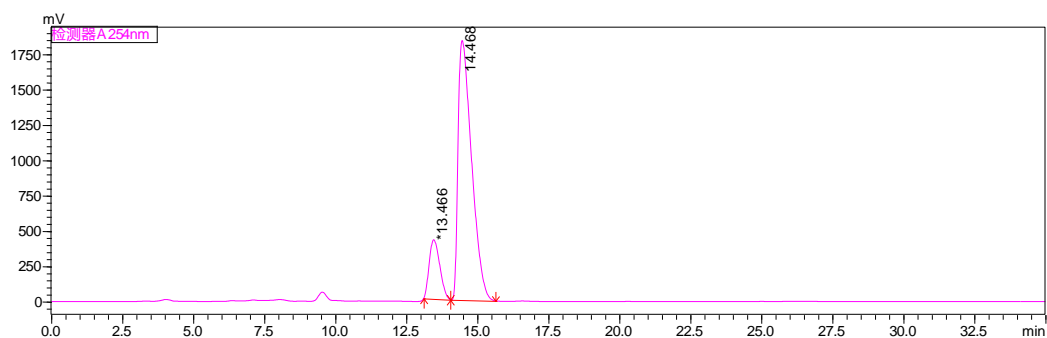

Peak number      Retention time      Area      Height      Area ratio

| 峰号 | 保留时间   | 面积       | 高度      | 面积%     |
|----|--------|----------|---------|---------|
| 1  | 13.466 | 10889111 | 419062  | 15.163  |
| 2  | 14.468 | 60923437 | 1836778 | 84.837  |
| 总计 |        | 71812549 | 2255839 | 100.000 |

Figure S18. HPLC chromatography of chiral product **11**

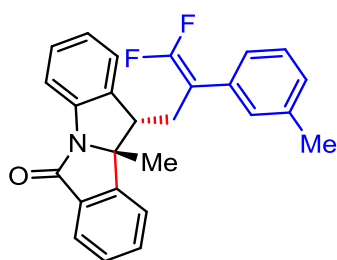

**(10bR,11S)-11-(3,3-Difluoro-2-(*m*-tolyl)allyl)-10b-methyl-10b,11-dihydro-6H-isoindolo[2,1-*a*]indol-6-one, **12****

This compound was prepared according to the general procedure **3.2**. Purification by column chromatography on silica gel (Petroleum ether/Ethyl acetate = 7/1, v/v) afforded **12** as yellow oil (35.0 mg, 0.087 mmol, 44% yield).

$^1\text{H NMR}$  (500 MHz,  $\text{CDCl}_3$ ):  $\delta$  7.94 (d,  $J = 7.5$  Hz, 1H), 7.74 (d,  $J = 8.0$  Hz, 1H), 7.68 (td,  $J = 7.5, 1.0$  Hz, 1H), 7.55 (td,  $J = 7.5, 1.0$  Hz, 1H), 7.50 (d,  $J = 7.5$  Hz, 1H), 7.36 (td,  $J = 8.0, 1.5$  Hz, 1H), 7.31 (t,  $J = 7.5$  Hz, 1H), 7.19 (d,  $J = 8.0$  Hz, 1H), 7.13 (d,  $J =$

8.0 Hz, 1H), 7.12 – 7.05 (m, 3H), 3.07 (dd,  $J = 11.0, 5.0$  Hz, 1H), 2.40 (s, 3H), 2.23 – 2.18 (m, 1H), 1.66 – 1.61 (m, 1H), 1.50 (s, 3H) ppm.

$^{13}\text{C}$  NMR (126 MHz,  $\text{CDCl}_3$ ):  $\delta$  167.3, 154.1 (dd,  $J = 292.4, 289.5$  Hz), 147.8, 138.6, 138.5, 137.8, 133.9, 132.8 (t,  $J = 3.8$  Hz), 132.5, 129.0, 128.9 (t,  $J = 3.3$  Hz), 128.8, 128.7, 128.5, 126.0, 125.14, 125.12, 124.4, 123.0, 117.4, 89.0 (dd,  $J = 20.8, 14.1$  Hz), 75.0, 47.4 (t,  $J = 2.4$  Hz), 31.7 (d,  $J = 1.9$  Hz), 27.0, 21.7 ppm.

$^{19}\text{F}$  NMR (471 MHz,  $\text{CDCl}_3$ ):  $\delta$  -88.7 (d,  $J = 37.2$  Hz), -89.7 (dd,  $J = 37.2, 4.2$  Hz) ppm.

HRMS (ESI<sup>+</sup>):  $m/z$ :  $[\text{M}+\text{Na}]^+$  calcd for  $\text{C}_{26}\text{H}_{21}\text{F}_2\text{NNaO}^+$  424.1483, found 424.1484.

$[\alpha]_D^{25} = 48.0^\circ$  ( $c = 0.50$  in  $\text{CHCl}_3$ ). The enantiomeric excess was determined by HPLC: e.r. = 95.2:4.8 (Chiralpak AD-H, *i*-propanol/hexane = 5/95, flow rate 1.0 mL/min,  $\lambda = 254$  nm);  $t_{\text{major}} = 10.508$  min,  $t_{\text{minor}} = 8.809$  min.

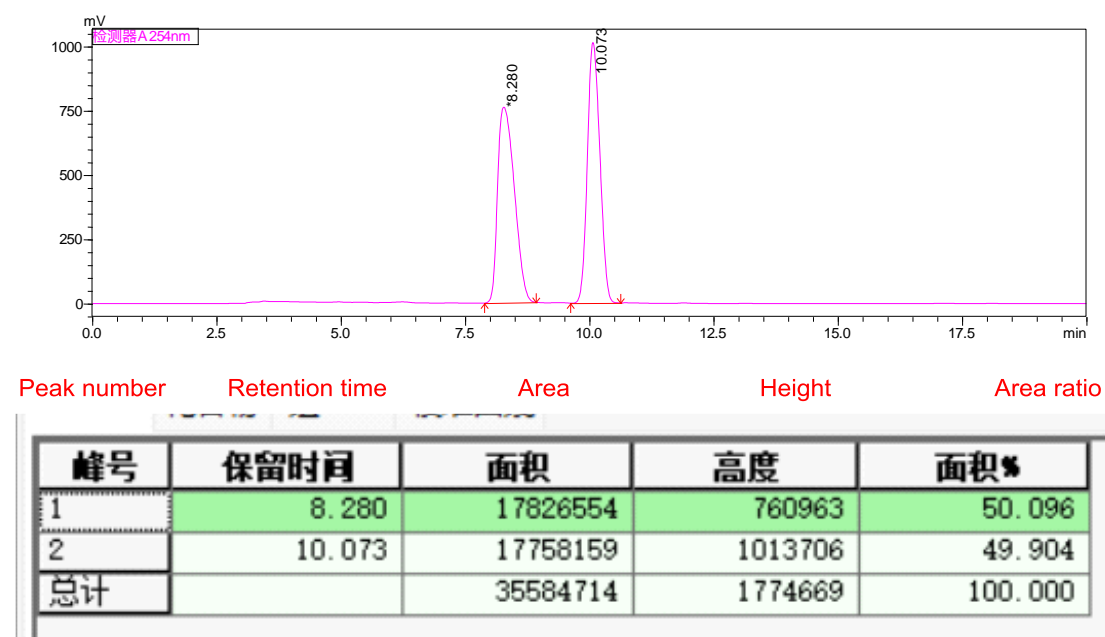

Figure S19. HPLC chromatography of the racemic product 12

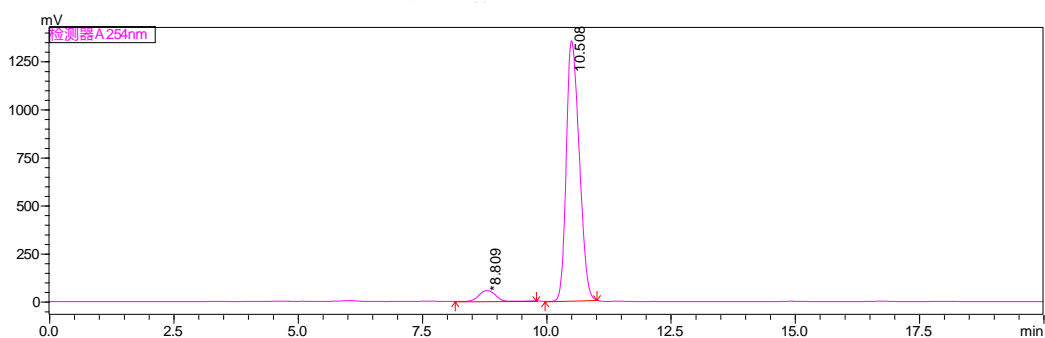

| Peak number | Retention time | Area     | Height  | Area ratio |
|-------------|----------------|----------|---------|------------|
| 峰号          | 保留时间           | 面积       | 高度      | 面积%        |
| 1           | 8.809          | 1224087  | 54978   | 4.767      |
| 2           | 10.508         | 24455326 | 1352078 | 95.233     |
| 总计          |                | 25679413 | 1407056 | 100.000    |

Figure S20. HPLC chromatography of chiral product 12

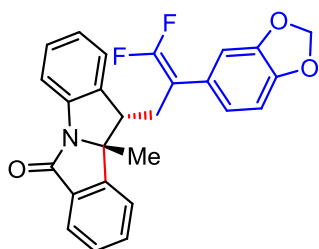

**(10bR,11S)-11-(2-(Benzo[*d*][1,3]dioxol-5-yl)-3,3-difluoroallyl)-10b-methyl-10b,11-dihydro-6H-isoindolo[2,1-*a*]indol-6-one, 13**

This compound was prepared according to the general procedure 3.2. Purification by column chromatography on silica gel (Petroleum ether/Ethyl acetate = 5/1, v/v) afforded **13** as a yellow solid (37.8 mg, 0.088 mmol, 44% yield). **m.p.** 45.3 – 46.0 °C.

**<sup>1</sup>H NMR (500 MHz, CDCl<sub>3</sub>):** δ 7.94 (d, *J* = 7.5 Hz, 1H), 7.73 (d, *J* = 7.5 Hz, 1H), 7.68 (td, *J* = 7.5, 1.0 Hz, 1H), 7.55 (td, *J* = 7.5, 1.0 Hz, 1H), 7.50 (d, *J* = 7.5 Hz, 1H), 7.36 (td, *J* = 7.5, 1.5 Hz, 1H), 7.17 (d, *J* = 7.0 Hz, 1H), 7.10 (td, *J* = 7.5, 1.5 Hz, 1H), 6.86 (d, *J* = 8.0 Hz, 1H), 6.77 – 6.73 (m, 2H), 6.02 (q, *J* = 1.5 Hz, 2H), 3.07 (dd, *J* = 10.5, 5.0 Hz, 1H), 2.17 – 2.11 (m, 1H), 1.63 – 1.58 (m, 1H), 1.51 (s, 3H) ppm.

**<sup>13</sup>C NMR (126 MHz, CDCl<sub>3</sub>):** δ 167.3, 154.0 (dd, *J* = 291.6, 289.4 Hz), 148.2, 147.7, 147.0, 138.4, 137.8, 133.8, 132.5, 129.0, 128.7, 126.4 (t, *J* = 3.8 Hz), 125.9, 125.1, 124.4, 123.0, 121.7 (t, *J* = 3.2 Hz), 117.4, 108.7, 108.5 (t, *J* = 3.4 Hz), 101.4, 88.7 (dd, *J* = 21.8, 14.1 Hz), 74.9, 47.2, 31.9, 27.0 ppm.

**<sup>19</sup>F NMR (471 MHz, CDCl<sub>3</sub>):** δ -89.3 (d, *J* = 38.2 Hz), -89.9 (dd, *J* = 38.6, 4.2 Hz) ppm.

**HRMS (ESI<sup>+</sup>):** *m/z*: [M+Na]<sup>+</sup> calcd for C<sub>26</sub>H<sub>19</sub>F<sub>2</sub>NNaO<sub>3</sub><sup>+</sup> 454.1225, found 454.1240.

[α]<sub>D</sub><sup>25</sup> = 236.8° (c = 0.50 in CHCl<sub>3</sub>). The enantiomeric excess was determined by HPLC: e.r. = 94.3:5.7 (Chiralpak AD-H, *i*-propanol/hexane = 5/95, flow rate 1.0 mL/min, λ = 254 nm); *t*<sub>major</sub> = 28.035 min, *t*<sub>minor</sub> = 24.900 min.

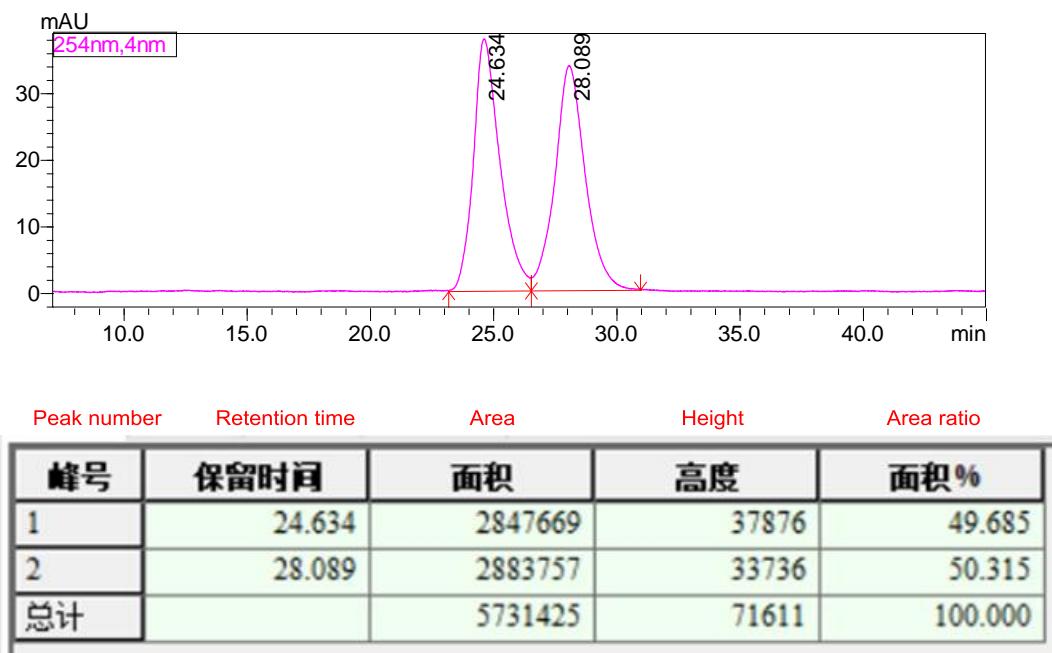

Figure S21. HPLC chromatography of the racemic product 13

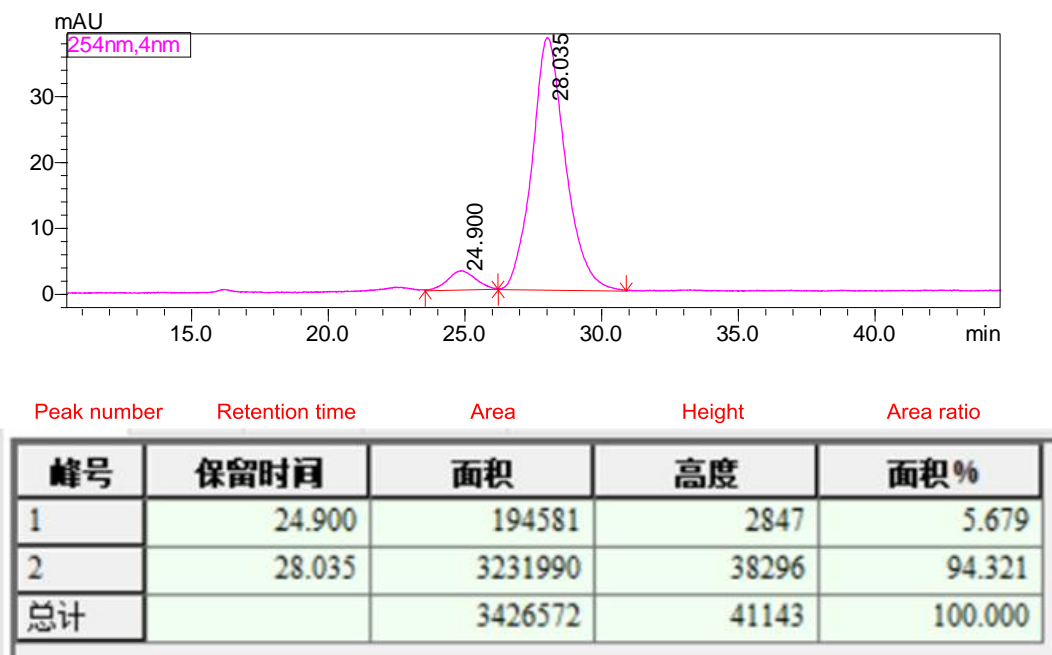

Figure S22. HPLC chromatography of chiral product 13

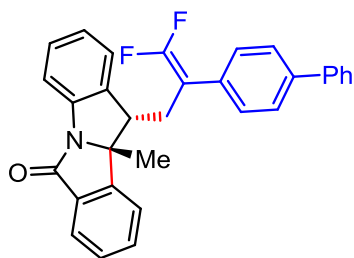



**(10*b*R,11*S*)-11-(2-([1,1'-Biphenyl]-4-yl)-3,3-difluoroallyl)-10*b*-methyl-10*b*,11-dihydro-6*H*-isoindolo[2,1-*a*]indol-6-one, 14**

This compound was prepared according to the general procedure 3.2. Purification by column chromatography on silica gel (Petroleum ether/Ethyl acetate = 7/1, v/v) afforded **14** as a white solid (64.8 mg, 0.140 mmol, 70% yield). **m.p.** 56.4 – 58.5 °C.

**<sup>1</sup>H NMR (500 MHz, CDCl<sub>3</sub>):** δ 7.95 (d, *J* = 7.5 Hz, 1H), 7.75 (d, *J* = 7.5 Hz, 1H), 7.69 (td, *J* = 7.5, 1.5 Hz, 1H), 7.63 (t, *J* = 8.5 Hz, 4H), 7.57 – 7.53 (m, 2H), 7.46 (t, *J* = 7.0 Hz, 2H), 7.38 – 7.34 (m, 4H), 7.20 (d, *J* = 7.0 Hz, 1H), 7.10 (td, *J* = 7.5, 1.5 Hz, 1H), 3.13 (dd, *J* = 11.0, 5.0 Hz, 1H), 2.30 – 2.24 (m, 1H), 1.70 – 1.65 (m, 1H), 1.51 (s, 3H) ppm.

**<sup>13</sup>C NMR (126 MHz, CDCl<sub>3</sub>):** δ 167.3, 154.2 (dd, *J* = 293.1, 289.9 Hz), 147.7, 140.39, 140.35, 138.4, 137.8, 133.9, 132.5, 131.7 (t, *J* = 3.9 Hz), 129.1, 129.0, 128.7, 128.4 (t, *J* = 3.4 Hz), 127.7, 127.6, 127.1, 126.0, 125.1, 124.4, 123.0, 117.4, 88.8 (dd, *J* = 21.2, 13.7 Hz), 75.0, 47.4 (t, *J* = 2.5 Hz), 31.5, 27.0 ppm.

**<sup>19</sup>F NMR (471 MHz, CDCl<sub>3</sub>):** δ -87.9 (d, *J* = 35.8 Hz), -89.1 (dd, *J* = 35.8, 4.2 Hz) ppm.

**HRMS (ESI<sup>+</sup>):** *m/z*: [M+H]<sup>+</sup> calcd for C<sub>31</sub>H<sub>24</sub>F<sub>2</sub>NO<sup>+</sup> 464.1820, found 464.1818.

[α]<sub>D</sub><sup>25</sup> = 196.0° (c = 0.50 in CHCl<sub>3</sub>). The enantiomeric excess was determined by HPLC: e.r. = 97.3:2.7 (Chiralpak AD-H, *i*-propanol/hexane = 10/90, flow rate 1.0 mL/min, λ = 254 nm); *t*<sub>major</sub> = 29.315 min, *t*<sub>minor</sub> = 15.896 min.

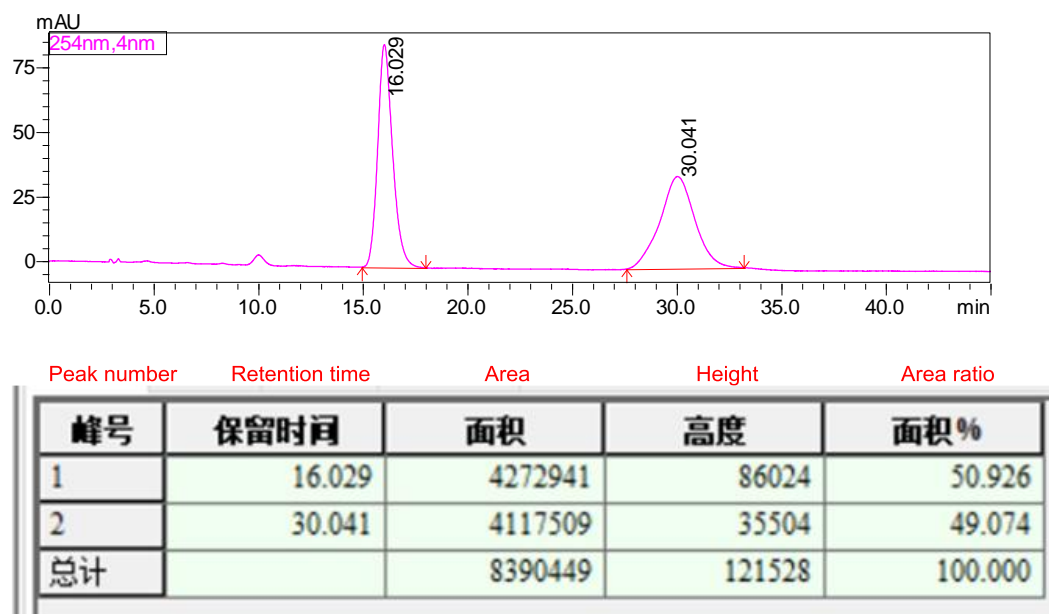

**Figure S23.** HPLC chromatography of the racemic product **14**

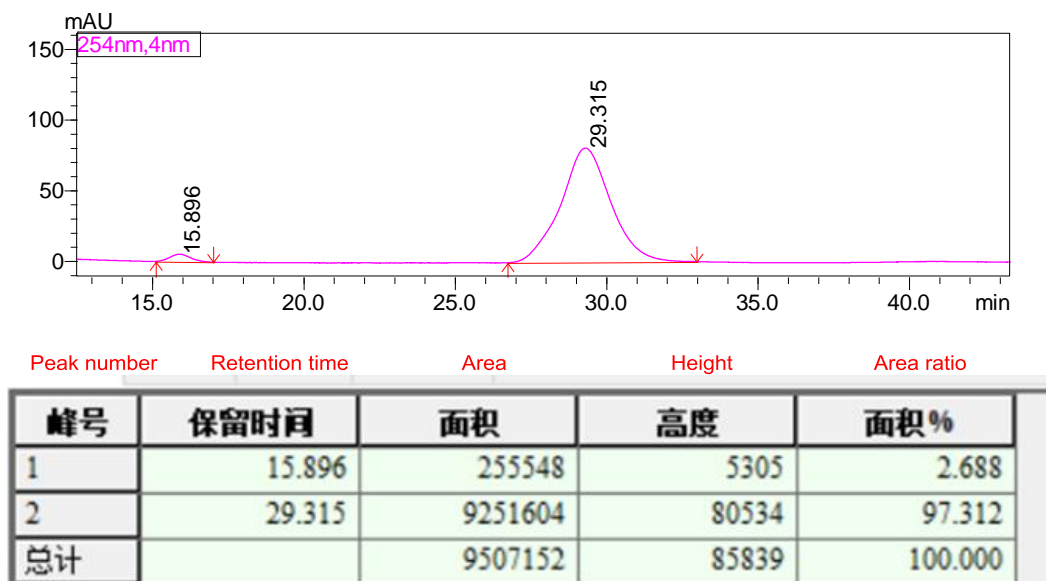

Figure S24. HPLC chromatography of chiral product **14**

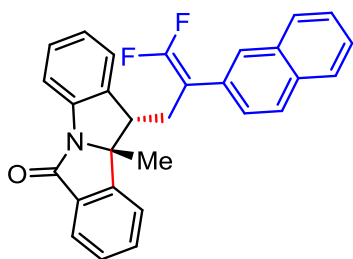

**(10bR,11S)-11-(3,3-Difluoro-2-(naphthalen-2-yl)allyl)-10b-methyl-10b,11-dihydro-6H-isoindolo[2,1-a]indol-6-one, 15**

This compound was prepared according to the general procedure **3.2**. Purification by column chromatography on silica gel (Petroleum ether/Ethyl acetate = 7/1, v/v) afforded **15** as a white solid (42.3 mg, 0.097 mmol, 48% yield). **m.p.** 47.1 – 49.4 °C.

**<sup>1</sup>H NMR (500 MHz, CDCl<sub>3</sub>):** δ 7.95 (d, *J* = 7.5 Hz, 1H), 7.90 – 7.84 (m, 3H), 7.75 (d, *J* = 8.0 Hz, 1H), 7.71 – 7.69 (m, 2H), 7.57 – 7.51 (m, 4H), 7.39 (d, *J* = 8.5 Hz, 1H), 7.36 (t, *J* = 7.5 Hz, 1H), 7.23 (d, *J* = 9.0 Hz, 1H), 7.10 (t, *J* = 7.5 Hz, 1H), 3.10 (dd, *J* = 11.0, 5.0 Hz, 1H), 2.36 – 2.31 (m, 1H), 1.77 – 1.72 (m, 1H), 1.47 (s, 3H) ppm.

**<sup>13</sup>C NMR (126 MHz, CDCl<sub>3</sub>):** δ 167.3, 154.3 (dd, *J* = 292.8, 289.8 Hz), 147.7, 138.5, 137.8, 133.9, 133.4, 132.6, 132.5, 130.3 (t, *J* = 3.8 Hz), 129.1, 128.8, 128.7, 128.1, 127.7, 127.4 (t, *J* = 3.3 Hz), 126.7, 126.6, 126.0, 125.7 (t, *J* = 3.2 Hz), 125.2, 124.5, 123.0, 117.4, 89.2 (dd, *J* = 21.4, 14.1 Hz), 75.0, 47.4, 31.8, 27.0 ppm.

**<sup>19</sup>F NMR (471 MHz, CDCl<sub>3</sub>):** δ -87.9 (d, *J* = 36.3 Hz), -89.3 (dd, *J* = 36.3, 4.2 Hz) ppm.

**HRMS (ESI<sup>+</sup>):**  $m/z$ : [M+Na]<sup>+</sup> calcd for C<sub>29</sub>H<sub>21</sub>F<sub>2</sub>NNaO<sup>+</sup> 460.1483, found 460.1485.

$[\alpha]_D^{25} = 19.2^\circ$  ( $c = 0.25$  in CHCl<sub>3</sub>). The enantiomeric excess was analysed by HPLC: e.r. = 97.5:2.5 (Chiralpak AD-H, *i*-propanol/hexane = 5/95, flow rate 1.0 mL/min,  $\lambda = 254$  nm);  $t_{\text{major}} = 25.461$  min,  $t_{\text{minor}} = 18.927$  min.

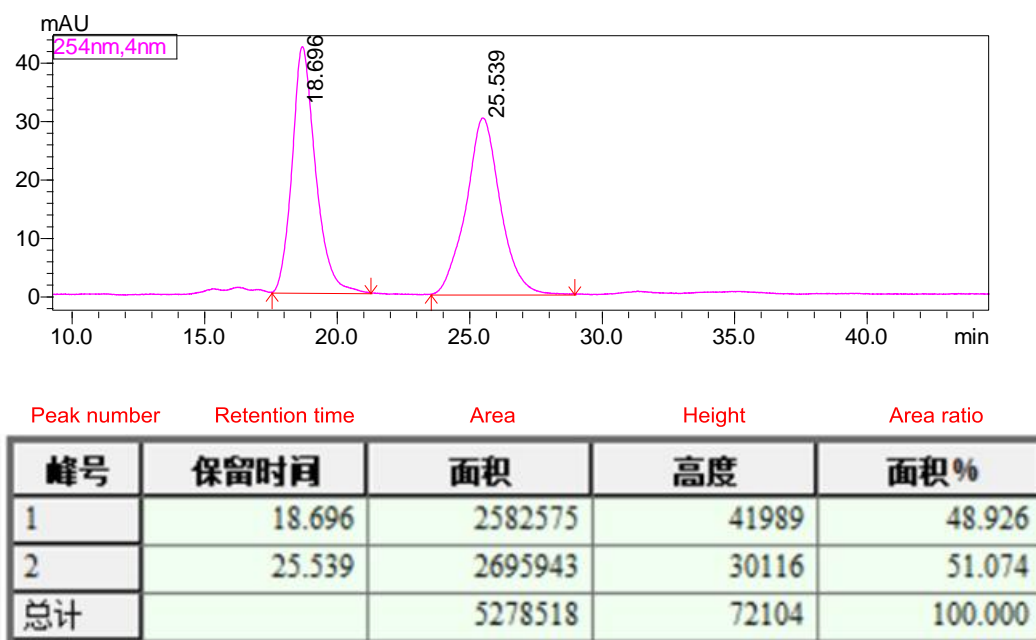

**Figure S25.** HPLC chromatography of the racemic product **15**

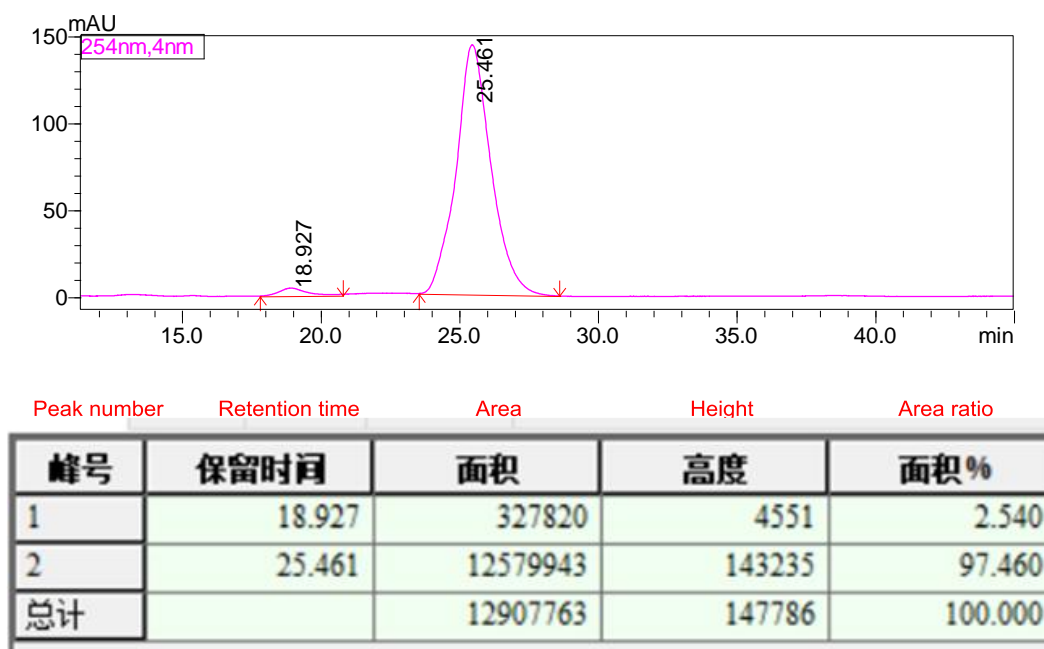

**Figure S26.** HPLC chromatography of chiral product **15**

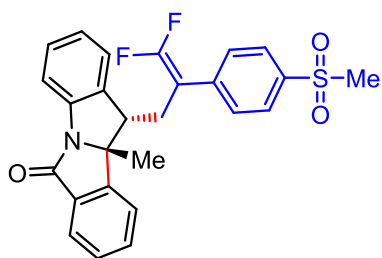

**(10bR,11S)-11-(3,3-Difluoro-2-(4-(methylsulfonyl)phenyl)allyl)-10b-methyl-10b,11-dihydro-6H-isoindolo[2,1-a]indol-6-one, 16**

This compound was prepared according to the general procedure **3.2**. Purification by column chromatography on silica gel (Petroleum ether/Ethyl acetate = 5/1 to 2/1, v/v) afforded **16** a white solid (78.0 mg, 0.168 mmol, 84% yield). **m.p.** 158.9 – 160.5 °C.

**<sup>1</sup>H NMR (500 MHz, CDCl<sub>3</sub>):** δ 7.94 (d, *J* = 8.5 Hz, 3H), 7.73 – 7.69 (m, 2H), 7.57 (td, *J* = 7.5, 1.0 Hz, 1H), 7.53 (d, *J* = 7.5 Hz, 1H), 7.38 – 7.34 (m, 3H), 7.11 (d, *J* = 8.0 Hz, 1H), 7.06 (td, *J* = 7.5, 1.0 Hz, 1H), 3.11 – 3.08 (m, 4H), 2.34 – 2.29 (m, 1H), 1.71 – 1.66 (m, 1H), 1.53 (s, 3H) ppm.

**<sup>13</sup>C NMR (126 MHz, CDCl<sub>3</sub>):** δ 167.1, 154.6 (dd, *J* = 295.7, 292.3 Hz), 147.4, 139.3, 138.9 (t, *J* = 4.4 Hz), 137.8, 137.7, 133.8, 132.6, 129.2, 128.93, 128.86 (t, *J* = 3.7 Hz), 127.9, 125.9, 125.2, 124.4, 122.9, 117.5, 88.5 (dd, *J* = 22.3, 13.0 Hz), 74.9, 47.4, 44.5, 31.2, 26.9 ppm.

**<sup>19</sup>F NMR (471 MHz, CDCl<sub>3</sub>):** δ -84.6 (d, *J* = 29.2 Hz), -86.5 (dd, *J* = 29.2, 3.8 Hz) ppm.

**HRMS (ESI<sup>+</sup>):** *m/z*: [M+Na]<sup>+</sup> calcd for C<sub>26</sub>H<sub>21</sub>F<sub>2</sub>NNaO<sub>3</sub>S<sup>+</sup> 488.1102, found 488.1105.

[α]<sub>D</sub><sup>25</sup> = 41.6° (c = 0.50 in CHCl<sub>3</sub>). The enantiomeric excess was determined by HPLC: e.r. = 98.3:1.7 (Chiralpak AD-H, *i*-propanol/hexane = 30/70, flow rate 1.0 mL/min, λ = 254 nm); *t*<sub>major</sub> = 22.195 min, *t*<sub>minor</sub> = 25.935 min.

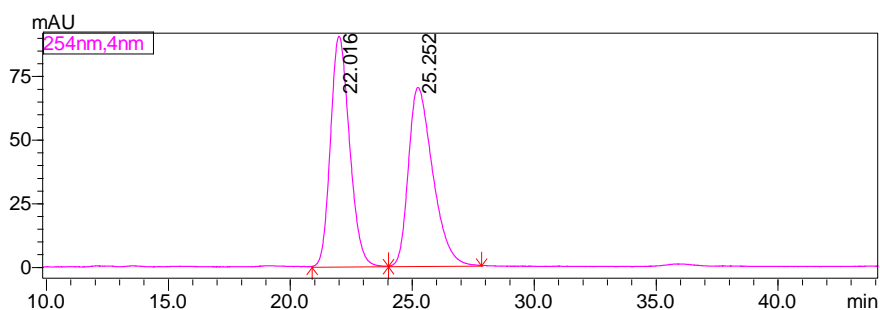

| Peak number | Retention time | Area    | Height | Area ratio |
|-------------|----------------|---------|--------|------------|
| 峰号          | 保留时间           | 面积      | 高度     | 面积%        |
| 1           | 22.016         | 4896287 | 90467  | 50.252     |
| 2           | 25.252         | 4847229 | 70121  | 49.748     |
| 总计          |                | 9743516 | 160588 | 100.000    |

Figure S27. HPLC chromatography of the racemic product 16

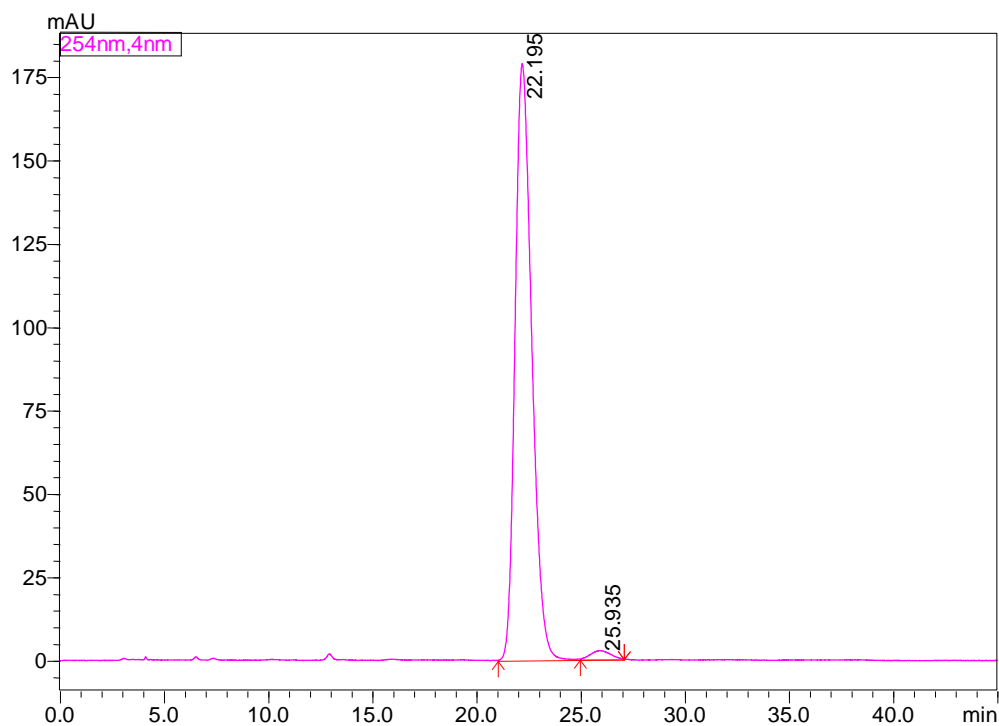

| Peak number | Retention time | Area     | Height | Area ratio |
|-------------|----------------|----------|--------|------------|
| 峰号          | 保留时间           | 面积       | 高度     | 面积%        |
| 1           | 22.195         | 9930701  | 179042 | 98.344     |
| 2           | 25.935         | 167192   | 2574   | 1.656      |
| 总计          |                | 10097893 | 181616 | 100.000    |

Figure S28. HPLC chromatography of chiral product 16

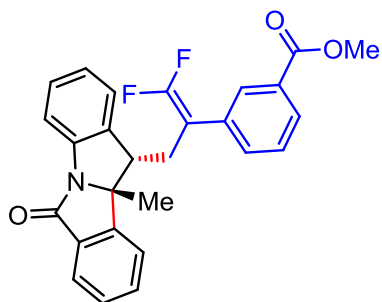

**Methyl 3-(1,1-difluoro-3-((10b*R*,11*S*)-10b-methyl-6-oxo-10b,11-dihydro-6*H*-isoindolo[2,1-*a*]indol-11-yl)prop-1-en-2-yl)benzoate, 17**

This compound was prepared according to the general procedure 3.2. Purification by column chromatography on silica gel (Petroleum ether/Ethyl acetate = 5/1, v/v) afforded 17 as colorless oil (58.8 mg, 0.132 mmol, 66% yield).

**<sup>1</sup>H NMR (500 MHz, CDCl<sub>3</sub>):** δ 8.00 – 7.94 (m, 3H), 7.74 (d, *J* = 8.0 Hz, 1H), 7.70 (td, *J* = 7.5, 1.0 Hz, 1H), 7.58 – 7.53 (m, 2H), 7.50 – 7.44 (m, 2H), 7.36 (td, *J* = 7.5, 1.5 Hz, 1H), 7.16 (d, *J* = 7.0 Hz, 1H), 7.09 (td, *J* = 7.5, 1.0 Hz, 1H), 3.98 (s, 3H), 3.06 (dd, *J* = 10.5, 5.0 Hz, 1H), 2.30 – 2.25 (m, 1H), 1.73 – 1.67 (m, 1H), 1.50 (s, 3H) ppm.

**<sup>13</sup>C NMR (126 MHz, CDCl<sub>3</sub>):** δ 167.2, 166.8, 154.3 (dd, *J* = 293.7, 290.6 Hz), 147.6, 138.2, 137.8, 133.8, 133.3 (t, *J* = 4.2 Hz), 132.6, 132.5 (dd, *J* = 4.4, 3.0 Hz), 130.8, 129.1, 129.05, 129.02, 128.8, 128.7, 125.9, 125.1, 124.5, 123.0, 117.5, 88.6 (dd, *J* = 21.9, 13.7 Hz), 75.0, 52.5, 47.4 (t, *J* = 2.1 Hz), 31.4, 27.0 ppm.

**<sup>19</sup>F NMR (471 MHz, CDCl<sub>3</sub>):** δ -87.1 (d, *J* = 33.9 Hz), -88.4 (dd, *J* = 34.4, 4.2 Hz) ppm.

**HRMS (ESI<sup>+</sup>):** *m/z*: [M+Na]<sup>+</sup> calcd for C<sub>27</sub>H<sub>21</sub>F<sub>2</sub>NNaO<sub>3</sub><sup>+</sup> 468.1382, found 468.1383.

[α]<sub>D</sub><sup>25</sup> = 152.8° (c = 0.50 in CHCl<sub>3</sub>). The enantiomeric excess was determined by HPLC: e.r. = 99.0:0.9 (Chiralpak AD-H, *i*-propanol/hexane = 15/85, flow rate 1.0 mL/min, λ = 254 nm); *t*<sub>major</sub> = 11.311 min, *t*<sub>minor</sub> = 10.123 min.

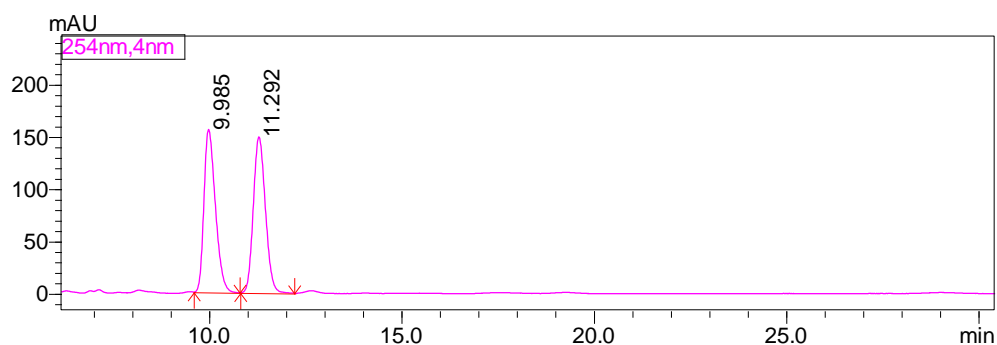

| Peak number | Retention time | Area    | Height | Area ratio |
|-------------|----------------|---------|--------|------------|
| 峰号          | 保留时间           | 面积      | 高度     | 面积%        |
| 1           | 9.985          | 3228847 | 156045 | 49.716     |
| 2           | 11.292         | 3265799 | 149796 | 50.284     |
| 总计          |                | 6494646 | 305842 | 100.000    |

**Figure S29.** HPLC chromatography of the racemic product 17

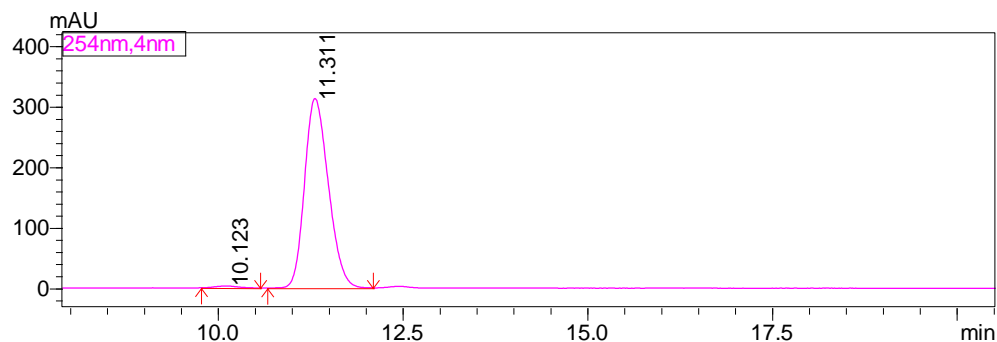

| Peak number | Retention time | Area    | Height | Area ratio |
|-------------|----------------|---------|--------|------------|
| 峰号          | 保留时间           | 面积      | 高度     | 面积%        |
| 1           | 10.123         | 61604   | 3026   | 0.869      |
| 2           | 11.311         | 7028977 | 313824 | 99.131     |
| 总计          |                | 7090581 | 316850 | 100.000    |

Figure S30. HPLC chromatography of chiral product 17

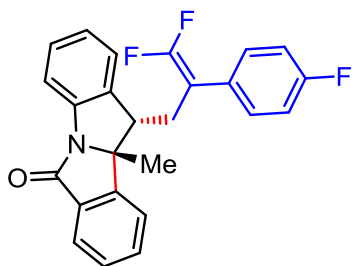

**(10bR,11S)-11-(3,3-Difluoro-2-(4-fluorophenyl)allyl)-10b-methyl-10b,11-dihydro-6H-isoindolo[2,1-a]indol-6-one, 18**

This compound was prepared according to the general procedure 3.2. Purification by column chromatography on silica gel (Petroleum ether/Ethyl acetate = 7/1, v/v) afforded **18** as a white solid (49.2 mg, 0.121 mmol, 61% yield). **m.p.** 97.9 – 99.0 °C.

**<sup>1</sup>H NMR (500 MHz, CDCl<sub>3</sub>):** δ 7.94 (d, *J* = 7.5 Hz, 1H), 7.73 (d, *J* = 8.0 Hz, 1H), 7.68 (t, *J* = 7.5 Hz, 1H), 7.55 (t, *J* = 7.5 Hz, 1H), 7.50 (d, *J* = 7.5 Hz, 1H), 7.35 (t, *J* = 7.5 Hz, 1H), 7.22 – 7.20 (m, 2H), 7.14 (d, *J* = 7.5 Hz, 1H), 7.11 – 7.07 (m, 3H), 3.07 (dd, *J* = 10.5, 5.0 Hz, 1H), 2.23 – 2.18 (m, 1H), 1.66 – 1.60 (m, 1H), 1.51 (s, 3H) ppm.

**<sup>13</sup>C NMR (126 MHz, CDCl<sub>3</sub>):** δ 167.2, 162.0 (d, *J* = 248.3 Hz), 154.1 (dd, *J* = 291.6, 290.1 Hz), 147.6, 138.2, 137.8, 133.8, 132.5, 129.84 – 129.72 (m, 2C), 129.1, 128.8, 125.9, 125.2, 124.4, 123.0, 117.5, 115.9 (d, *J* = 21.5 Hz), 88.3 (dd, *J* = 21.7, 14.2 Hz), 75.0, 47.3 (t, *J* = 2.6 Hz), 31.8, 27.0 ppm.

$^{19}\text{F}$  NMR (471 MHz,  $\text{CDCl}_3$ ):  $\delta$  -88.5 (d,  $J = 37.2$  Hz), -89.7 (dd,  $J = 37.2, 4.2$  Hz), -113.9 (m) ppm.

HRMS ( $\text{ESI}^+$ ):  $m/z$ :  $[\text{M}+\text{Na}]^+$  calcd for  $\text{C}_{25}\text{H}_{18}\text{F}_3\text{NNaO}^+$  428.1233, found 428.1230.

$[\alpha]_D^{25} = 114.8^\circ$  ( $c = 0.50$  in  $\text{CHCl}_3$ ). The enantiomeric excess was determined by HPLC: e.r. = 98.8:1.2 (Chiralpak AD-H, *i*-propanol/hexane = 5/95, flow rate 1.0 mL/min,  $\lambda = 254$  nm);  $t_{\text{major}} = 19.963$  min,  $t_{\text{minor}} = 14.339$  min.

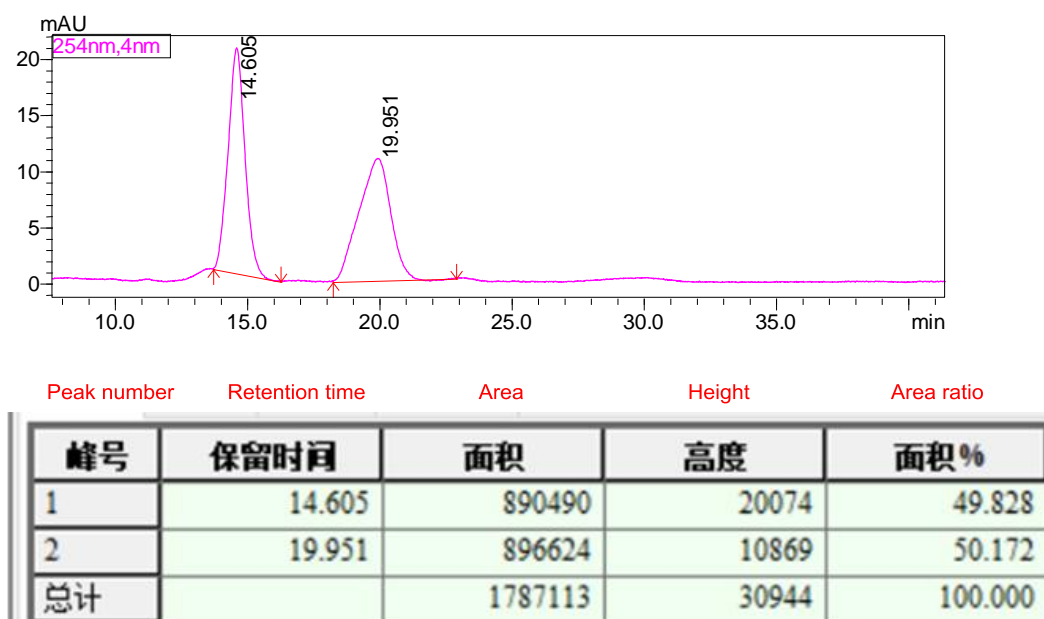

Figure S31. HPLC chromatography of the racemic product **18**

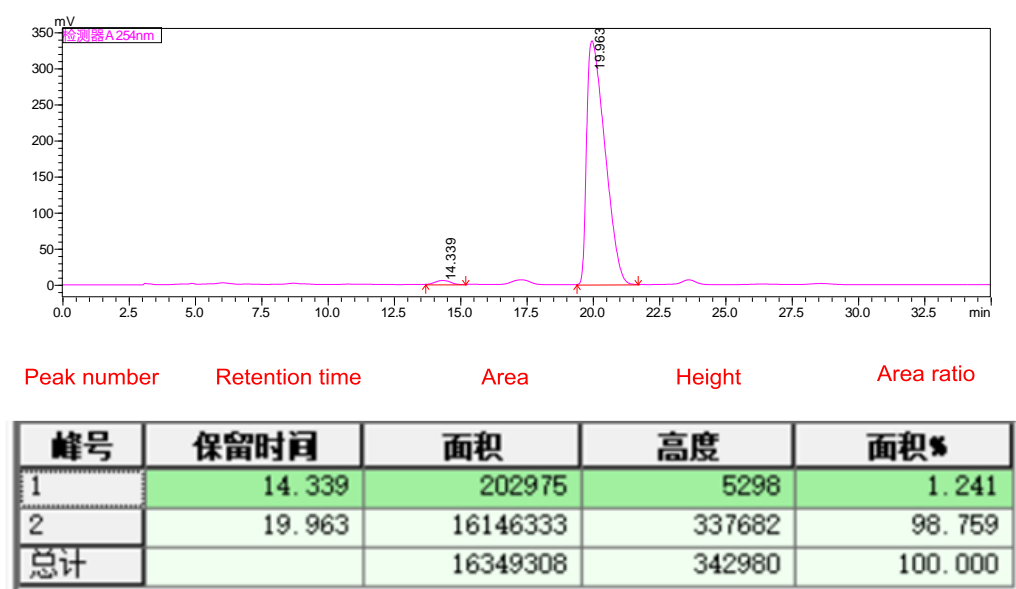

Figure S32. HPLC chromatography of chiral product **18**



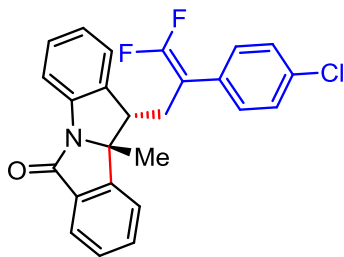

**(10bR,11S)-11-(2-(4-Chlorophenyl)-3,3-difluoroallyl)-10b-methyl-10b,11-dihydro-6H-isoindolo[2,1-a]indol-6-one, 19**

This compound was prepared according to the general procedure **3.2**. Purification by column chromatography on silica gel (Petroleum ether/Ethyl acetate = 7/1, v/v) afforded **19** as yellow oil (53.2 mg, 0.126 mmol, 63% yield).

**<sup>1</sup>H NMR (500 MHz, CDCl<sub>3</sub>):** δ 7.94 (d, *J* = 7.5 Hz, 1H), 7.73 (d, *J* = 7.5 Hz, 1H), 7.68 (td, *J* = 7.5, 1.0 Hz, 1H), 7.55 (td, *J* = 7.5, 1.0 Hz, 1H), 7.50 (d, *J* = 7.5 Hz, 1H), 7.38 – 7.34 (m, 3H), 7.17 (dd, *J* = 8.5, 1.5 Hz, 2H), 7.13 (d, *J* = 6.0 Hz, 1H), 7.08 (td, *J* = 7.5, 1.0 Hz, 1H), 3.06 (dd, *J* = 11.0, 5.0 Hz, 1H), 2.23 – 2.18 (m, 1H), 1.65 – 1.60 (m, 1H), 1.50 (s, 3H) ppm.

**<sup>13</sup>C NMR (126 MHz, CDCl<sub>3</sub>):** δ 167.2, 154.1 (dd, *J* = 293.2, 290.2 Hz), 147.6, 138.1, 137.8, 133.8, 133.4, 132.5, 131.3 (t, *J* = 4.2 Hz), 129.4 (t, *J* = 3.5 Hz), 129.14, 129.10, 128.8, 125.9, 125.2, 124.4, 123.0, 117.5, 88.3 (dd, *J* = 21.8, 13.7 Hz), 74.9, 47.4 (t, *J* = 2.1 Hz), 31.5, 27.0 ppm.

**<sup>19</sup>F NMR (471 MHz, CDCl<sub>3</sub>):** δ -87.5 (d, *J* = 35.3 Hz), -88.8 (dd, *J* = 34.9, 3.8 Hz) ppm.

**HRMS (ESI<sup>+</sup>):** *m/z*: [M+H]<sup>+</sup> calcd for C<sub>25</sub>H<sub>19</sub>ClF<sub>2</sub>NO<sup>+</sup> 422.1118, found 422.1121.

[α]<sub>D</sub><sup>25</sup> = 189.6° (c = 0.50 in CHCl<sub>3</sub>). The enantiomeric excess was determined analysed by HPLC: e.r. = 98.2:1.8 (Chiralpak ID *i*-propanol/hexane = 10/90, flow rate 1.0 mL/min, λ = 254 nm); *t*<sub>major</sub> = 37.932 min, *t*<sub>minor</sub> = 26.461 min.

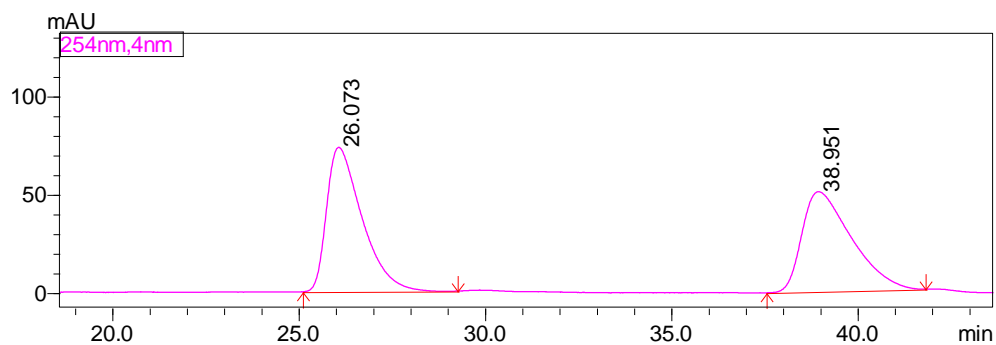

| Peak number | Retention time | Area    | Height | Area ratio |
|-------------|----------------|---------|--------|------------|
| 峰号          | 保留时间           | 面积      | 高度     | 面积%        |
| 1           | 26.073         | 4881067 | 73854  | 50.827     |
| 2           | 38.951         | 4722214 | 51104  | 49.173     |
| 总计          |                | 9603281 | 124958 | 100.000    |

Figure S33. HPLC chromatography of the racemic product **19**

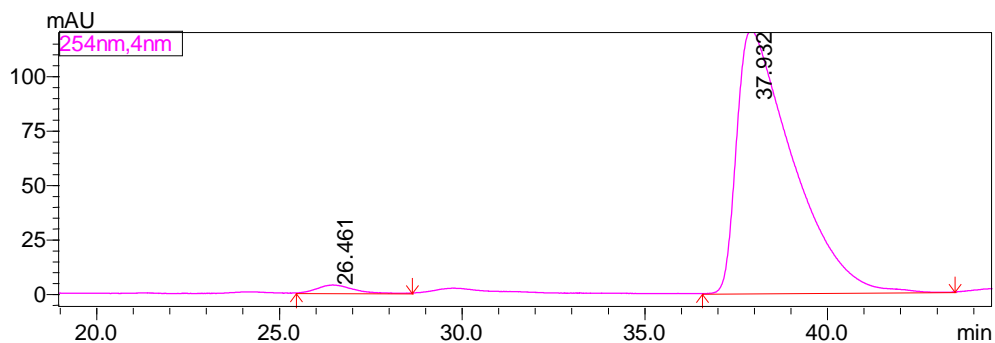

| Peak number | Retention time | Area     | Height | Area ratio |
|-------------|----------------|----------|--------|------------|
| 峰号          | 保留时间           | 面积       | 高度     | 面积%        |
| 1           | 26.461         | 236388   | 3734   | 1.806      |
| 2           | 37.932         | 12849970 | 121402 | 98.194     |
| 总计          |                | 13086358 | 125136 | 100.000    |

Figure S34. HPLC chromatography of chiral product **19**

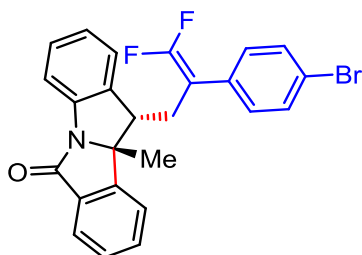

**(10bR,11S)-11-(2-(4-Bromophenyl)-3,3-difluoroallyl)-10b-methyl-10b,11-dihydro-6H-isoindolo[2,1-a]indol-6-one, 20**

This compound was prepared according to the general procedure **3.2**, but the reaction was run on 100 °C for 36 h. Purification by column chromatography on silica gel (Petroleum ether/Ethyl acetate = 7/1, v/v) afforded **20** as colorless oil (41.0 mg, 0.088 mmol, 44% yield).

$^1\text{H NMR}$  (500 MHz,  $\text{CDCl}_3$ ):  $\delta$  7.94 (d,  $J = 7.5$  Hz, 1H), 7.73 (d,  $J = 7.5$  Hz, 1H), 7.68

(td,  $J = 7.5, 1.0$  Hz, 1H), 7.56 (t,  $J = 7.5$  Hz, 1H), 7.53 (d,  $J = 8.5$  Hz, 2H), 7.49 (d,  $J = 7.5$  Hz, 1H), 7.36 (td,  $J = 7.5, 1.5$  Hz, 1H), 7.13 – 7.07 (m, 4H), 3.05 (dd,  $J = 10.5, 5.0$  Hz, 1H), 2.23 – 2.17 (m, 1H), 1.65 – 1.59 (m, 1H), 1.51 (s, 3H) ppm.

$^{13}\text{C}$  NMR (126 MHz,  $\text{CDCl}_3$ ):  $\delta$  167.2, 154.1 (dd,  $J = 293.6, 290.7$  Hz), 147.6, 138.2, 137.8, 133.9, 132.6, 132.1, 131.9 (t,  $J = 4.2$  Hz), 129.7 (t,  $J = 3.4$  Hz), 129.1, 128.9, 125.9, 125.2, 124.5, 123.0, 121.6, 117.5, 88.4 (dd,  $J = 21.9, 13.7$  Hz), 75.0, 47.4 (t,  $J = 2.5$  Hz), 31.5, 27.0 ppm.

$^{19}\text{F}$  NMR (471 MHz,  $\text{CDCl}_3$ ):  $\delta$  -87.3 (d,  $J = 33.9$  Hz), -88.6 (dd,  $J = 34.9, 4.2$  Hz) ppm.

HRMS (ESI<sup>+</sup>):  $m/z$ :  $[\text{M}+\text{Na}]^+$  calcd for  $\text{C}_{25}\text{H}_{18}\text{BrF}_2\text{NNaO}^+$  488.0432, found 488.0430.

$[\alpha]_D^{25} = 174.4^\circ$  ( $c = 0.25$  in  $\text{CHCl}_3$ ). The enantiomeric excess was determined by HPLC: e.r. = 95.7:4.3 (Chiralpak AD-H, *i*-propanol/hexane = 20/80, flow rate 1.0 mL/min,  $\lambda = 254$  nm);  $t_{\text{major}} = 23.430$  min,  $t_{\text{minor}} = 16.522$  min.

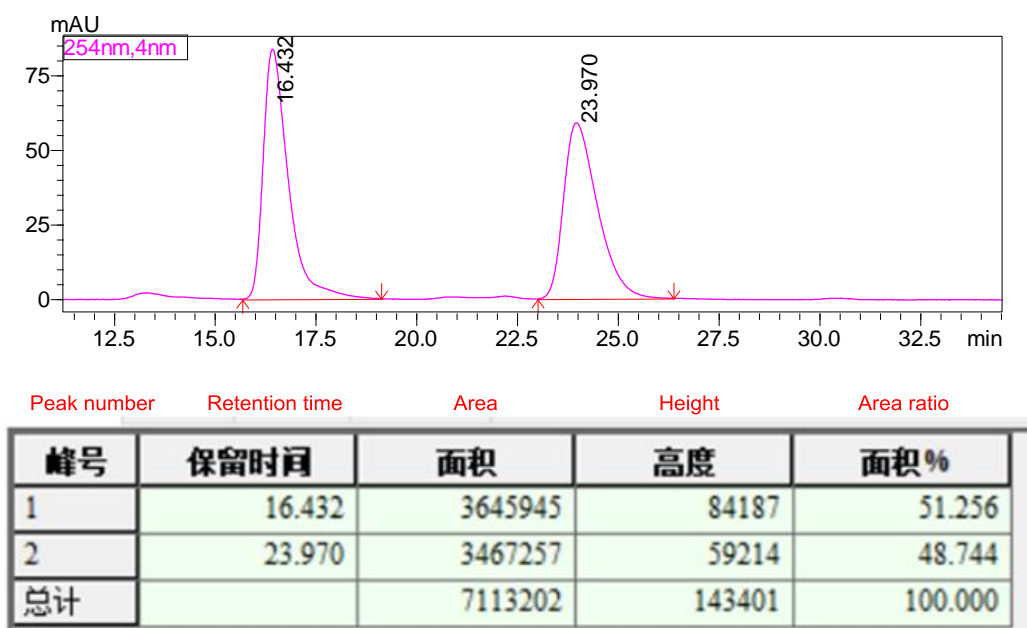

Figure S35. HPLC chromatography of the racemic product **20**

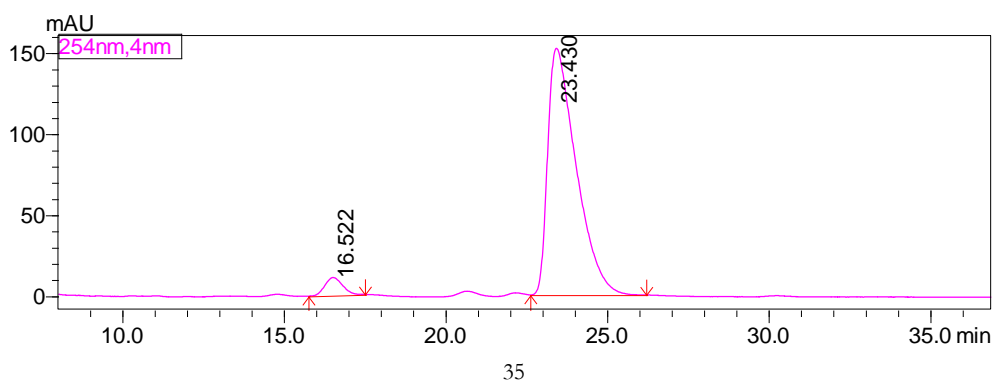

| Peak number | Retention time | Area    | Height | Area ratio |
|-------------|----------------|---------|--------|------------|
| 峰号          | 保留时间           | 面积      | 高度     | 面积%        |
| 1           | 16.522         | 420858  | 11086  | 4.303      |
| 2           | 23.430         | 9359107 | 152918 | 95.697     |
| 总计          |                | 9779966 | 164003 | 100.000    |

Figure S36. HPLC chromatography of chiral product **20**

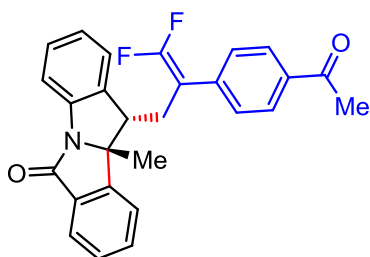

**(10bR,11S)-11-(2-(4-Acetylphenyl)-3,3-difluoroallyl)-10b-methyl-10b,11-dihydro-6H-isoindolo[2,1-a]indol-6-one, **21****

This compound was prepared according to the general procedure **3.2**. Purification by column chromatography on silica gel (Petroleum ether/Ethyl acetate = 5/1, v/v) afforded **21** as a white solid (68.9 mg, 0.160 mmol, 80% yield). **m.p.** 47.5 – 48.7 °C.

**<sup>1</sup>H NMR (500 MHz, CDCl<sub>3</sub>):** δ 7.99 (d, *J* = 8.5 Hz, 2H), 7.94 (d, *J* = 7.5 Hz, 1H), 7.73 (d, *J* = 8.0 Hz, 1H), 7.70 (t, *J* = 7.5 Hz, 1H), 7.56 (t, *J* = 7.5 Hz, 1H), 7.53 (d, *J* = 7.5 Hz, 1H), 7.37 – 7.34 (m, 3H), 7.13 (d, *J* = 7.0 Hz, 1H), 7.07 (t, *J* = 7.5 Hz, 1H), 3.07 (dd, *J* = 11.0, 5.0 Hz, 1H), 2.63 (s, 3H), 2.31– 2.26 (m, 1H), 1.70 – 1.65 (m, 1H), 1.51 (s, 3H) ppm.

**<sup>13</sup>C NMR (126 MHz, CDCl<sub>3</sub>):** δ 197.4, 167.2, 154.4 (dd, *J* = 295.2, 291.3 Hz), 147.5, 138.0, 137.8 (t, *J* = 4.3 Hz), 137.7, 136.0, 133.8, 132.6, 129.1, 128.85, 128.83, 128.1 (t, *J* = 3.7 Hz), 125.9, 125.1, 124.4, 122.9, 117.5, 88.9 (dd, *J* = 21.9, 13.2 Hz), 74.9, 47.4, 31.2, 26.9, 26.7 ppm.

**<sup>19</sup>F NMR (471 MHz, CDCl<sub>3</sub>):** δ -85.7 (d, *J* = 30.6 Hz), -87.1 (dd, *J* = 30.6, 3.8 Hz) ppm.

**HRMS (ESI<sup>+</sup>):** *m/z*: [M+Na]<sup>+</sup> calcd for C<sub>27</sub>H<sub>21</sub>F<sub>2</sub>NNaO<sub>2</sub><sup>+</sup> 452.1433, found 452.1435.

[α]<sub>D</sub><sup>25</sup> = 141.6° (c = 0.50 in CHCl<sub>3</sub>). The enantiomeric excess was determined by HPLC: e.r. = 97.5:2.5 (Chiralpak AD-H, *i*-propanol/hexane = 10/90, flow rate 1.0 mL/min, λ = 254 nm); *t*<sub>major</sub> = 40.135 min, *t*<sub>minor</sub> = 35.813 min.

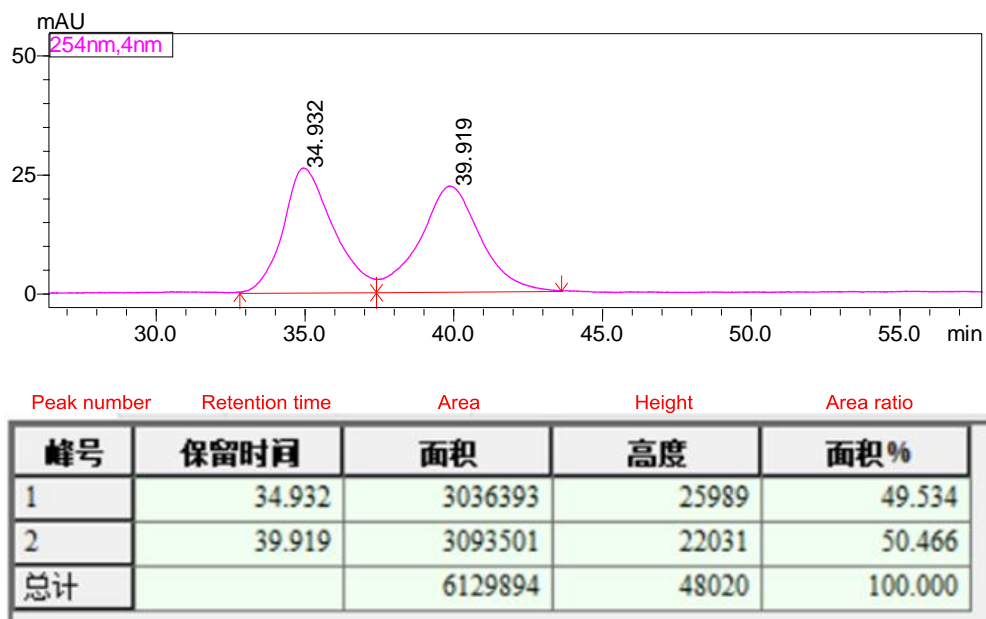

Figure S37. HPLC chromatography of the racemic product **21**

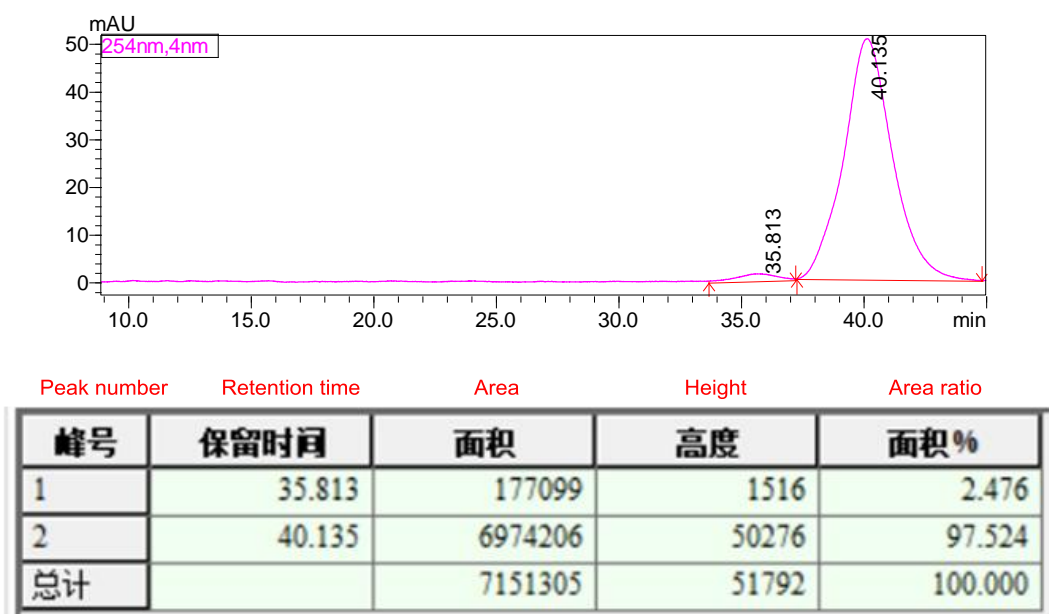

Figure S38. HPLC chromatography of chiral product **21**

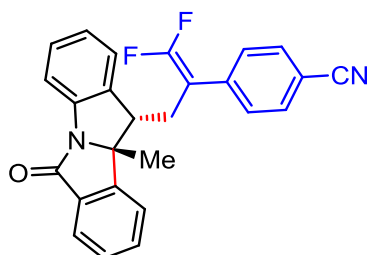

4-(1,1-Difluoro-3-((10bR,11S)-10b-methyl-6-oxo-10b,11-dihydro-6H-

## isoindolo[2,1-*a*]indol-11-yl)prop-1-en-2-yl)benzonitrile, **22**

This compound was prepared according to the general procedure **3.2**. Purification by column chromatography on silica gel (Petroleum ether/Ethyl acetate = 5/1 v/v) afforded **22** as a white solid (60.8 mg, 0.147 mmol, 74% yield). **m.p.** 137.7 – 139.9 °.

**<sup>1</sup>H NMR (500 MHz, CDCl<sub>3</sub>):** δ 7.94 (d, *J* = 7.5 Hz, 1H), 7.73 – 7.68 (m, 2H), 7.64 (d, *J* = 8.5 Hz, 2H), 7.57 (t, *J* = 7.5 Hz, 1H), 7.53 (d, *J* = 8.0 Hz, 1H), 7.35 (td, *J* = 7.0, 1.5 Hz, 1H), 7.28 (d, *J* = 7.0 Hz, 2H), 7.09 – 7.03 (m, 2H), 3.10 (dd, *J* = 11.0, 5.0 Hz, 1H), 2.31 – 2.26 (m, 1H), 1.68 – 1.63 (m, 1H), 1.53 (s, 3H) ppm.

**<sup>13</sup>C NMR (126 MHz, CDCl<sub>3</sub>):** δ 167.1, 154.6 (dd, *J* = 296.1, 292.1 Hz), 147.4, 137.9 (t, *J* = 4.5 Hz), 137.8, 137.7, 133.8, 132.6, 132.5, 129.2, 129.0, 128.6 (t, *J* = 3.9 Hz), 125.9, 125.2, 124.4, 122.9, 118.5, 117.5, 111.1, 88.7 (dd, *J* = 22.2, 12.6 Hz), 74.9, 47.5, 31.0, 26.9 ppm.

**<sup>19</sup>F NMR (471 MHz, CDCl<sub>3</sub>):** δ -84.3 (d, *J* = 27.8 Hz), -86.1 (dd, *J* = 28.7, 3.3 Hz) ppm.

**HRMS (ESI<sup>+</sup>):** *m/z*: [M+Na]<sup>+</sup> calcd for C<sub>26</sub>H<sub>18</sub>F<sub>2</sub>N<sub>2</sub>NaO<sup>+</sup> 435.1279, found 435.1278.

[α]<sub>D</sub><sup>25</sup> = 221.6° (c = 0.50 in CHCl<sub>3</sub>). The enantiomeric excess was determined by HPLC: e.r. = 97.6:2.4 (Chiralpak ID, *i*-propanol/hexane = 40/60, flow rate 1.0 mL/min, λ = 254 nm); *t*<sub>major</sub> = 20.729 min, *t*<sub>minor</sub> = 16.569 min.

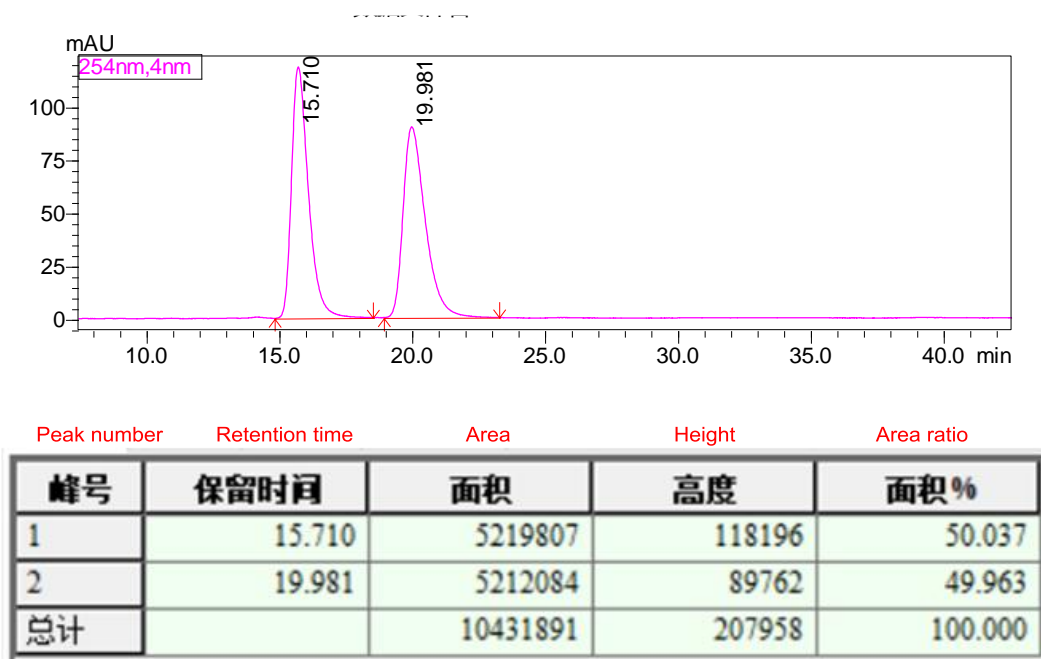

**Figure S39.** HPLC chromatography of the racemic product **22**

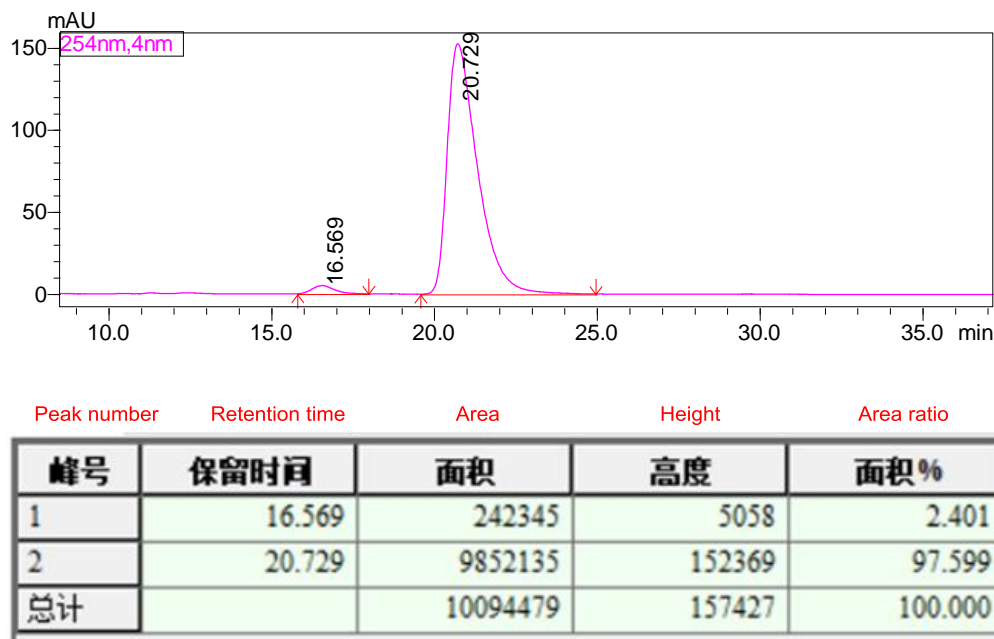

Figure S40. HPLC chromatography of chiral product **22**

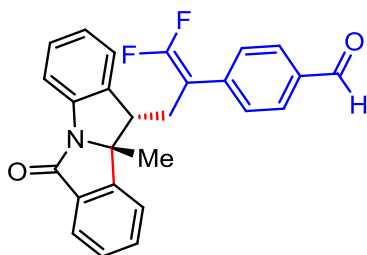

**4-(1,1-Difluoro-3-((10bR,11S)-10b-methyl-6-oxo-10b,11-dihydro-6H-isoindolo[2,1-a]indol-11-yl)prop-1-en-2-yl)benzaldehyde, **23****

This compound was prepared according to the general procedure **3.2**. Purification by column chromatography on silica gel (Petroleum ether/Ethyl acetate = 5/1, v/v) afforded **23** as a white solid (66.7 mg, 0.160 mmol, 80% yield). **m.p.** 57.1 – 59.3 °C.

**<sup>1</sup>H NMR (500 MHz, CDCl<sub>3</sub>):** δ 10.02 (s, 1H), 7.95 (d, *J* = 7.5 Hz, 1H), 7.90 (d, *J* = 8.5 Hz, 2H), 7.73 (d, *J* = 7.5 Hz, 1H), 7.70 (td, *J* = 7.5, 1.0 Hz, 1H), 7.57 (td, *J* = 7.5, 1.0 Hz, 1H), 7.54 (d, *J* = 7.5 Hz, 1H), 7.40 (dd, *J* = 8.0, 1.5 Hz, 2H), 7.35 (td, *J* = 7.5, 1.0 Hz, 1H), 7.12 (d, *J* = 6.5 Hz, 1H), 7.07 (td, *J* = 7.5, 1.0 Hz, 1H), 3.09 (dd, *J* = 11.0, 5.0 Hz, 1H), 2.33 – 2.28 (m, 1H), 1.71 – 1.66 (m, 1H), 1.52 (s, 3H) ppm.

**<sup>13</sup>C NMR (126 MHz, CDCl<sub>3</sub>):** δ 191.5, 167.2, 154.5 (dd, *J* = 296.0, 291.9 Hz), 147.5, 139.4 (t, *J* = 4.4 Hz), 137.9, 137.8, 135.3, 133.8, 132.6, 130.1, 129.2, 128.9, 128.6 (t, *J* = 3.4 Hz), 125.9, 125.2, 124.4, 123.0, 117.5, 89.0 (dd, *J* = 21.9, 12.9 Hz), 74.9, 47.5, 31.2, 26.9 ppm.

$^{19}\text{F}$  NMR (471 MHz,  $\text{CDCl}_3$ ):  $\delta$  -84.9 (d,  $J = 29.2$  Hz), -86.5 (dd,  $J = 29.2, 3.8$  Hz) ppm.

HRMS ( $\text{ESI}^+$ ):  $m/z$ :  $[\text{M}+\text{Na}]^+$  calcd for:  $\text{C}_{26}\text{H}_{19}\text{F}_2\text{NNaO}_2^+$  438.1276, found 438.1274.

$[\alpha]_D^{25} = 136.0^\circ$  ( $c = 0.50$  in  $\text{CHCl}_3$ ). The enantiomeric excess was determined by HPLC: e.r. = 98.9:1.1 (Chiralpak AD-H, *i*-propanol/hexane = 15/85, flow rate 1.0 mL/min,  $\lambda = 254$  nm);  $t_{\text{major}} = 28.526$  min,  $t_{\text{minor}} = 26.274$  min.

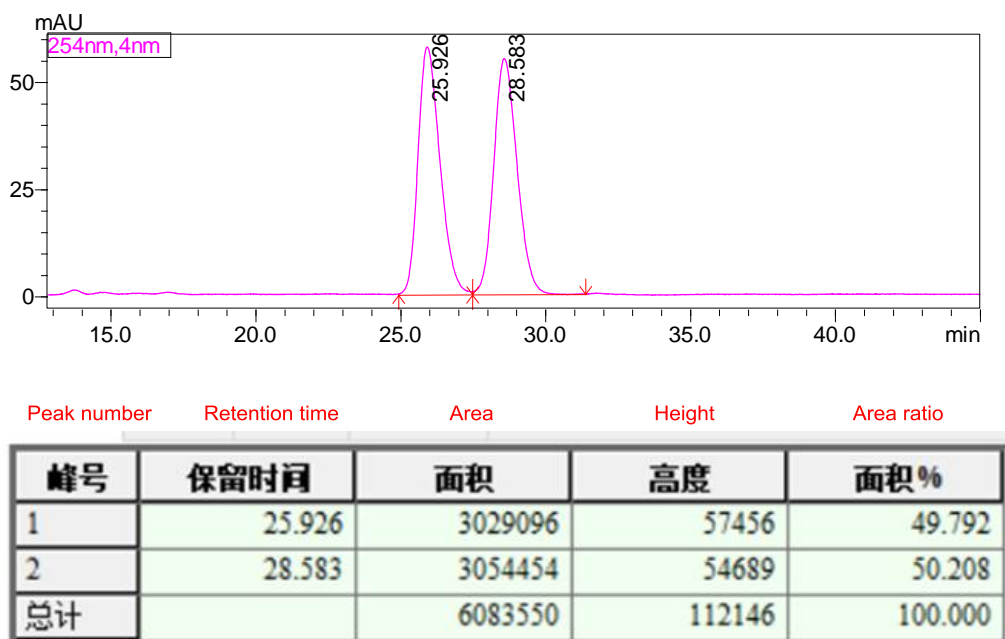

Figure S41. HPLC chromatography of the racemic product **23**

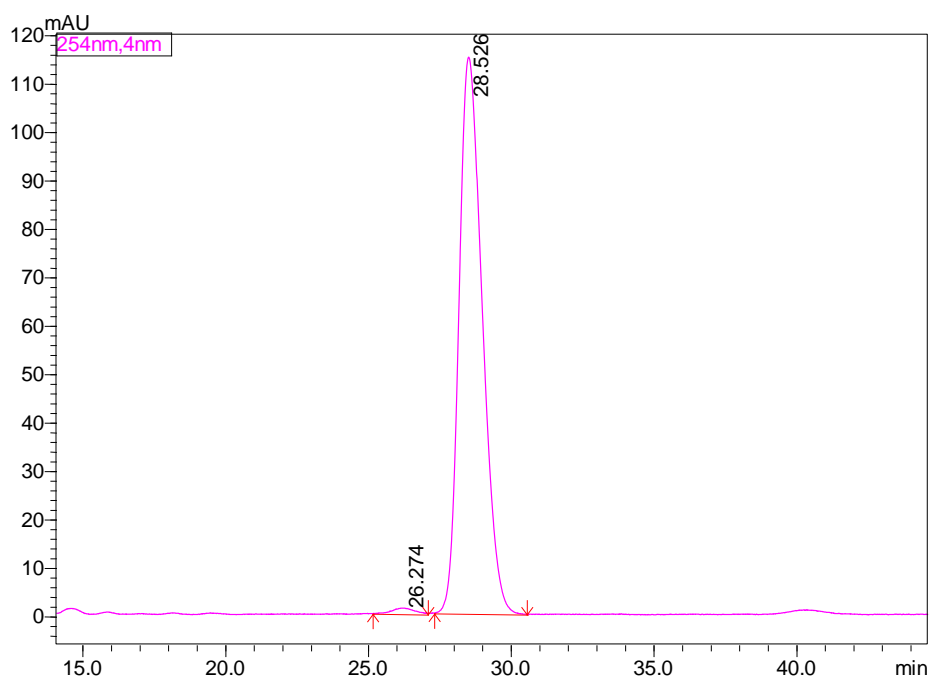



| Peak number | Retention time | Area    | Height | Area ratio |
|-------------|----------------|---------|--------|------------|
| 峰号          | 保留时间           | 面积      | 高度     | 面积%        |
| 1           | 26.274         | 69143   | 1248   | 1.057      |
| 2           | 28.526         | 6473437 | 114378 | 98.943     |
| 总计          |                | 6542580 | 115626 | 100.000    |

Figure S42. HPLC chromatography of chiral product **23**

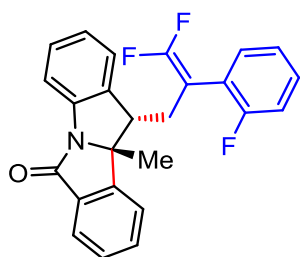

**(10bR,11S)-11-(3,3-Difluoro-2-(2-fluorophenyl)allyl)-10b-methyl-10b,11-dihydro-6H-isoindolo[2,1-a]indol-6-one, **24****

This compound was prepared according to the general procedure **3.2**. Purification by column chromatography on silica gel (Petroleum ether/Ethyl acetate = 5/1, v/v) afforded **24** as colorless oil (33.7 mg, 0.083 mmol, 42% yield).

**<sup>1</sup>H NMR (500 MHz, CDCl<sub>3</sub>):** δ 7.93 (d, *J* = 7.5 Hz, 1H), 7.73 (d, *J* = 8.0 Hz, 1H), 7.66 (t, *J* = 7.5 Hz, 1H), 7.54 (t, *J* = 7.5 Hz, 1H), 7.49 (d, *J* = 7.5 Hz, 1H), 7.35 (t, *J* = 7.5 Hz, 2H), 7.29 (d, *J* = 7.5 Hz, 1H), 7.22 – 7.14 (m, 3H), 7.11 (t, *J* = 7.5 Hz, 1H), 2.97 (dd, *J* = 10.5, 5.0 Hz, 1H), 2.23 – 2.18 (m, 1H), 1.72 – 1.67 (m, 1H), 1.48 (s, 3H) ppm.

**<sup>13</sup>C NMR (126 MHz, CDCl<sub>3</sub>):** δ 167.3, 160.3 (d, *J* = 248.5 Hz), 153.7 (t, *J* = 291.3 Hz), 147.7, 138.5, 137.7, 133.8, 132.5, 130.6, 130.0 (d, *J* = 8.3 Hz), 129.0, 128.7, 125.9 (d, *J* = 2.8 Hz), 125.0, 124.7 (d, *J* = 3.5 Hz), 124.6, 123.2, 120.6 (*J* = 14.1 Hz), 117.3, 116.4 (d, *J* = 22.7 Hz), 84.1 (dd, *J* = 24.4, 17.0 Hz), 75.0, 47.6, 32.3, 27.1 ppm.

**<sup>19</sup>F NMR (471 MHz, CDCl<sub>3</sub>):** δ -85.8 (dd, *J* = 31.6, 15.5 Hz), -88.6 (d, *J* = 31.6 Hz), -112.7 (m) ppm.

**HRMS (ESI<sup>+</sup>):** *m/z*: [M+Na]<sup>+</sup> calcd for C<sub>25</sub>H<sub>18</sub>F<sub>3</sub>NNaO<sup>+</sup> 428.1233, found 428.1233.

[α]<sub>D</sub><sup>25</sup> = 88.8 (c = 0.50 in CHCl<sub>3</sub>). The enantiomeric excess was determined by HPLC: e.r. = 98.4:1.6 (Chiralpak ID, *i*-propanol/hexane = 10/90, flow rate 1.0 mL/min, λ = 254 nm); *t*<sub>major</sub> = 14.327 min, *t*<sub>minor</sub> = 10.543 min.

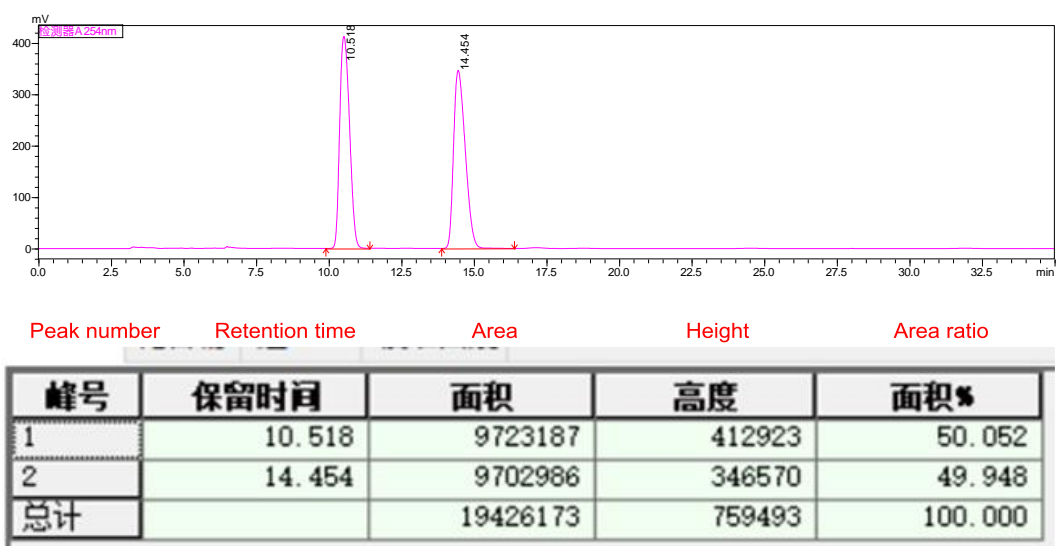

Figure S43. HPLC chromatography of the racemic product 24

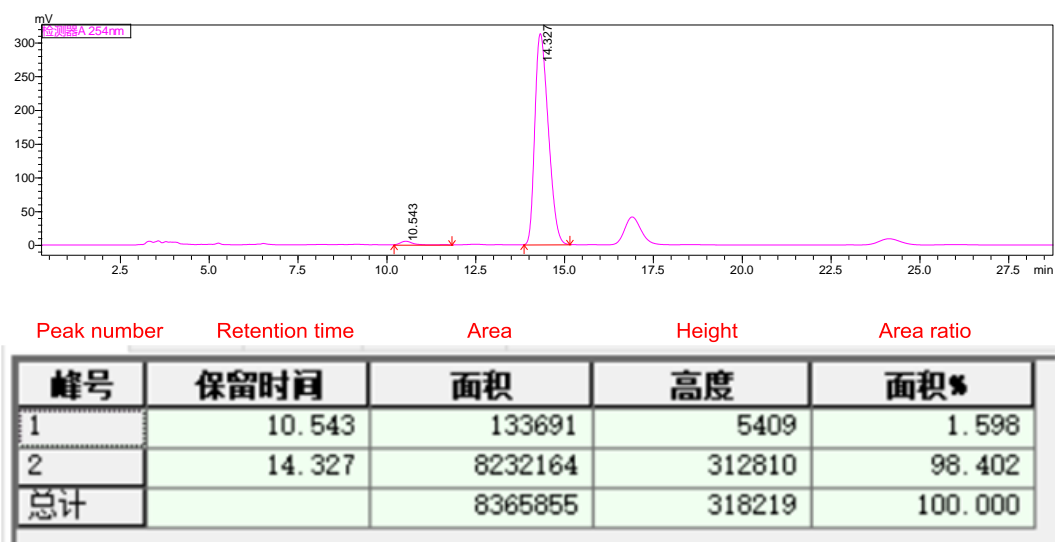

Figure S44. HPLC chromatography of chiral product 24

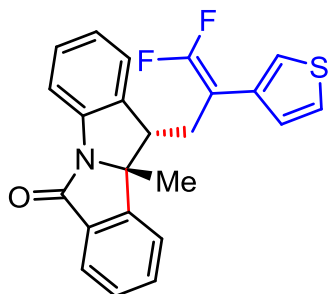

(10bR,11S)-11-(3,3-Difluoro-2-(thiophen-3-yl)allyl)-10b-methyl-10b,11-dihydro-6H-isoindolo[2,1-a]indol-6-one, 25

This compound was prepared according to the general procedure **3.2**. Purification by column chromatography on silica gel (Petroleum ether/Ethyl acetate = 7/1, v/v) afforded **25** as a white solid (41.2 mg, 0.105 mmol, 52% yield). **m.p.** 57.0 – 59.0 °C.

**<sup>1</sup>H NMR (500 MHz, CDCl<sub>3</sub>):** δ 7.95 (d, *J* = 7.5 Hz, 1H), 7.73 (d, *J* = 8.0 Hz, 1H), 7.68 (t, *J* = 7.5 Hz, 1H), 7.57 – 7.53 (m, 2H), 7.36 – 7.33 (m, 2H), 7.07 – 7.03 (m, 4H), 3.22 (dd, *J* = 11.0, 4.5 Hz, 1H), 2.23 – 2.18 (m, 1H), 1.57 – 1.56 (m, 4H) ppm.

**<sup>13</sup>C NMR (126 MHz, CDCl<sub>3</sub>):** δ 167.3, 154.5 (dd, *J* = 294.3, 289.2 Hz), 147.8, 138.2, 137.8, 133.9, 133.2 (t, *J* = 4.0 Hz), 132.6, 129.1, 128.8, 126.7 (dd, *J* = 5.9, 2.0 Hz), 126.22, 126.16, 125.2, 124.4, 123.0, 122.1 (t, *J* = 5.0 Hz), 117.4, 85.6 (dd, *J* = 23.6, 14.1 Hz), 75.1, 47.8, 31.3, 27.0 ppm.

**<sup>19</sup>F NMR (471 MHz, CDCl<sub>3</sub>):** δ -86.0 (d, *J* = 34.9 Hz), -89.4 (d, *J* = 35.3 Hz) ppm.

**HRMS (ESI<sup>+</sup>):** *m/z*: [M+Na]<sup>+</sup> calcd for C<sub>23</sub>H<sub>17</sub>F<sub>2</sub>NNaOS<sup>+</sup> 416.0891, found 416.0889.

[α]<sub>D</sub><sup>25</sup> = 169.6° (c = 0.50 in CHCl<sub>3</sub>). The enantiomeric excess was determined by HPLC: e.r. = 94.5:5.5 (Chiralpak AD-H, *i*-propanol/hexane = 5/95, flow rate 1.0 mL/min, λ = 254 nm); *t*<sub>major</sub> = 23.815 min, *t*<sub>minor</sub> = 13.670 min.

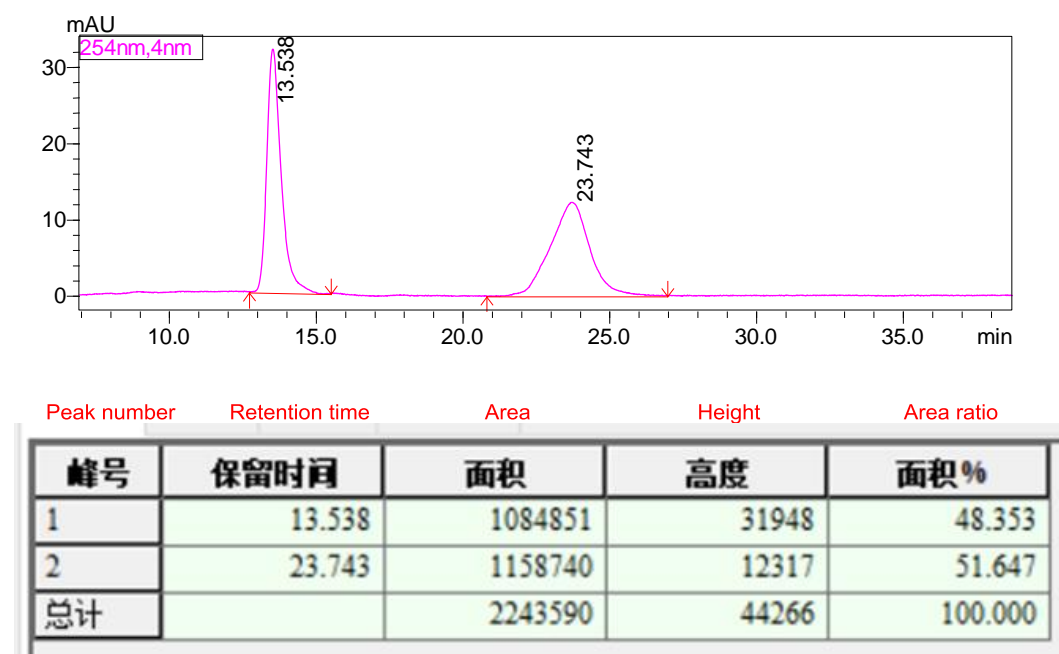

**Figure S45.** HPLC chromatography of the racemic product **25**

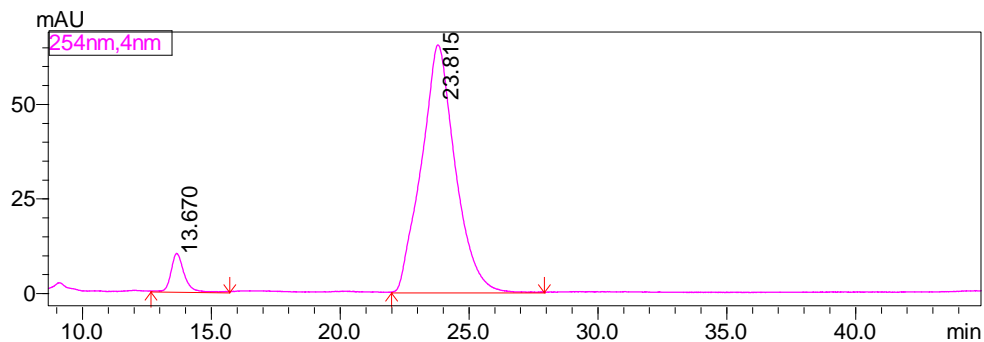

| Peak number | Retention time | Area    | Height | Area ratio |
|-------------|----------------|---------|--------|------------|
| 峰号          | 保留时间           | 面积      | 高度     | 面积%        |
| 1           | 13.670         | 346615  | 10098  | 5.503      |
| 2           | 23.815         | 5952358 | 65395  | 94.497     |
| 总计          |                | 6298973 | 75493  | 100.000    |

**Figure S46.** HPLC chromatography of chiral product **25**

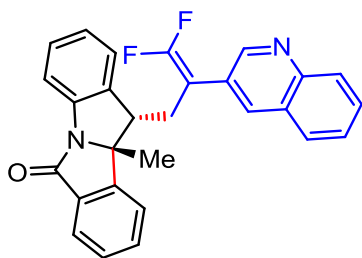

**(10bR,11S)-11-(3,3-Difluoro-2-(quinolin-3-yl)allyl)-10b-methyl-10b,11-dihydro-6H-isoindolo[2,1-a]indol-6-one, 26**

This compound was prepared according to the general procedure **3.2**. Purification by column chromatography on silica gel (Petroleum ether/Ethyl acetate = 5/1 to 3/1, v/v) afforded **26** as a white solid (49.1 mg, 0.112 mmol, 56% yield). **m.p.** 57.7 – 58.3 °C.

**<sup>1</sup>H NMR (500 MHz, CDCl<sub>3</sub>):** δ 8.85 (t, *J* = 2.0 Hz, 1H), 8.11 (d, *J* = 8.5 Hz, 1H), 7.95 (d, *J* = 7.5 Hz, 1H), 7.82 – 7.79 (m, 2H), 7.76 – 7.74 (m, 2H), 7.70 (t, *J* = 7.5, 1.5 Hz, 1H), 7.61 – 7.53 (m, 3H), 7.34 (td, *J* = 7.5, 1.0 Hz, 1H), 7.19 (d, *J* = 7.5 Hz, 1H), 7.07 (t, *J* = 7.5 Hz, 1H), 3.15 (dd, *J* = 11.0, 5.0 Hz, 1H), 2.42 – 2.37 (m, 1H), 1.79 – 1.74 (m, 1H), 1.52 (s, 3H) ppm.

**<sup>13</sup>C NMR (126 MHz, CDCl<sub>3</sub>):** δ 167.2, 154.7 (dd, *J* = 294.5, 292.4 Hz), 149.6, 147.5, 147.1, 138.0, 137.9, 134.9 (t, *J* = 2.9 Hz), 133.8, 132.7, 130.1, 129.3, 129.2, 129.0, 128.0, 127.7, 127.4, 126.2 (t, *J* = 4.0 Hz), 125.9, 125.2, 124.5, 123.0, 117.6, 86.9 (dd, *J* = 22.6, 14.0 Hz), 75.0, 47.6, 31.4, 26.9 ppm.

$^{19}\text{F}$  NMR (471 MHz,  $\text{CDCl}_3$ ):  $\delta$  -85.7 (d,  $J = 32.0$  Hz), -87.7 (dd,  $J = 32.0, 1.4$  Hz) ppm.

HRMS (ESI<sup>+</sup>):  $m/z$ :  $[\text{M}+\text{H}]^+$  calcd for  $\text{C}_{28}\text{H}_{21}\text{F}_2\text{N}_2\text{O}^+$  439.1616, found 439.1614.

$[\alpha]_D^{25} = 64.0^\circ$  ( $c = 0.50$  in  $\text{CHCl}_3$ ). The enantiomeric excess was determined by HPLC: e.r. = 98.4:1.6 (Chiralpak AD-H, *i*-propanol/hexane = 30/70, flow rate 1.0 mL/min,  $\lambda = 254$  nm);  $t_{\text{major}} = 15.539$  min,  $t_{\text{minor}} = 9.394$  min.

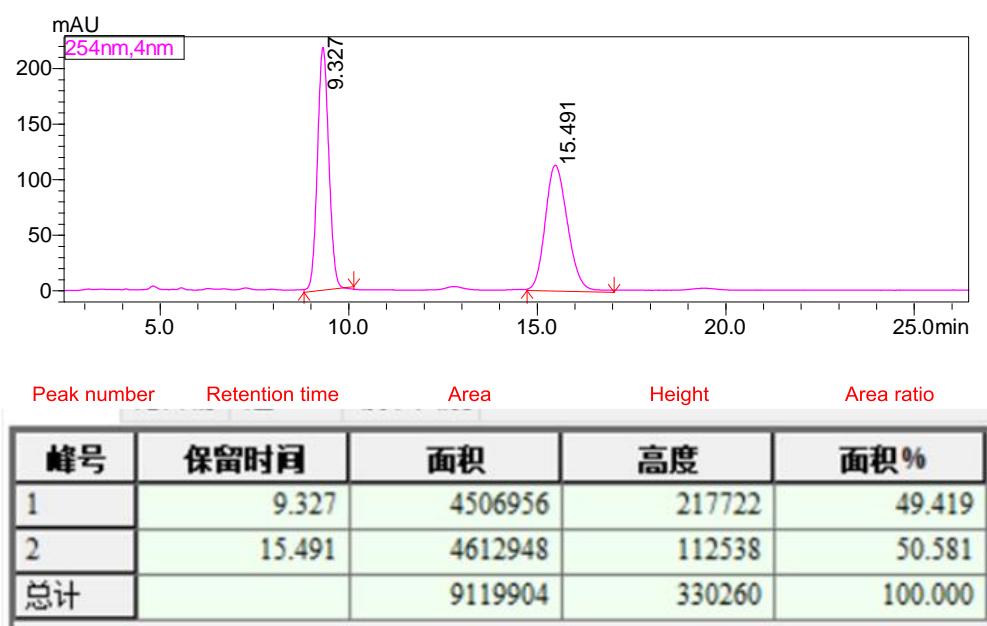

Figure S47. HPLC chromatography of the racemic product **26**

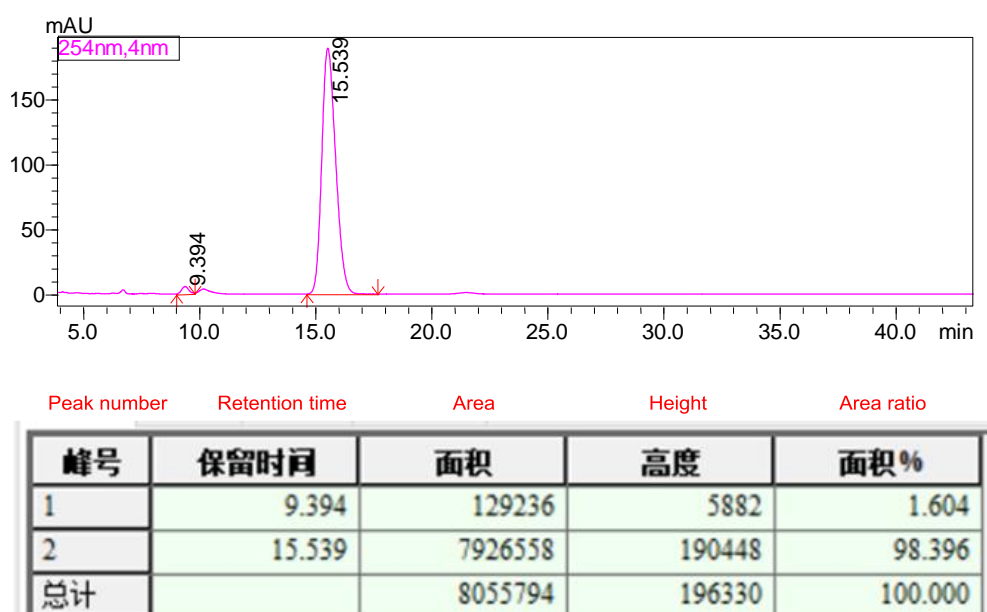

Figure S48. HPLC chromatography of chiral product **26**

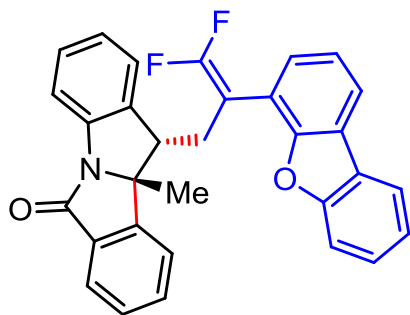

**(10bR,11S)-11-(2-(Dibenzo[*b,d*]furan-4-yl)-3,3-difluoroallyl)-10b-methyl-10b,11-dihydro-6H-isoindolo[2,1-*a*]indol-6-one, **27****

This compound was prepared according to the general procedure **3.2**. Purification by column chromatography on silica gel (Petroleum ether/Ethyl acetate = 7/1, v/v) afforded **27** as a white solid (50.3 mg, 0.105 mmol, 53% yield). **m.p.** 63.8 – 65.7 °C.

**<sup>1</sup>H NMR (500 MHz, CDCl<sub>3</sub>):** δ 8.02 – 7.95 (m, 3H), 7.74 – 7.66 (m, 3H), 7.57 – 7.50 (m, 3H), 7.44 – 7.40 (m, 2H), 7.37 – 7.33 (m, 3H), 7.11 (t, *J* = 7.5 Hz, 1H), 2.95 (dd, *J* = 10.0, 5.0 Hz, 1H), 2.61 – 2.56 (m, 1H), 1.95 – 1.90 (m, 1H), 1.40 (s, 3H) ppm.

**<sup>13</sup>C NMR (126 MHz, CDCl<sub>3</sub>):** δ 167.4, 156.0, 154.0 (dd, *J* = 291.6, 289.7 Hz), 153.8 (t, *J* = 1.1 Hz), 147.8, 138.7, 137.8, 133.8, 132.4, 129.0, 128.6, 127.8, 127.7, 126.0, 125.1, 124.5, 124.1, 123.35, 123.29, 123.2, 121.0, 120.6, 117.46 – 117.40 (m, 1C), 117.3, 111.7, 85.5 (dd, *J* = 24.3, 16.0 Hz), 75.0, 47.7, 31.7, 27.1 ppm.

**<sup>19</sup>F NMR (471 MHz, CDCl<sub>3</sub>):** δ -85.9 (dd, *J* = 31.6, 3.8 Hz), -88.6 (d, *J* = 31.6 Hz) ppm.

**HRMS (ESI<sup>+</sup>):** *m/z*: [M+Na]<sup>+</sup> calcd for C<sub>31</sub>H<sub>21</sub>F<sub>2</sub>NNaO<sub>2</sub><sup>+</sup> 500.1433, found 500.1436.

[α]<sub>D</sub><sup>25</sup> = 89.6° (c = 0.50 in CHCl<sub>3</sub>). The enantiomeric excess was determined by HPLC: e.r. = 97.2:2.8 (Chiralpak AD-H, *i*-propanol/hexane = 5/95, flow rate 1.0 mL/min, λ = 254 nm); *t*<sub>major</sub> = 23.523 min, *t*<sub>minor</sub> = 11.431 min.

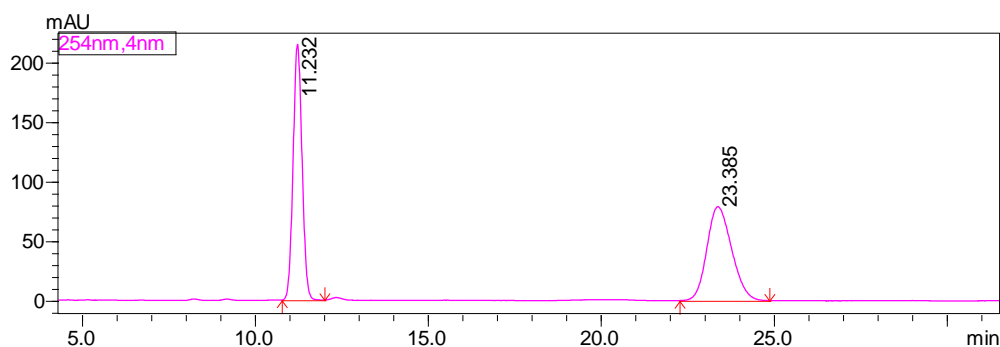

| Peak number | Retention time | Area    | Height | Area ratio |
|-------------|----------------|---------|--------|------------|
| 峰号          | 保留时间           | 面积      | 高度     | 面积%        |
| 1           | 11.232         | 3900317 | 215878 | 49.673     |
| 2           | 23.385         | 3951597 | 79251  | 50.327     |
| 总计          |                | 7851914 | 295129 | 100.000    |

Figure S49. HPLC chromatography of the racemic product **27**

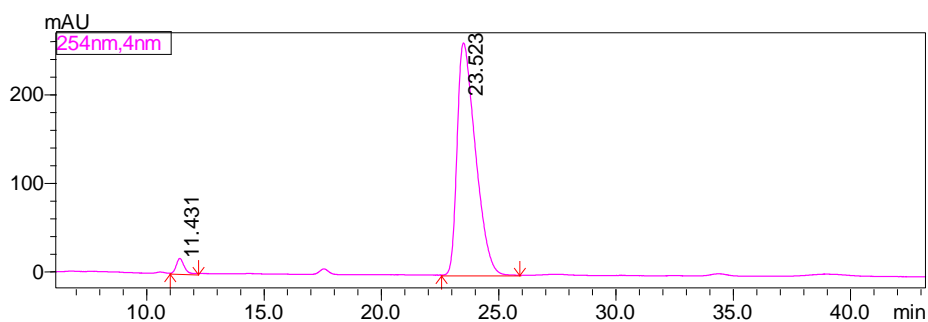

| Peak number | Retention time | Area     | Height | Area ratio |
|-------------|----------------|----------|--------|------------|
| 峰号          | 保留时间           | 面积       | 高度     | 面积%        |
| 1           | 11.431         | 418832   | 17548  | 2.846      |
| 2           | 23.523         | 14298153 | 263868 | 97.154     |
| 总计          |                | 14716985 | 281416 | 100.000    |

Figure S50. HPLC chromatography of chiral product **27**

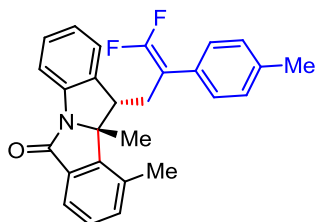

**(10bR,11S)-11-(3,3-Difluoro-2-(*p*-tolyl)allyl)-10,10b-dimethyl-10b,11-dihydro-6H-isoindolo[2,1-*a*]indol-6-one, **28****

This compound was prepared according to the general procedure **3.2**. Purification by column chromatography on silica gel (Petroleum ether/Ethyl acetate = 7/1, v/v) afforded **28** as a yellow solid (41.2 mg, 0.099 mmol, 50% yield). **m.p.** 42.4 – 43.3 °C.

**<sup>1</sup>H NMR (500 MHz, CDCl<sub>3</sub>):** δ 7.79 (dd, *J* = 7.0, 1.5 Hz, 1H), 7.74 (d, *J* = 7.5 Hz, 1H), 7.47 – 7.42 (m, 2H), 7.35 (td, *J* = 7.5, 1.0 Hz, 1H), 7.22 (d, *J* = 8.0 Hz, 2H), 7.19 – 7.16 (m, 3H), 7.09 (td, *J* = 7.5, 1.0 Hz, 1H), 3.11 (dd, *J* = 12.0, 3.5 Hz, 1H), 2.49 (s, 3H), 2.37 (s, 3H), 2.17 – 2.12 (m, 1H), 1.62 – 1.56 (m, 1H), 1.51 (s, 3H) ppm.

$^{13}\text{C}$  NMR (126 MHz,  $\text{CDCl}_3$ ):  $\delta$  166.6, 154.2 (dd,  $J = 291.9, 289.2$  Hz), 145.6, 138.1, 137.5, 137.2, 134.4, 134.3, 132.6, 129.9 (t,  $J = 3.8$  Hz), 129.6, 129.3, 128.7, 128.1 (t,  $J = 3.2$  Hz), 126.1, 124.2, 122.8, 117.2, 88.7 (dd,  $J = 21.3, 14.6$  Hz), 75.3, 46.8 (t,  $J = 2.4$  Hz), 31.3, 24.8, 21.3, 19.0 ppm.

$^{19}\text{F}$  NMR (471 MHz,  $\text{CDCl}_3$ ):  $\delta$  -89.3 (d,  $J = 38.2$  Hz), -90.4 (dd,  $J = 38.2, 5.2$  Hz) ppm.

HRMS (ESI<sup>+</sup>):  $m/z$ :  $[\text{M}+\text{Na}]^+$  calcd for  $\text{C}_{27}\text{H}_{23}\text{F}_2\text{NNaO}^+$  438.1640, found 438.1640.

$[\alpha]_D^{25} = 105.6^\circ$  ( $c = 0.50$  in  $\text{CHCl}_3$ ). The enantiomeric excess was determined by HPLC: e.r. = 98.0:1.8 (Chiralpak ID, *i*-propanol/hexane = 10/90, flow rate 1.0 mL/min,  $\lambda = 254$  nm);  $t_{\text{major}} = 22.787$  min,  $t_{\text{minor}} = 28.379$  min

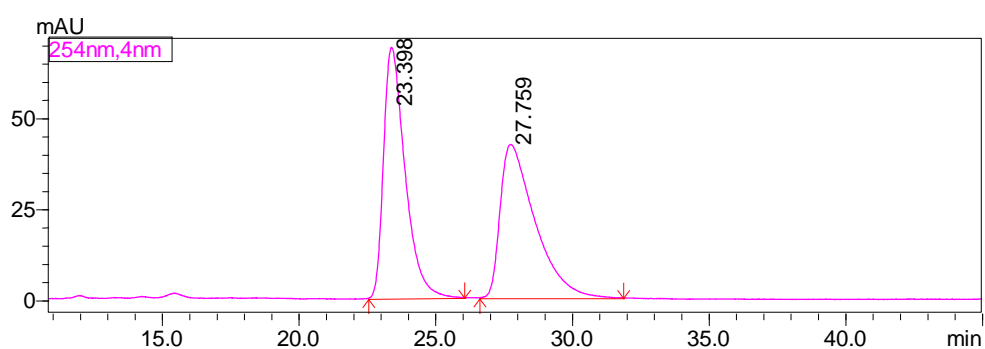

| Peak number | Retention time | Area    | Height | Area ratio |
|-------------|----------------|---------|--------|------------|
| 峰号          | 保留时间           | 面积      | 高度     | 面积%        |
| 1           | 23.398         | 3785170 | 69101  | 50.297     |
| 2           | 27.759         | 3740511 | 42274  | 49.703     |
| 总计          |                | 7525681 | 111375 | 100.000    |

Figure S51. HPLC chromatography of the racemic product **28**

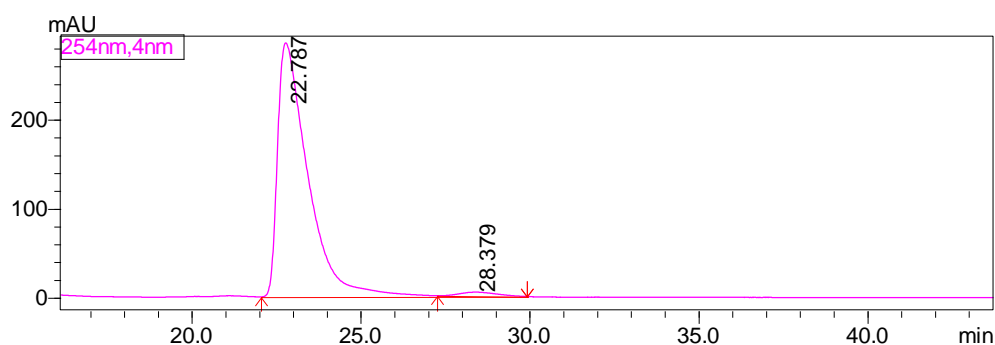



| Peak number | Retention time | Area     | Height | Area ratio |
|-------------|----------------|----------|--------|------------|
| 峰号          | 保留时间           | 面积       | 高度     | 面积%        |
| 1           | 22.787         | 17934801 | 286052 | 98.167     |
| 2           | 28.379         | 334888   | 4427   | 1.833      |
| 总计          |                | 18269689 | 290478 | 100.000    |

Figure S52. HPLC chromatography of chiral product **28**

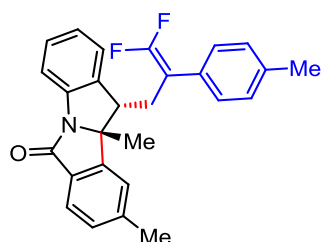

**(10bR,11S)-11-(3,3-Difluoro-2-(*p*-tolyl)allyl)-9,10b-dimethyl-10b,11-dihydro-6H-isoindolo[2,1-*a*]indol-6-one, **29****

This compound was prepared according to the general procedure **3.2**. Purification by column chromatography on silica gel (Petroleum ether/Ethyl acetate = 7/1, v/v) afforded **29** as a yellow solid (46.3 mg, 0.111 mmol, 56% yield). **m.p.** 42.4 – 43.3 °C.

**<sup>1</sup>H NMR (500 MHz, CDCl<sub>3</sub>):** δ 7.81 (d, *J* = 8.0 Hz, 1H), 7.71 (d, *J* = 8.0 Hz, 1H), 7.34 (t, *J* = 7.5 Hz, 2H), 7.29 (s, 1H), 7.24 (d, *J* = 8.0 Hz, 2H), 7.19 – 7.15 (m, 3H), 7.07 (td, *J* = 7.5, 1.0 Hz, 1H), 3.05 (dd, *J* = 10.5, 5.0 Hz, 1H), 2.55 (s, 3H), 2.38 (s, 3H), 2.25 – 2.19 (m, 1H), 1.68 – 1.63 (m, 1H), 1.46 (s, 3H) ppm.

**<sup>13</sup>C NMR (126 MHz, CDCl<sub>3</sub>):** δ 167.5, 154.0 (dd, *J* = 291.7, 289.2 Hz), 148.1, 143.3, 138.4, 137.9, 137.5, 131.3, 130.1, 129.8 (t, *J* = 3.8 Hz), 129.7, 128.6, 128.0 (t, *J* = 3.3 Hz), 125.9, 124.9, 124.3, 123.5, 117.3, 88.8 (dd, *J* = 21.0, 14.2 Hz), 74.8, 47.2, 31.6, 27.0, 22.2, 21.3 ppm.

**<sup>19</sup>F NMR (471 MHz, CDCl<sub>3</sub>):** δ -89.1 (d, *J* = 38.2 Hz), -90.2 (d, *J* = 37.7 Hz) ppm.

**HRMS (ESI<sup>+</sup>):** *m/z*: [M+H]<sup>+</sup> calcd for C<sub>27</sub>H<sub>24</sub>F<sub>2</sub>NO<sup>+</sup> 416.1820, found 416.1826.

[α]<sub>D</sub><sup>25</sup> = 63.2° (c = 0.50 in CHCl<sub>3</sub>). The enantiomeric excess was determined by HPLC: e.r. = 95.9:4.1 (Chiralpak AD-H, *i*-propanol/hexane = 5/95, flow rate 1.0 mL/min, λ = 254 nm); *t*<sub>major</sub> = 20.974 min, *t*<sub>minor</sub> = 9.358 min.

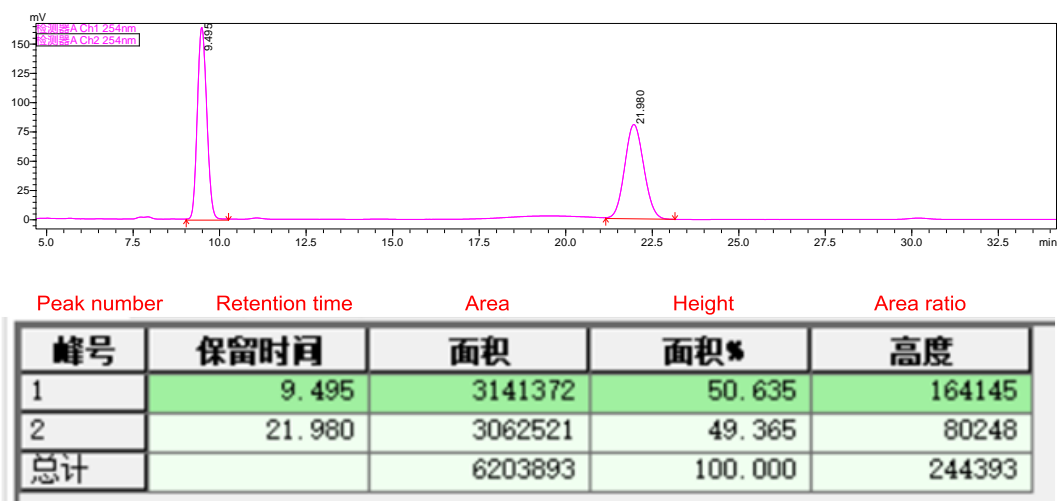

Figure S53. HPLC chromatography of the racemic product **29**

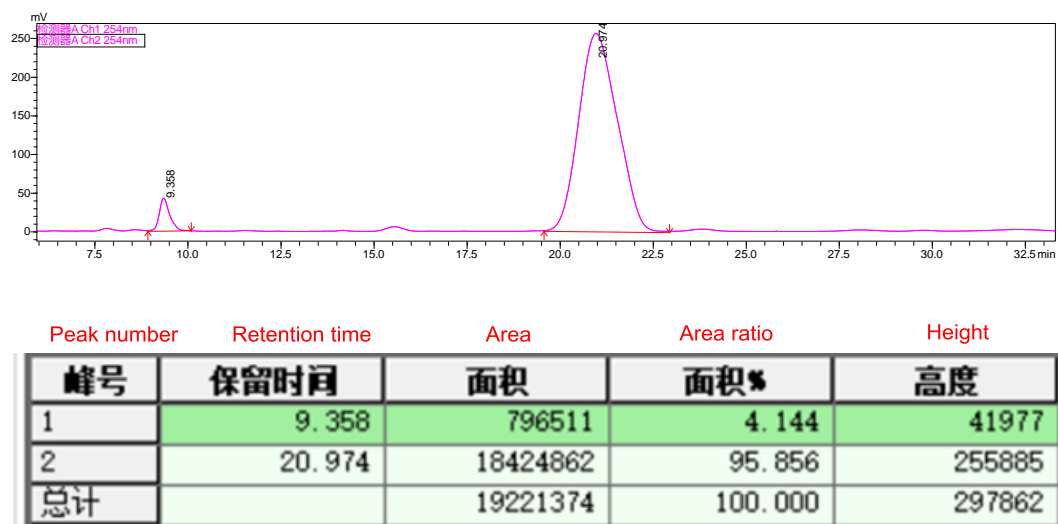

Figure S54. HPLC chromatography of chiral product **29**

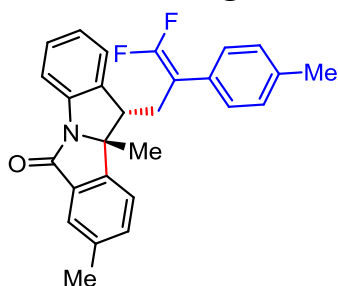

(10*b**R*,11*S*)-11-(3,3-Difluoro-2-(*p*-tolyl)allyl)-8,10*b*-dimethyl-10*b*,11-dihydro-6*H*-isoindolo[2,1-*a*]indol-6-one, **30**

This compound was prepared according to the general procedure **3.2**. Purification by column chromatography on silica gel (Petroleum ether/Ethyl acetate = 7/1, v/v) afforded **30** as a yellow solid (49.3 mg, 0.119 mmol, 59% yield). **m.p.** 81.3 – 85.5 °C.

**<sup>1</sup>H NMR (500 MHz, CDCl<sub>3</sub>):** δ 7.81 (d, *J* = 7.5 Hz, 1H), 7.71 (d, *J* = 8.0 Hz, 1H), 7.35 – 7.32 (m, 2H), 7.29 (s, 1H), 7.24 (d, *J* = 8.5 Hz, 2H), 7.19 – 7.15 (m, 3H), 7.08 (td, *J* = 7.0, 1.0 Hz, 1H), 3.05 (dd, *J* = 10.5, 5.0 Hz, 1H), 2.55 (s, 3H), 2.39 (s, 3H), 2.25 – 2.19 (m, 1H), 1.68 – 1.63 (m, 1H), 1.47 (s, 3H) ppm.

**<sup>13</sup>C NMR (126 MHz, CDCl<sub>3</sub>):** δ 167.5, 154.0 (dd, *J* = 292.1, 289.2 Hz), 148.2, 143.3, 138.4, 138.0, 137.5, 131.3, 130.0, 129.8 (t, *J* = 3.9 Hz), 129.7, 128.6, 128.0 (t, *J* = 3.4 Hz), 125.9, 124.8, 124.2, 123.6, 117.3, 88.8 (dd, *J* = 21.0, 14.1 Hz), 74.7, 47.2, 31.6, 27.0, 22.2, 21.3 ppm.

**<sup>19</sup>F NMR (471 MHz, CDCl<sub>3</sub>):** δ -89.1 (d, *J* = 37.7 Hz), -90.2 (dd, *J* = 38.2, 3.8 Hz) ppm.

**HRMS (ESI<sup>+</sup>):** *m/z*: [M+Na]<sup>+</sup> calcd for C<sub>27</sub>H<sub>23</sub>F<sub>2</sub>NNaO<sup>+</sup> 438.1640, found 438.1648.

[α]<sub>D</sub><sup>25</sup> = 180.0° (c = 0.50 in CHCl<sub>3</sub>). The enantiomeric excess was determined by HPLC: e.r. = 96.7:3.3 (Chiralpak AD-H, *i*-propanol/hexane = 5/95, flow rate 1.0 mL/min, λ = 254 nm); *t*<sub>major</sub> = 19.669 min, *t*<sub>minor</sub> = 8.924 min.

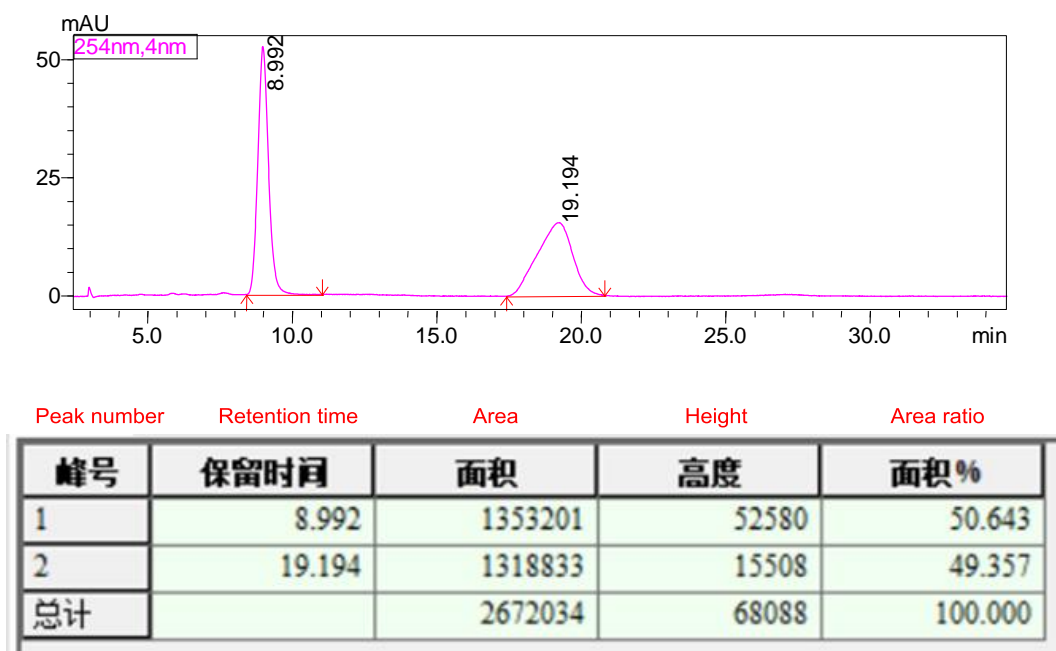

**Figure S55.** HPLC chromatography of the racemic product **30**

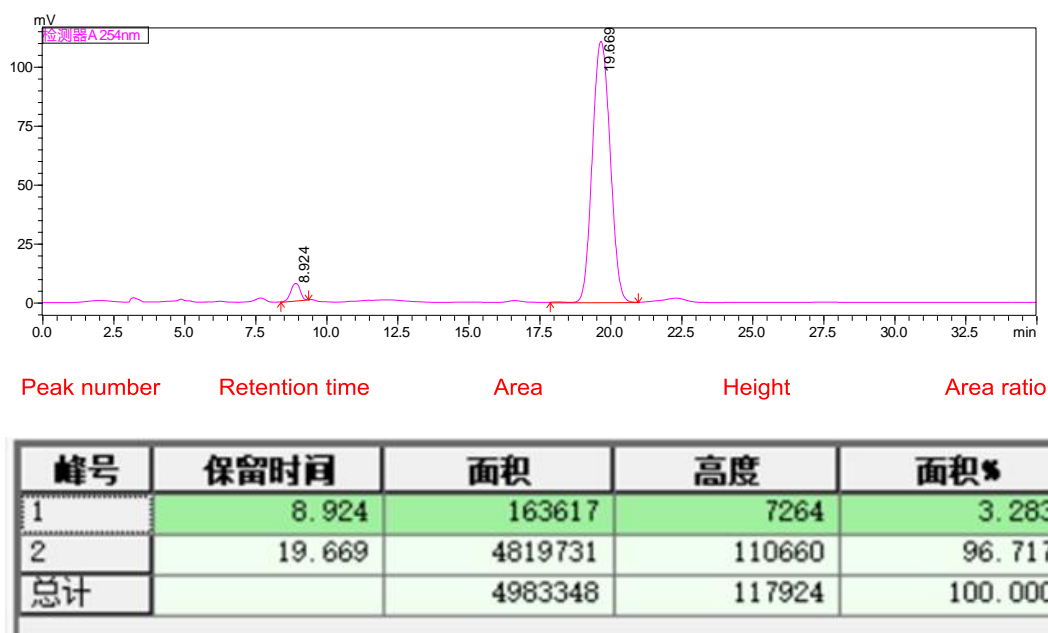

**Figure S56.** HPLC chromatography of chiral product **30**

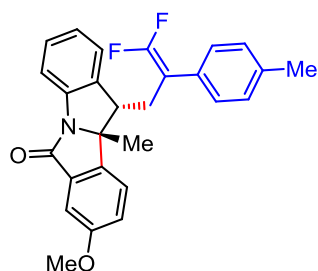

**(10bR,11S)-11-(3,3-Difluoro-2-(*p*-tolyl)allyl)-8-methoxy-10b-methyl-10b,11-dihydro-6*H*-isoindolo[2,1-*a*]indol-6-one, **31****

This compound was prepared according to the general procedure **3.2**. Purification by column chromatography on silica gel (Petroleum ether/Ethyl acetate = 6/1, v/v) afforded **31** as a yellow solid (48.1 mg, 0.111 mmol, 56% yield). **m.p.** 54.4 – 56.2 °C.

**<sup>1</sup>H NMR (500 MHz, CDCl<sub>3</sub>):** δ 7.72 (d, *J* = 7.5 Hz, 1H), 7.40 (d, *J* = 2.5 Hz, 1H), 7.38 (d, *J* = 8.5 Hz, 1H), 7.35 (td, *J* = 7.5, 1.0 Hz, 1H), 7.24 – 7.22 (m, 3H), 7.19 – 7.16 (m, 3H), 7.09 (td, *J* = 7.5, 1.0 Hz, 1H), 3.89 (s, 3H), 3.02 (dd, *J* = 10.5, 5.0 Hz, 1H), 2.38 (s, 3H), 2.22 – 2.17 (m, 1H), 1.66 – 1.61 (m, 1H), 1.46 (s, 3H) ppm.

**<sup>13</sup>C NMR (126 MHz, CDCl<sub>3</sub>):** δ 167.3, 160.6, 154.0 (dd, *J* = 292.1, 289.2 Hz), 140.0, 138.7, 137.8, 137.5, 135.2, 129.8 (t, *J* = 3.8 Hz), 129.6, 128.6, 128.0 (t, *J* = 3.3 Hz), 126.0, 124.4, 123.8, 120.9, 117.3, 107.5, 88.8 (dd, *J* = 21.0, 14.0 Hz), 74.6, 55.8, 47.3 (t, *J* = 2.6 Hz), 31.7, 27.0, 21.3 ppm.

**<sup>19</sup>F NMR (471 MHz, CDCl<sub>3</sub>):** δ -89.2 (d, *J* = 38.2 Hz), -90.2 (dd, *J* = 37.7, 3.8 Hz)

ppm.

**HRMS (ESI<sup>+</sup>):**  $m/z$ : [M+Na]<sup>+</sup> calcd for C<sub>27</sub>H<sub>23</sub>F<sub>2</sub>NaNO<sub>2</sub><sup>+</sup> 454.1589, found 454.1589.

$[\alpha]_D^{25} = 208.8^\circ$  (c = 0.50 in CHCl<sub>3</sub>). The enantiomeric excess was determined by HPLC: e.r. = 97.1:2.9 (Chiralpak ID, *i*-propanol/hexane = 10/90, flow rate 1.0 mL/min,  $\lambda = 254$  nm);  $t_{\text{major}} = 27.163$  min,  $t_{\text{minor}} = 32.959$  min.

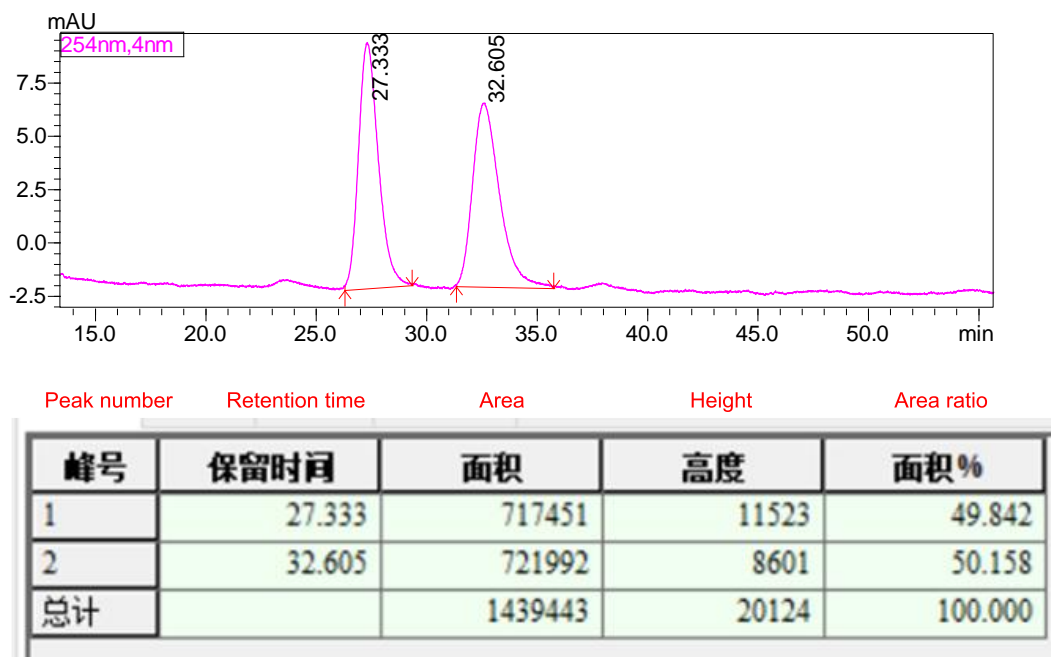

**Figure S57.** HPLC chromatography of the racemic product **31**

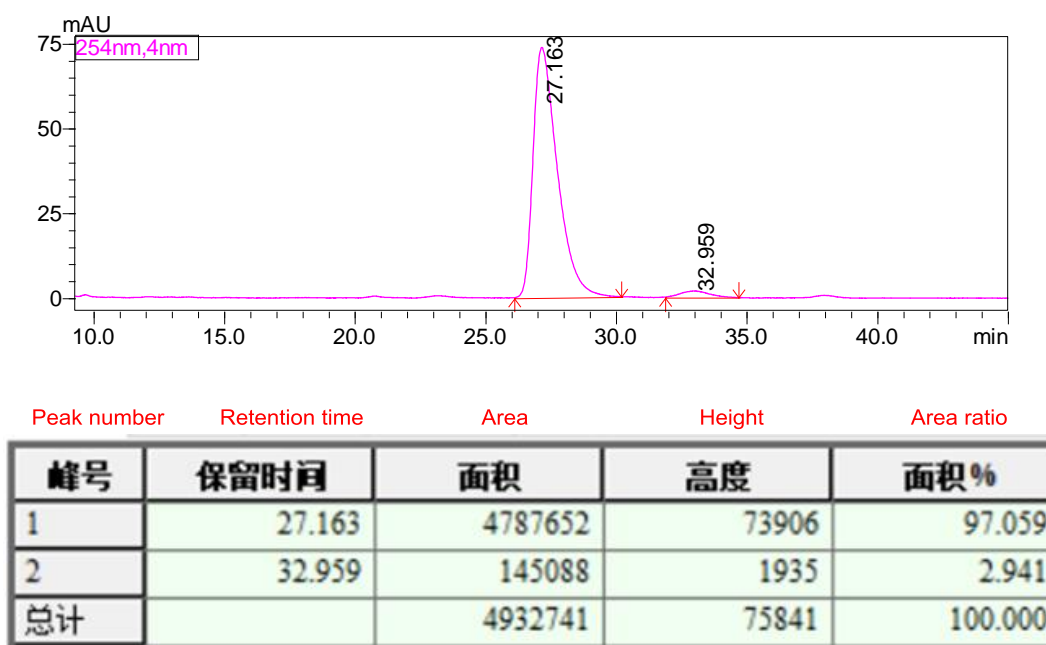

**Figure S58.** HPLC chromatography of chiral product **31**

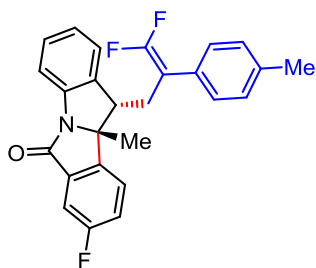

**(10bR,11S)-11-(3,3-Difluoro-2-(*p*-tolyl)allyl)-8-fluoro-10b-methyl-10b,11-dihydro-6H-isoindolo[2,1-*a*]indol-6-one, 32**

This compound was prepared according to the general procedure **3.2**. Purification by column chromatography on silica gel (Petroleum ether/Ethyl acetate = 10/1, v/v) afforded **32** as yellow oil (52.3 mg, 0.125 mmol, 62% yield).

**<sup>1</sup>H NMR (500 MHz, CDCl<sub>3</sub>):** δ 7.72 (d, *J* = 8.0 Hz, 1H), 7.60 (dd, *J* = 7.5, 2.5 Hz, 1H), 7.46 (dd, *J* = 8.5, 4.5 Hz, 1H), 7.39 – 7.34 (m, 2H), 7.24 (d, *J* = 8.0 Hz, 2H), 7.19 – 7.17 (m, 3H), 7.11 (td, *J* = 7.5, 1.5 Hz, 1H), 3.06 (dd, *J* = 10.5, 5.0 Hz, 1H), 2.39 (s, 3H), 2.20 – 2.15 (m, 1H), 1.69 – 1.63 (m, 1H), 1.48 (s, 3H) ppm.

**<sup>13</sup>C NMR (126 MHz, CDCl<sub>3</sub>):** δ 166.0 (d, *J* = 3.3 Hz), 163.4 (d, *J* = 249.4 Hz), 154.0 (dd, *J* = 292.3, 289.5 Hz), 143.3 (d, *J* = 2.6 Hz), 138.5, 137.6, 137.5, 136.1 (d, *J* = 8.4 Hz), 129.7, 128.8, 128.0 (t, *J* = 3.2 Hz), 126.0, 124.7, 124.6 (d, *J* = 8.4 Hz), 120.1, 119.9, 117.4, 111.8 (d, *J* = 23.2 Hz), 88.7 (dd, *J* = 20.9, 14.5 Hz), 74.7, 47.3 (d, *J* = 2.6 Hz), 31.7 (d, *J* = 1.3 Hz), 27.1, 21.3 ppm.

**<sup>19</sup>F NMR (471 MHz, CDCl<sub>3</sub>):** δ -89.1 (d, *J* = 37.7 Hz), -90.0 (d, *J* = 37.2 Hz), -111.7 (m) ppm.

**HRMS (ESI<sup>+</sup>):** *m/z*: [M+Na]<sup>+</sup> calcd for C<sub>26</sub>H<sub>20</sub>F<sub>3</sub>NNaO<sup>+</sup> 442.1389, found 442.1392.

[α]<sub>D</sub><sup>25</sup> = 124.8° (c = 0.50 in CHCl<sub>3</sub>). The enantiomeric excess was determined by HPLC: e.r. = 97.0:3.0 (Chiralpak ID, *i*-propanol/hexane = 10/90, flow rate 1.0 mL/min, λ = 254 nm); *t*<sub>major</sub> = 22.133 min, *t*<sub>minor</sub> = 19.141 min.

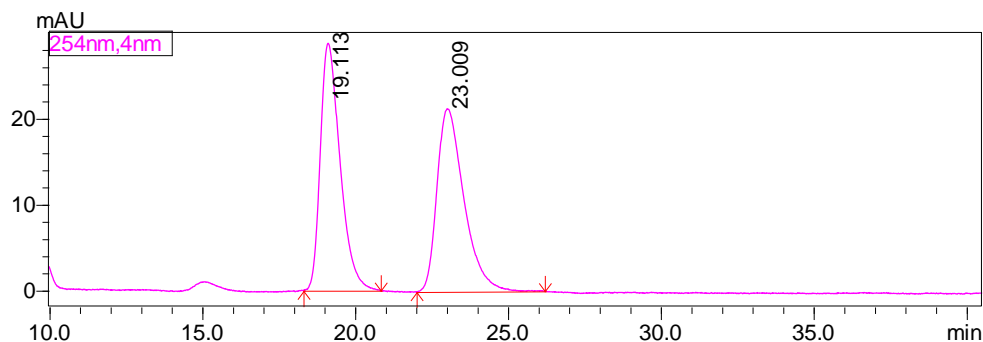

| Peak number | Retention time | Area    | Height | Area ratio |
|-------------|----------------|---------|--------|------------|
| 峰号          | 保留时间           | 面积      | 高度     | 面积%        |
| 1           | 19.113         | 1297543 | 28887  | 49.816     |
| 2           | 23.009         | 1307149 | 21372  | 50.184     |
| 总计          |                | 2604692 | 50258  | 100.000    |

Figure S59. HPLC chromatography of the racemic product **32**

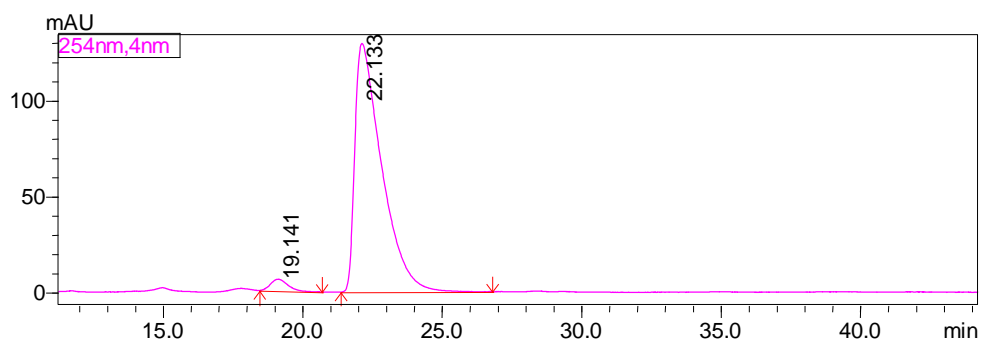

| Peak number | Retention time | Area    | Height | Area ratio |
|-------------|----------------|---------|--------|------------|
| 峰号          | 保留时间           | 面积      | 高度     | 面积%        |
| 1           | 19.141         | 265657  | 6180   | 2.965      |
| 2           | 22.133         | 8694183 | 129998 | 97.035     |
| 总计          |                | 8959840 | 136179 | 100.000    |

Figure S60. HPLC chromatography of chiral product **32**

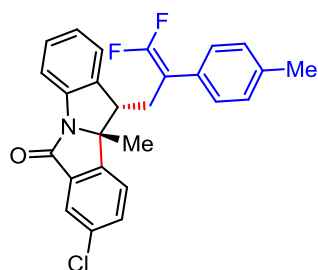

**(10bR,11S)-8-Chloro-11-(3,3-difluoro-2-(*p*-tolyl)allyl)-10b-methyl-10b,11-dihydro-6H-isoindolo[2,1-*a*]indol-6-one, **33****

This compound was prepared according to the general procedure **3.2**. Purification by column chromatography on silica gel (Petroleum ether/ Ethyl acetate = 10/1, v/v) afforded **33** as yellow oil (48.7 mg, 0.112 mmol, 56% yield).

<sup>1</sup>H NMR (500 MHz, CDCl<sub>3</sub>): δ 7.90 (d, *J* = 2.0 Hz, 1H), 7.71 (d, *J* = 7.5 Hz, 1H), 7.63 (dd, *J* = 8.0, 2.5 Hz, 1H), 7.43 (d, *J* = 8.0 Hz, 1H), 7.36 (td, *J* = 8.0, 1.5 Hz, 1H), 7.23

(d,  $J = 8.0$  Hz, 2H), 7.17 (d,  $J = 7.5$  Hz, 3H), 7.11 (td,  $J = 7.5, 1.0$  Hz, 1H), 3.06 (dd,  $J = 10.5, 5.0$  Hz, 1H), 2.39 (s, 3H), 2.20 – 2.15 (m, 1H), 1.68 – 1.63 (m, 1H), 1.47 (s, 3H) ppm.

$^{13}\text{C}$  NMR (126 MHz,  $\text{CDCl}_3$ ):  $\delta$  165.8, 154.0 (dd,  $J = 292.1, 289.2$  Hz), 145.9, 138.3, 137.6, 137.5, 135.6, 135.4, 132.6, 129.7, 129.6 (t,  $J = 3.9$  Hz), 128.8, 127.9 (t,  $J = 3.0$  Hz), 126.1, 125.2, 124.7, 124.3, 117.4, 88.7 (dd,  $J = 20.9, 14.5$  Hz), 74.8, 47.3, 31.6, 26.9, 21.3 ppm.

$^{19}\text{F}$  NMR (471 MHz,  $\text{CDCl}_3$ ):  $\delta$  -89.0 (d,  $J = 37.2$  Hz), -89.9 (d,  $J = 38.2$  Hz) ppm.

HRMS (ESI<sup>+</sup>):  $m/z$ :  $[\text{M}+\text{Na}]^+$  calcd for  $\text{C}_{26}\text{H}_{20}\text{ClF}_2\text{NNaO}^+$  458.1094, found 458.1095.

$[\alpha]_D^{25} = 89.6^\circ$  ( $c = 0.25$  in  $\text{CHCl}_3$ ). The enantiomeric excess was determined by HPLC: e.r. = 95.5:4.5 (Chiralpak AD-H, *i*-propanol/hexane = 5/95, flow rate 1.0 mL/min,  $\lambda = 254$  nm);  $t_{\text{major}} = 8.899$  min,  $t_{\text{minor}} = 6.995$  min.

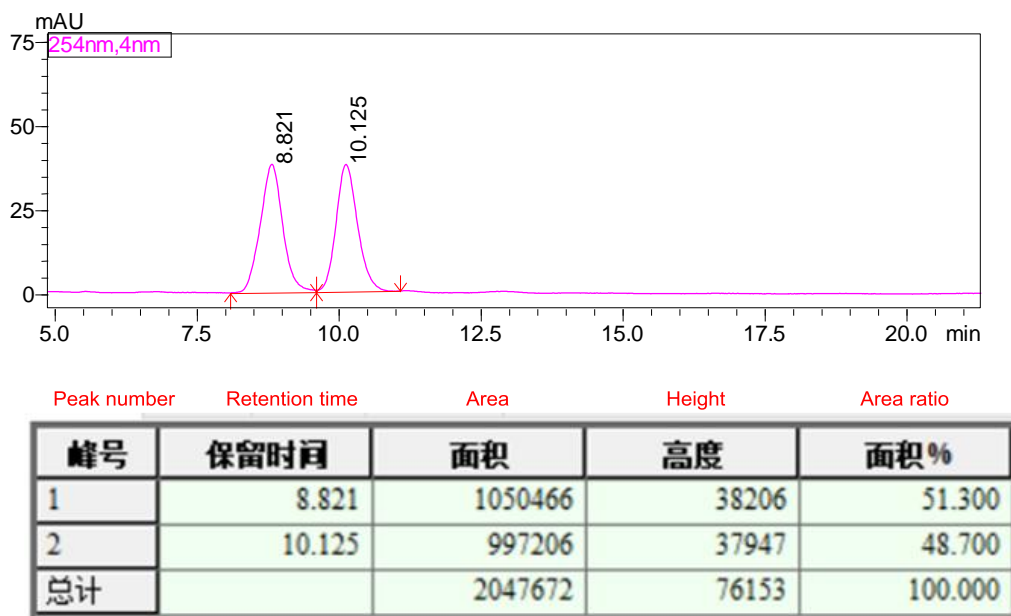

Figure S61. HPLC chromatography of the racemic product 33

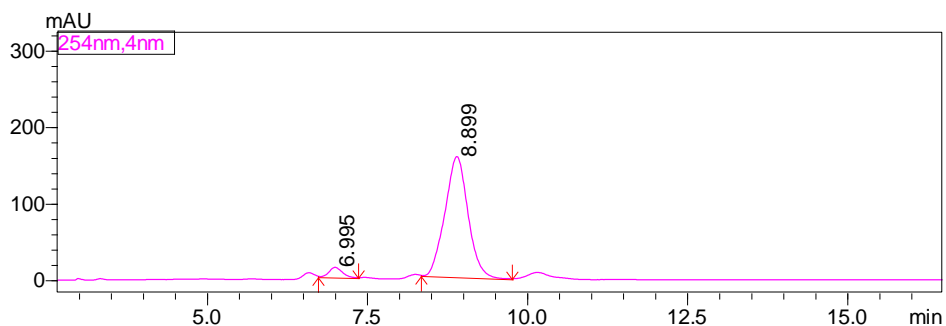



| Peak number | Retention time | Area    | Height | Area ratio |
|-------------|----------------|---------|--------|------------|
| 峰号          | 保留时间           | 面积      | 高度     | 面积%        |
| 1           | 6.995          | 187294  | 13112  | 4.518      |
| 2           | 8.899          | 3958415 | 158323 | 95.482     |
| 总计          |                | 4145709 | 171435 | 100.000    |

Figure S62. HPLC chromatography of chiral product **33**

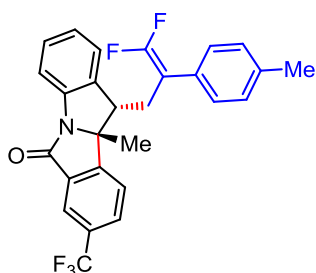

**(10*b*R,11*S*)-11-(3,3-Difluoro-2-(*p*-tolyl)allyl)-10*b*-methyl-8-(trifluoromethyl)-10*b*,11-dihydro-6*H*-isoindolo[2,1-*a*]indol-6-one, **34****

This compound was prepared according to the general procedure **3.2**. Purification by column chromatography on silica gel (Petroleum ether/Ethyl acetate = 7/1, v/v) afforded **34** as yellow oil (52.9 mg, 0.113 mmol, 56% yield).

**<sup>1</sup>H NMR (500 MHz, CDCl<sub>3</sub>):** δ 8.21 (s, 1H), 7.93 (dd, *J* = 8.0, 1.5 Hz, 1H), 7.74 (d, *J* = 8.0 Hz, 1H), 7.64 (d, *J* = 8.0 Hz, 1H), 7.38 (td, *J* = 7.5, 1.5 Hz, 1H), 7.24 – 7.20 (m, 3H), 7.17 – 7.12 (m, 3H), 3.13 (dd, *J* = 10.5, 5.0 Hz, 1H), 2.39 (s, 3H), 2.19 – 2.15 (m, 1H), 1.70 – 1.65 (m, 1H), 1.51 (s, 3H) ppm.

**<sup>13</sup>C NMR (126 MHz, CDCl<sub>3</sub>):** δ 165.6, 154.0 (dd, *J* = 292.6, 289.4 Hz), 151.0, 138.2, 137.7, 137.4, 134.7, 131.8 (q, *J* = 33.0 Hz), 129.7, 129.5 (t, *J* = 3.8 Hz), 129.2 (t, *J* = 3.8 Hz), 128.9, 127.9 (t, *J* = 3.2 Hz), 126.1, 124.9, 123.76 (q, *J* = 273.3 Hz), 123.78, 122.4 (q, *J* = 3.8 Hz), 117.5, 88.6 (dd, *J* = 20.9, 14.5 Hz), 75.2, 47.4 (t, *J* = 2.3 Hz), 31.6, 26.9, 21.3 ppm.

**<sup>19</sup>F NMR (471 MHz, CDCl<sub>3</sub>):** δ -62.3 (s), -89.0 (d, *J* = 37.7 Hz), -89.8 (dd, *J* = 37.7, 3.8 Hz) ppm.

**HRMS (ESI<sup>+</sup>):** *m/z*: [M+Na]<sup>+</sup> calcd for C<sub>27</sub>H<sub>20</sub>F<sub>5</sub>NNaO<sup>+</sup> 492.1357, found 492.1359.

[α]<sub>D</sub><sup>25</sup> = 31.2° (c = 0.50 in CHCl<sub>3</sub>). The enantiomeric excess was determined by HPLC: e.r. = 96.7:3.3 (Chiralpak ID, *i*-propanol/hexane = 10/90, flow rate 1.0 mL/min, λ = 254 nm); *t*<sub>major</sub> = 10.707 min, *t*<sub>minor</sub> = 20.307 min.

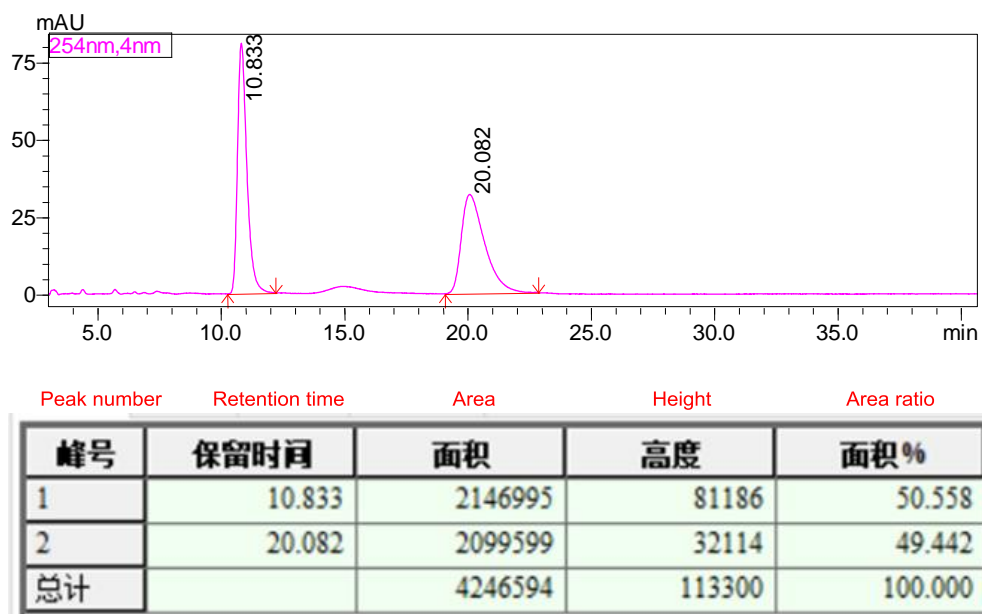

Figure S63. HPLC chromatography of the racemic product **34**

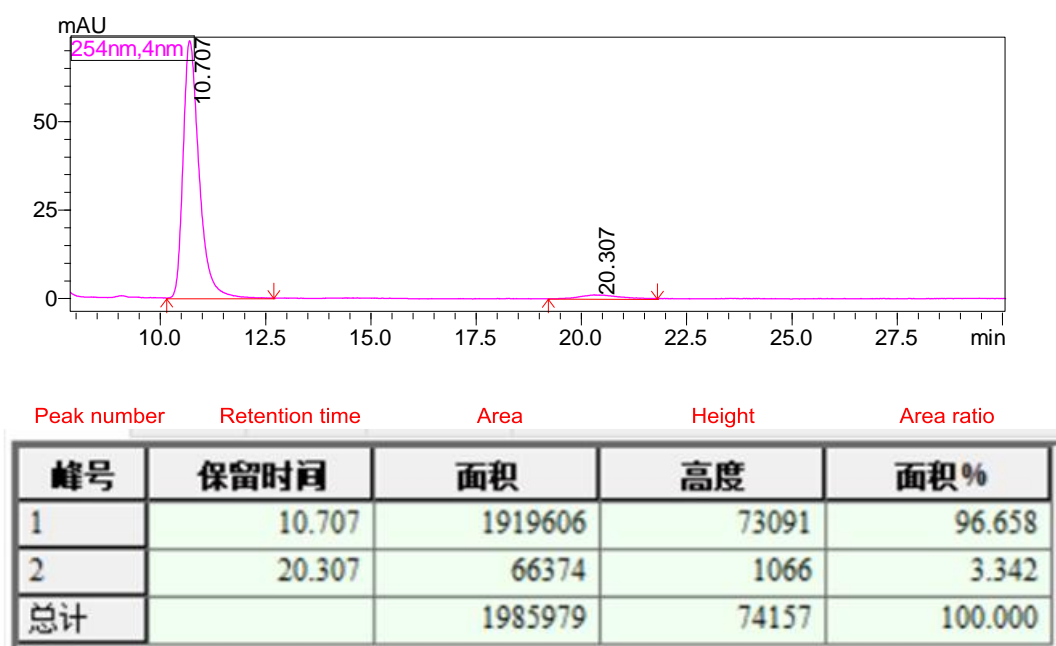

Figure S64. HPLC chromatography of chiral product **34**

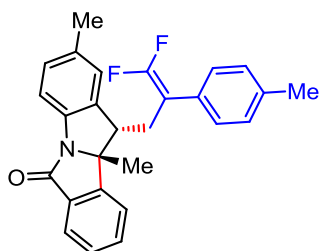

**(10*b*R,11*S*)-11-(3,3-Difluoro-2-(*p*-tolyl)allyl)-2,10*b*-dimethyl-10*b*,11-dihydro-6*H*-isoindolo[2,1-*a*]indol-6-one, 35**

This compound was prepared according to the general procedure 3.2. Purification by column chromatography on silica gel (Petroleum ether/Ethyl acetate = 7/1, v/v) afforded **35** as colorless oil (50.9 mg, 0.123 mmol, 61% yield).

**<sup>1</sup>H NMR (500 MHz, CDCl<sub>3</sub>):** δ 7.92 (d, *J* = 7.5 Hz, 1H), 7.66 (t, *J* = 7.0 Hz, 1H), 7.60 (d, *J* = 8.0 Hz, 1H), 7.53 (t, *J* = 7.5 Hz, 1H), 7.49 (d, *J* = 7.5 Hz, 1H), 7.23 (d, *J* = 8.0 Hz, 2H), 7.17 (d, *J* = 8.0 Hz, 2H), 7.13 (d, *J* = 9.5 Hz, 1H), 6.95 (s, 1H), 3.03 (dd, *J* = 10.5, 5.5 Hz, 1H), 2.38 (s, 3H), 2.32 (s, 3H), 2.21 – 2.15 (m, 1H), 1.68 – 1.62 (m, 1H), 1.47 (s, 3H) ppm.

**<sup>13</sup>C NMR (126 MHz, CDCl<sub>3</sub>):** δ 167.2, 154.0 (dd, *J* = 291.9, 289.2 Hz), 147.7, 138.7, 137.4, 135.4, 133.99, 133.98, 132.3, 129.8 (t, *J* = 3.9 Hz), 129.6, 129.0, 128.9, 128.0 (t, *J* = 3.3 Hz), 126.7, 125.0, 123.0, 116.9, 88.9 (dd, *J* = 21.2, 14.4 Hz), 75.1, 47.4 (t, *J* = 2.5 Hz), 31.6, 26.9, 21.4, 21.2 ppm.

**<sup>19</sup>F NMR (471 MHz, CDCl<sub>3</sub>):** δ -89.1 (d, *J* = 38.2 Hz), -90.4 (d, *J* = 38.2 Hz) ppm.

**HRMS (ESI<sup>+</sup>):** *m/z*: [M+Na]<sup>+</sup> calcd for C<sub>27</sub>H<sub>23</sub>F<sub>2</sub>NNaO<sup>+</sup> 438.1640, found 438.1641.

[α]<sub>D</sub><sup>25</sup> = 73.6° (c = 0.50 in CHCl<sub>3</sub>). The enantiomeric excess was determined by HPLC: e.r. = 96.4:3.6 (Chiralpak AD-H, *i*-propanol/hexane = 5/95, flow rate 1.0 mL/min, λ = 254 nm); *t*<sub>major</sub> = 35.453 min, *t*<sub>minor</sub> = 8.609 min.

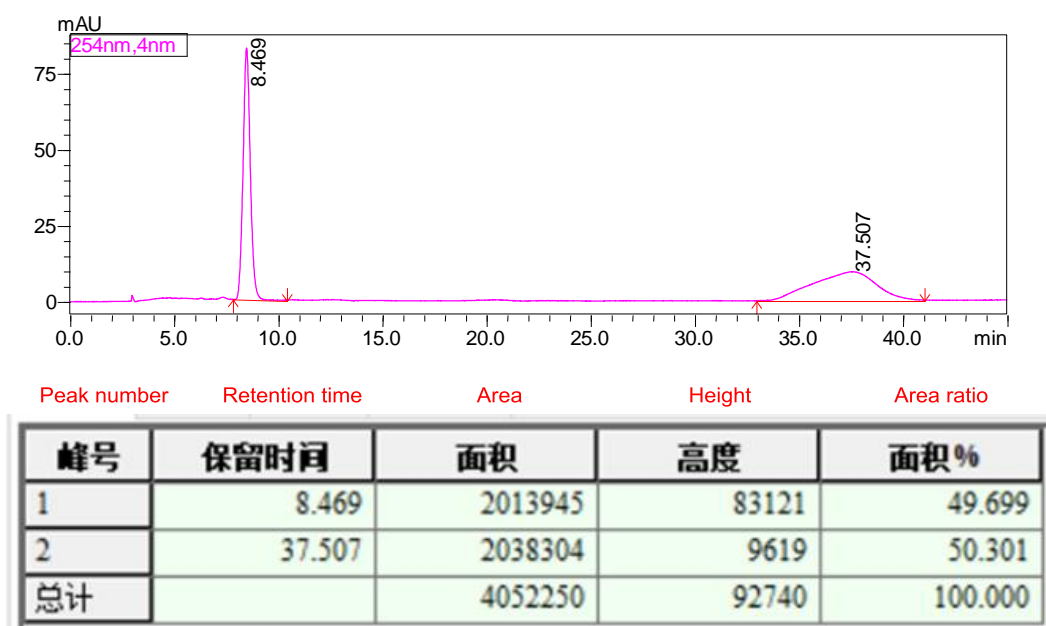

**Figure S65.** HPLC chromatography of the racemic product **35**

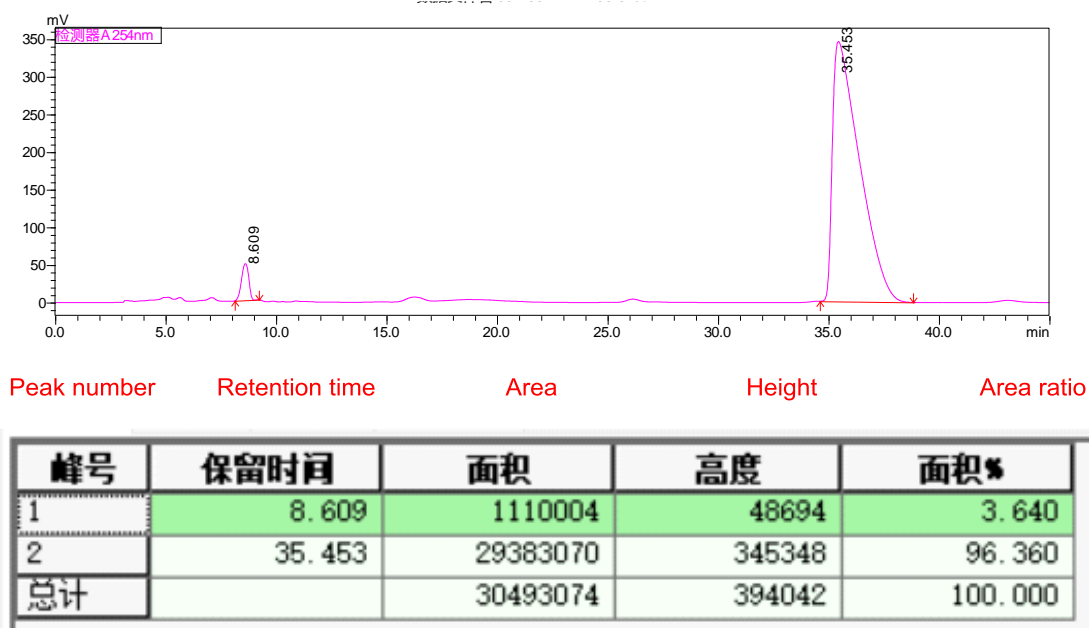

Figure S66. HPLC chromatography of chiral product **35**

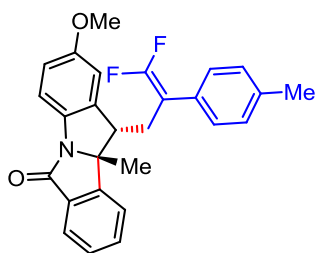

**(10bR,11S)-11-(3,3-Difluoro-2-(*p*-tolyl)allyl)-2-methoxy-10b-methyl-10b,11-dihydro-6H-isoindolo[2,1-*a*]indol-6-one, **36****

This compound was prepared according to the general procedure **3.2**. Purification by column chromatography on silica gel (Petroleum ether/Ethyl acetate = 7/1, v/v) afforded **36** as a yellow solid (56.2 mg, 0.130 mmol, 65% yield). **m.p.** 38.0 – 39.7 °C.

**<sup>1</sup>H NMR (500 MHz, CDCl<sub>3</sub>):** δ 7.92 (d, *J* = 7.5 Hz, 1H), 7.66 (t, *J* = 7.5 Hz, 1H), 7.63 (d, *J* = 8.5 Hz, 1H), 7.54 (t, *J* = 8.0 Hz, 1H), 7.49 (d, *J* = 7.5 Hz, 1H), 7.23 (d, *J* = 8.0 Hz, 2H), 7.19 (d, *J* = 8.0 Hz, 2H), 6.87 (dd, *J* = 8.5, 3.0 Hz, 1H), 6.73 (d, *J* = 2.5 Hz, 1H), 3.78 (s, 3H), 3.02 (dd, *J* = 10.5, 5.0 Hz, 1H), 2.38 (s, 3H), 2.22 – 2.17 (m, 1H), 1.69 – 1.63 (m, 1H), 1.47 (s, 3H) ppm.

**<sup>13</sup>C NMR (126 MHz, CDCl<sub>3</sub>):** δ 167.2, 156.9, 154.0 (dd, *J* = 291.8, 289.2 Hz), 147.6, 140.1, 137.5, 133.9, 132.2, 131.4, 129.7, 129.0, 127.9 (t, *J* = 3.4 Hz), 124.9, 122.9, 117.8, 113.2, 112.6, 88.9 (*J* = 20.9, 14.1 Hz), 75.3, 55.8, 47.5 (t, *J* = 2.3 Hz), 31.4, 26.9, 21.2 ppm.

**<sup>19</sup>F NMR (471 MHz, CDCl<sub>3</sub>):** δ -89.0 (d, *J* = 37.7 Hz), -90.1 (dd, *J* = 38.2, 4.2 Hz)

ppm.

**HRMS (ESI<sup>+</sup>):**  $m/z$ :  $[M+Na]^+$  calcd for  $C_{27}H_{23}F_2NNaO_2^+$  454.1589, found 454.1587.

$[\alpha]_D^{25} = 27.2^\circ$  ( $c = 0.50$  in  $CHCl_3$ ). The enantiomeric excess was determined by HPLC: e.r. = 98.4:1.6 (Chiralpak AD-H, *i*-propanol/hexane = 10/90, flow rate 1.0 mL/min,  $\lambda = 254$  nm);  $t_{major} = 22.043$  min,  $t_{minor} = 8.713$  min.

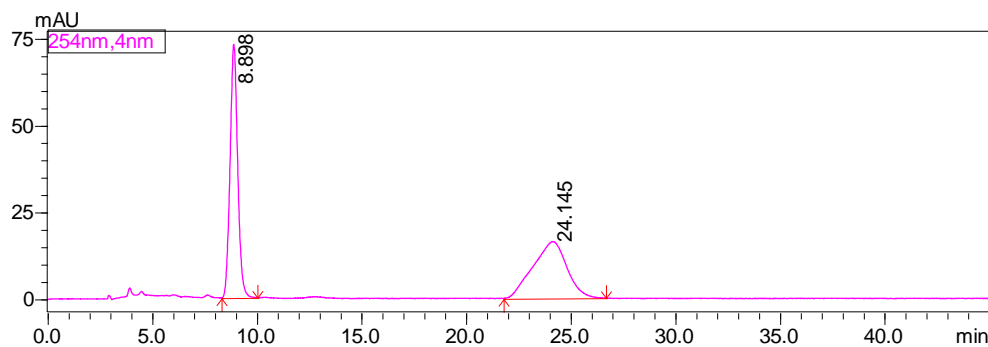

| Peak number | Retention time | Area    | Height | Area ratio |
|-------------|----------------|---------|--------|------------|
| 峰号          | 保留时间           | 面积      | 高度     | 面积%        |
| 1           | 8.898          | 1860092 | 73290  | 50.125     |
| 2           | 24.145         | 1850848 | 16433  | 49.875     |
| 总计          |                | 3710940 | 89723  | 100.000    |

Figure S67. HPLC chromatography of the racemic product 36

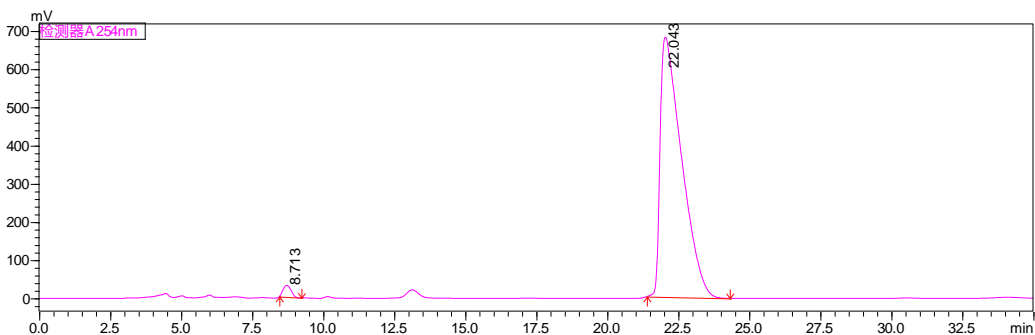

| Peak number | Retention time | Area     | Height | Area ratio |
|-------------|----------------|----------|--------|------------|
| 峰号          | 保留时间           | 面积       | 高度     | 面积%        |
| 1           | 8.713          | 584379   | 29996  | 1.612      |
| 2           | 22.043         | 35669400 | 679982 | 98.388     |
| 总计          |                | 36253779 | 709979 | 100.000    |

Figure S68. HPLC chromatography of chiral product 36

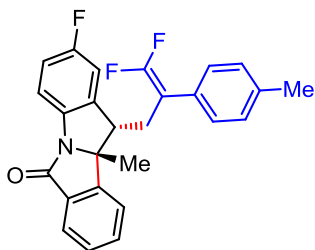

**(10bR,11S)-11-(3,3-Difluoro-2-(*p*-tolyl)allyl)-2-fluoro-10b-methyl-10b,11-dihydro-6H-isoindolo[2,1-*a*]indol-6-one, **37****

This compound was prepared according to the general procedure **3.2**. Purification by column chromatography on silica gel (Petroleum ether/Ethyl acetate = 10/1, v/v) afforded **37** as a white solid (53.2 mg, 0.123 mmol, 63% yield). **m.p.** 39.3 – 41.7 °C.

**<sup>1</sup>H NMR (500 MHz, CDCl<sub>3</sub>):** δ 7.94 (d, *J* = 7.5 Hz, 1H), 7.70 – 7.64 (m, 2H), 7.56 (t, *J* = 7.5 Hz, 1H), 7.50 (d, *J* = 8.0 Hz, 1H), 7.25 (d, *J* = 8.0 Hz, 2H), 7.18 (d, *J* = 7.5 Hz, 2H), 7.05 (td, *J* = 9.0, 2.5 Hz, 1H), 6.87 (dd, *J* = 8.0, 2.0 Hz, 1H), 3.03 (dd, *J* = 10.5, 4.5 Hz, 1H), 2.39 (s, 3H), 2.24 – 2.18 (m, 1H), 1.67 – 1.61 (m, 1H), 1.49 (s, 3H) ppm.

**<sup>13</sup>C NMR (126 MHz, CDCl<sub>3</sub>):** δ 167.4, 160.0 (d, *J* = 243.4 Hz), 154.1 (dd, *J* = 292.3, 289.2 Hz), 147.6, 140.4 (d, *J* = 8.3 Hz), 137.7, 134.0 (d, *J* = 1.8 Hz), 133.7, 132.6, 129.8, 129.5 (t, *J* = 3.4 Hz), 129.2, 127.9 (t, *J* = 3.2 Hz), 125.2, 123.0, 118.1 (d, *J* = 8.8 Hz), 115.2 (d, *J* = 23.6 Hz), 113.5 (d, *J* = 24.3 Hz), 88.6 (dd, *J* = 21.2, 14.6 Hz), 75.4, 47.5, 31.4, 26.9, 21.3 ppm.

**<sup>19</sup>F NMR (471 MHz, CDCl<sub>3</sub>):** δ -88.9 (d, *J* = 37.2 Hz), -89.7 (dd, *J* = 37.2, 3.8 Hz), -118.0 (m) ppm.

**HRMS (ESI<sup>+</sup>):** *m/z*: [M+Na]<sup>+</sup> calcd for C<sub>26</sub>H<sub>20</sub>F<sub>3</sub>NNaO<sup>+</sup> 442.1389, found 442.1389.

[α]<sub>D</sub><sup>25</sup> = 253.6° (c = 0.50 in CHCl<sub>3</sub>). The enantiomeric excess was determined by HPLC: e.r. = 97.7:2.3 (Chiralpak AD-H, *i*-propanol/hexane = 5/95, flow rate 1.0 mL/min, λ = 254 nm); *t*<sub>major</sub> = 14.445 min, *t*<sub>minor</sub> = 8.760 min.

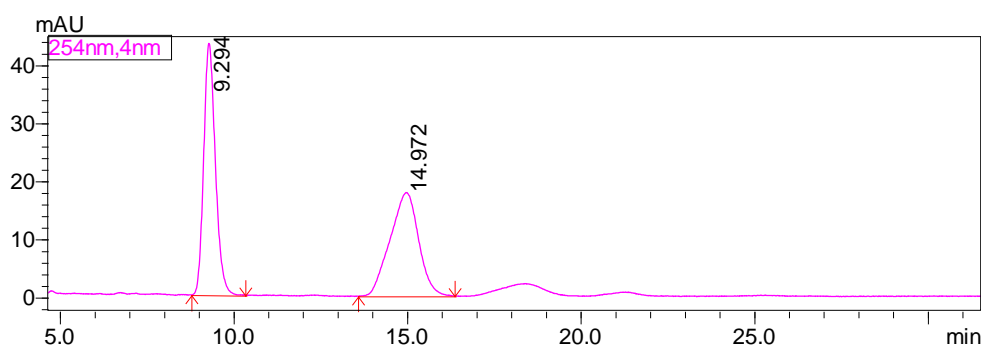

| Peak number | Retention time | Area    | Height | Area ratio |
|-------------|----------------|---------|--------|------------|
| 峰号          | 保留时间           | 面积      | 高度     | 面积%        |
| 1           | 9.294          | 1019211 | 43534  | 49.825     |
| 2           | 14.972         | 1026371 | 17952  | 50.175     |
| 总计          |                | 2045582 | 61487  | 100.000    |

Figure S69. HPLC chromatography of the racemic product **37**

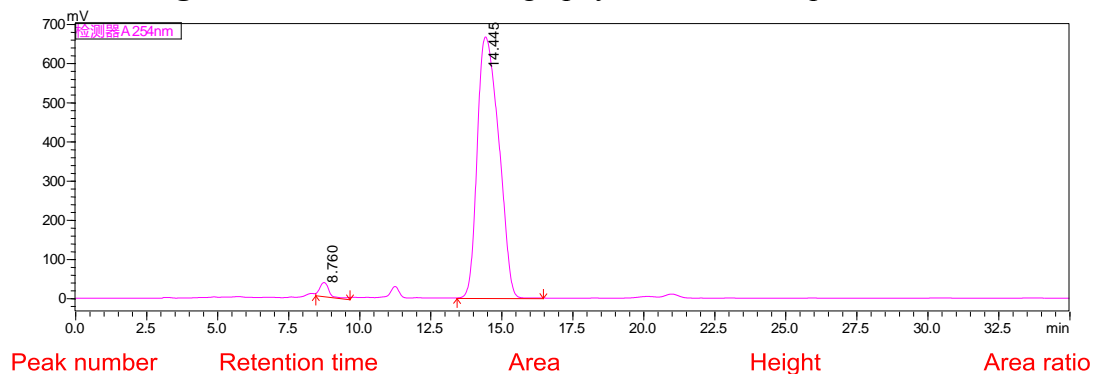

| 峰号 | 保留时间   | 面积       | 高度     | 面积%     |
|----|--------|----------|--------|---------|
| 1  | 8.760  | 809352   | 35240  | 2.261   |
| 2  | 14.445 | 34982048 | 666374 | 97.739  |
| 总计 |        | 35791400 | 701614 | 100.000 |

Figure S70. HPLC chromatography of chiral product **37**

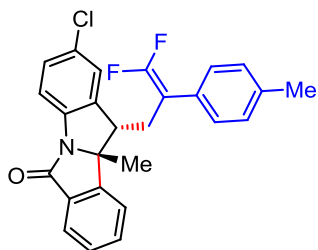

**(10bR,11S)-2-Chloro-11-(3,3-difluoro-2-(p-tolyl)allyl)-10b-methyl-10b,11-dihydro-6H-isoindolo[2,1-a]indol-6-one, **38****

This compound was prepared according to the general procedure **3.2**. Purification by column chromatography on silica gel (Petroleum ether/Ethyl acetate = 10/1, v/v) afforded **38** as yellow oil (54.1 mg, 0.124 mmol, 62% yield).

<sup>1</sup>H NMR (500 MHz, CDCl<sub>3</sub>): δ 7.94 (d, *J* = 7.5 Hz, 1H), 7.69 (t, *J* = 7.5 Hz, 1H), 7.63 (d, *J* = 8.0 Hz, 1H), 7.57 (t, *J* = 7.5 Hz, 1H), 7.50 (d, *J* = 7.5 Hz, 1H), 7.31 (dd, *J* = 8.5, 2.0 Hz, 1H), 7.24 (d, *J* = 8.0 Hz, 2H), 7.17 (d, *J* = 7.5 Hz, 2H), 7.09 (d, *J* = 1.5 Hz, 1H), 3.05 (dd, *J* = 10.5, 5.0 Hz, 1H), 2.39 (s, 3H), 2.23 – 2.18 (m, 1H), 1.68 – 1.62 (m, 1H), 1.48 (s, 3H) ppm.

<sup>13</sup>C NMR (126 MHz, CDCl<sub>3</sub>): δ 167.3, 154.1 (dd, *J* = 292.3, 289.0 Hz), 147.5, 140.3,

137.7, 136.5, 133.6, 132.7, 129.8, 129.6, 129.5 (t,  $J = 3.5$  Hz), 129.2, 128.7, 127.9 (t,  $J = 3.3$  Hz), 126.3, 125.3, 123.1, 118.2, 88.6 (dd,  $J = 21.0, 14.7$  Hz), 75.3, 47.5, 31.4, 27.0, 21.3 ppm.

$^{19}\text{F}$  NMR (471 MHz,  $\text{CDCl}_3$ ):  $\delta$  -88.9 (d,  $J = 37.2$  Hz), -89.8 (dd,  $J = 37.2, 3.3$  Hz) ppm.

HRMS (ESI<sup>+</sup>):  $m/z$ :  $[\text{M}+\text{Na}]^+$  calcd  $\text{C}_{26}\text{H}_{20}\text{ClF}_2\text{NNaO}^+$  458.1094, found 458.1092.

$[\alpha]_D^{25} = 152.0^\circ$  ( $c = 0.50$  in  $\text{CHCl}_3$ ). The enantiomeric excess was determined by HPLC: e.r. = 97.1:2.9 (Chiralpak AD-H, *i*-propanol/hexane = 5/95, flow rate 1.0 mL/min,  $\lambda = 254$  nm);  $t_{\text{major}} = 21.695$  min,  $t_{\text{minor}} = 8.488$  min.

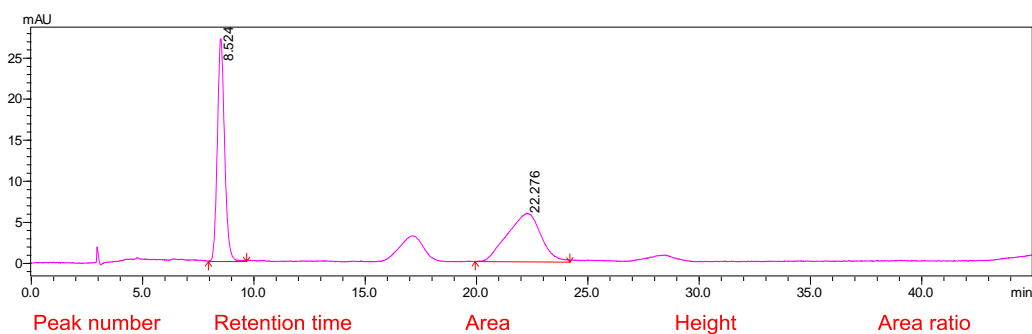

Figure S71. HPLC chromatography of the racemic product **38**

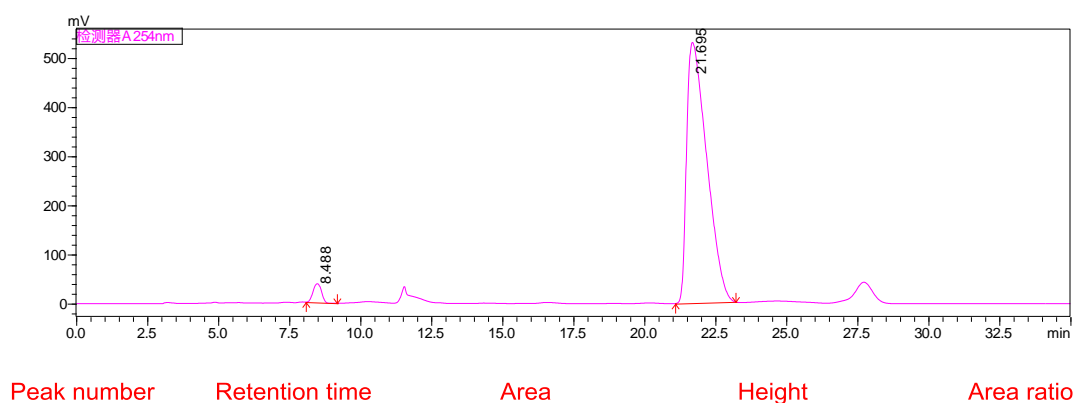

Figure S72. HPLC chromatography of chiral product **38**



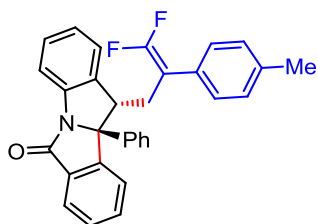

**(10bS,11S)-11-(3,3-Difluoro-2-(*p*-tolyl)allyl)-10b-phenyl-10b,11-dihydro-6H-isoindolo[2,1-*a*]indol-6-one, **39****

This compound was prepared according to the general procedure **3.2**. Purification by column chromatography on silica gel (Petroleum ether/Ethyl acetate = 7/1, v/v) afforded **39** as a white solid (33.6 mg, 0.072 mmol, 36% yield). **m.p.** 75.7 – 80.8 °C. **<sup>1</sup>H NMR (500 MHz, CDCl<sub>3</sub>):** δ 7.92 (d, *J* = 8.0 Hz, 1H), 7.83 (d, *J* = 7.5 Hz, 1H), 7.59 (d, *J* = 4.5 Hz, 2H), 7.51 – 7.48 (m, 1H), 7.39 (d, *J* = 7.5 Hz, 2H), 7.35 – 7.32 (m, 1H), 7.29 – 7.26 (m, 4H), 7.20 (t, *J* = 7.5 Hz, 2H), 7.15 (t, *J* = 7.0 Hz, 1H), 7.06 – 7.02 (m, 2H), 3.72 (dd, *J* = 10.5, 5.5 Hz, 1H), 2.50 – 2.45 (m, 1H), 2.41 (s, 3H), 1.90 – 1.85 (m, 1H) ppm.

**<sup>13</sup>C NMR (126 MHz, CDCl<sub>3</sub>):** δ 168.1, 154.1 (dd, *J* = 292.3, 288.9 Hz), 147.0, 142.8, 138.4, 138.3, 137.7, 133.2, 132.7, 129.8, 129.1, 128.9, 128.8, 127.99, 127.98, 127.96, 125.6, 125.2, 124.9, 124.8, 124.1, 117.3, 88.9 (dd, *J* = 20.9, 14.4 Hz), 80.4, 48.7, 32.0, 21.3 ppm.

**<sup>19</sup>F NMR (471 MHz, CDCl<sub>3</sub>):** δ -88.8 (d, *J* = 36.7 Hz), -89.8 (d, *J* = 36.7 Hz) ppm.

**HRMS (ESI<sup>+</sup>):** *m/z*: [M+Na]<sup>+</sup> calcd for C<sub>31</sub>H<sub>23</sub>F<sub>2</sub>NNaO<sup>+</sup> 486.1640, found 486.1641.

[α]<sub>D</sub><sup>25</sup> = 174.4° (c = 0.50 in CHCl<sub>3</sub>). The enantiomeric excess was determined by HPLC: e.r. = 99.1:0.9 (Chiralpak AD-H, *i*-propanol/hexane = 5/95, flow rate 1.0 mL/min, λ = 254 nm); *t*<sub>major</sub> = 19.531 min, *t*<sub>minor</sub> = 21.791 min.

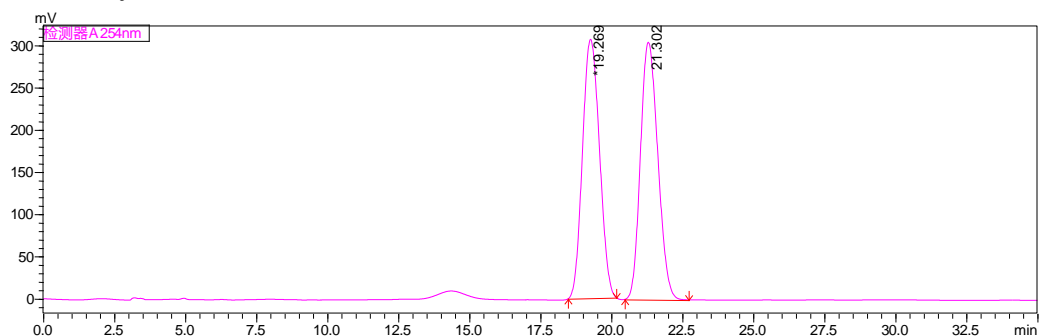

| Peak number | Retention time | Area     | Height | Area ratio |
|-------------|----------------|----------|--------|------------|
| 峰号          | 保留时间           | 面积       | 高度     | 面积%        |
| 1           | 19.269         | 12775933 | 306806 | 49.660     |
| 2           | 21.302         | 12951121 | 304678 | 50.340     |
| 总计          |                | 25727054 | 611484 | 100.000    |

Figure S73. HPLC chromatography of the racemic product **39**

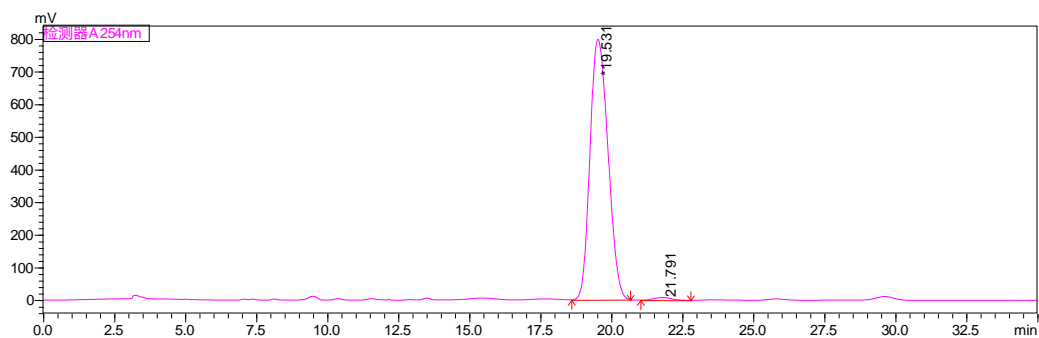

| Peak number | Retention time | Area     | Height | Area ratio |
|-------------|----------------|----------|--------|------------|
| 峰号          | 保留时间           | 面积       | 高度     | 面积%        |
| 1           | 19.531         | 35181822 | 797274 | 99.066     |
| 2           | 21.791         | 331811   | 8183   | 0.934      |
| 总计          |                | 35513632 | 805456 | 100.000    |

Figure S74. HPLC chromatography of chiral product **39**

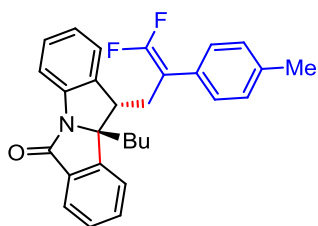

**(10bR,11S)-10b-Butyl-11-(3,3-difluoro-2-(p-tolyl)allyl)-10b,11-dihydro-6H-isoindolo[2,1-a]indol-6-one, 40**

This compound was prepared according to the general procedure **3.2**. Purification by column chromatography on silica gel (Petroleum ether/Ethyl acetate = 7/1, v/v) afforded **40** as colorless oil (58.5 mg, 0.132 mmol, 66% yield).

$^1\text{H NMR}$  (500 MHz,  $\text{CDCl}_3$ ):  $\delta$  7.93 (d,  $J = 7.5$  Hz, 1H), 7.73 (d,  $J = 8.0$  Hz, 1H), 7.67 (t,  $J = 7.0$  Hz, 1H), 7.55 (t,  $J = 7.5$  Hz, 1H), 7.47 (d,  $J = 7.5$  Hz, 1H), 7.34 (t,  $J = 7.5$  Hz, 1H), 7.24 (d,  $J = 8.0$  Hz, 2H), 7.19 – 7.15 (m, 3H), 7.08 (t,  $J = 7.5$  Hz, 1H), 3.06

(dd,  $J = 11.0, 5.0$  Hz, 1H), 2.39 (s, 3H), 2.27 – 2.22 (m, 1H), 1.84 – 1.81 (m, 2H), 1.67 – 1.61 (m, 1H), 1.07 – 1.01 (m, 3H), 0.66 (t,  $J = 7.0$  Hz, 3H), 0.61 – 0.55 (m, 1H) ppm.

$^{13}\text{C}$  NMR (126 MHz,  $\text{CDCl}_3$ ):  $\delta$  168.0, 154.0 (dd,  $J = 291.7, 289.2$  Hz), 146.4, 139.0, 138.1, 137.5, 134.7, 132.4, 129.8 (t,  $J = 3.4$  Hz), 129.7, 129.0, 128.6, 128.0 (t,  $J = 3.3$  Hz), 125.9, 125.0, 124.4, 123.1, 117.3, 88.8 (dd,  $J = 21.3, 14.4$  Hz), 78.2, 47.2, 38.9, 31.4, 25.2, 22.6, 21.3, 13.9 ppm.

$^{19}\text{F}$  NMR (471 MHz,  $\text{CDCl}_3$ ):  $\delta$  -89.1 (d,  $J = 37.7$  Hz), -90.1 (d,  $J = 38.2, 4.2$  Hz) ppm.

HRMS (ESI<sup>+</sup>):  $m/z$ :  $[\text{M}+\text{Na}]^+$  calcd for  $\text{C}_{29}\text{H}_{27}\text{F}_2\text{NNaO}^+$  466.1953, found 466.1954.

$[\alpha]_D^{25} = 20.8^\circ$  ( $c = 0.50$  in  $\text{CHCl}_3$ ). The enantiomeric excess was determined by HPLC: e.r. = 97.8:2.2 (Chiralpak AD-H, *i*-propanol/hexane = 10/90, flow rate 1.0 mL/min,  $\lambda = 254$  nm);  $t_{\text{major}} = 5.806$  min,  $t_{\text{minor}} = 4.633$  min.

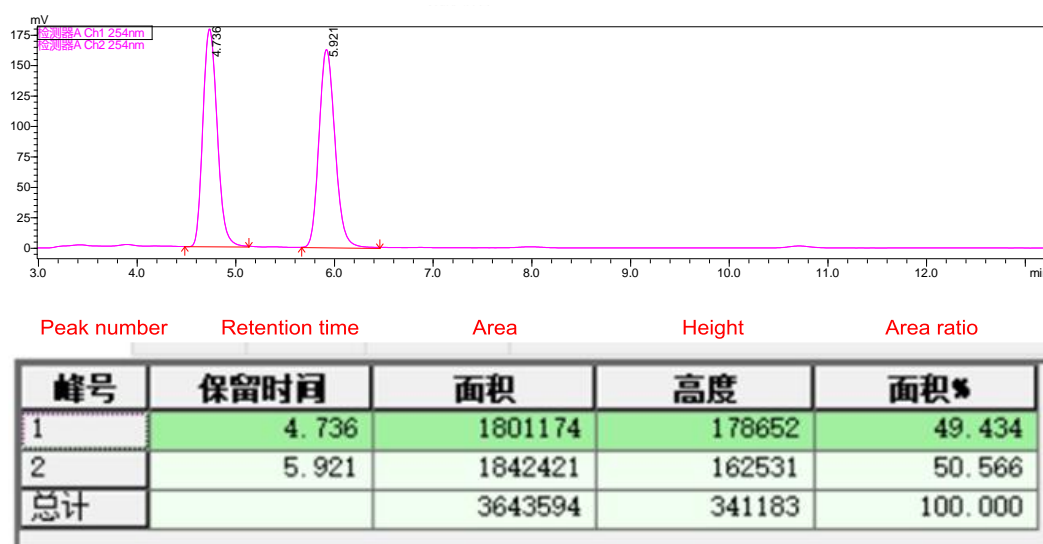

Figure S75. HPLC chromatography of the racemic product 40

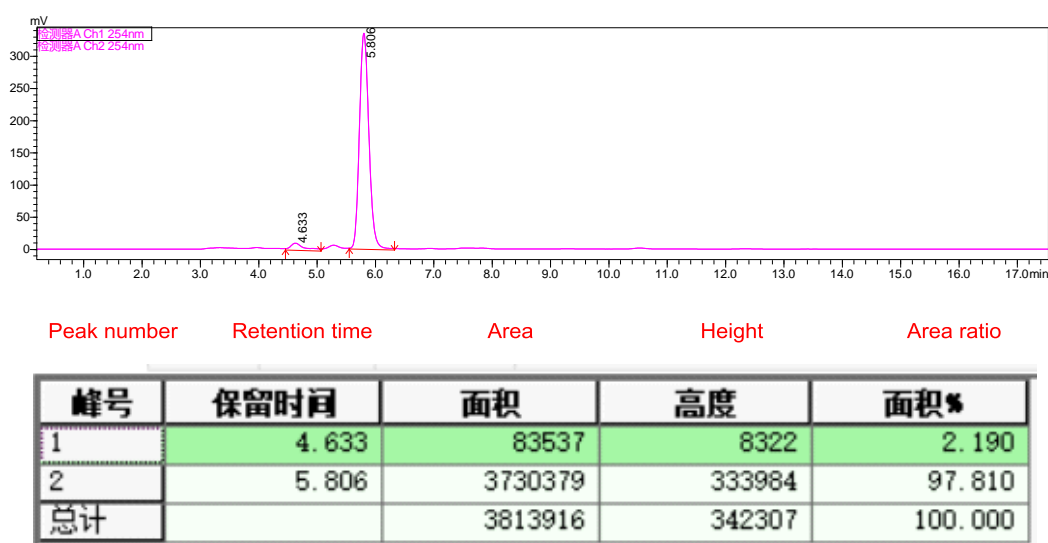

**Figure S76.** HPLC chromatography of chiral product **40**

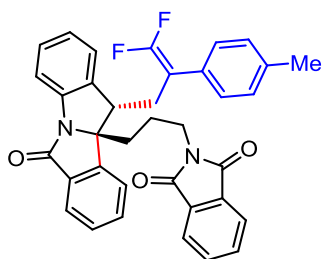

**2-(3-((10*b*R,11*S*)-11-(3,3-Difluoro-2-(*p*-tolyl)allyl)-6-oxo-6*H*-isoindolo[2,1-*a*]indol-10*b*(11*H*)-yl)propyl)isoindoline-1,3-dione, **41****

This compound was prepared according to the general procedure **3.2**. Purification by column chromatography on silica gel (Petroleum ether/Ethyl acetate = 5/1, v/v) afforded **41** as a white solid (48.3 mg, 0.084 mmol, 42% yield). **m.p.** 69.5 – 70.9 °C.

**<sup>1</sup>H NMR (500 MHz, CDCl<sub>3</sub>):** δ 7.83 (d, *J* = 7.5 Hz, 1H), 7.66 (dd, *J* = 5.5, 3.0 Hz, 2H), 7.61 (d, *J* = 8.0 Hz, 1H), 7.58 – 7.56 (m, 3H), 7.45 (t, *J* = 8.0 Hz, 1H), 7.37 (d, *J* = 7.5 Hz, 1H), 7.24 (t, *J* = 7.5 Hz, 1H), 7.14 (d, *J* = 8.0 Hz, 2H), 7.09 – 7.05 (m, 3H), 6.99 (t, *J* = 7.0 Hz, 1H), 3.33 (td, *J* = 7.0, 3.0 Hz, 2H), 2.97 (dd, *J* = 10.5, 4.5 Hz, 1H), 2.30 (s, 3H), 2.15 – 2.10 (m, 1H), 1.90 – 1.77 (m, 2H), 1.55 – 1.50 (m, 1H), 1.42 – 1.33 (m, 1H), 0.97 – 0.88 (m, 1H) ppm.

**<sup>13</sup>C NMR (126 MHz, CDCl<sub>3</sub>):** δ 168.2, 167.9, 154.0 (dd, *J* = 291.8, 289.4 Hz), 145.7, 138.6, 137.9, 137.5, 134.5, 134.0, 132.7, 132.0, 129.7, 129.6 (t, *J* = 3.5 Hz), 129.2, 128.7, 127.9 (t, *J* = 3.3 Hz), 125.9, 125.1, 124.4, 123.3, 123.0, 117.5, 88.7 (dd, *J* = 21.0, 14.6 Hz), 77.6, 47.2, 37.6, 36.1, 31.4, 22.6, 21.3 ppm.

**<sup>19</sup>F NMR (471 MHz, CDCl<sub>3</sub>):** δ -89.1 (d, *J* = 37.7 Hz), -90.1 (d, *J* = 38.2, 4.2 Hz) ppm.

**HRMS (ESI<sup>+</sup>):** *m/z*: [M+Na]<sup>+</sup> calcd for C<sub>36</sub>H<sub>28</sub>F<sub>2</sub>N<sub>2</sub>NaO<sub>3</sub><sup>+</sup> 597.1960, found 597.1960.

[α]<sub>D</sub><sup>25</sup> = 99.2° (c = 0.50 in CHCl<sub>3</sub>). The enantiomeric excess was determined by HPLC: e.r. = 96.9:3.1 (Chiralpak AD-H, *i*-propanol/hexane = 30/70, flow rate 1.0 mL/min, λ = 254 nm); *t*<sub>major</sub> = 17.596 min, *t*<sub>minor</sub> = 9.509 min.

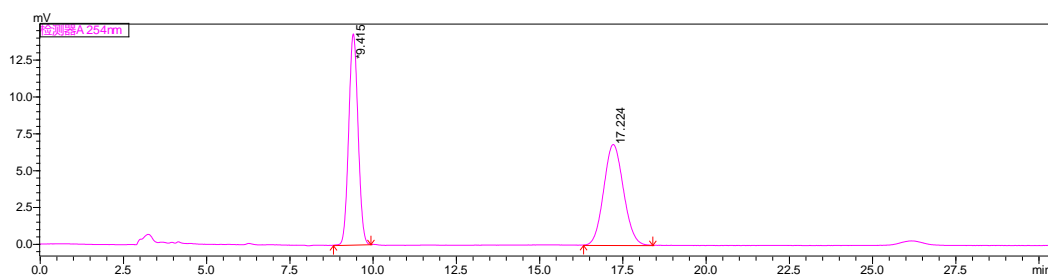

| Peak number | Retention time | Area   | Height | Area ratio |
|-------------|----------------|--------|--------|------------|
| 峰号          | 保留时间           | 面积     | 高度     | 面积%        |
| 1           | 9.415          | 279091 | 14322  | 49.786     |
| 2           | 17.224         | 281487 | 6828   | 50.214     |
| 总计          |                | 560579 | 21149  | 100.000    |

Figure S77. HPLC chromatography of the racemic product **41**

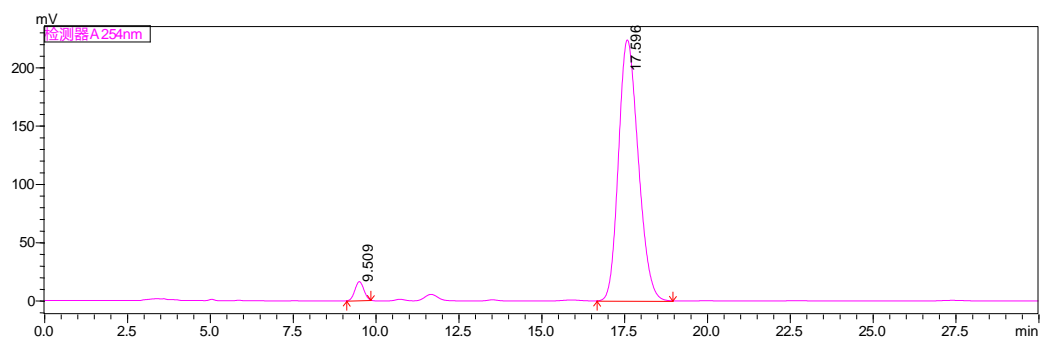

| Peak number | Retention time | Area    | Height | Area ratio |
|-------------|----------------|---------|--------|------------|
| 峰号          | 保留时间           | 面积      | 高度     | 面积%        |
| 1           | 9.509          | 296420  | 16007  | 3.095      |
| 2           | 17.596         | 9280311 | 223812 | 96.905     |
| 总计          |                | 9576731 | 239819 | 100.000    |

Figure S78. HPLC chromatography of chiral product **41**

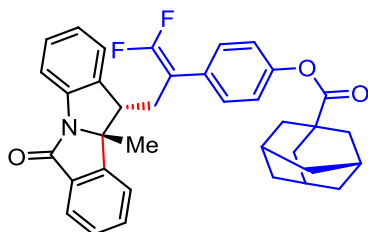

**4-(1,1-Difluoro-3-((10bR,11S)-10b-methyl-6-oxo-10b,11-dihydro-6H-isoindolo[2,1-a]indol-11-yl)prop-1-en-2-yl)phenyl adamantane-1-carboxylate, **42****

This compound was prepared according to the general procedure **3.2**. Purification by column chromatography on silica gel (Petroleum ether/Ethyl acetate = 7/1, v/v) afforded **42** as a white solid (62.0 mg, 0.110 mmol, 55% yield). **m.p.** 71.2 – 72.5 °C.

**<sup>1</sup>H NMR (500 MHz, CDCl<sub>3</sub>):** δ 7.94 (d, *J* = 7.5 Hz, 1H), 7.73 (d, *J* = 8.0 Hz, 1H), 7.68 (t, *J* = 7.5 Hz, 1H), 7.56 (t, *J* = 7.5 Hz, 1H), 7.49 (d, *J* = 7.5 Hz, 1H), 7.36 (t, *J* = 7.5 Hz, 1H), 7.27 (d, *J* = 7.0 Hz, 2H), 7.15 (d, *J* = 7.5 Hz, 1H), 7.12 – 7.08 (m, 3H), 3.07 (dd, *J* = 10.5, 4.5 Hz, 1H), 2.22 – 2.16 (m, 1H), 2.11 – 2.07 (m, 9H), 1.81 – 1.76 (m, 6H), 1.66 – 1.60 (m, 1H), 1.50 (s, 3H) ppm.

$^{13}\text{C}$  NMR (126 MHz,  $\text{CDCl}_3$ ):  $\delta$  176.3, 167.3, 154.2 (dd,  $J = 292.4, 290.2$  Hz), 150.4, 147.7, 138.3, 137.8, 133.9, 132.5, 130.1 (t,  $J = 3.5$  Hz), 129.11, 129.08, 128.8, 125.9, 125.2, 124.5, 123.0, 122.2, 117.5, 88.4 (dd,  $J = 21.7, 14.1$  Hz), 75.0, 47.3, 41.2, 38.9, 36.5, 31.7, 28.0, 27.0 ppm.

$^{19}\text{F}$  NMR (471 MHz,  $\text{CDCl}_3$ ):  $\delta$  -88.4 (d,  $J = 35.8$  Hz), -89.5 (dd,  $J = 36.3, 4.2$  Hz) ppm.

HRMS (ESI<sup>+</sup>):  $m/z$ :  $[\text{M}+\text{Na}]^+$  calcd for  $\text{C}_{36}\text{H}_{33}\text{F}_2\text{NNaO}_3^+$  588.2321, found 588.2320.

$[\alpha]_D^{25} = 92.8^\circ$  ( $c = 0.50$  in  $\text{CHCl}_3$ ). The enantiomeric excess was determined by HPLC: e.r. = 96.3:3.7 (Chiralpak ID, *i*-propanol/hexane = 40/60, flow rate 1.0 mL/min,  $\lambda = 254$  nm);  $t_{\text{major}} = 21.916$  min,  $t_{\text{minor}} = 12.362$  min.

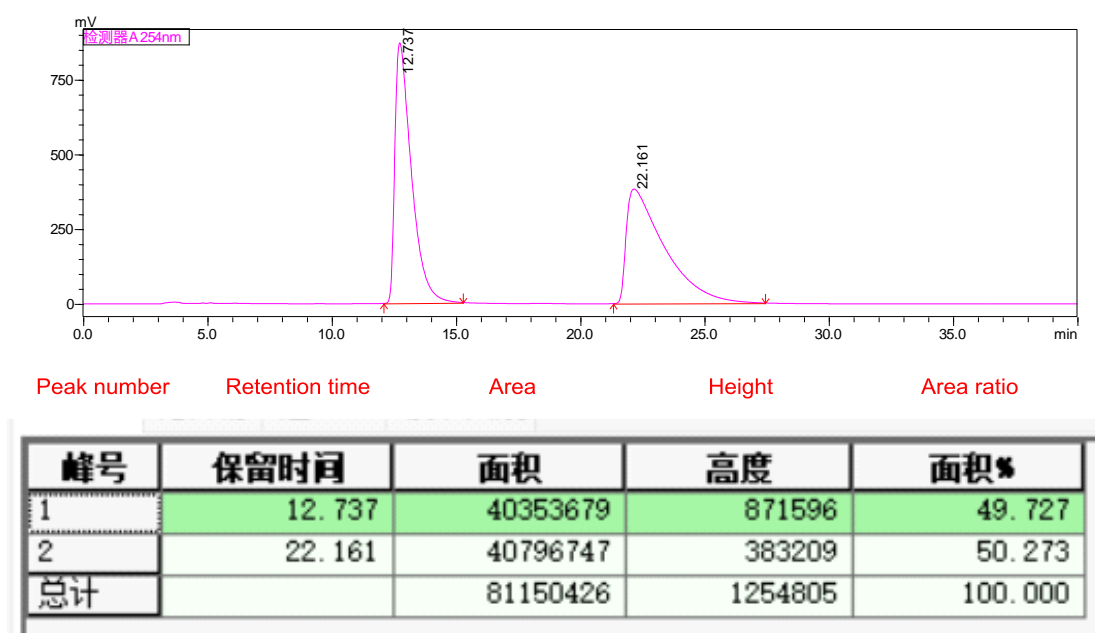

Figure S79. HPLC chromatography of the racemic product 42

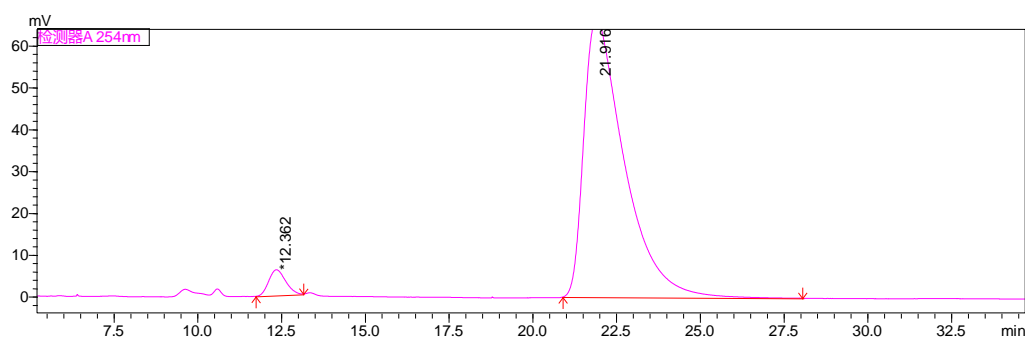

| Peak number | Retention time | Area    | Height | Area ratio |
|-------------|----------------|---------|--------|------------|
| 峰号          | 保留时间           | 面积      | 高度     | 面积%        |
| 1           | 12.362         | 211897  | 6107   | 3.658      |
| 2           | 21.916         | 5580173 | 66539  | 96.342     |
| 总计          |                | 5792070 | 72646  | 100.000    |

Figure S80. HPLC chromatography of chiral product **42**

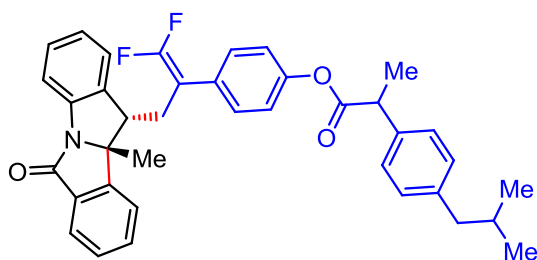

**4-(1,1-Difluoro-3-((10*bR*,11*S*)-10*b*-methyl-6-oxo-10*b*,11-dihydro-6*H*-isoindolo[2,1-*a*]indol-11-yl)prop-1-en-2-yl)phenyl 2-(4-isobutylphenyl)propanoate, **43****

This compound was prepared according to the general procedure **3.2**. Purification by column chromatography on silica gel (Petroleum ether/Ethyl acetate = 7/1, v/v) afforded **43** as a yellow solid (62.6 mg, 0.106 mmol, 53% yield). **m.p.** 43.3 – 44.0 °C.

**<sup>1</sup>H NMR (500 MHz, CDCl<sub>3</sub>):** δ 7.93 (d, *J* = 7.5 Hz, 1H), 7.73 (d, *J* = 7.5 Hz, 1H), 7.66 (t, *J* = 7.5 Hz, 1H), 7.54 (t, *J* = 7.5 Hz, 1H), 7.47 (d, *J* = 7.5 Hz, 1H), 7.36 – 7.31 (m, 3H), 7.25 – 7.23 (m, 2H), 7.16 (d, *J* = 8.0 Hz, 2H), 7.13 (d, *J* = 7.0 Hz, 1H), 7.09 – 7.05 (m, 3H), 3.96 (q, *J* = 7.0 Hz, 1H), 3.04 (dd, *J* = 10.5, 3.5 Hz, 1H), 2.48 (d, *J* = 7.5 Hz, 2H), 2.20 – 2.15 (m, 1H), 1.90 – 1.85 (m, 1H), 1.62 (d, *J* = 7.5 Hz, 4H), 1.48 (s, 3H), 0.92 (d, *J* = 6.5 Hz, 6H) ppm.

**<sup>13</sup>C NMR (126 MHz, CDCl<sub>3</sub>):** δ 173.3, 167.2, 154.1 (dd, *J* = 293.1, 289.8 Hz), 150.1, 147.6, 141.0, 138.3, 137.7, 137.1, 133.8, 132.5, 130.3 (t, *J* = 4.0 Hz), 129.6, 129.0 (t, *J* = 3.9 Hz), 128.7, 127.3, 125.9, 125.1, 124.4, 123.0, 122.0, 117.4, 88.4 (dd, *J* = 21.9, 14.2 Hz), 75.0, 47.2, 45.3, 45.1, 31.6, 30.3, 26.9, 22.5, 18.6 ppm.

**<sup>19</sup>F NMR (471 MHz, CDCl<sub>3</sub>):** δ -88.2 (dd, *J* = 35.8, 12.2 Hz), -89.4 (d, *J* = 35.3 Hz) ppm.

**HRMS (ESI<sup>+</sup>):** *m/z*: [M+Na]<sup>+</sup> calcd for C<sub>38</sub>H<sub>35</sub>F<sub>2</sub>NNaO<sub>3</sub><sup>+</sup> 614.2477, found 614.2478.

[α]<sub>D</sub><sup>25</sup> = 43.2° (c = 0.50 in CHCl<sub>3</sub>). The enantiomeric excess was determined by HPLC: e.r. = 97.0:3.0 (Chiralpak ID, *i*-propanol/hexane = 30/70, flow rate 1.0 mL/min, λ = 254 nm); *t*<sub>major</sub> = 21.412 min, *t*<sub>minor</sub> = 12.475 min.

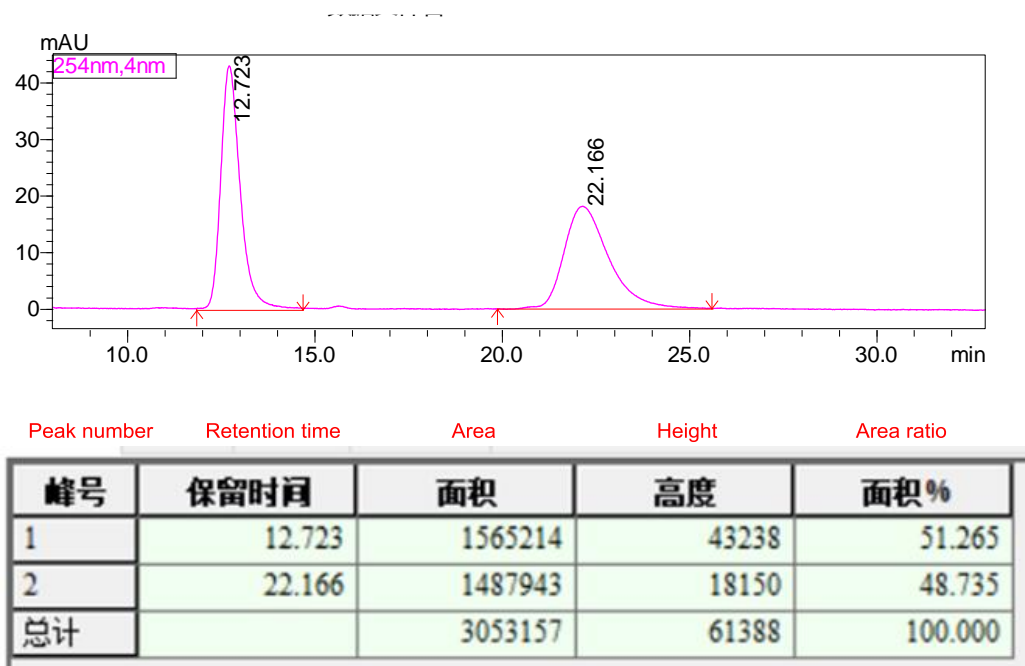

Figure S81. HPLC chromatography of the racemic product 43

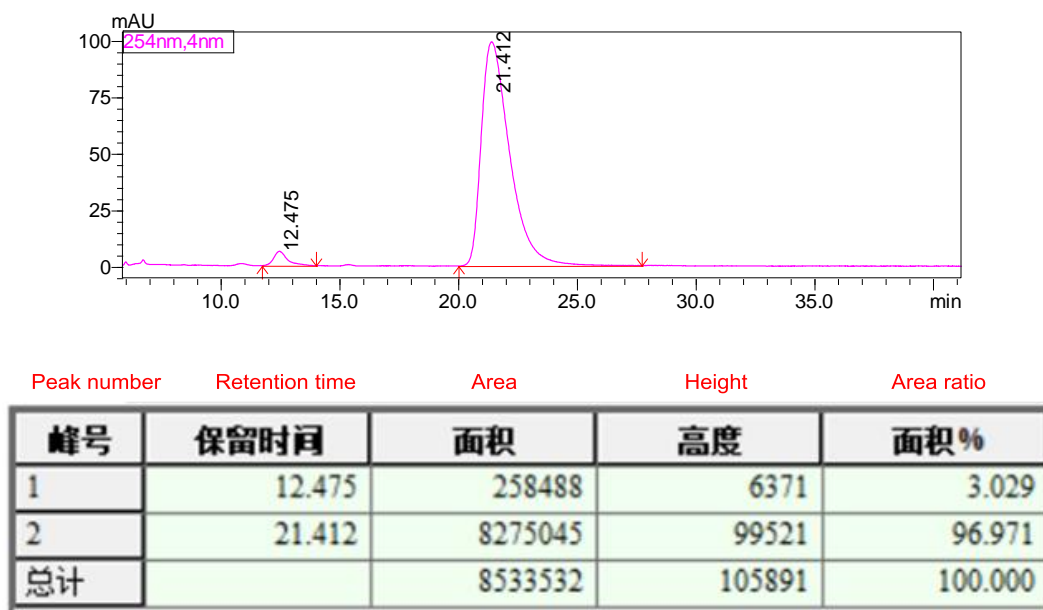

Figure S82. HPLC chromatography of chiral product 43

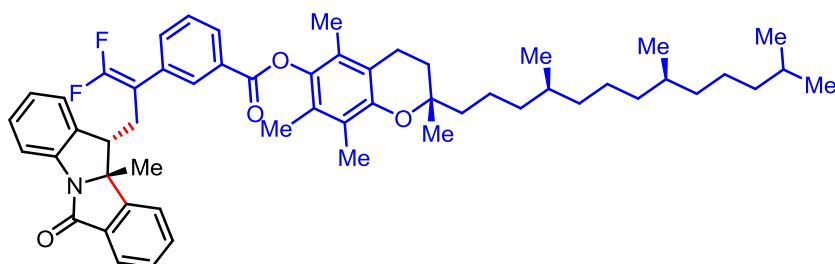

(S)-2,5,7,8-Tetramethyl-2-((4S,8S)-4,8,12-trimethyltridecyl)chroman-6-yl 3-(1,1-



**difluoro-3-((10*bR*,11*S*)-10*b*-methyl-6-oxo-10*b*,11-dihydro-6*H*-isoindolo[2,1-*a*]indol-11-yl)prop-1-en-2-yl)benzoate, **44****

This compound was prepared according to the general procedure **3.2**. Purification by column chromatography on silica gel (Petroleum ether/Ethyl acetate = 7/1, v/v) afforded **44** as colorless oil (107.8 mg, 0.128 mmol, 64% yield).

**<sup>1</sup>H NMR (500 MHz, CDCl<sub>3</sub>):** δ 8.21 (d, *J* = 7.0 Hz, 1H), 8.18 (s, 1H), 7.94 (d, *J* = 7.5 Hz, 1H), 7.73 (d, *J* = 8.0 Hz, 1H), 7.66 (t, *J* = 7.5 Hz, 1H), 7.58 – 7.53 (m, 4H), 7.35 (t, *J* = 7.5 Hz, 1H), 7.18 (d, *J* = 7.5 Hz, 1H), 7.09 (t, *J* = 7.5 Hz, 1H), 3.11 (dd, *J* = 10.0, 4.0 Hz, 1H), 2.65 (t, *J* = 6.5 Hz, 2H), 2.35 – 2.29 (m, 1H), 2.16 (s, 3H), 2.11 (s, 3H), 2.07 (s, 3H), 1.88 – 1.78 (m, 2H), 1.75 – 1.70 (m, 1H), 1.61 – 1.58 (m, 1H), 1.53 – 1.50 (m, 4H), 1.44 – 1.38 (m, 3H), 1.29 – 1.24 (m, 11H), 1.16 – 1.06 (m, 6H), 0.89 – 0.85 (m, 14H) ppm.

**<sup>13</sup>C NMR (126 MHz, CDCl<sub>3</sub>):** δ 167.3, 164.9, 154.4 (t, *J* = 292.4 Hz), 149.7, 147.6, 140.6, 138.3, 137.8, 133.8, 133.5, 133.1, 132.7, 130.4, 129.4, 129.2, 129.1, 128.9, 126.9, 125.8, 125.2, 124.5, 123.4, 123.0, 117.7, 117.5, 88.6 (dd, *J* = 21.9, 13.6 Hz), 75.3, 75.0, 47.4, 40.5, 39.8, 39.5, 37.6, 37.4, 32.92, 32.87, 32.81, 31.4, 31.3, 31.1, 28.1, 27.1, 24.9, 24.6, 24.3, 23.9, 22.9, 22.8, 21.2, 20.8, 19.9, 19.8, 13.3, 12.4, 12.0 ppm.

**<sup>19</sup>F NMR (471 MHz, CDCl<sub>3</sub>):** δ -86.7 (d, *J* = 33.4 Hz), -88.1 (d, *J* = 34.4 Hz) ppm.

**HRMS (ESI<sup>+</sup>):** *m/z*: [M+Na]<sup>+</sup> calcd for C<sub>55</sub>H<sub>67</sub>F<sub>2</sub>NNaO<sub>4</sub><sup>+</sup> 866.4930, found 866.4928.

[α]<sub>D</sub><sup>25</sup> = 10.4° (c = 0.50 in CHCl<sub>3</sub>). The enantiomeric excess was determined by HPLC: d.e. = 98.6:1.4 (Chiralpak ID, *i*-propanol/hexane = 10/90, flow rate 1.0 mL/min, λ = 254 nm); *t*<sub>major</sub> = 9.197 min, *t*<sub>minor</sub> = 8.167 min.

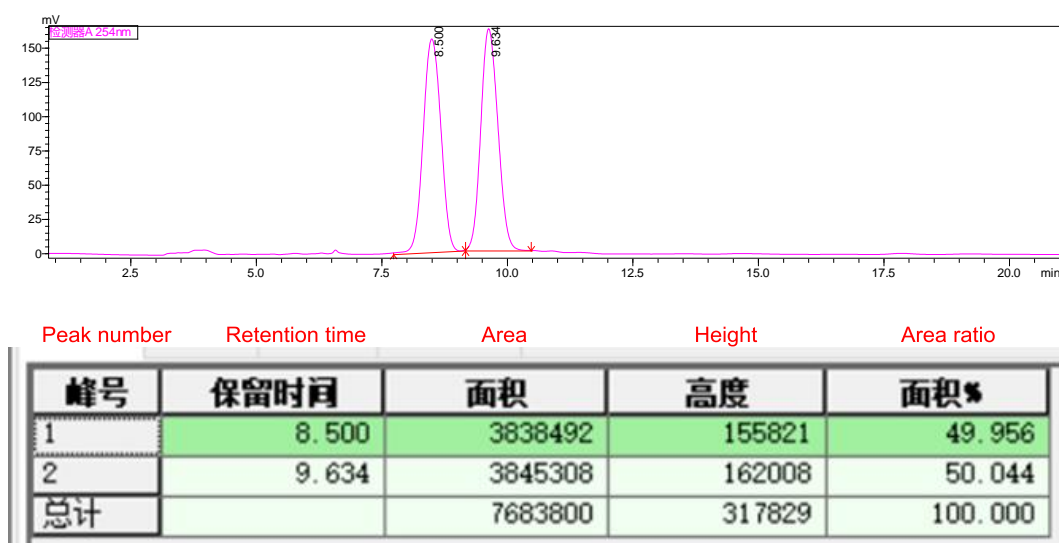

**Figure S83.** HPLC chromatography of the racemic product **44**

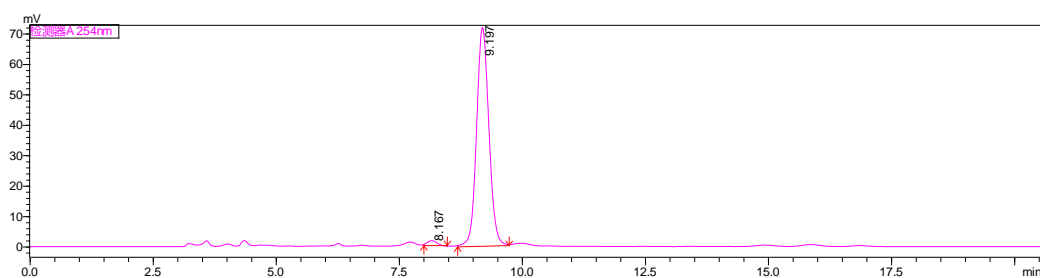

| Peak number | Retention time | Area    | Height | Area ratio |
|-------------|----------------|---------|--------|------------|
| 峰号          | 保留时间           | 面积      | 高度     | 面积%        |
| 1           | 8.167          | 17772   | 1490   | 1.406      |
| 2           | 9.197          | 1246012 | 71736  | 98.594     |
| 总计          |                | 1263784 | 73225  | 100.000    |

Figure S84. HPLC chromatography of chiral product **44**

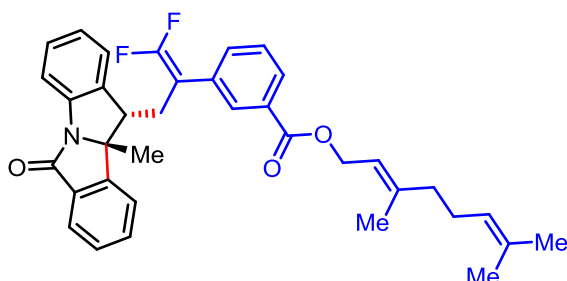

**(E)-3,7-Dimethylocta-2,6-dien-1-yl 3-(1,1-difluoro-3-((10bR,11S)-10b-methyl-6-oxo-10b,11-dihydro-6H-isoindolo[2,1-a]indol-11-yl)prop-1-en-2-yl)benzoate, **45****

This compound was prepared according to the general procedure **3.2**. Purification by column chromatography on silica gel (Petroleum ether/Ethyl acetate = 7/1, v/v) afforded **45** as colorless oil (36.6 mg, 0.064 mmol, 32% yield).

**<sup>1</sup>H NMR (500 MHz, CDCl<sub>3</sub>):** δ 8.01 – 8.00 (m, 2H), 7.95 (d, *J* = 7.5 Hz, 1H), 7.73 (d, *J* = 8.0 Hz, 1H), 7.69 (td, *J* = 7.5, 1.0 Hz, 1H), 7.58 – 7.53 (m, 2H), 7.51 – 7.47 (m, 2H), 7.36 (td, *J* = 8.0, 1.5 Hz, 1H), 7.16 (d, *J* = 7.5 Hz, 1H), 7.09 (td, *J* = 7.5, 1.0 Hz, 1H), 5.54 – 5.51 (m, 1H), 5.12 – 5.10 (m, 1H), 4.91 (d, *J* = 7.0 Hz, 2H), 3.06 (dd, *J* = 10.5, 4.5 Hz, 1H), 2.30 – 2.24 (m, 1H), 2.16 – 2.11 (m, 4H), 1.81 (s, 3H), 1.73 – 1.69 (m, 1H), 1.68 (s, 3H), 1.61 (s, 3H), 1.50 (s, 3H) ppm.

**<sup>13</sup>C NMR (126 MHz, CDCl<sub>3</sub>):** δ 167.3, 166.4, 154.3 (t, *J* = 293.7 Hz), 147.7, 142.9, 138.3, 137.8, 137.8, 133.9, 133.2, 132.6, 132.5, 132.1, 131.3, 129.1, 129.0, 128.85, 128.78, 125.9, 125.2, 124.5, 123.8, 123.1, 118.3, 117.5, 88.6 (dd, *J* = 21.4, 13.6 Hz), 75.0, 62.3, 47.3, 39.7, 31.4, 27.1, 26.4, 25.8, 17.9, 16.8 ppm.

**<sup>19</sup>F NMR (471 MHz, CDCl<sub>3</sub>):** δ -87.1 (d, *J* = 33.9 Hz), -88.3 (d, *J* = 33.9 Hz) ppm.

**HRMS (ESI<sup>+</sup>):** *m/z*: [M+Na]<sup>+</sup> calcd for C<sub>36</sub>H<sub>35</sub>F<sub>2</sub>NNaO<sub>3</sub><sup>+</sup> 590.2477, found 590.2477.

$[\alpha]_D^{25} = 76.0^\circ$  ( $c = 0.10$  in  $\text{CHCl}_3$ ). The enantiomeric excess was determined by HPLC: e.r. = 93.0:7.0 (Chiralpak AD-H, *i*-propanol/hexane = 5/95, flow rate 1.0 mL/min,  $\lambda = 254$  nm);  $t_{\text{major}} = 10.784$  min,  $t_{\text{minor}} = 9.328$  min.

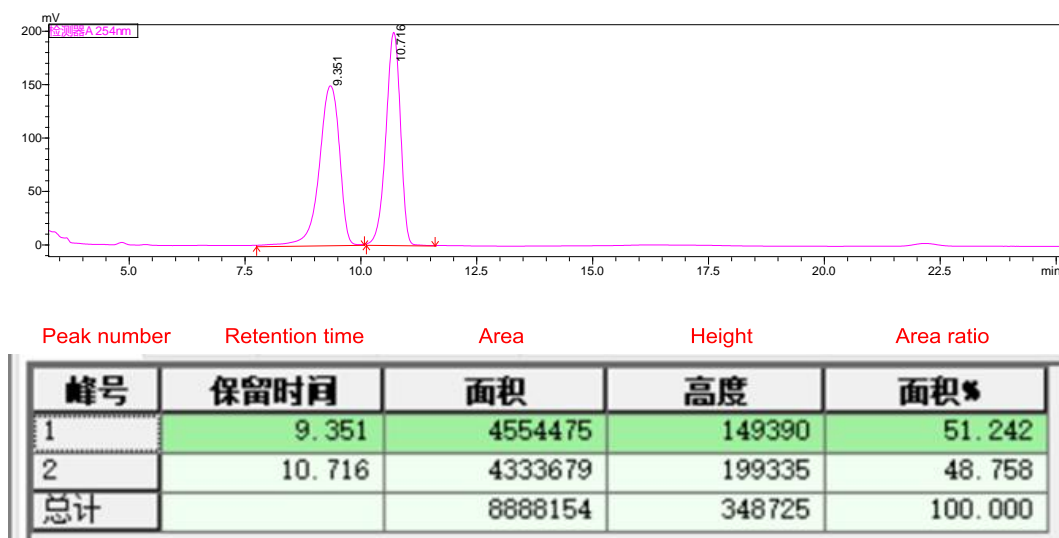

Figure S85. HPLC chromatography of the racemic product 45

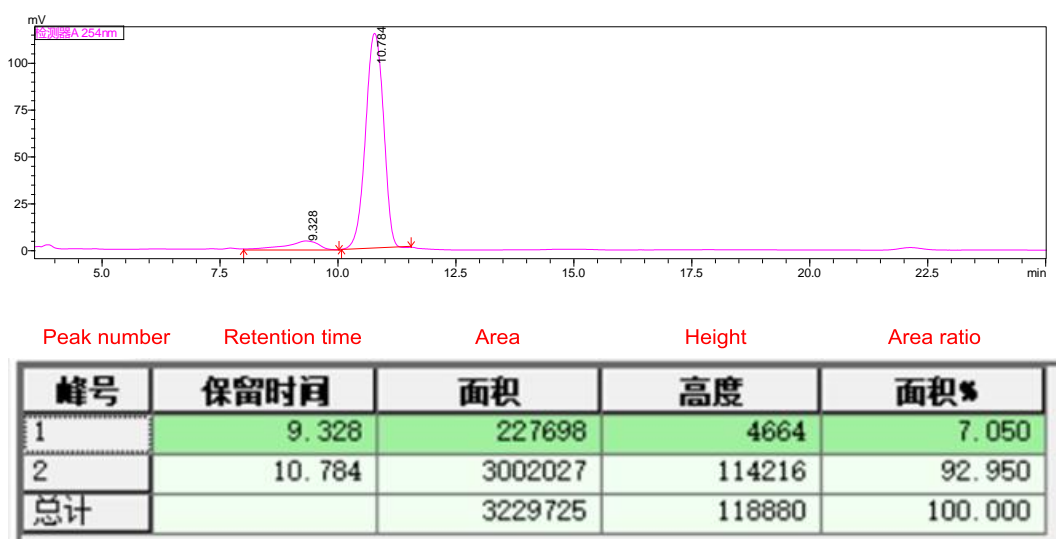

Figure S86. HPLC chromatography of chiral product 45

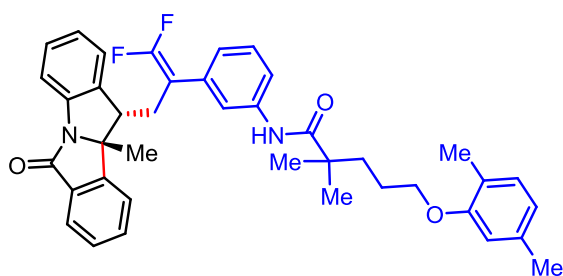

*N*-(3-(1,1-Difluoro-3-((10b*R*,11*S*)-10b-methyl-6-oxo-10b,11-dihydro-6*H*-

**isoindolo[2,1-*a*]indol-11-yl)prop-1-en-2-yl)phenyl)-5-(2,5-dimethylphenoxy)-2,2-dimethylpentanamide, 46**

This compound was prepared according to the general procedure **3.2**. Purification by column chromatography on silica gel (Petroleum ether/Ethyl acetate = 5/1, v/v) afforded **46** as a white solid (64.7 mg, 0.102 mmol, 51% yield). **m.p.** 47.6 – 48.9 °C.

**<sup>1</sup>H NMR (500 MHz, CDCl<sub>3</sub>):** δ 7.91 (d, *J* = 7.5 Hz, 1H), 7.71 (d, *J* = 7.5 Hz, 1H), 7.67 – 7.64 (m, 2H), 7.54 – 7.49 (m, 3H), 7.38 (d, *J* = 8.0 Hz, 1H), 7.32 (t, *J* = 8.0 Hz, 2H), 7.18 (d, *J* = 7.5 Hz, 1H), 7.08 – 7.04 (m, 2H), 6.99 (d, *J* = 7.5 Hz, 1H), 6.65 (d, *J* = 7.5 Hz, 1H), 6.62 (s, 1H), 3.98 – 3.96 (m, 2H), 3.17 (dd, *J* = 11.0, 5.0 Hz, 1H), 2.28 – 2.24 (m, 4H), 2.17 (s, 3H), 1.87 (s, 4H), 1.65 – 1.60 (m, 1H), 1.51 (s, 3H), 1.39 (s, 6H) ppm.

**<sup>13</sup>C NMR (126 MHz, CDCl<sub>3</sub>):** δ 176.0, 167.5, 156.9, 154.2 (dd, *J* = 293.7, 289.7 Hz), 147.9, 138.61, 138.55, 137.8, 136.7, 133.7, 133.5 (t, *J* = 3.7 Hz), 132.6, 130.4, 129.4, 129.0, 128.6, 126.1, 125.0, 124.6, 123.9, 123.5, 123.4, 121.0, 119.9, 119.2, 117.3, 112.2, 88.8 (dd, *J* = 21.3, 13.2 Hz), 75.1, 68.0, 47.3, 43.0, 37.8, 31.4, 27.0, 25.8, 25.7, 25.3, 21.5, 16.0 ppm.

**<sup>19</sup>F NMR (471 MHz, CDCl<sub>3</sub>):** δ -87.5 (d, *J* = 35.3 Hz), -88.3 (d, *J* = 35.3 Hz) ppm.

**HRMS (ESI<sup>+</sup>):** *m/z*: [M+H]<sup>+</sup> calcd for C<sub>40</sub>H<sub>41</sub>F<sub>2</sub>N<sub>2</sub>O<sub>3</sub><sup>+</sup> 635.3080, found 635.3080.

[α]<sub>D</sub><sup>25</sup> = 27.2° (c = 0.50 in CHCl<sub>3</sub>). The enantiomeric excess was determined by HPLC: e.r. = 94.2:5.8 (Chiralpak AD-H, *i*-propanol/hexane = 20/80, flow rate 1.0 mL/min, λ = 254 nm); t<sub>major</sub> = 5.024 min, t<sub>minor</sub> = 6.100 min.

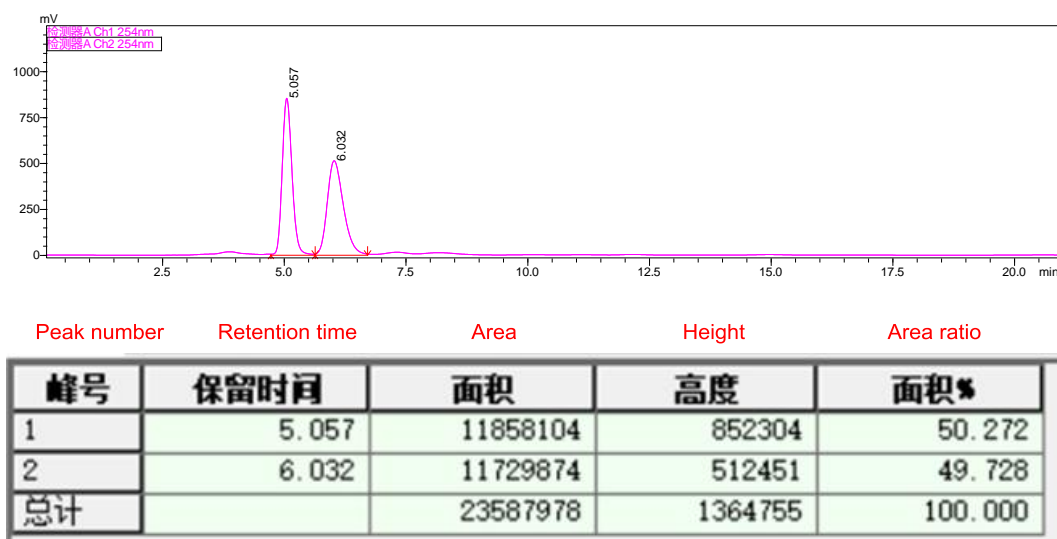

**Figure S87.** HPLC chromatography of the racemic product **46**

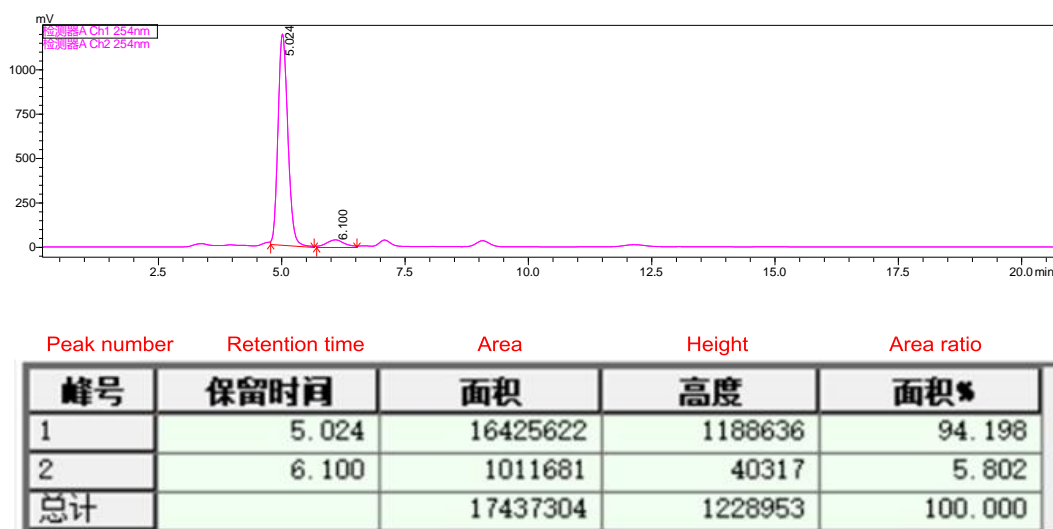

Figure S88. HPLC chromatography of chiral product **46**

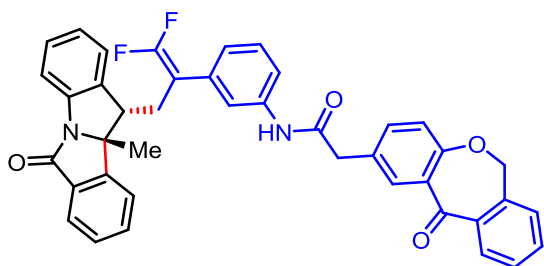

***N*-(3-(1,1-Difluoro-3-((10*b**R*,11*S*)-10*b*-methyl-6-oxo-10*b*,11-dihydro-6*H*-isoindolo[2,1-*a*]indol-11-yl)prop-1-en-2-yl)phenyl)-2-(11-oxo-6,11-dihydrodibenzo[*b*,*e*]oxepin-2-yl)acetamide, **47****

This compound was prepared according to the general procedure **3.2**. Purification by column chromatography on silica gel (Petroleum ether/Ethyl acetate = 2/1, v/v) afforded **47** as a white solid (58.3 mg, 0.089 mmol, 45% yield). **m.p.** 126.9 – 135.2 °C.

**<sup>1</sup>H NMR (500 MHz, CDCl<sub>3</sub>):** δ 8.23 (d, *J* = 2.5 Hz, 1H), 7.97 (s, 1H), 7.91 (d, *J* = 8.0 Hz, 1H), 7.87 (d, *J* = 8.0 Hz, 1H), 7.70 (d, *J* = 8.0 Hz, 1H), 7.65 (t, *J* = 7.0 Hz, 1H), 7.61 (d, *J* = 7.5 Hz, 2H), 7.58 – 7.54 (m, 2H), 7.51 (t, *J* = 7.5 Hz, 1H), 7.46 (t, *J* = 7.5 Hz, 1H), 7.37 (d, *J* = 7.5 Hz, 1H), 7.32 – 7.29 (m, 3H), 7.15 (d, *J* = 7.0 Hz, 1H), 7.08 (d, *J* = 8.5 Hz, 1H), 7.05 – 7.02 (m, 2H), 5.19 (s, 2H), 3.78 (s, 2H), 3.12 (dd, *J* = 10.5, 4.5 Hz, 1H), 2.23 – 2.18 (m, 1H), 1.64 – 1.59 (m, 1H), 1.48 (s, 3H) ppm.

**<sup>13</sup>C NMR (126 MHz, CDCl<sub>3</sub>):** δ 191.1, 169.3, 167.6, 160.8, 154.1 (t, *J* = 290.8 Hz), 147.8, 140.4, 138.5, 137.7, 136.5, 135.6, 133.6, 133.4, 133.0, 132.7, 132.6, 129.5, 129.42, 129.38, 129.0, 128.6, 128.5, 128.0, 126.0, 125.4, 124.9, 124.6, 124.0, 123.4, 121.7, 119.5, 119.0, 117.3, 88.8 (dd, *J* = 21.3, 13.4 Hz), 75.2, 73.7, 47.2, 43.7, 31.3, 26.9 ppm.

$^{19}\text{F}$  NMR (471 MHz,  $\text{CDCl}_3$ ):  $\delta$  -87.7 (d,  $J = 35.3$  Hz), -88.4 (d,  $J = 34.9$  Hz) ppm.

HRMS (ESI $^+$ ):  $m/z$ :  $[\text{M}+\text{Na}]^+$  calcd for  $\text{C}_{41}\text{H}_{30}\text{F}_2\text{N}_2\text{NaO}_4^+$  675.2066, found 675.2064.

$[\alpha]_D^{25} = 76.0^\circ$  ( $c = 0.25$  in  $\text{CHCl}_3$ ). The enantiomeric excess was determined by HPLC: e.r. = 90.9:9.1 (Chiralpak ID, *i*-propanol/hexane = 40/60, flow rate 1.0 mL/min,  $\lambda = 254$  nm);  $t_{\text{major}} = 21.075$  min,  $t_{\text{minor}} = 16.292$  min.

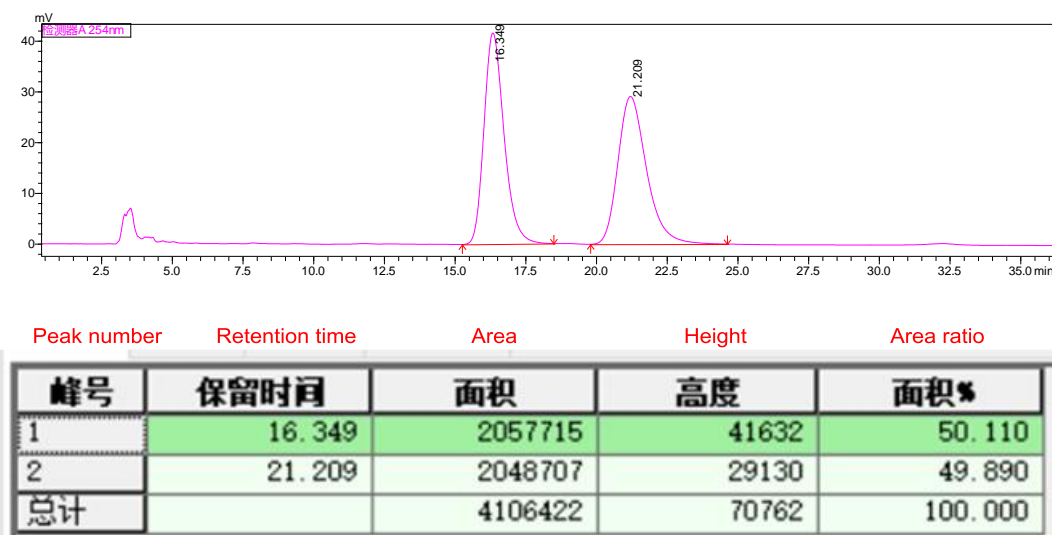

Figure S89. HPLC chromatography of the racemic product 47

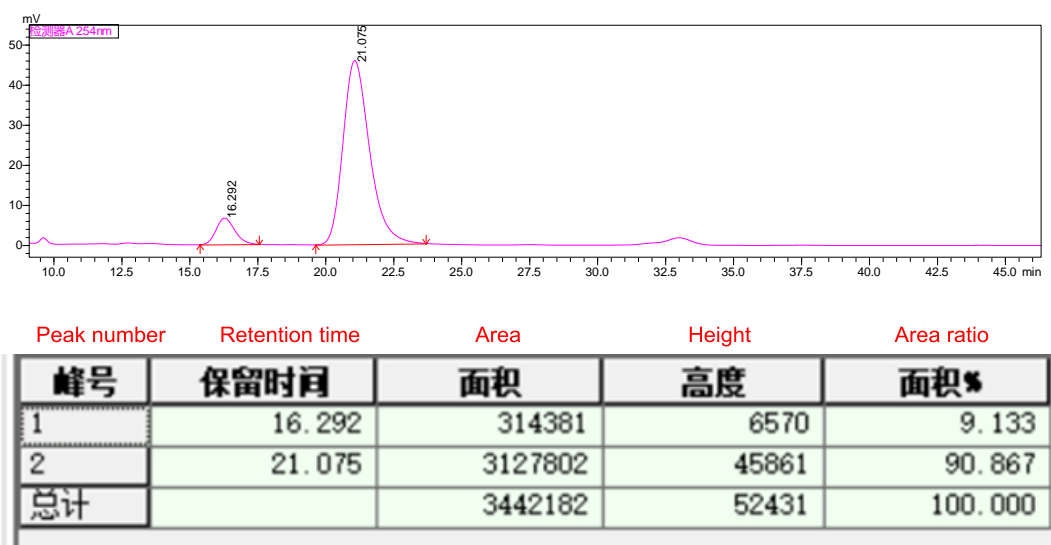

Figure S90. HPLC chromatography of chiral product 47

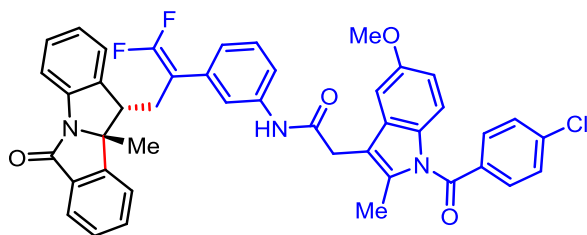

**2-(1-(4-Chlorobenzoyl)-5-methoxy-2-methyl-1*H*-indol-3-yl)-*N*-(3-(1,1-difluoro-3-((10*bR*,11*S*)-10*b*-methyl-6-oxo-10*b*,11-dihydro-6*H*-isoindolo[2,1-*a*]indol-11-yl)prop-1-en-2-yl)phenyl)acetamide, 48**

This compound was prepared according to the general procedure **3.2**. Purification by column chromatography on silica gel (Petroleum ether/Ethyl acetate = 5/1 to 2/1, v/v) afforded **48** as a white solid (79.4 mg, 0.107 mmol, 53% yield). **m.p.** 53.1 – 55.2 °C.

**<sup>1</sup>H NMR (500 MHz, CDCl<sub>3</sub>):** δ 7.89 (d, *J* = 7.5 Hz, 1H), 7.71 (s, 1H), 7.68 – 7.64 (m, 4H), 7.59 (d, *J* = 7.5 Hz, 1H), 7.53 (t, *J* = 7.5 Hz, 1H), 7.49 – 7.47 (m, 3H), 7.29 (d, *J* = 8.0 Hz, 1H), 7.26 (d, *J* = 8.5 Hz, 1H), 7.21 (d, *J* = 8.0 Hz, 1H), 7.14 (d, *J* = 7.5 Hz, 1H), 7.04 (t, *J* = 7.5 Hz, 3H), 6.92 (d, *J* = 9.0 Hz, 1H), 6.74 (dd, *J* = 9.0, 2.5 Hz, 1H), 3.86 (s, 2H), 3.81 (s, 3H), 3.13 (dd, *J* = 10.5, 5.0 Hz, 1H), 2.49 (s, 3H), 2.25 – 2.19 (m, 1H), 1.65 – 1.59 (m, 1H), 1.50 (s, 3H) ppm.

**<sup>13</sup>C NMR (126 MHz, CDCl<sub>3</sub>):** δ 168.6, 168.5, 167.5, 156.4, 154.1 (dd, *J* = 293.3, 289.7 Hz), 147.8, 139.7, 138.5, 138.2, 137.7, 136.8, 133.7, 133.6, 133.5 (t, *J* = 4.2 Hz), 132.7, 131.3, 131.1, 130.4, 129.4, 129.3, 129.0, 128.6, 126.0, 125.0, 124.5, 124.2, 123.3, 119.7, 119.2, 117.3, 115.3, 112.5, 112.3, 101.2, 88.7 (dd, *J* = 21.3, 13.1 Hz), 75.1, 55.9, 47.2, 33.5, 31.3, 27.0, 13.6 ppm.

**<sup>19</sup>F NMR (471 MHz, CDCl<sub>3</sub>):** δ -88.35 (d, *J* = 36.3 Hz), -89.44 (dd, *J* = 36.3, 3.8 Hz) ppm.

**HRMS (ESI<sup>+</sup>):** *m/z*: [M+Na]<sup>+</sup> calcd for C<sub>44</sub>H<sub>34</sub>ClF<sub>2</sub>N<sub>3</sub>NaO<sub>4</sub><sup>+</sup> 764.2098, found 764.2098.

The enantiomeric excess was determined by HPLC: e.r. = 94.1:5.9 (Chiralpak AD-H, *i*-propanol/hexane = 40/60, flow rate 1.0 mL/min, λ = 254 nm); *t*<sub>major</sub> = 21.178 min, *t*<sub>minor</sub> = 15.534 min. [α]<sub>D</sub><sup>25</sup> = 27.2° (c = 0.50 in CHCl<sub>3</sub>).

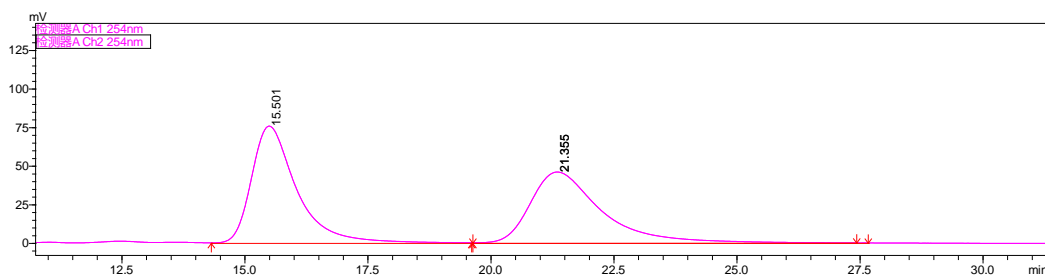

| Peak number | Retention time | Area    | Height | Area ratio |
|-------------|----------------|---------|--------|------------|
| 峰号          | 保留时间           | 面积      | 高度     | 面积%        |
| 1           | 15.501         | 4826172 | 75731  | 51.228     |
| 2           | 21.355         | 4594818 | 45985  | 48.772     |
| 总计          |                | 9420989 | 121716 | 100.000    |

Figure S91. HPLC chromatography of the racemic product 48

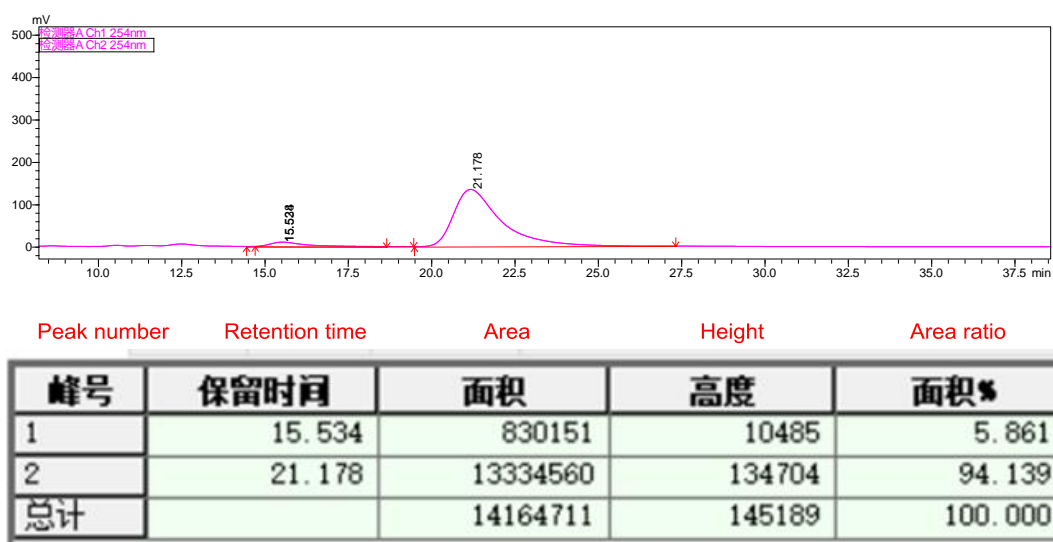

Figure S92. HPLC chromatography of chiral product 48

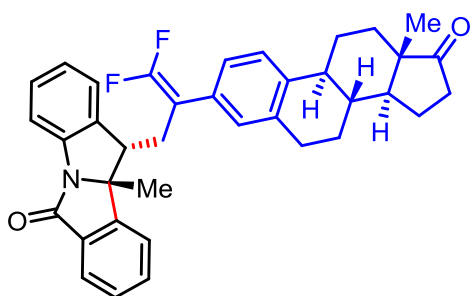

(10bR,11S)-11-(3,3-Difluoro-2-((8R,9S,13S,14S)-13-methyl-17-oxo-7,8,9,11,12,13,14,15,16,17-decahydro-6H-cyclopenta[a]phenanthren-3-yl)allyl)-10b-methyl-10b,11-dihydro-6H-isoindolo[2,1-a]indol-6-one, 49

This compound was prepared according to the general procedure 3.2. Purification by column chromatography on silica gel (Petroleum ether/Ethyl acetate = 5/1 to 3/1, v/v) afforded 49 as a white solid (59.6 mg, 0.106 mmol, 53% yield). **m.p.** 137.1 – 139.9 °C.

**<sup>1</sup>H NMR (500 MHz, CDCl<sub>3</sub>):** δ 7.93 (d, *J* = 7.5 Hz, 1H), 7.73 (d, *J* = 7.5 Hz, 1H), 7.68 (td, *J* = 7.0, 1.0 Hz, 1H), 7.55 (t, *J* = 7.5 Hz, 1H), 7.50 (d, *J* = 7.5 Hz, 1H), 7.37 – 7.32 (m, 2H), 7.19 (d, *J* = 7.5 Hz, 1H), 7.10 (td, *J* = 7.5, 1.0 Hz, 1H), 7.04 (d, *J* = 8.0 Hz, 1H), 6.93 (s, 1H), 3.11 (dd, *J* = 11.0, 5.0 Hz, 1H), 2.95 – 2.93 (m, 1H), 2.55 – 2.53 (m, 1H), 2.46 – 2.43 (m, 1H), 2.33 (td, *J* = 11.0, 4.0 Hz, 1H), 2.23 – 2.06 (m, 4H), 2.01 – 1.98 (m, 1H), 1.70 – 1.52 (m, 8H), 1.51 (s, 3H), 0.93 (s, 3H) ppm.

**<sup>13</sup>C NMR (126 MHz, CDCl<sub>3</sub>):** δ 220.9, 167.3, 154.1 (dd, *J* = 292.4, 289.7 Hz), 147.8, 139.3, 138.5, 137.8, 137.1, 133.9, 132.5, 130.3 (t, *J* = 3.2 Hz), 129.0, 128.8, 128.7,



126.1, 125.9, 125.3, 125.1, 124.4, 123.0, 117.4, 88.7 (dd,  $J = 20.9, 14.1$  Hz), 75.0, 50.6, 48.1, 47.4, 44.5, 38.1, 36.0, 31.7, 31.6, 29.6, 27.0, 26.5, 25.7, 21.7, 14.0 ppm.

$^{19}\text{F}$  NMR (471 MHz,  $\text{CDCl}_3$ ):  $\delta$  -88.8 (d,  $J = 37.7$  Hz), -89.8 (d,  $J = 37.7$  Hz) ppm.

HRMS (ESI<sup>+</sup>):  $m/z$ :  $[\text{M}+\text{Na}]^+$  calcd for  $\text{C}_{37}\text{H}_{35}\text{F}_2\text{NNaO}_2^+$  586.2528, found 586.2528.

$[\alpha]_D^{25} = 103.2^\circ$  ( $c = 0.50$  in  $\text{CHCl}_3$ ). The enantiomeric excess was determined by HPLC: d.e. = 99.4:0.6 (Chiralpak AD-H, *i*-propanol/hexane = 20/80, flow rate 1.0 mL/min,  $\lambda = 254$  nm);  $t_{\text{major}} = 11.132$  min,  $t_{\text{minor}} = 6.849$  min.

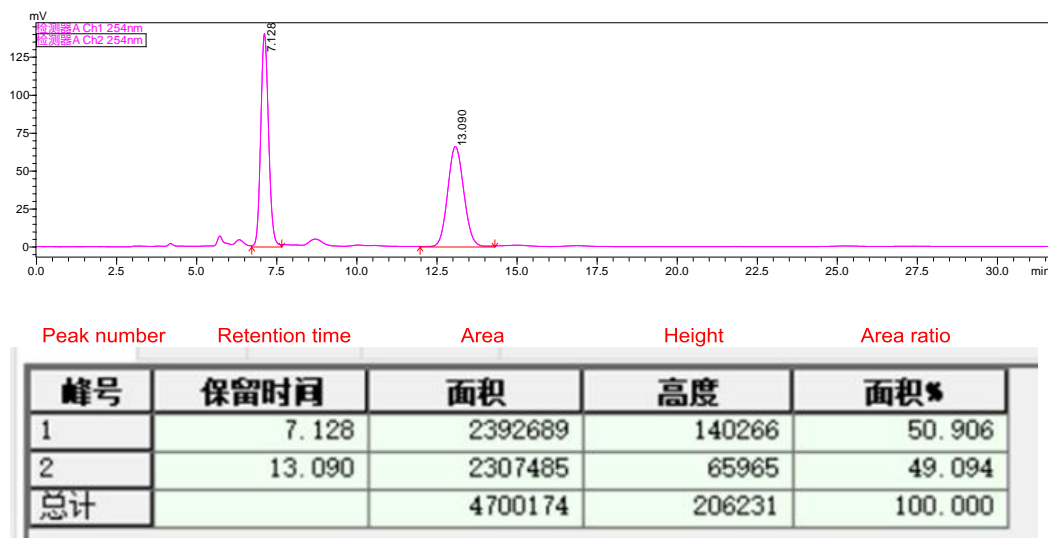

Figure S93. HPLC chromatography of the racemic product 49

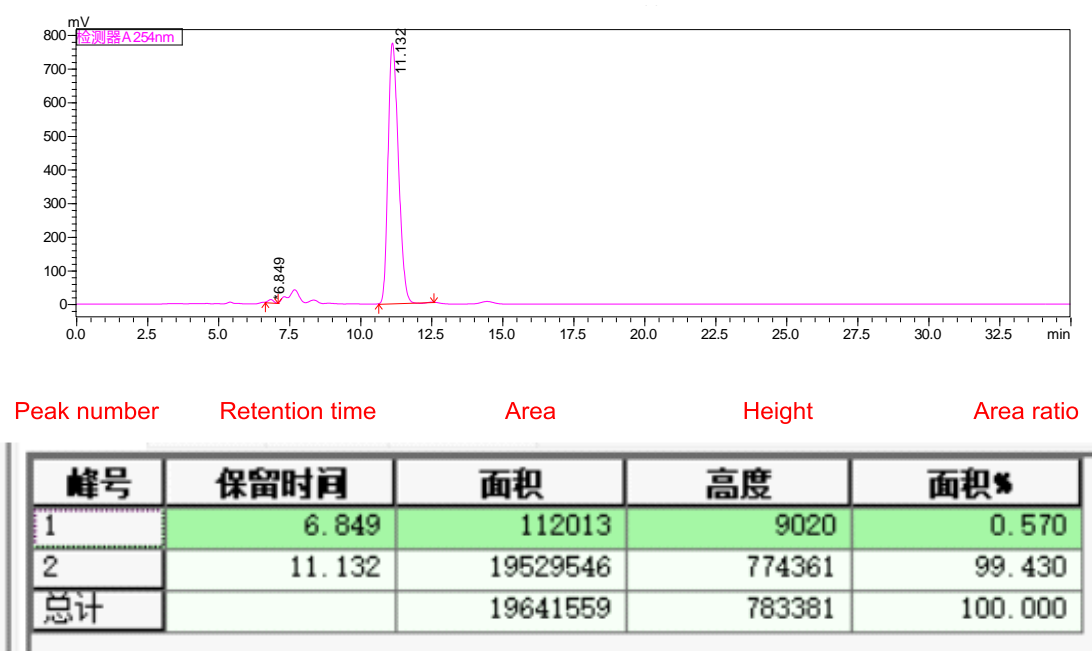

Figure S94. HPLC chromatography of chiral product 49

## 5. Gram-Scale Synthesis and Further Derivatizations

### 5.1 Gram-Scale Synthesis of Product 3

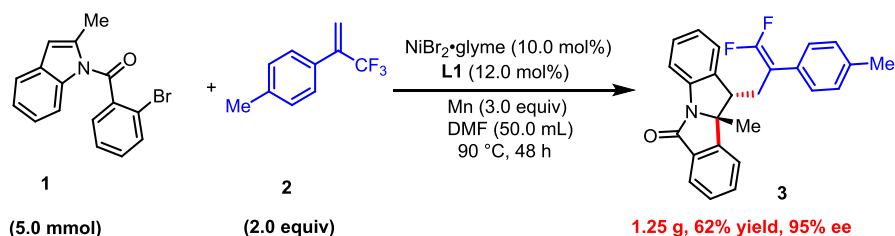

An oven-dried Schlenk tube (250 mL) was charged with NiBr<sub>2</sub>·glyme (0.5 mmol, 154.3 mg, 10.0 mol%), **L1** (0.6 mmol, 198.8 mg, 12.0 mol%), Mn dust (15.0 mmol, 824.0 mg, 3.0 equiv.), **1** (5.0 mmol, 1.0 equiv, 1.57 g), **2** (10.0 mmol, 2.0 equiv, 1.86 g), and DMF (50.0 mL). The reaction mixture was allowed to stir under N<sub>2</sub> atmosphere at 90 °C (oil bath) for 48 h. After this time, the tube was cooled to room temperature then the reaction mixture was vacuumed to remove the volatiles. The residue was diluted with DCM (~50 mL) and filtered through a triangular suction filter funnel with a thin layer of celite, and the filtrate was concentrated under vacuum. The crude mixture was then purified by column chromatography on silica gel (Petroleum ether/Ethyl acetate = 10:1 to 7:1, v/v) to afford the desired product **3** as a yellow solid (1.25 g, 62%, 95% ee). The enantiomeric excess was determined by HPLC: e.r. = 97.7:2.3 (Chiralpak AD-H, *i*-propanol/hexane = 5/95, flow rate 1.0 mL/min, λ = 254 nm); *t*<sub>major</sub> = 18.841 min, *t*<sub>minor</sub> = 15.363 min.

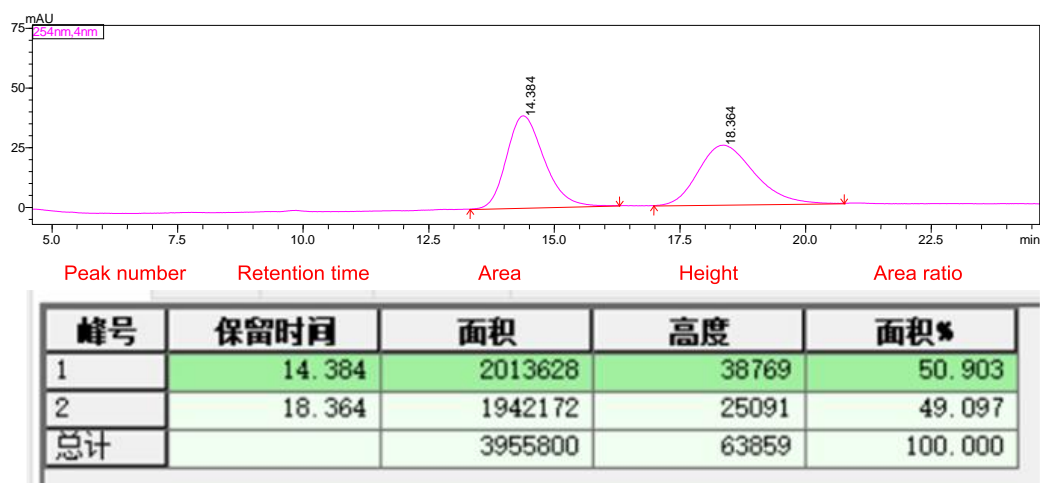

Figure S95. HPLC chromatography of the racemic product **3**

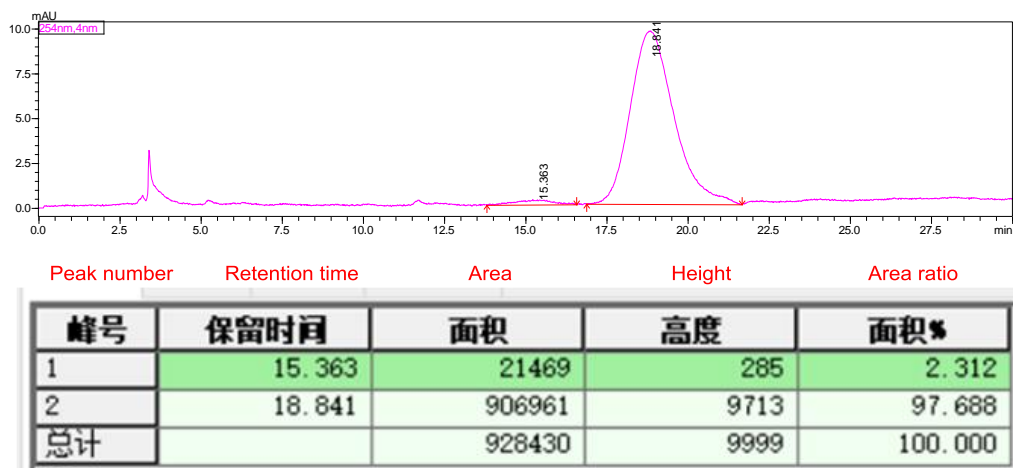

Figure S96. HPLC chromatography of chiral product **3**

## 5.2 Further Transformations of **3**<sup>9-10</sup>

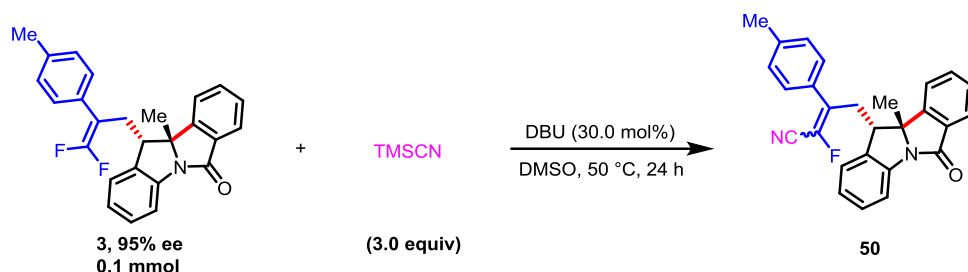

To a solution of **3** (0.1 mmol, 1.0 equiv, 40.1 mg) and trimethylsilyl cyanide (0.3 mmol, 3.0 equiv, 29.8 mg) in 2.0 mL anhydrous DMSO was added DBU (4.6 mg, 30.0 mol%). The mixture was stirred at 50 °C for 24 h. After completion of the reaction, the reaction mixture was vacuumed to remove the volatiles. The residue was diluted with DCM (~10 mL) and filtered through a triangular suction filter funnel with a thin layer of celite, and the filtrate was concentrated under vacuum. The crude product was purified by column chromatography on silica gel, eluting with petroleum ether/ethyl acetate = 10:1 (v/v) to afford the product **50** as colorless oil (31.0 mg, 0.076 mmol, 76% yield, E/Z = 1.1:1).

**<sup>1</sup>H NMR (500 MHz, CDCl<sub>3</sub>):** δ 7.95 (m, 1H), 7.76 – 7.67 (m, 2H), 7.60 – 7.53 (m, 1.5H), 7.48 (d, *J* = 8.0 Hz, 0.5H), 7.40 – 7.36 (m, 1H), 7.27 – 7.26 (m, 2H), 7.22 (d, *J* = 8.0 Hz, 1H), 7.19 – 7.02 (m, 3H), 3.12 (dd, *J* = 10.5, 4.5 Hz, 1H), 2.53 (dt, *J* = 14.5, 4.5 Hz, 0.5H), 2.40 (d, *J* = 3.5 Hz, 3H), 2.36 (dt, *J* = 14.0, 4.5 Hz, 0.5H), 1.80 – 1.75 (m, 1H), 1.50 (d, *J* = 6.5 Hz, 3H) ppm.

**<sup>13</sup>C NMR (126 MHz, CDCl<sub>3</sub>):** δ 167.1, 166.8, 147.31, 147.26, 140.6, 140.5, 137.9, 137.8, 137.7, 137.0, 136.9, 136.8, 133.9, 133.8, 133.3 (d, *J* = 8.4 Hz), 132.75, 132.68, 131.1 (d, *J* = 6.9 Hz), 130.2, 129.9, 129.34, 129.31, 129.2, 129.1, 128.85, 128.83, 128.3 (d, *J* = 4.8 Hz), 128.0 (d, *J* = 2.6 Hz), 126.2, 125.6, 125.5, 125.3, 124.7, 124.4, 123.0,

117.7, 112.6 (d,  $J = 47.4$  Hz), 111.5 (d,  $J = 47.6$  Hz), 75.02, 74.96, 48.0 (d,  $J = 2.5$  Hz), 47.1 (d,  $J = 2.3$  Hz), 35.5, 34.5, 27.0, 26.8, 21.49, 21.45 ppm.

**$^{19}\text{F}$  NMR (471 MHz,  $\text{CDCl}_3$ ):**  $\delta$  -121.8 (s), -125.0 (d,  $J = 2.4$  Hz) ppm.

**HRMS (ESI<sup>+</sup>):**  $m/z$ :  $[\text{M}+\text{Na}]^+$  calcd for  $\text{C}_{27}\text{H}_{21}\text{FN}_2\text{NaO}^+$  431.1530, found 431.1538.

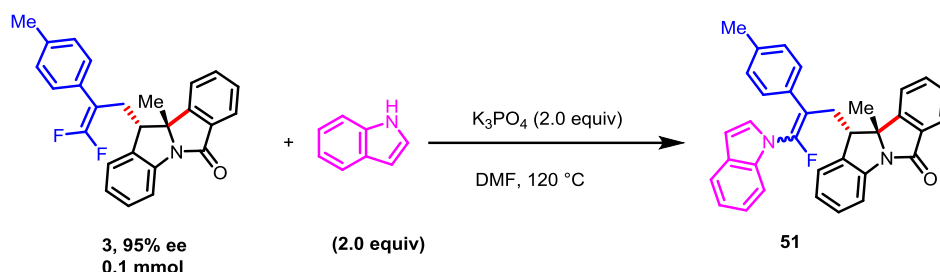

An oven-dried Schlenk tube (20 mL) was charged with indole (0.2 mmol, 2.0 equiv, 23.4 mg), **3** (0.1 mmol, 1.0 equiv, 40.1 mg),  $\text{K}_3\text{PO}_4$  (0.2 mmol, 2.0 equiv, 42.6 mg) and DMF (1.0 mL). Then the reaction was stirred at  $120^\circ\text{C}$  for 24 h. After completion of the reaction, the reaction mixture was vacuumed to remove the volatiles. The residue was diluted with DCM (~10 mL) and filtered through a triangular suction filter funnel with a thin layer of celite, and the filtrate was concentrated under vacuum. The crude mixture was then purified by column chromatography on silica gel (Petroleum ether/Ethyl acetate = 10:1, v/v) to afford **51** as a white solid (38.9 mg, 0.078 mmol, 78% yield, 94 % ee, E/Z = 6.5:1). **m.p.** 87.2 – 91.4  $^\circ\text{C}$ .

**$^1\text{H}$  NMR (500 MHz,  $\text{CDCl}_3$ ):**  $\delta$  7.97 (d,  $J = 7.5$  Hz, 1H), 7.81 (d,  $J = 7.5$  Hz, 1H), 7.71 (t,  $J = 7.5$  Hz, 1H), 7.59 – 7.52 (m, 3H), 7.46 (t,  $J = 7.5$  Hz, 1H), 7.30 (d,  $J = 7.0$  Hz, 1H), 7.22 – 7.19 (m, 3H), 7.16 – 7.13 (m, 1H), 6.98 (d,  $J = 7.5$  Hz, 2H), 6.74 (d,  $J = 8.0$  Hz, 2H), 6.54 (d,  $J = 3.5$  Hz, 1H), 6.36 (d,  $J = 3.5$  Hz, 1H), 3.13 (dd,  $J = 12.0, 4.0$  Hz, 1H), 2.47 (dt,  $J = 14.0, 4.0$  Hz, 1H), 2.26 (s, 3H), 1.99 (t,  $J = 12.5$  Hz, 1H), 1.52 (s, 3H) ppm.  $[\alpha]_D^{25} = 48.8^\circ$  (c = 0.5 in  $\text{CHCl}_3$ ).

**$^{13}\text{C}$  NMR (126 MHz,  $\text{CDCl}_3$ ):** 167.3, 148.1, 146.0 (d,  $J = 266.2$  Hz), 138.5, 138.0, 137.5, 135.9, 134.0, 132.6, 131.9 (d,  $J = 3.2$  Hz), 129.7, 129.0, 128.9, 128.7, 127.6, 127.5, 126.5, 125.3, 124.2, 123.1, 123.0, 121.4, 121.3, 121.0, 117.5, 110.5 (d,  $J = 27.7$  Hz), 105.1, 75.2, 47.3, 33.6, 27.0, 21.3.

**$^{19}\text{F}$  NMR (471 MHz,  $\text{CDCl}_3$ ):** -87.7 (s, minor), -88.7 (s, major).

**HRMS (ESI<sup>+</sup>):**  $m/z$ :  $[\text{M}+\text{Na}]^+$  calcd for  $\text{C}_{34}\text{H}_{27}\text{FN}_2\text{NaO}^+$  521.2000, found 521.1994.

The enantiomeric excess was determined by HPLC: e.r. = 97.0:3.0 (Chiralpak AD-H, *i*-propanol/hexane = 5/95, flow rate 1.0 mL/min,  $\lambda = 254$  nm);  $t_{\text{major}} = 22.194$  min,  $t_{\text{minor}} = 11.005$  min.

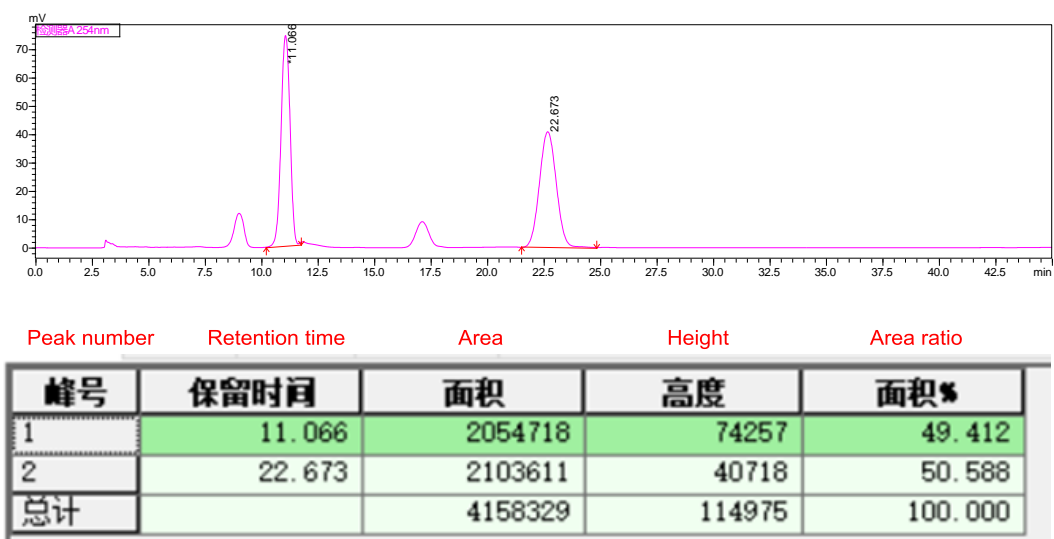

Figure S97. HPLC chromatography of the racemic product 51

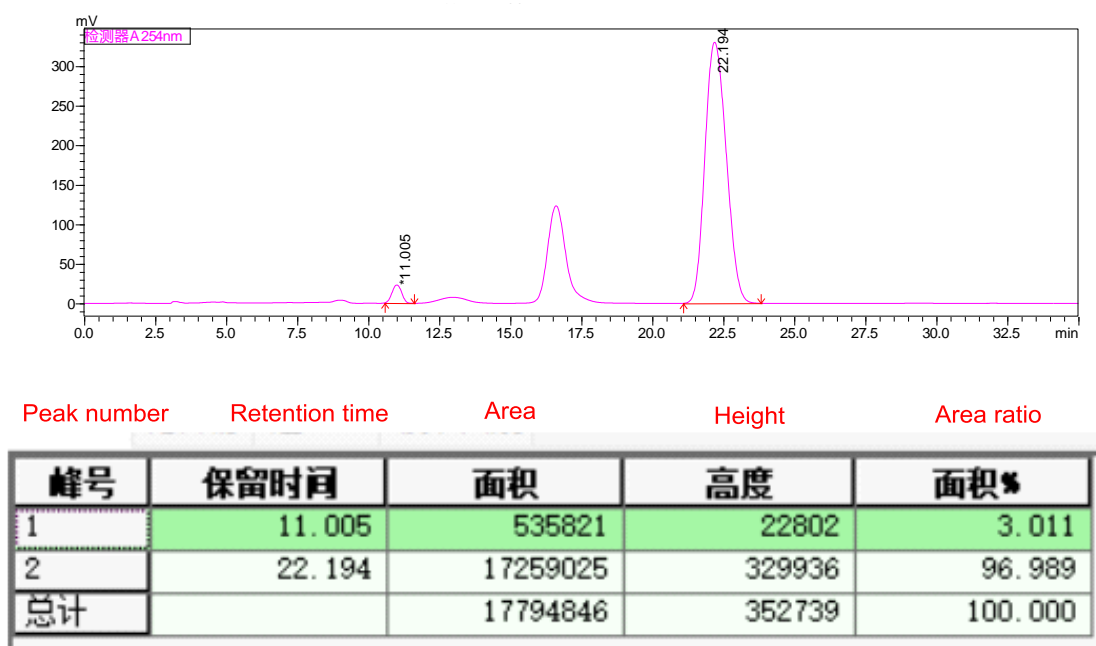

Figure S98. HPLC chromatography of chiral product 51

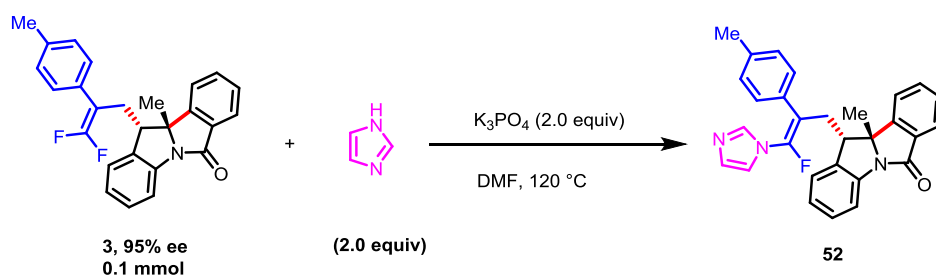

An oven-dried Schlenk tube (20 mL) was charged with azole (0.2 mmol, 2.0 equiv,

20.2 mg), **3** (0.1 mmol, 1.0 equiv, 40.1 mg), K<sub>3</sub>PO<sub>4</sub> (0.2 mmol, 2.0 equiv, 42.6 mg) and DMF (1.0 mL). Then the reaction was stirred at 120 °C for 24 h. After completion of the reaction, the reaction mixture was vacuumed to remove the volatiles. The residue was diluted with DCM (~10 mL) and filtered through a triangular suction filter funnel with a thin layer of celite, and the filtrate was concentrated under vacuum. The crude mixture was then purified by column chromatography on silica gel (Petroleum ether/Ethyl acetate = 3:1 to 2:1, v/v) to afford the product **52** as light yellow oil (32.8 mg, 0.073 mmol, 73% yield, 95 % ee). [ $\alpha$ ]<sub>D</sub><sup>25</sup> = 60.8° (c = 0.25 in CHCl<sub>3</sub>).

**<sup>1</sup>H NMR (500 MHz, CDCl<sub>3</sub>):**  $\delta$  7.96 (d, *J* = 7.5 Hz, 1H), 7.77 (d, *J* = 8.0 Hz, 1H), 7.69 (t, *J* = 7.5 Hz, 1H), 7.58 (t, *J* = 7.5 Hz, 1H), 7.50 (d, *J* = 7.5 Hz, 1H), 7.40 (t, *J* = 7.5 Hz, 1H), 7.23 (d, *J* = 7.5 Hz, 1H), 7.16 – 7.10 (m, 4H), 6.96 (br, 1H), 6.83 (d, *J* = 8.0 Hz, 2H), 6.72 (br, 1H), 3.12 (dd, *J* = 10.5, 5.0 Hz, 1H), 2.37 – 2.33 (m, 4H), 1.97 – 1.92 (m, 1H), 1.51 (s, 3H) ppm.

**<sup>13</sup>C NMR (126 MHz, CDCl<sub>3</sub>):**  $\delta$  167.2, 147.7, 138.5, 138.3, 138.0, 134.0, 132.5, 130.21, 131.18, 130.1, 129.1, 128.9, 127.79, 127.76, 125.8, 125.2, 124.2, 123.1, 117.6, 110.6 (d, *J* = 23.6 Hz), 75.1, 47.1, 34.2, 26.9, 21.3 ppm.

**<sup>19</sup>F NMR (471 MHz, CDCl<sub>3</sub>):**  $\delta$  -91.5 (s) ppm.

**HRMS (ESI<sup>+</sup>):** *m/z*: [M+H]<sup>+</sup> calcd for C<sub>29</sub>H<sub>25</sub>FN<sub>3</sub>O<sup>+</sup> 450.1976, found 450.1974.

The enantiomeric excess was determined by HPLC: e.r. = 97.3:2.7 (Chiralpak AD-H, *i*-propanol/hexane = 30/70, flow rate 1.0 mL/min,  $\lambda$  = 254 nm); *t*<sub>major</sub> = 13.623 min, *t*<sub>minor</sub> = 7.018 min.

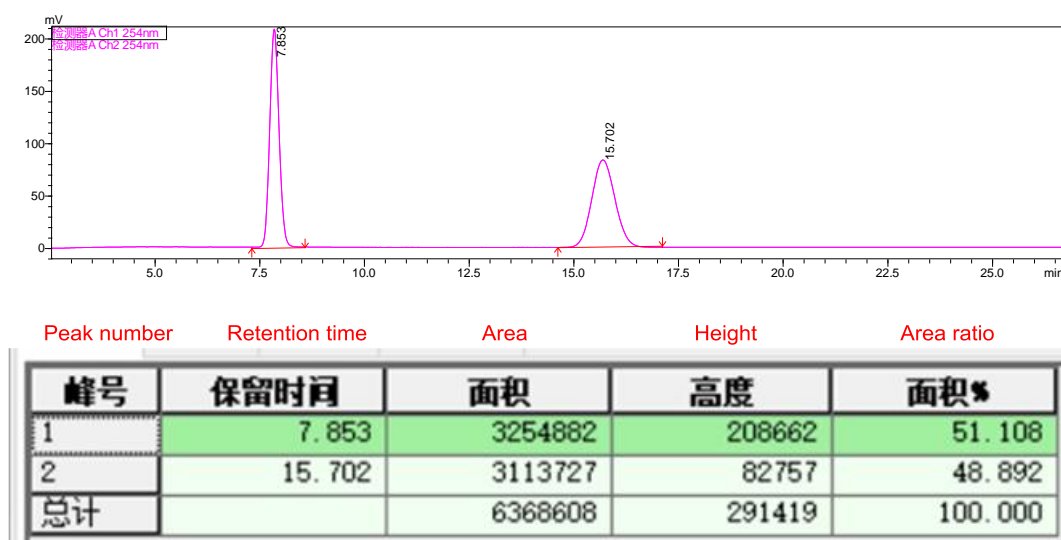

**Figure S99.** HPLC chromatography of the racemic product **52**

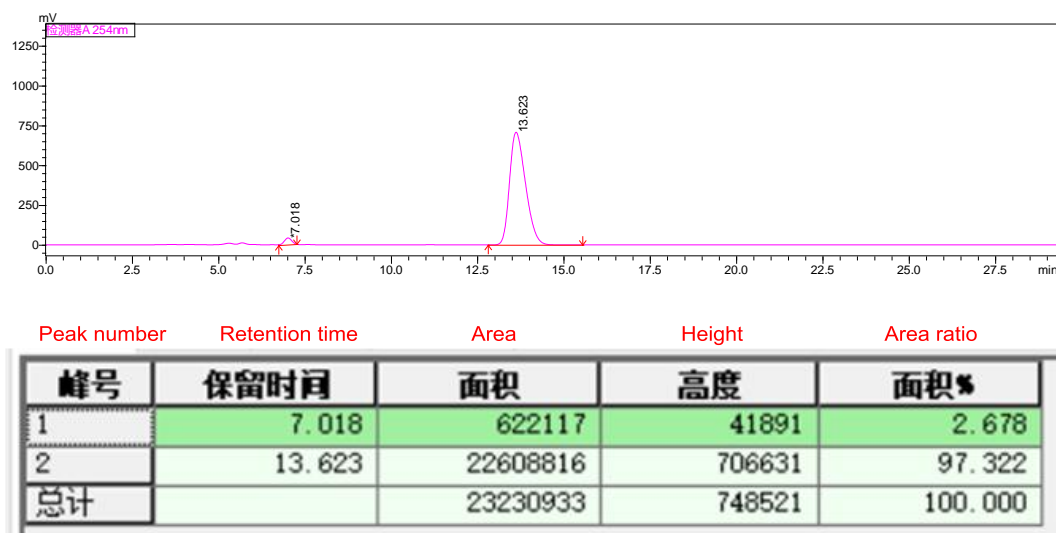

Figure S100. HPLC chromatography of chiral product **52**

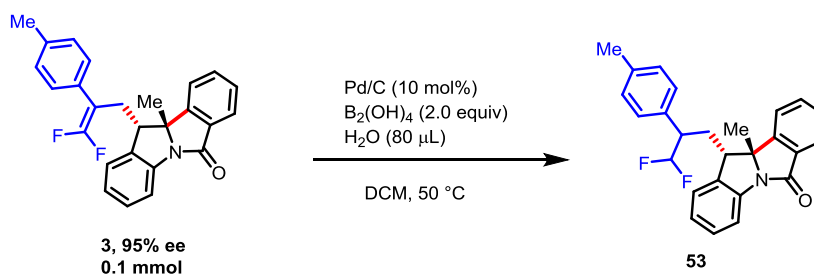

An oven-dried Schlenk tube (10 mL) was charged with tetrahydroxydiboron (0.2 mmol, 2.0 equiv, 17.9 mg), and Pd/C (0.01 mmol, 0.1 equiv, 10% wt, 10.2 mg). The tube was capped with a septum, degassed and backfilled with argon. The vial was charged with 2.0 mL of dichloromethane followed with *gem*-difluoroalkene **3** (0.12 mmol, 41.4 mg) and 80 μL of water. The mixture was heated at 50 °C for 36 h (monitored by TLC). The solution was then filtered through a celite plug and washed with DCM. The crude product was purified by column chromatography on silica gel, eluting with petroleum ether/ethyl acetate = 10:1 (v/v) to afford the product **53** as inseparable mixture of diastereoisomers (colorless oil, 27.8 mg, 0.069 mmol, 69%, dr = 1.3:1)

**<sup>1</sup>H NMR (500 MHz, CDCl<sub>3</sub>):** δ 7.94 (d, *J* = 7.5 Hz, 1H), 7.89 (d, *J* = 7.5 Hz, 1.3H), 7.75 – 7.66 (m, 5H), 7.58 – 7.51 (m, 4H), 7.48 (t, *J* = 7.5 Hz, 1H), 7.39 – 7.33 (m, 2.4H), 7.29 – 7.28 (m, 3.5H), 7.20 – 7.19 (m, 3H), 7.13 (t, *J* = 7.5 Hz, 2.5H), 7.07 (t, *J* = 8.0 Hz, 2.7H), 6.90 (t, *J* = 7.5 Hz, 2.7H), 5.80 – 5.33 (m, 1.5H), 3.28 – 3.25 (m, 1.3H), 3.07 – 2.98 (m, 2H), 2.90 (dd, *J* = 12.5, 3.5 Hz, 1H), 2.41 (s, 3H), 2.28 (s, 3.8H), 1.75 – 1.67 (m, 3.9H), 1.53 (s, 4H), 1.43 (s, 3H) ppm.

**<sup>13</sup>C NMR (126 MHz, CDCl<sub>3</sub>):** δ 167.2, 167.1, 147.9, 147.7, 139.6, 138.4, 138.0, 137.83, 137.78, 137.6, 134.0, 138.9, 132.7, 132.5, 132.0, 131.9, 130.0, 129.7, 129.2, 129.1, 128.8, 128.6, 128.4, 126.3, 126.2, 125.2, 125.1, 124.6, 124.3, 123.3, 122.9, 118.2, 117.9, 117.6, 75.52, 75.49, 47.7, 46.2, 33.4, 30.7, 27.2, 26.8, 21.3, 21.1 ppm.

**<sup>19</sup>F NMR (471 MHz, CDCl<sub>3</sub>):** -114.8 (dd, *J* = 56.0, 13.2 Hz), -115.4 (dd, *J* = 56.5, 13.2 Hz), -120.7 (dd, *J* = 56.5, 15.1 Hz), -122.7 (dd, *J* = 57.0, 17.9 Hz), -123.2 (dd, *J* = 56.5, 17.4 Hz) ppm.

**HRMS (ESI<sup>+</sup>):** *m/z*: [M+H]<sup>+</sup> calcd for C<sub>26</sub>H<sub>23</sub>F<sub>2</sub>NONa<sup>+</sup> 426.1640, found 426.1635.

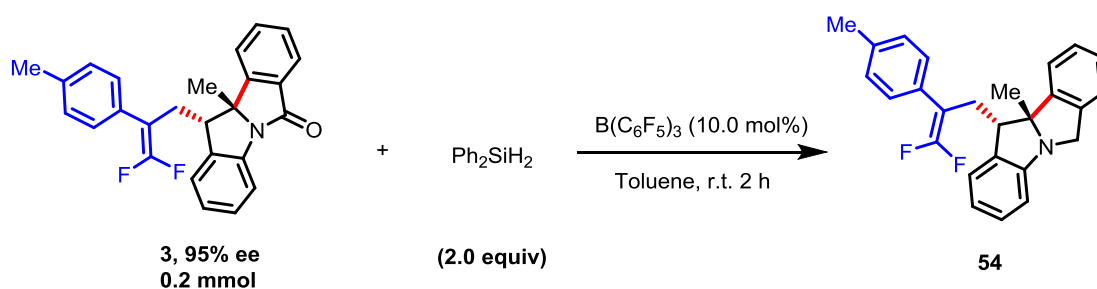

In the glove box, to a solution of **3** (0.2 mmol, 1.0 equiv, 80.3 mg), B(C<sub>6</sub>F<sub>5</sub>)<sub>3</sub> (0.02 mmol, 10.0 mol%, 10.2 mg) in toluene (1.0 mL) was added Ph<sub>2</sub>SiH<sub>2</sub> (0.4 mmol, 2.0 equiv, 73.7 mg) and toluene (1.0 mL). Then the reaction was stirred at room temperature for 2 h. After completion of the reaction, the reaction mixture was concentrated under vacuum. The crude product was purified by column chromatography on silica gel, eluting with petroleum ether/ethyl acetate = 20:1 (v/v) to afford the product **54** (65.8 mg, 0.177 mmol, 85% yield, 94% ee). [α]<sup>25</sup><sub>D</sub> = 36.0° (c = 0.50 in CHCl<sub>3</sub>).

**<sup>1</sup>H NMR (500 MHz, CDCl<sub>3</sub>):** δ 7.33 – 7.26 (m, 5H), 7.24 – 7.22 (m, 3H), 7.18 (t, *J* = 7.5 Hz, 1H), 7.08 (d, *J* = 7.5 Hz, 1H), 6.86 – 6.82 (m, 2H), 4.78 (d, *J* = 14.0 Hz, 1H), 4.42 (d, *J* = 14.0 Hz, 1H), 2.97 (dd, *J* = 11.5, 4.5 Hz, 1H), 2.56 – 2.50 (m, 1H), 2.38 (s, 3H), 1.91 – 1.85 (m, 1H), 1.45 (s, 3H) ppm.

**<sup>13</sup>C NMR (126 MHz, CDCl<sub>3</sub>):** δ 153.8 (dd, *J* = 290.7, 287.8 Hz), 152.1, 143.1, 140.2, 137.4, 134.8, 130.1 (t, *J* = 3.5 Hz), 129.6, 128.3, 128.2 (t, *J* = 3.3 Hz), 127.8, 127.2, 125.0, 123.9, 123.1, 120.8, 113.6, 89.9 (dd, *J* = 21.0, 13.6 Hz), 80.0, 58.1, 49.2, 32.9, 30.0, 21.3 ppm.

**<sup>19</sup>F NMR (471 MHz, CDCl<sub>3</sub>):** δ -90.2 (d, *J* = 41.0 Hz), -90.7 (dd, *J* = 40.5, 4.7 Hz) ppm.

**HRMS (ESI<sup>+</sup>):** *m/z*: [M+H]<sup>+</sup> calcd for C<sub>26</sub>H<sub>24</sub>F<sub>2</sub>N<sup>+</sup> 388.1871, found 388.1891.

The enantiomeric excess was determined by HPLC: e.r. = 97.2:2.8 (Chiralpak AD-H, *i*-propanol/hexane = 1/99, flow rate 1.0 mL/min, λ = 254 nm); *t*<sub>major</sub> = 3.730 min, *t*<sub>minor</sub> = 4.345 min.



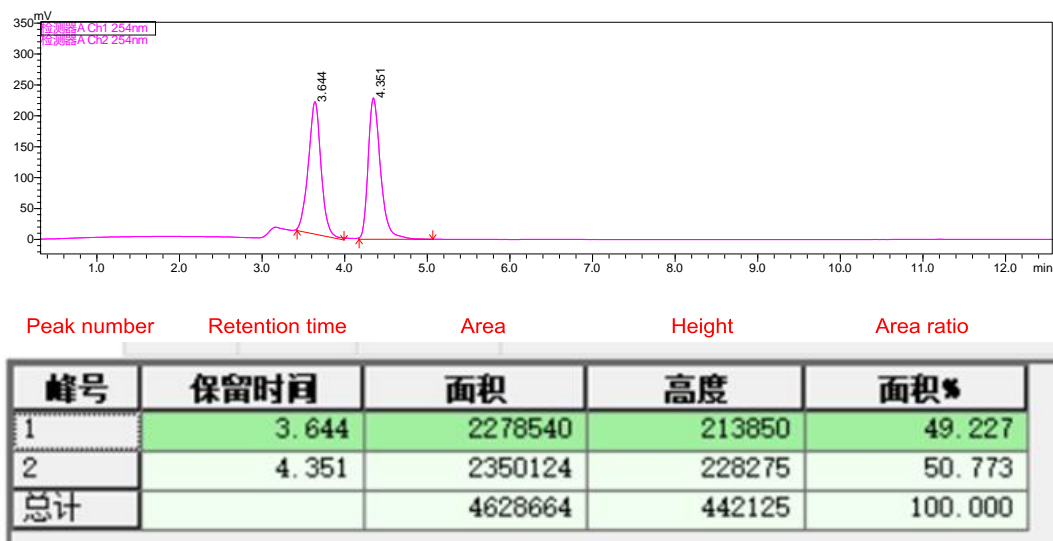

Figure S101. HPLC chromatography of the racemic product **54**

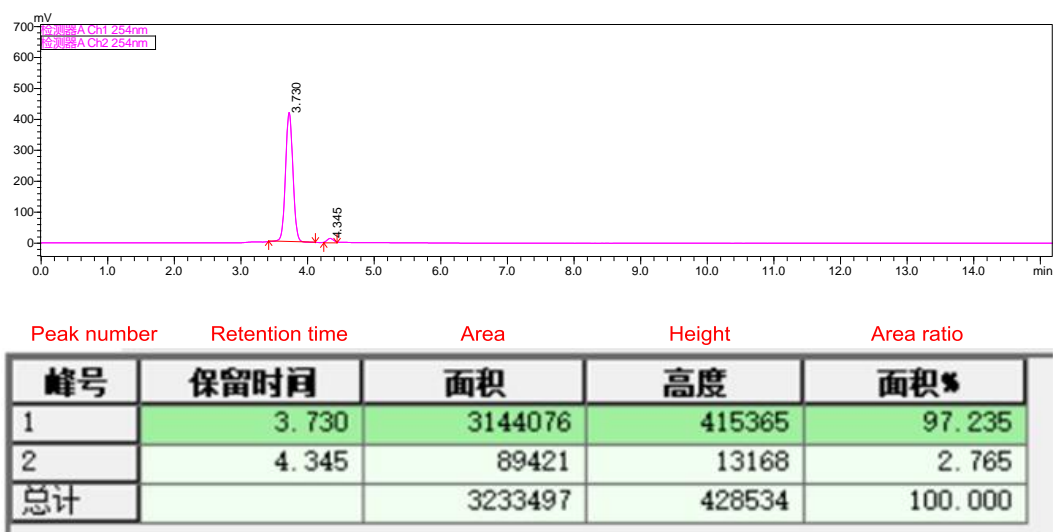

Figure S102. HPLC chromatography of chiral product **54**

## 6. Mechanistic Studies

### 6.1 Radical Capture Experiments

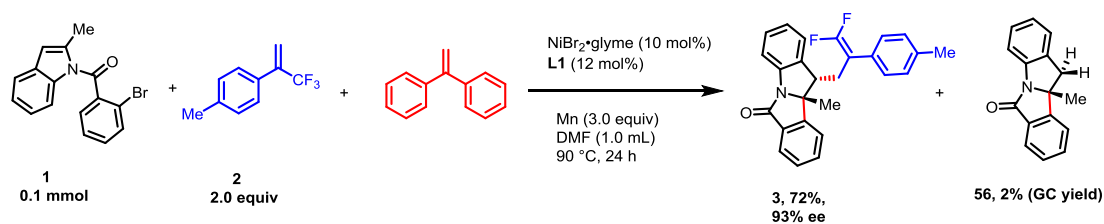

An oven-dried Schlenk tube (20 mL) was charged with NiBr<sub>2</sub>•glyme (0.01 mmol, 3.1 mg, 10.0 mol%), **L1** (0.012 mmol, 4.0 mg, 12.0 mol%), Mn dust (0.3 mmol, 16.5 mg, 3.0 equiv), **1** (0.1 mmol, 1.0 equiv, 31.4 mg), **2** (0.2 mmol, 2.0 equiv, 37.2 mg), 1,1-diphenylethylene (0.1 mmol, 1.0 equiv, 18.1 mg) and DMF (1.0 mL). The reaction mixture was allowed to stir under N<sub>2</sub> atmosphere at 90 °C (oil bath) for 24 h. After this time, the tube was cooled to room temperature then the reaction mixture was vacuumed to remove the volatiles. The residue was diluted with DCM (~10 mL) and filtered through a triangular suction filter funnel with a thin layer of celite, and the filtrate was concentrated under vacuum. The crude mixture was then purified by column chromatography on silica gel (Petroleum ether/Ethyl acetate = 7:1, v/v) to afford the desired product **3** as a yellow solid (28.9 mg, 0.072 mmol, 72% yield, 93% ee). The yield of **56** was confirmed by GC using 1,3,5-trimethoxybenzene as an internal standard.

The enantiomeric excess was determined by HPLC: e.r. = 96.3:3.7 (Chiralpak AD-H, *i*-propanol/hexane = 5/95, flow rate 1.0 mL/min, λ = 254 nm); t<sub>major</sub> = 16.613 min, t<sub>minor</sub> = 9.620 min.

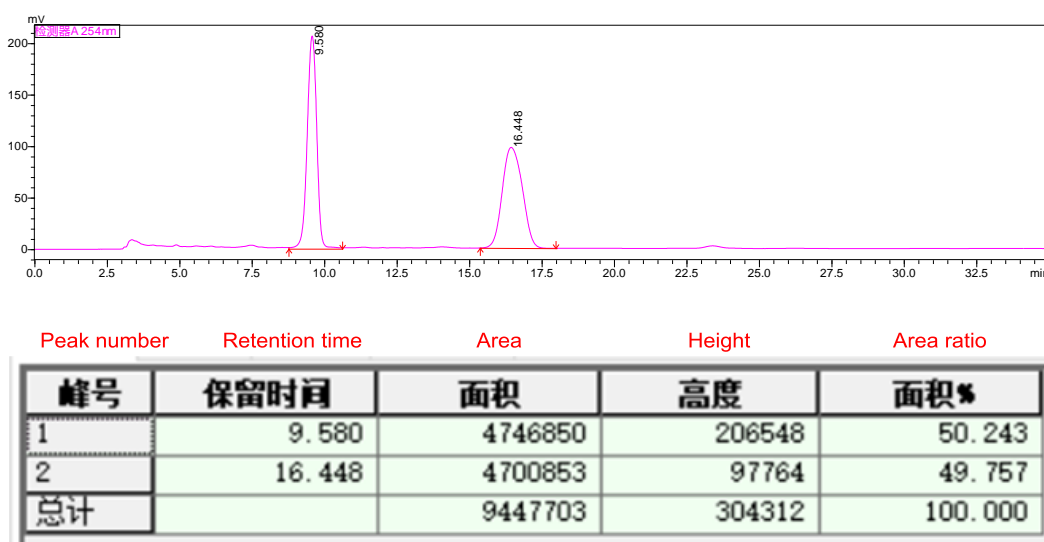

Figure S103. HPLC chromatography of the racemic product **3**

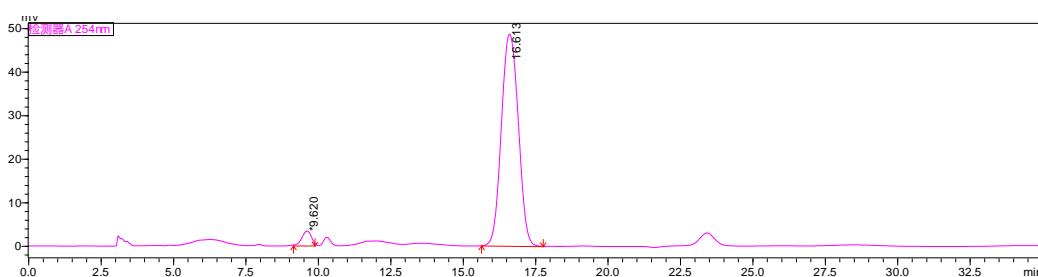

| Peak number | Retention time | Area    | Height | Area ratio |
|-------------|----------------|---------|--------|------------|
| 峰号          | 保留时间           | 面积      | 高度     | 面积%        |
| 1           | 9.620          | 75839   | 3341   | 3.695      |
| 2           | 16.613         | 1976646 | 48617  | 96.305     |
| 总计          |                | 2052486 | 51958  | 100.000    |

**Figure S104.** HPLC chromatography of chiral product **3**

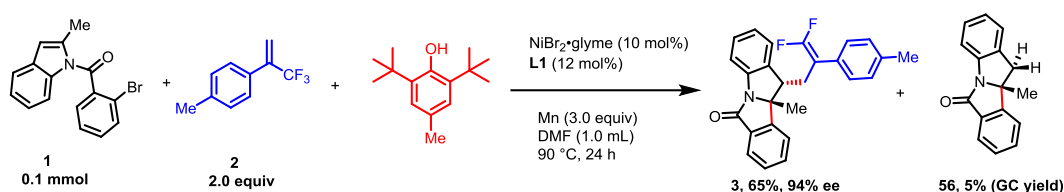

An oven-dried Schlenk tube (20 mL) was charged with NiBr<sub>2</sub>·glyme (0.01 mmol, 3.1 mg, 10.0 mol%), **L1** (0.012 mmol, 4.0 mg, 12.0 mol%), Mn dust (0.3 mmol, 16.5 mg, 3.0 equiv), **1** (0.1 mmol, 1.0 equiv, 31.4 mg), **2** (0.2 mmol, 2.0 equiv, 37.2 mg), BHT (0.1 mmol, 1.0 equiv, 22.0 mg) and DMF (1.0 mL). The reaction mixture was allowed to stir under N<sub>2</sub> atmosphere at 90 °C (oil bath) for 24 h. After this time, the tube was cooled to room temperature then the reaction mixture was vacuumed to remove the volatiles. The residue was diluted with DCM (~10 mL) and filtered through a triangular suction filter funnel with a thin layer of celite, and the filtrate was concentrated under vacuum. The crude mixture was then purified by column chromatography on silica gel (Petroleum ether/Ethyl acetate = 7:1, v/v) to afford the desired product **3** as a yellow solid (26.1 mg, 0.065 mmol, 65% yield). The yield of **56** was confirmed by GC using 1,3,5-trimethoxybenzene as an internal standard.

The enantiomeric excess was determined by HPLC: e.r. = 96.8:3.2 (Chiralpak AD-H, *i*-propanol/hexane = 5/95, flow rate 1.0 mL/min, λ = 254 nm); t<sub>major</sub> = 16.692 min, t<sub>minor</sub> = 9.639 min.

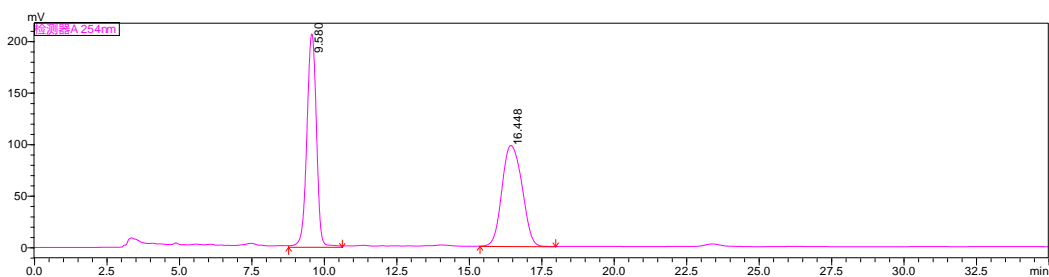

| Peak number | Retention time | Area    | Height | Area ratio |
|-------------|----------------|---------|--------|------------|
| 峰号          | 保留时间           | 面积      | 高度     | 面积%        |
| 1           | 9.580          | 4746850 | 206548 | 50.243     |
| 2           | 16.448         | 4700853 | 97764  | 49.757     |
| 总计          |                | 9447703 | 304312 | 100.000    |

Figure S105. HPLC chromatography of the racemic product **3**

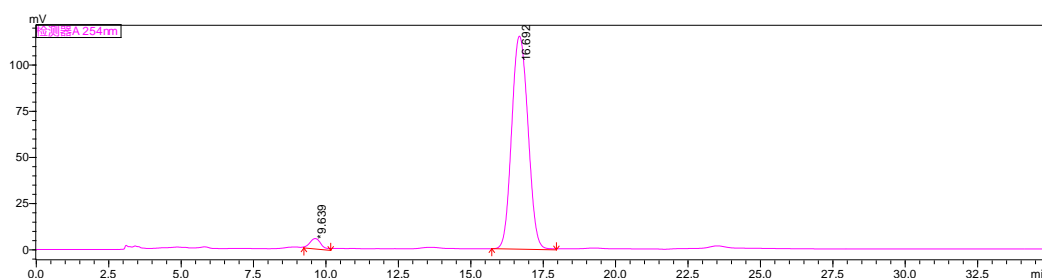

| Peak number | Retention time | Area    | Height | Area ratio |
|-------------|----------------|---------|--------|------------|
| 峰号          | 保留时间           | 面积      | 高度     | 面积%        |
| 1           | 9.639          | 146915  | 5476   | 3.166      |
| 2           | 16.692         | 4494195 | 115094 | 96.834     |
| 总计          |                | 4641110 | 120570 | 100.000    |

Figure S106. HPLC chromatography of chiral product **3**

## 6.2 Deuterium-Labeling Experiments

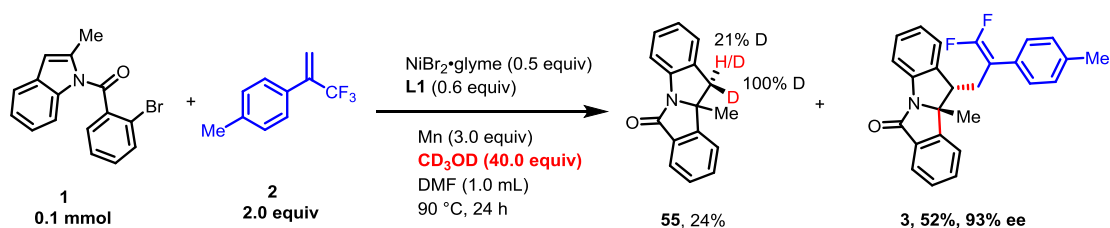

An oven-dried Schlenk tube (20.0 mL) was charged with NiBr<sub>2</sub>·glyme (0.05 mmol, 15.4 mg, 50.0 mol%), L1 (0.06 mmol, 19.9 mg, 60.0 mol%), Mn dust (0.3 mmol, 16.5 mg, 3.0 equiv), **1** (0.1 mmol, 1.0 equiv, 31.4 mg), **2** (0.2 mmol, 2.0 equiv, 37.2 mg), CD<sub>3</sub>OD (4.0 mmol, 40.0 equiv, 144.3 mg) and DMF (1.0 mL). The reaction mixture was allowed to stir under N<sub>2</sub> atmosphere at 90 °C (oil bath) for 24 h. After this time, the tube was cooled to room temperature then the reaction mixture was vacuumed to remove the volatiles. The residue was diluted with DCM (~10 mL) and filtered through a triangular suction filter funnel with a thin layer of celite, and the filtrate was concentrated under vacuum. The crude mixture was then purified by column

chromatography on silica gel (Petroleum ether/Ethyl acetate = 7:1, v/v) to afford the desired product **3** as a white solid (20.9 mg, 0.052 mmol, 52% yield).

The enantiomeric excess was determined by HPLC: e.r. = 96.5:3.5 (Chiralpak AD-H, *i*-propanol/hexane = 5/95, flow rate 1.0 mL/min,  $\lambda$  = 254 nm);  $t_{\text{major}}$  = 15.455 min,  $t_{\text{minor}}$  = 9.308 min.

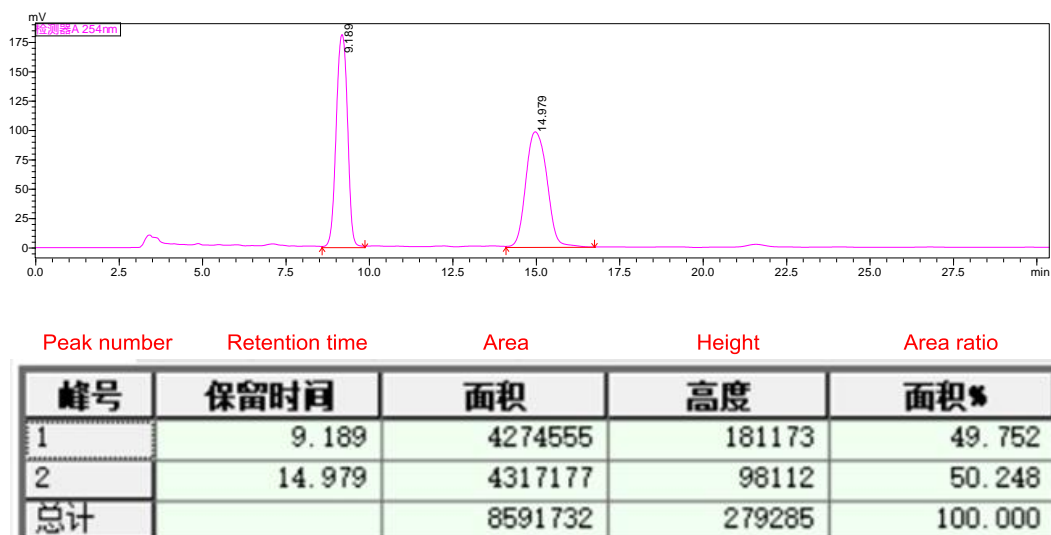

Figure S107. HPLC chromatography of the racemic product **3**

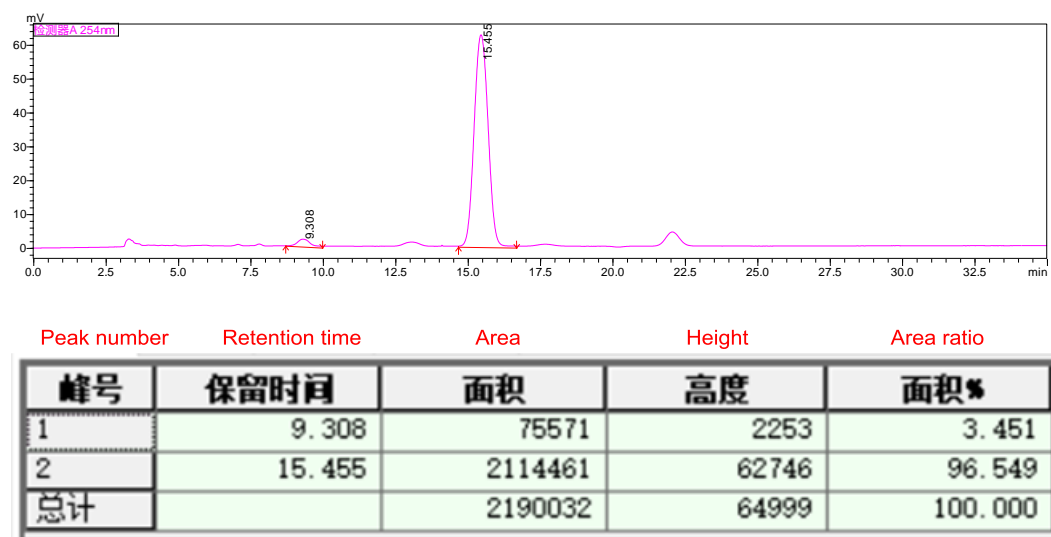

Figure S108. HPLC chromatography of chiral product **3**

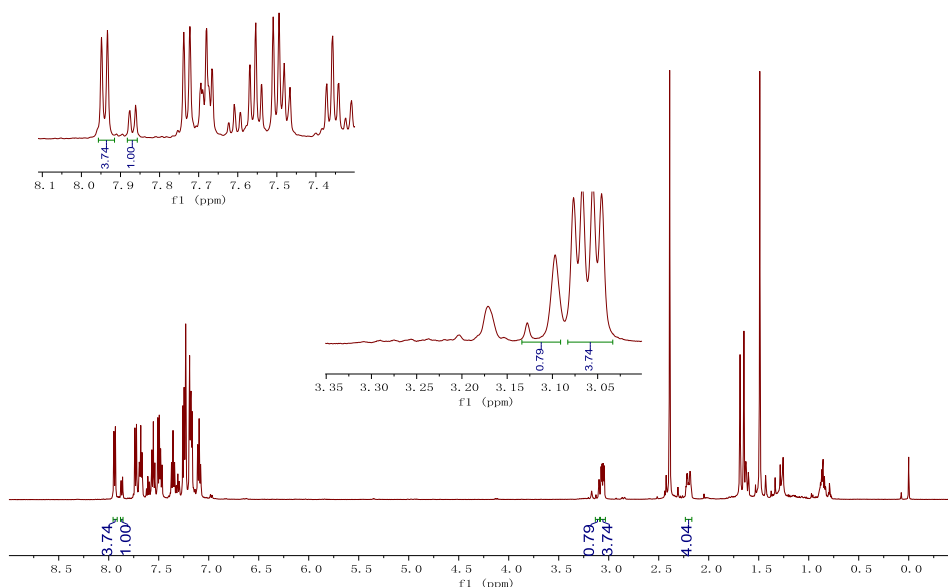

**Figure S109.**  $^1\text{H}$  NMR spectra (500 MHz,  $\text{CDCl}_3$ ) of the mixture of products **3** and **56**

### 6.3 The Profile of Reductant in Nickel-Catalyzed Dearomative Reductive Coupling

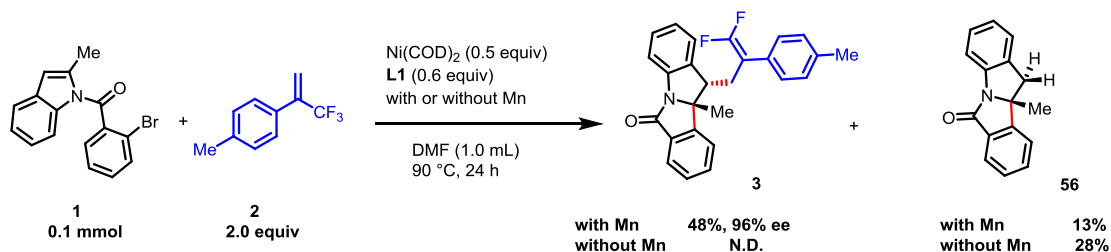

An oven-dried Schlenk tube (20.0 mL) was charged with  $\text{Ni}(\text{COD})_2$  (0.05 mmol, 13.8 mg, 0.5 equiv), **L1** (0.06 mmol, 20.0 mg, 0.3 equiv), Mn dust (0.3 mmol, 16.50mg, 3.0 equiv or without), **1** (0.1 mmol, 1.0 equiv, 31.4 mg), **2** (0.2 mmol, 2.0 equiv, 37.4 mg), and DMF (1.0 mL). The reaction mixture was allowed to stir under  $\text{N}_2$  atmosphere at  $90^\circ\text{C}$  (oil bath) for 24 h. After this time, the tube was cooled to room temperature then the reaction mixture was vacuumed to remove the volatiles. The residue was diluted with DCM (~10 mL) and filtered through a triangular suction filter funnel with a thin layer of celite, and the filtrate was concentrated under vacuum. The crude mixture was then purified by column chromatography on silica gel (Petroleum ether/Ethyl acetate = 7:1, v/v) to afford the desired product **3** as a yellow solid (19.3 mg, 0.048 mmol, 48% yield, 96% ee). The yield of **56** was confirmed by GC using 1,3,5-trimethoxybenzene as an internal standard.

The enantiomeric excess was determined by HPLC: e.r. = 98.2:1.8 (Chiralpak AD-H, *i*-propanol/hexane = 5/95, flow rate 1.0 mL/min,  $\lambda$  = 254 nm);  $t_{\text{major}}$  = 16.628 min,  $t_{\text{minor}}$  = 9.422 min.

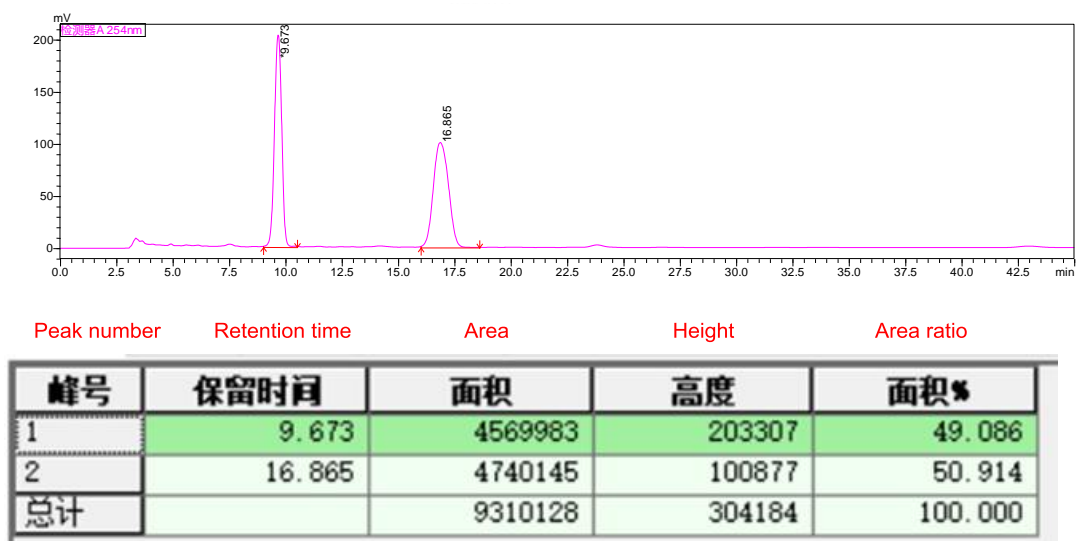

Figure S110. HPLC chromatography of the racemic product 3

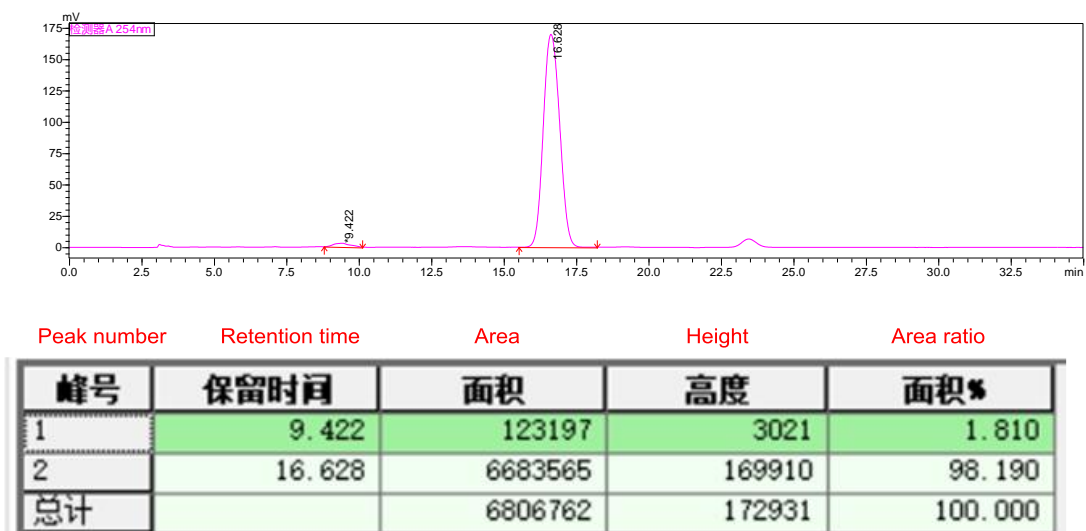

Figure S111. HPLC chromatography of chiral product 3

## 6.4 Kinetic Studies

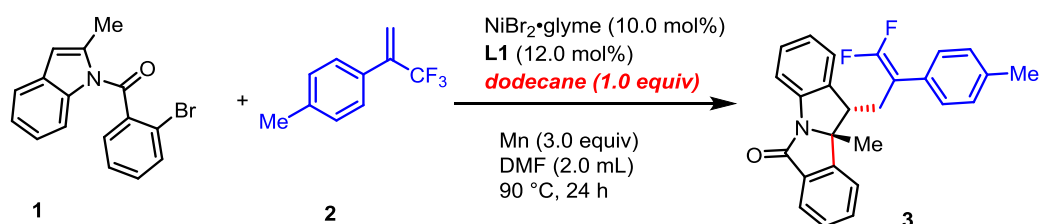

An oven-dried Schlenk tube (20.0 mL) was charged with NiBr<sub>2</sub>•glyme (0.02 mmol, 6.2 mg, 10.0 mol%), L1 (0.024 mmol, 8.0 mg, 12.0 mol%), Mn dust (0.6 mmol, 33.0 mg, 3.0 equiv), **1** (0.2 mmol, 1.0 equiv), **2** (0.4 mmol, 2.0 equiv), dodecane (0.2 mmol, 1.0 equiv, 34.1 mg) and DMF (2.0 mL). The reaction mixture was allowed to stir under N<sub>2</sub> atmosphere at 90 °C (oil bath). At 1, 2, 3, 4, 5, 7, 9, 11, 13, 16, 19, 22 and 24 h, a 25 μL aliquot of the reaction mixture was removed with microsampler under N<sub>2</sub> atmosphere and transferred into another vial. The measured mixture was diluted with ethyl acetate (2 mL) and filtered through a 0.22-μm filter membranes and the resulting filtrate was collected in a GC vial. The sample was analyzed by GC and the yields were determined based on the peak area of the analyte compared to dodecane as an internal standard. Enantiomeric excess was determined by HPLC analysis with a chiral column (Chiralpak AD-H, *i*-propanol/hexane = 5/95, flow rate 1.0 mL/min, λ = 254 nm).

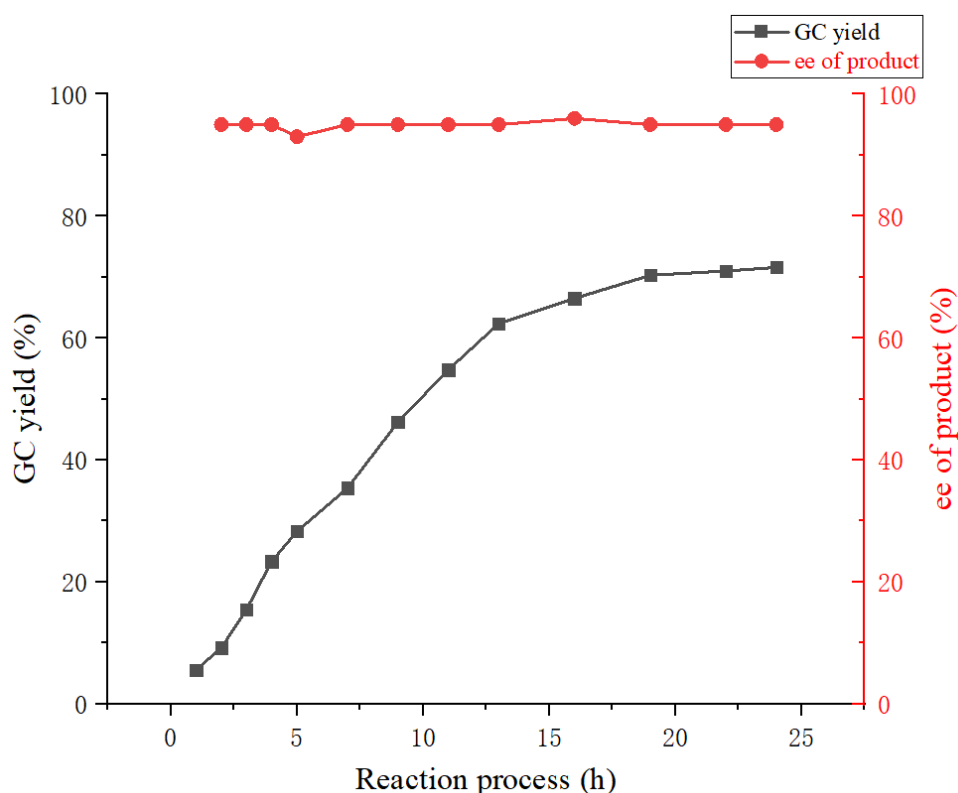

**Figure S112** Kinetic profiles of reactions with yield and ee values of product **3**

### 6.5 Hammett Plot of Different Substituents on Trifluoromethyl Alkenes

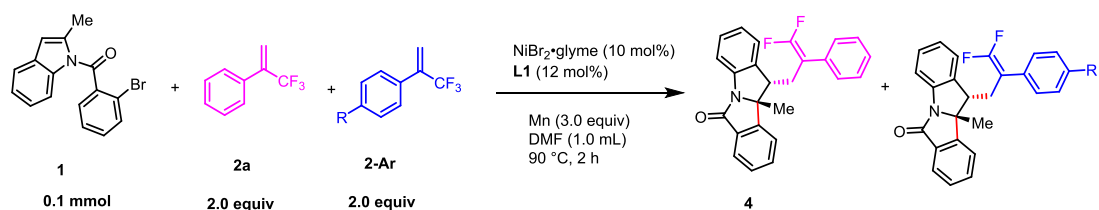



An oven-dried Schlenk tube (20.0 mL) was charged with NiBr<sub>2</sub>•glyme (0.01 mmol, 3.1 mg, 10.0 mol%), L1 (0.012 mmol, 4.0 mg, 12.0 mol%), Mn dust (0.3 mmol, 16.5 mg, 3.0 equiv), **1** (0.1 mmol, 1.0 equiv), **2a** (0.2 mmol, 2.0 equiv), trifluoromethyl alkenes (0.2 mmol, 2.0 equiv) and DMF (1.0 mL). The reaction mixture was allowed to stir under N<sub>2</sub> atmosphere at 90 °C (oil bath) for 2 h. After this time, the tube was cooled to room temperature. The yields of products were confirmed by GC using dodecane as an internal standard.

**Table S1** Hammett plot varying the electronics on alkenes

| <b>R</b>    | <b>Hammett <math>\sigma_p</math></b> | <b>[2-Ar]/[4]</b> | <b>log(k/k<sub>0</sub>)</b> |
|-------------|--------------------------------------|-------------------|-----------------------------|
| OMe         | -0.27                                | 0.5248            | -0.2800                     |
| <i>t</i> Bu | -0.15                                | 0.5631            | -0.2494                     |
| H           | 0                                    | 1                 | 0                           |
| CHO         | 0.42                                 | 2.4434            | 0.3880                      |
| Ac          | 0.47                                 | 3.7905            | 0.5787                      |
| CN          | 0.70                                 | 3.8557            | 0.5861                      |

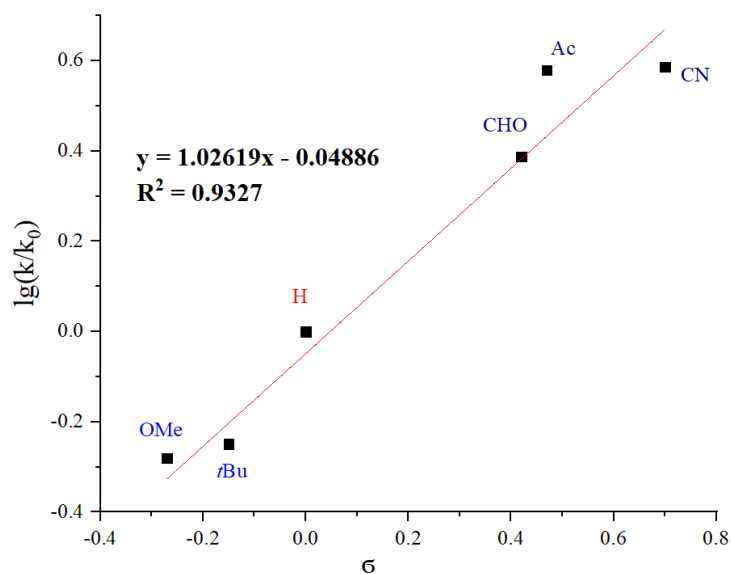

**Figure S113** Hammett plot varying the electronics on alkenes

## 7. X-ray Crystallographic Studies

### The Absolute Configuration Determination of Compounds **14** and **16** Produced by Asymmetric Dearomative Reductive Coupling

**Procedure for the sample preparation of 14:** In an oven-dried 10.0 mL vial, **14** (30

mg) was dissolved in ethyl acetate/hexane (10:1, v/v). After slow evaporation at room temperature, the crystal was afforded.

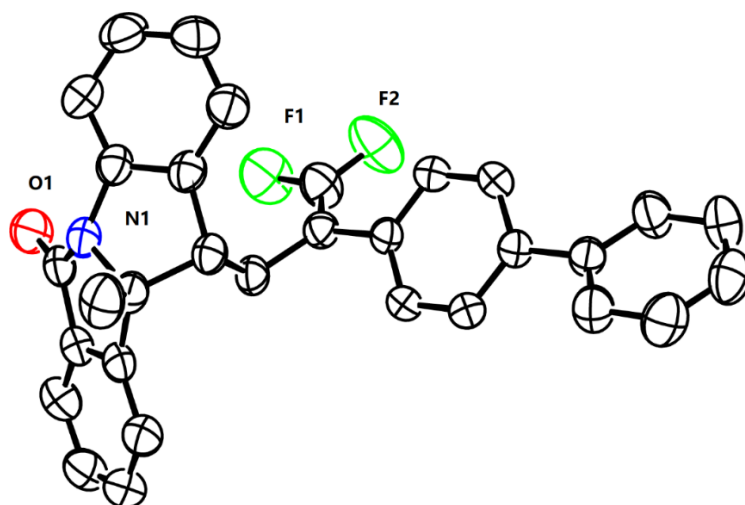

**Figure S114.** Crystal structure of compound **14** with 50% thermal ellipsoids (Solvent molecules, and carbon hydrogenatoms were omitted for clarity.) (CCDC 2268960)

#### Crystal data and structure refinement for **14**.

|                                    |                                                               |
|------------------------------------|---------------------------------------------------------------|
| Identification code                | exp_3118                                                      |
| Empirical formula                  | C <sub>31</sub> H <sub>23</sub> F <sub>2</sub> NO             |
| Formula weight                     | 463.50                                                        |
| Temperature/K                      | 293                                                           |
| Crystal system                     | tetragonal                                                    |
| Space group                        | P4 <sub>3</sub> 2 <sub>1</sub> 2                              |
| a/Å                                | 11.38010(10)                                                  |
| b/Å                                | 11.38010(10)                                                  |
| c/Å                                | 37.2074(6)                                                    |
| α/°                                | 90                                                            |
| β/°                                | 90                                                            |
| γ/°                                | 90                                                            |
| Volume/Å <sup>3</sup>              | 4818.61(11)                                                   |
| Z                                  | 8                                                             |
| ρ <sub>calc</sub> /cm <sup>3</sup> | 1.278                                                         |
| μ/mm <sup>-1</sup>                 | 0.710                                                         |
| F(000)                             | 1936.0                                                        |
| Crystal size/mm <sup>3</sup>       | 0.3 × 0.3 × 0.3                                               |
| Radiation                          | CuKα (λ = 1.54184)                                            |
| 2θ range for data collection/°     | 8.124 to 139.232                                              |
| Index ranges                       | -13 ≤ h ≤ 13, -13 ≤ k ≤ 13, -45 ≤ l ≤ 42                      |
| Reflections collected              | 55480                                                         |
| Independent reflections            | 4531 [R <sub>int</sub> = 0.0382, R <sub>sigma</sub> = 0.0156] |
| Data/restraints/parameters         | 4531/0/317                                                    |
| Goodness-of-fit on F <sup>2</sup>  | 1.071                                                         |

|                                                |                                  |
|------------------------------------------------|----------------------------------|
| Final R indexes [ $I \geq 2\sigma(I)$ ]        | $R_1 = 0.0346$ , $wR_2 = 0.0829$ |
| Final R indexes [all data]                     | $R_1 = 0.0366$ , $wR_2 = 0.0847$ |
| Largest diff. peak/hole / $e \text{ \AA}^{-3}$ | 0.09/-0.16                       |
| Flack parameter                                | 0.05(4)                          |

**Procedure for the sample preparation of 16:** In an oven-dried 10.0 mL vial, **16** (60 mg) was dissolved in ethyl acetate/hexane (1:1, v/v). After slow evaporation in a refrigerator ( $-5 \text{ }^\circ\text{C}$ ), the crystal was afforded.

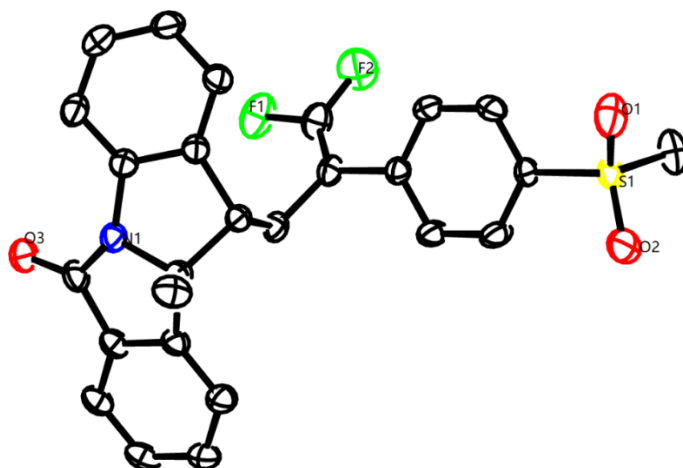

**Figure S115.** Crystal structure of compound **16** with 50% thermal ellipsoids (Solvent molecules, and carbon hydrogen atoms were omitted for clarity.) (CCDC 2256727)

#### Crystal data and structure refinement for 16.

|                                    |                                                           |
|------------------------------------|-----------------------------------------------------------|
| Identification code                | exp_2833                                                  |
| Empirical formula                  | $\text{C}_{26}\text{H}_{21}\text{F}_2\text{NO}_3\text{S}$ |
| Formula weight                     | 465.50                                                    |
| Temperature/K                      | 293(10)                                                   |
| Crystal system                     | orthorhombic                                              |
| Space group                        | $P2_12_12_1$                                              |
| $a/\text{\AA}$                     | 8.3223(4)                                                 |
| $b/\text{\AA}$                     | 14.4055(8)                                                |
| $c/\text{\AA}$                     | 18.9688(14)                                               |
| $\alpha/^\circ$                    | 90                                                        |
| $\beta/^\circ$                     | 90                                                        |
| $\gamma/^\circ$                    | 90                                                        |
| Volume/ $\text{\AA}^3$             | 2274.1(2)                                                 |
| Z                                  | 4                                                         |
| $\rho_{\text{calc}}/\text{g/cm}^3$ | 1.360                                                     |
| $\mu/\text{mm}^{-1}$               | 1.654                                                     |
| F(000)                             | 968.0                                                     |
| Crystal size/ $\text{mm}^3$        | $0.2 \times 0.1 \times 0.05$                              |
| Radiation                          | $\text{CuK}\alpha$ ( $\lambda = 1.54184$ )                |

|                                                  |                                                                  |
|--------------------------------------------------|------------------------------------------------------------------|
| 2 $\Theta$ range for data collection/ $^{\circ}$ | 7.706 to 133.184                                                 |
| Index ranges                                     | $-9 \leq h \leq 9$ , $-17 \leq k \leq 17$ , $-22 \leq l \leq 22$ |
| Reflections collected                            | 29182                                                            |
| Independent reflections                          | 4020 [ $R_{\text{int}} = 0.0618$ , $R_{\text{sigma}} = 0.0405$ ] |
| Data/restraints/parameters                       | 4020/0/300                                                       |
| Goodness-of-fit on $F^2$                         | 0.944                                                            |
| Final R indexes [ $I \geq 2\sigma(I)$ ]          | $R_1 = 0.0350$ , $wR_2 = 0.0754$                                 |
| Final R indexes [all data]                       | $R_1 = 0.0449$ , $wR_2 = 0.0786$                                 |
| Largest diff. peak/hole / $e \text{ \AA}^{-3}$   | 0.11/-0.19                                                       |
| Flack parameter                                  | 0.008(12)                                                        |

## 8. References

1. Petrone, D. A.; Yen, A.; Zeidan, N.; Lautens, M. *Org. Lett.* **2015**, *17*, 4838-4841.
2. Suzuki, N.; Yasaki, S.; Yasuhara, A.; Sakamoto, T. *Chem. Pharm. Bull.* **2003**, *51*, 1170-1173.
3. Zhang, Xu; Huang, X. M.; Chen, Y. Z.; Chen, B.; Ma, Y. H. *Org. Lett.* **2023**, *25*, 1748-1753.
4. Lin, Z. Y.; Lan, Y.; Wang, C. *ACS Catal.* **2019**, *9*, 775-780.
5. Ping, Y. Y.; Li, X.; Pan, Q.; Kong, W. Q. *Angew. Chem. Int. Ed.* **2022**, *61*, e202201574.
6. Wang, J.-X. Ge, W.; Fu, M.-C.; Fu, Y. *Org. Lett.* **2022**, *24*, 1471-1475.
7. Phelan, J. P.; Lang, S. B.; Compton, J. S.; Kelly, C. B.; Dykstra, R.; Gutierrez, O.; Molander, G. A. *J. Am. Chem. Soc.* **2018**, *140*, 8037-8047.
8. Xing, W.-L.; Wang, J.-X.; Fu, M.-C.; Fu, Y. *Chin. J. Chem.* **2022**, *40*, 323-328.
9. Ma, T.; Chen, Y. T.; Li, Y. X.; Ping, Y. Y.; Kong, W. *ACS Catal.* **2019**, *9*, 9127-9133.
10. Ma, Y.-C.; Zhang, Y.; Gu, C.-Z.; Du, G.-F.; He, L. *New J. Chem.* **2019**, *43*, 10985-10988.

## 9. NMR Spectra

### (10*R*,11*S*)-11-(3,3-Difluoro-2-(*p*-tolyl)allyl)-10*b*-methyl-10*b*,11-dihydro-6*H*-isoindolo[2,1-*a*]indol-6-one, 3

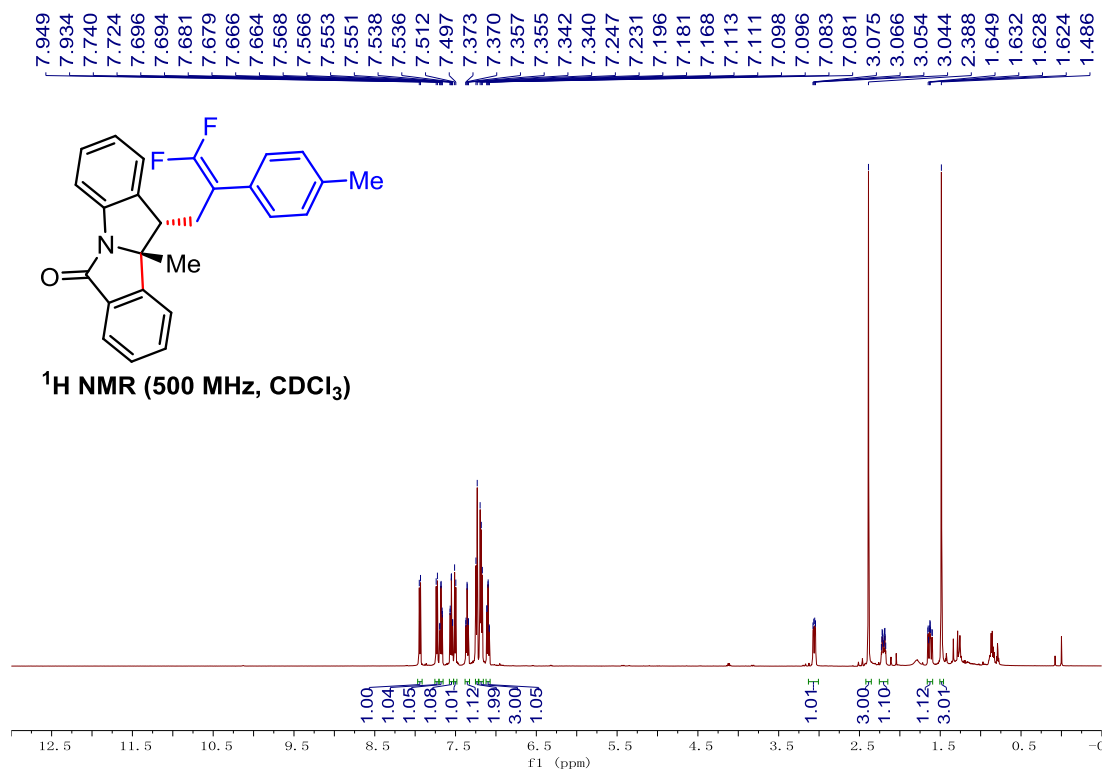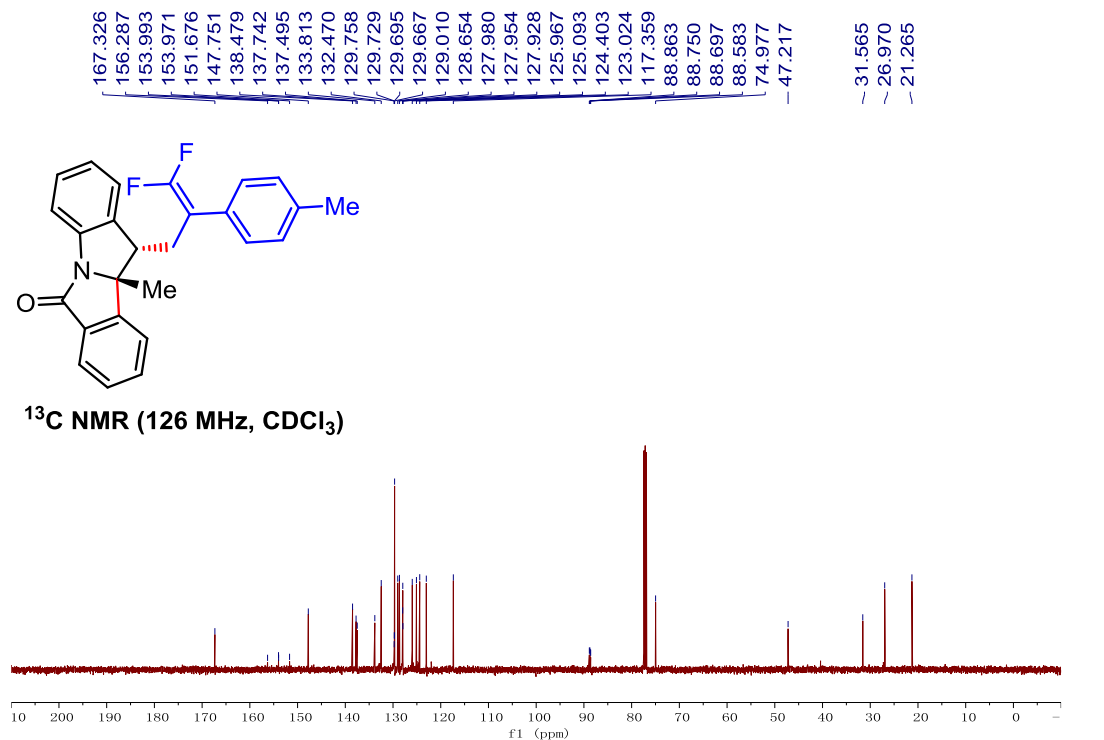

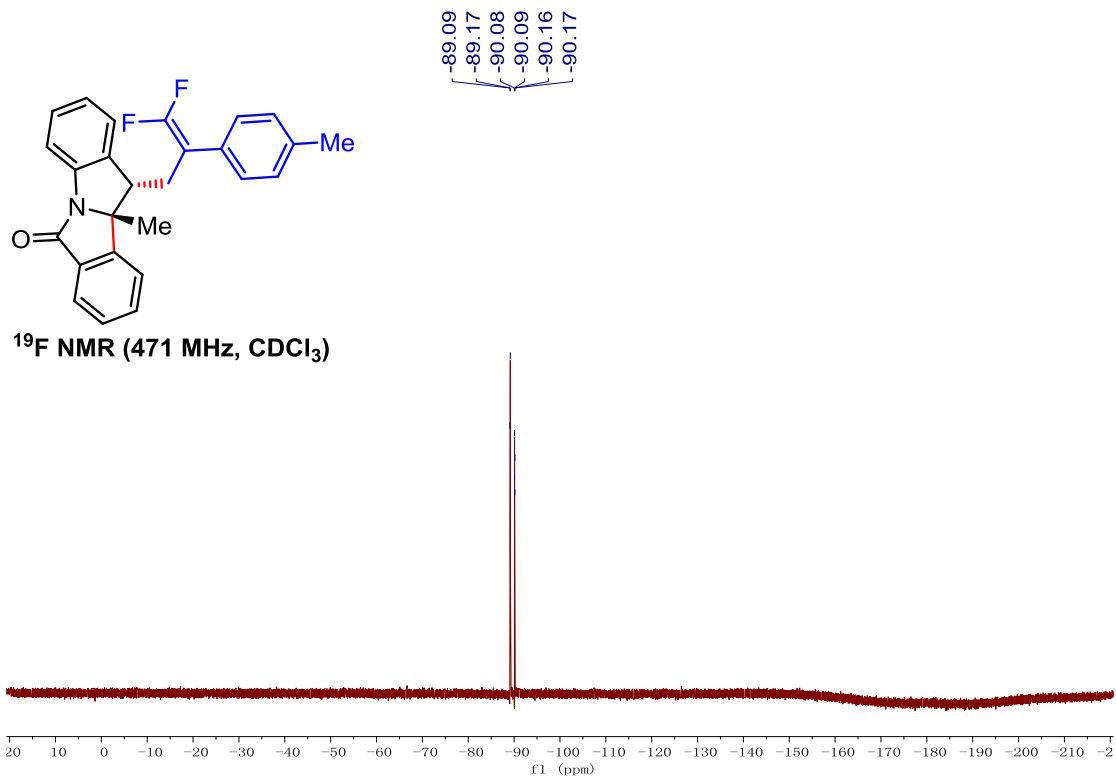

(10*R*,11*S*)-11-(3,3-Difluoro-2-phenylallyl)-10*b*-methyl-10*b*,11-dihydro-6*H*-isoindolo[2,1-*a*]indol-6-one, 4

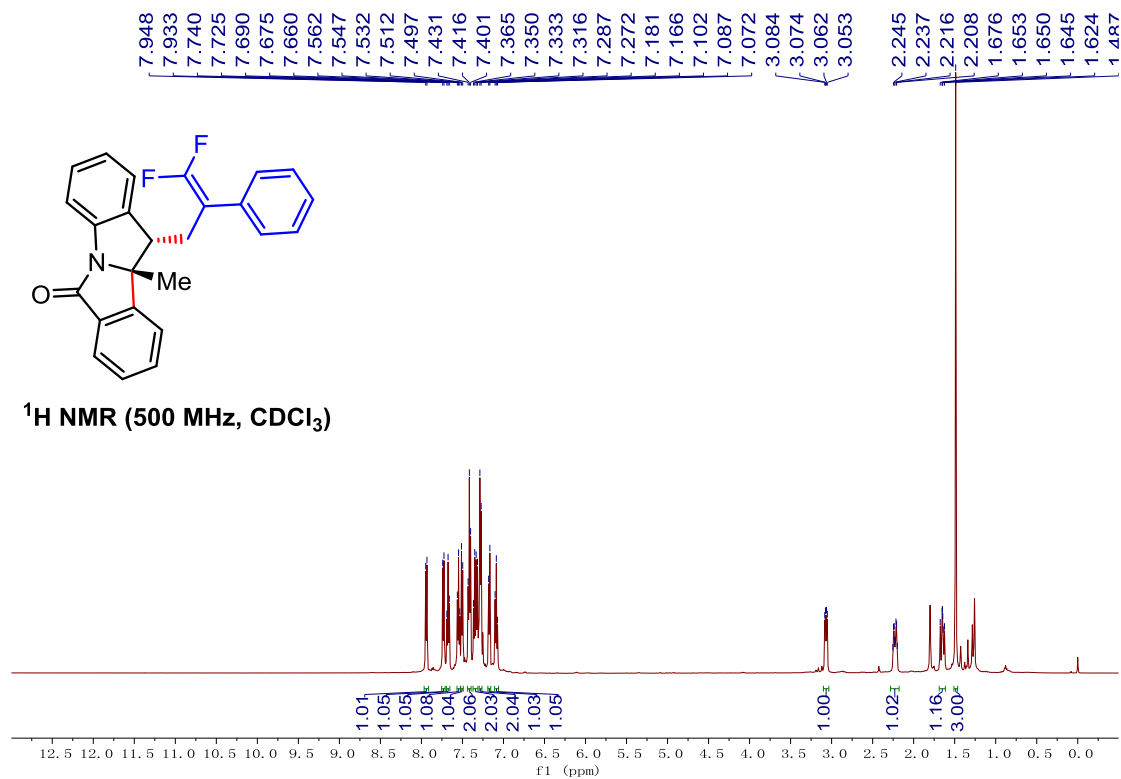

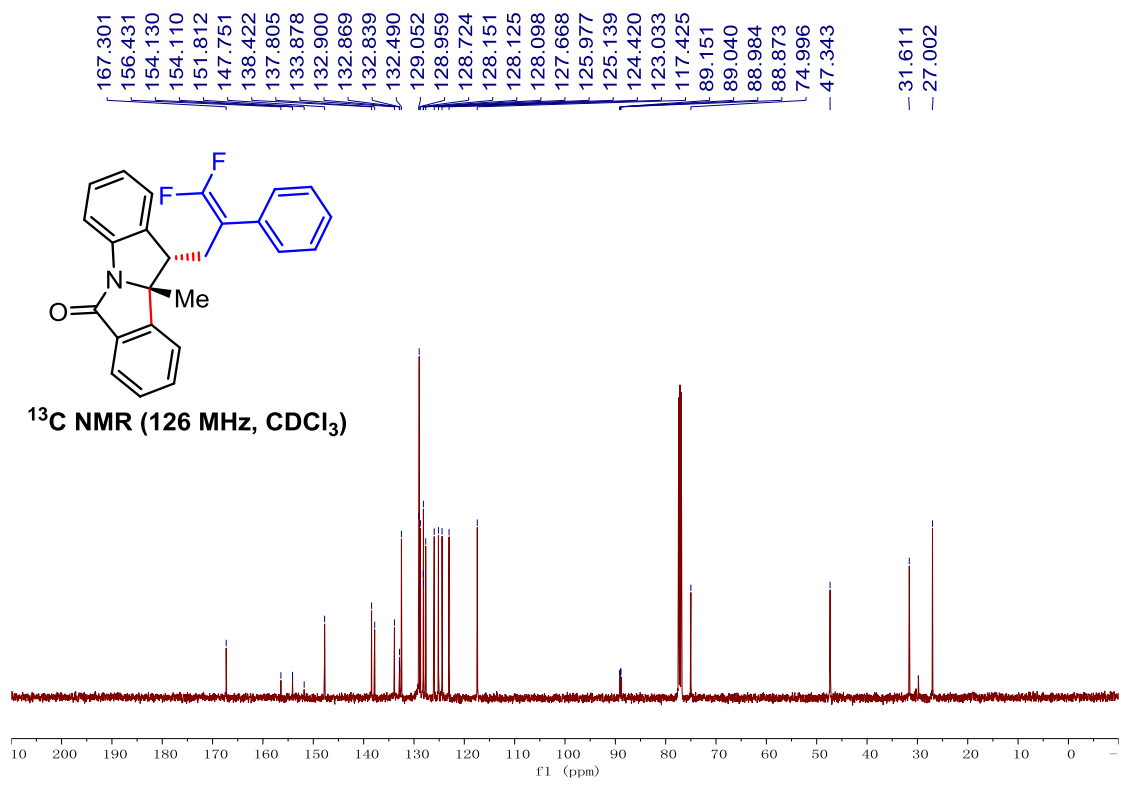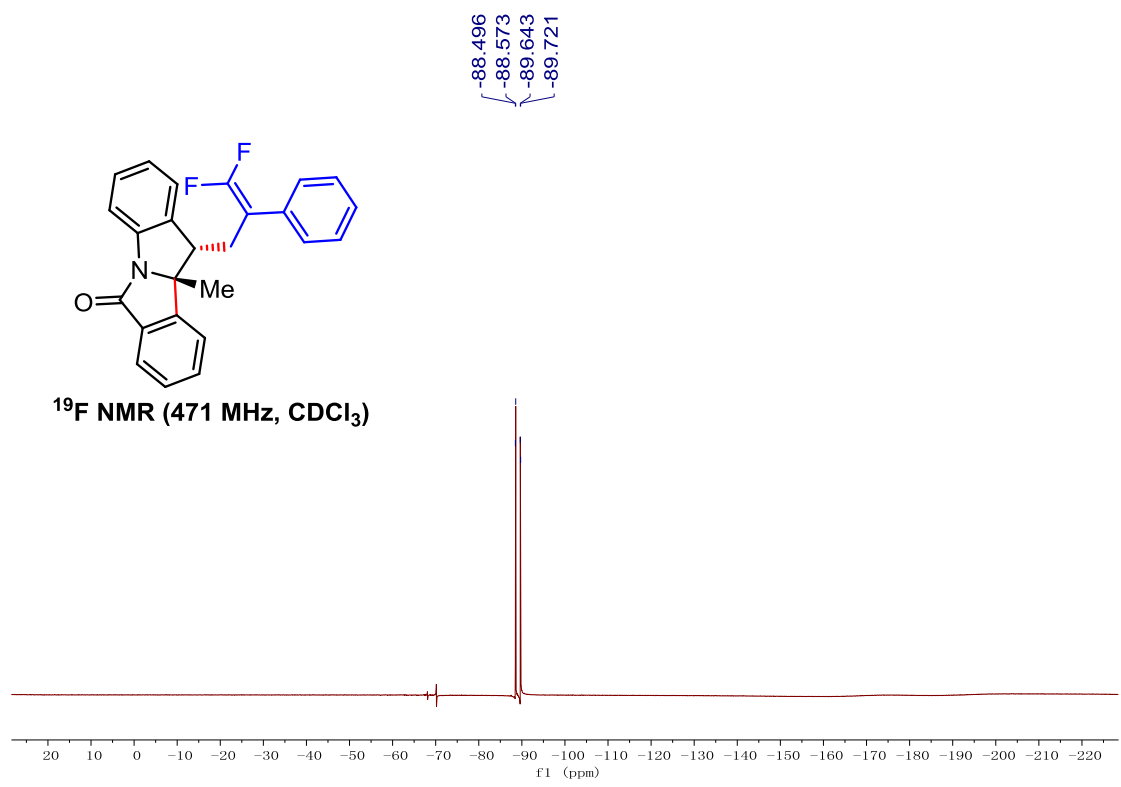



**(10*R*,11*S*)-11-(3,3-Difluoro-2-(4-methoxyphenyl)allyl)-10*b*-methyl-10*b*,11-dihydro-6*H*-isoindolo[2,1-*a*]indol-6-one, 5**

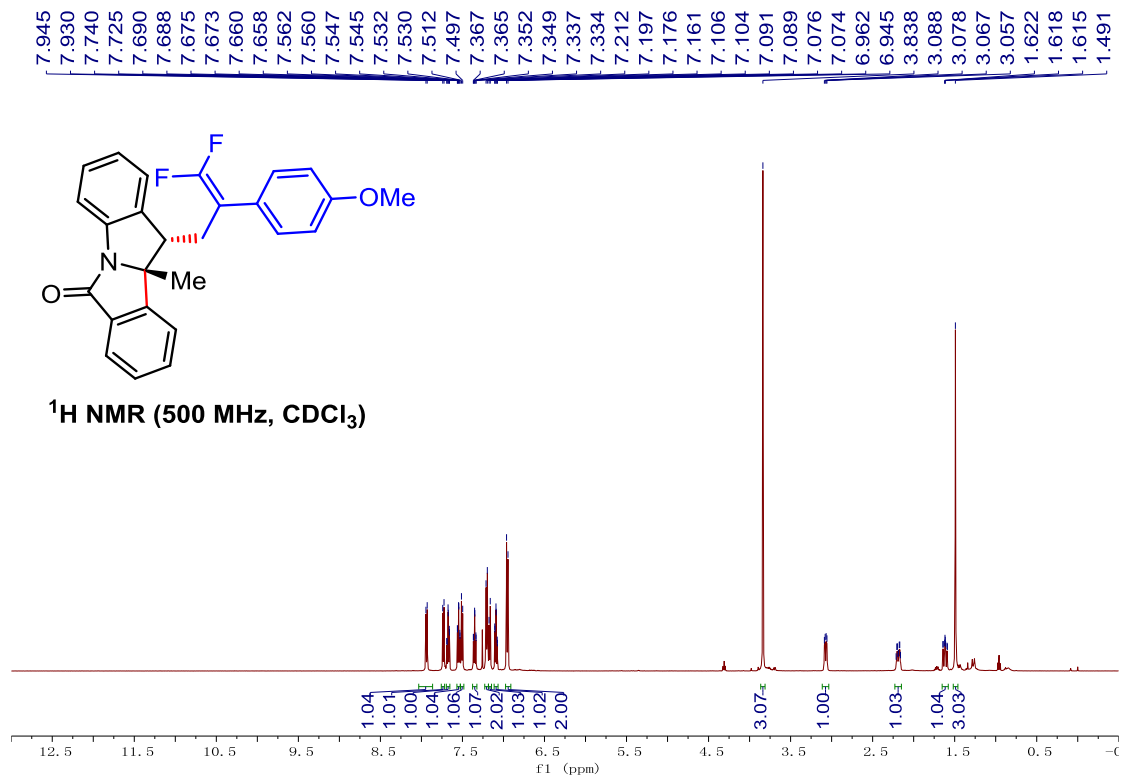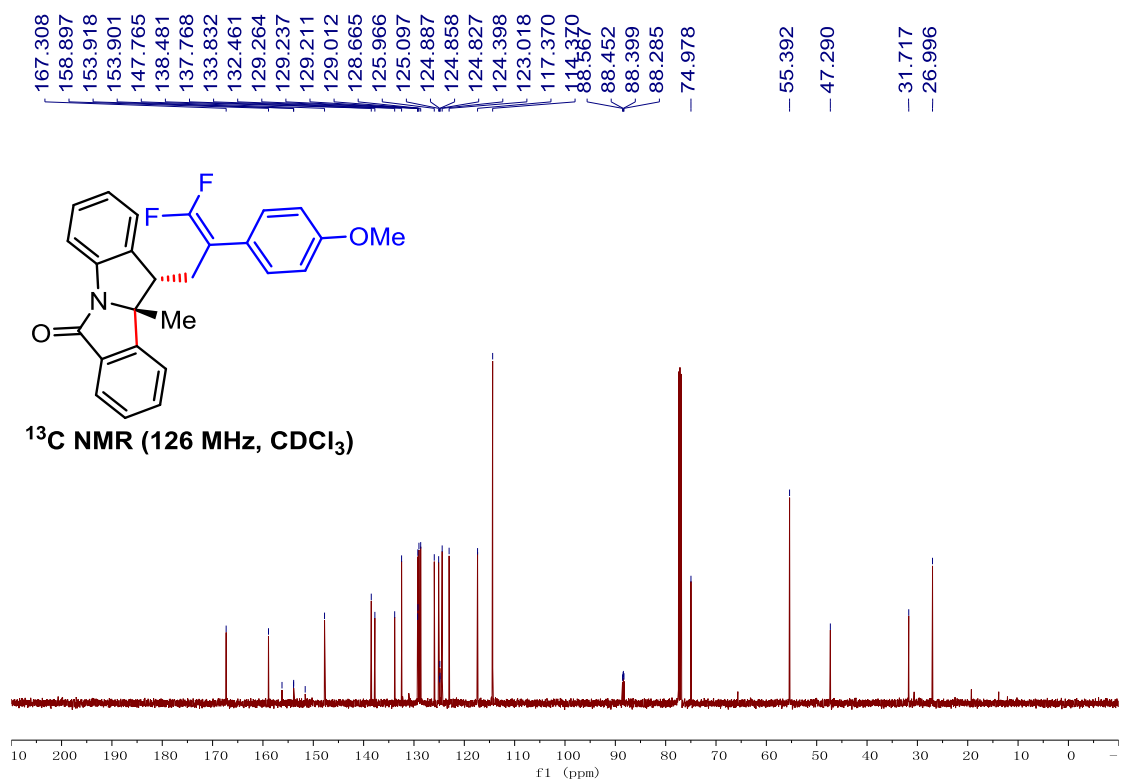

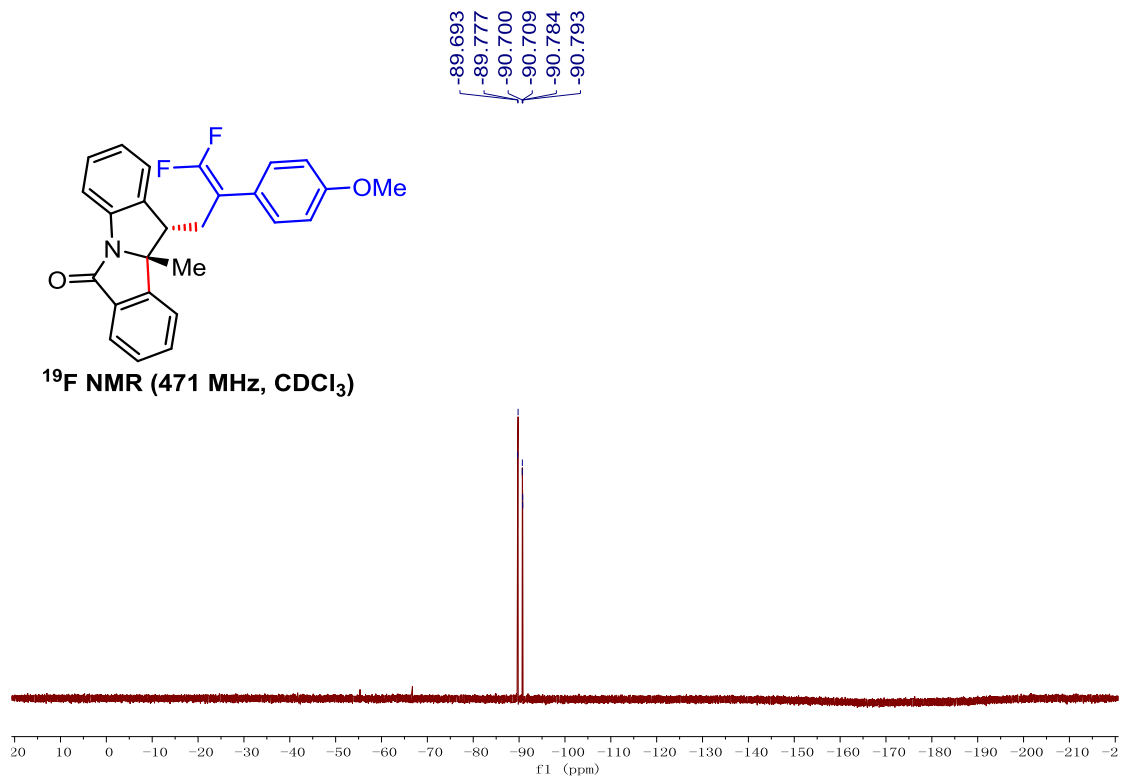

**(10bR,11S)-11-(2-(4-(*tert*-Butyl)phenyl)-3,3-difluoroallyl)-10b-methyl-10b,11-dihydro-6H-isoindolo[2,1-*a*]indol-6-one, 6**

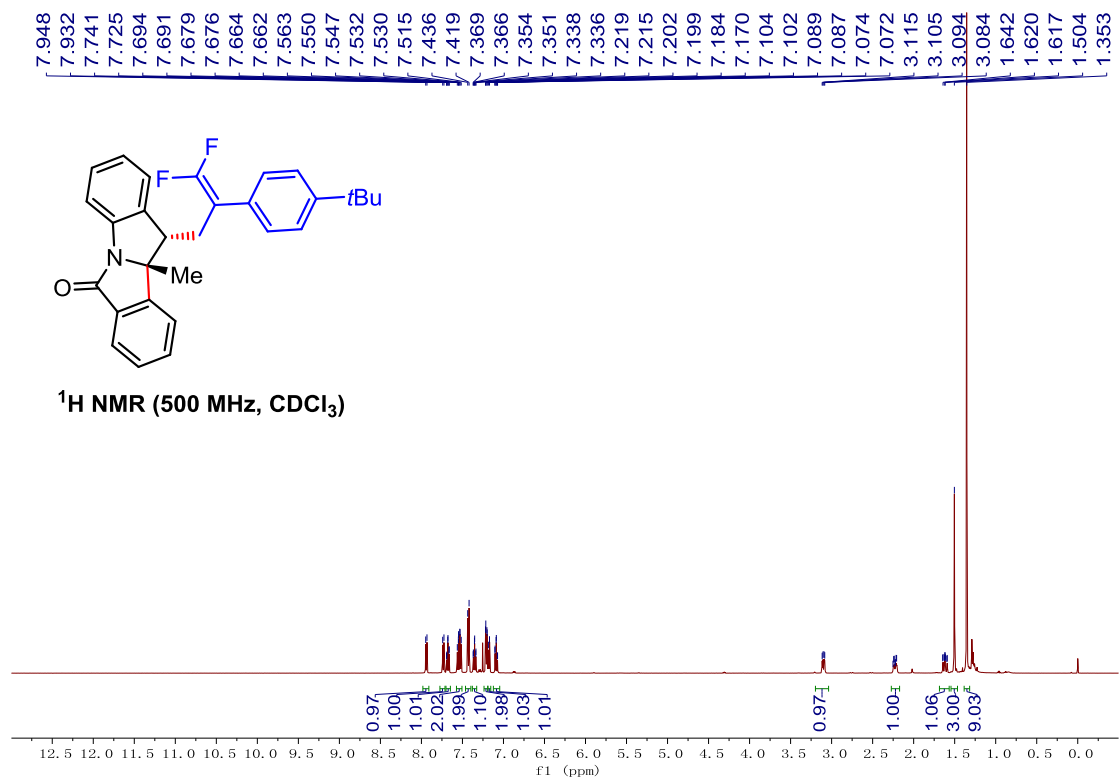

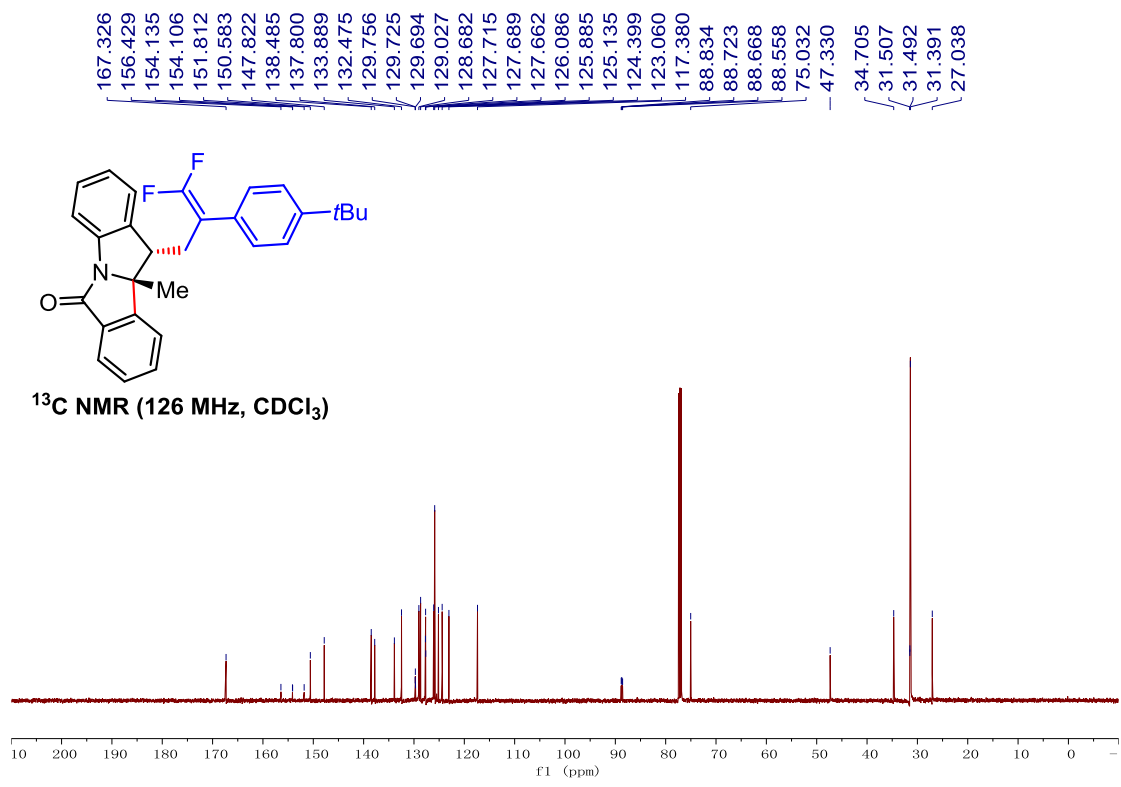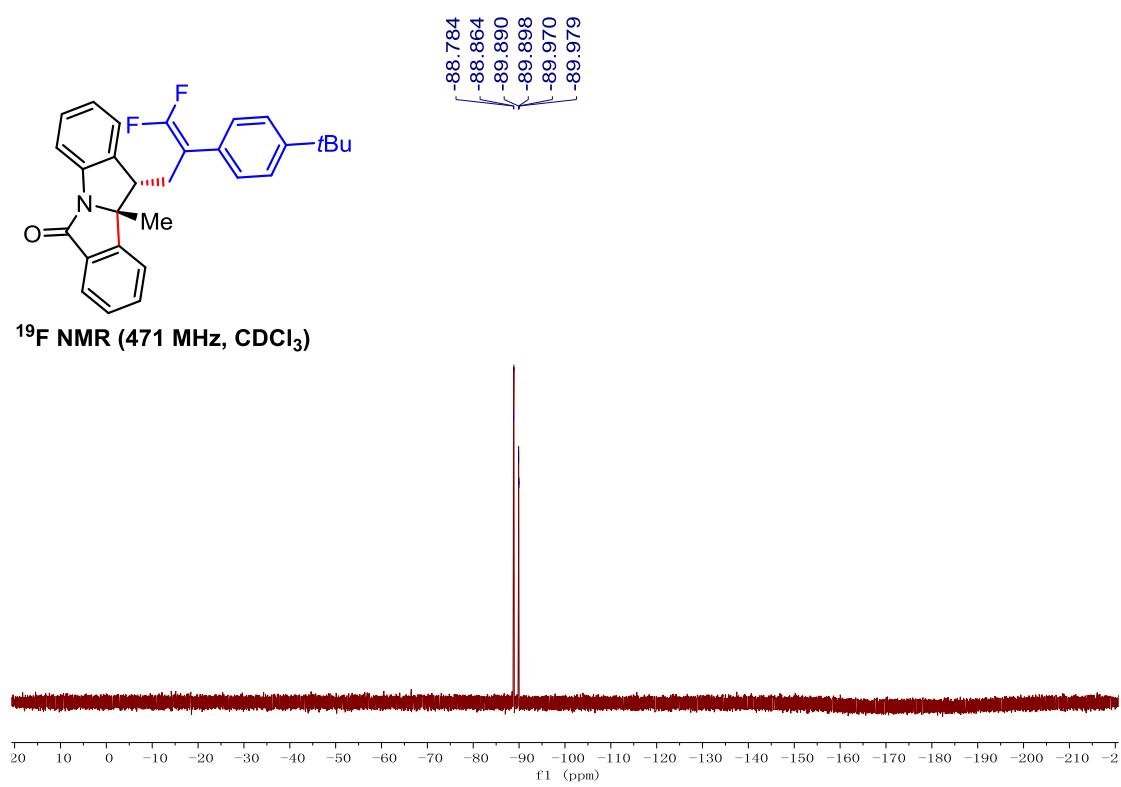

**(10*R*,11*S*)-11-(3,3-Difluoro-2-(4-(methylthio)phenyl)allyl)-10*b*-methyl-10*b*,11-dihydro-6*H*-isoindolo[2,1-*a*]indol-6-one, 7**

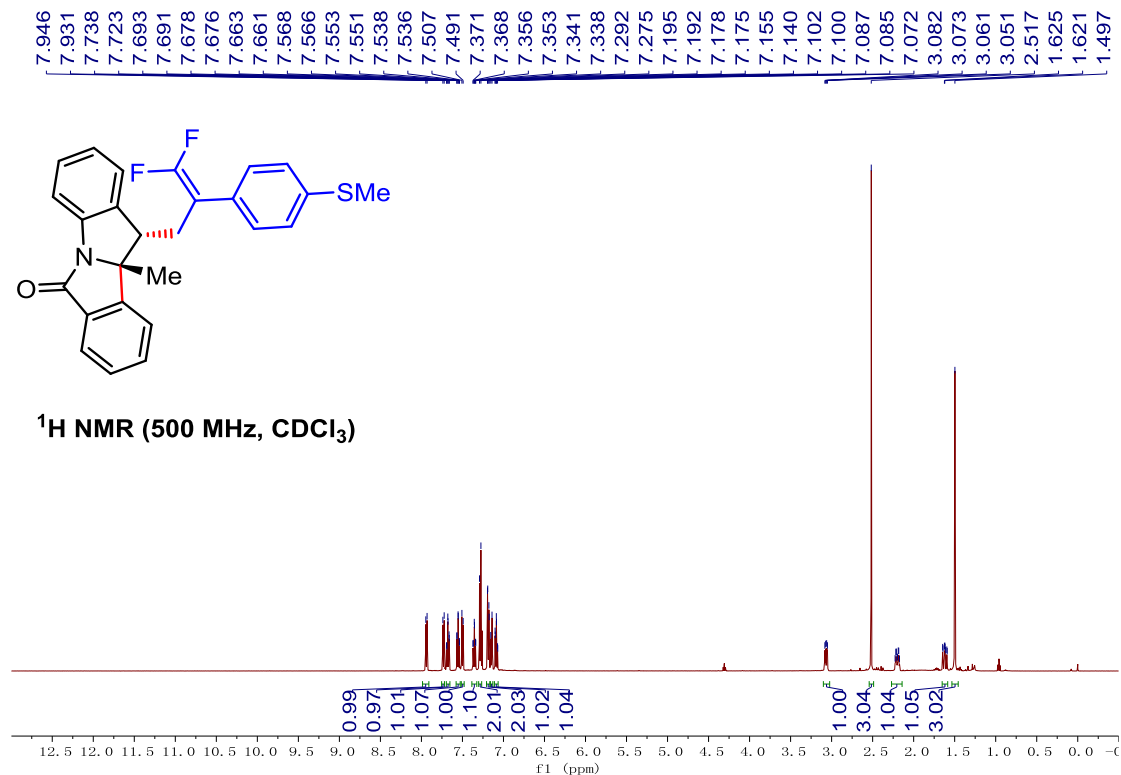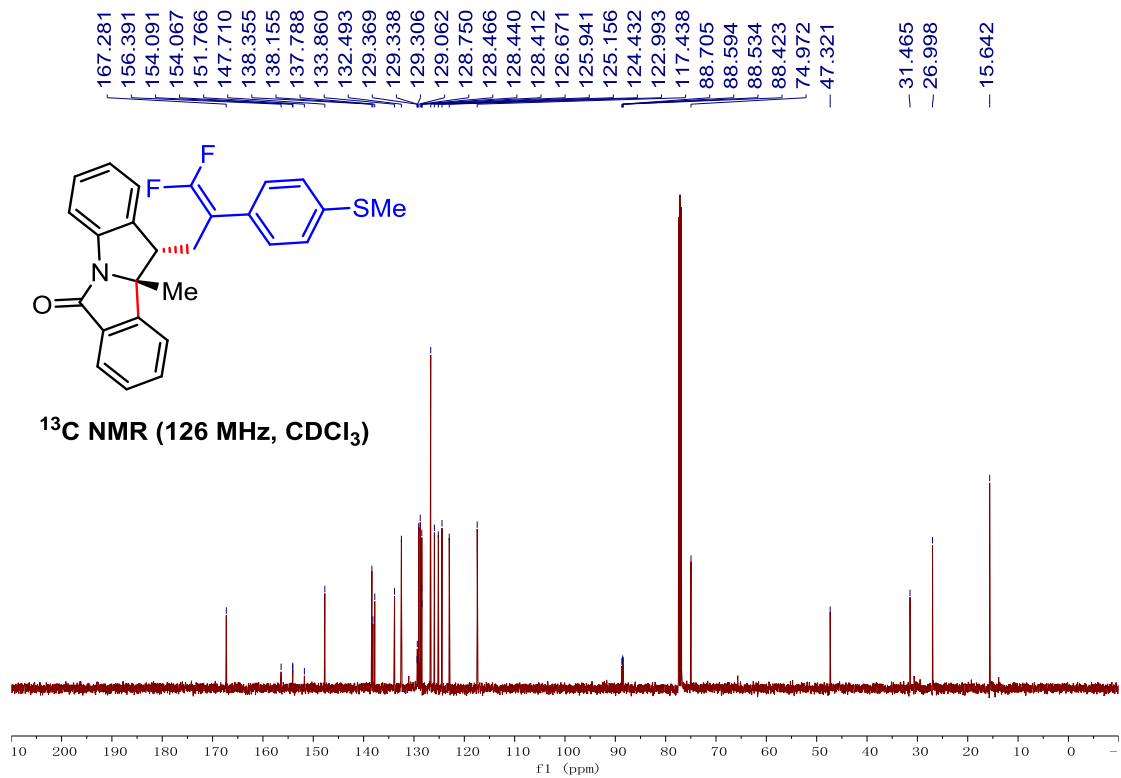

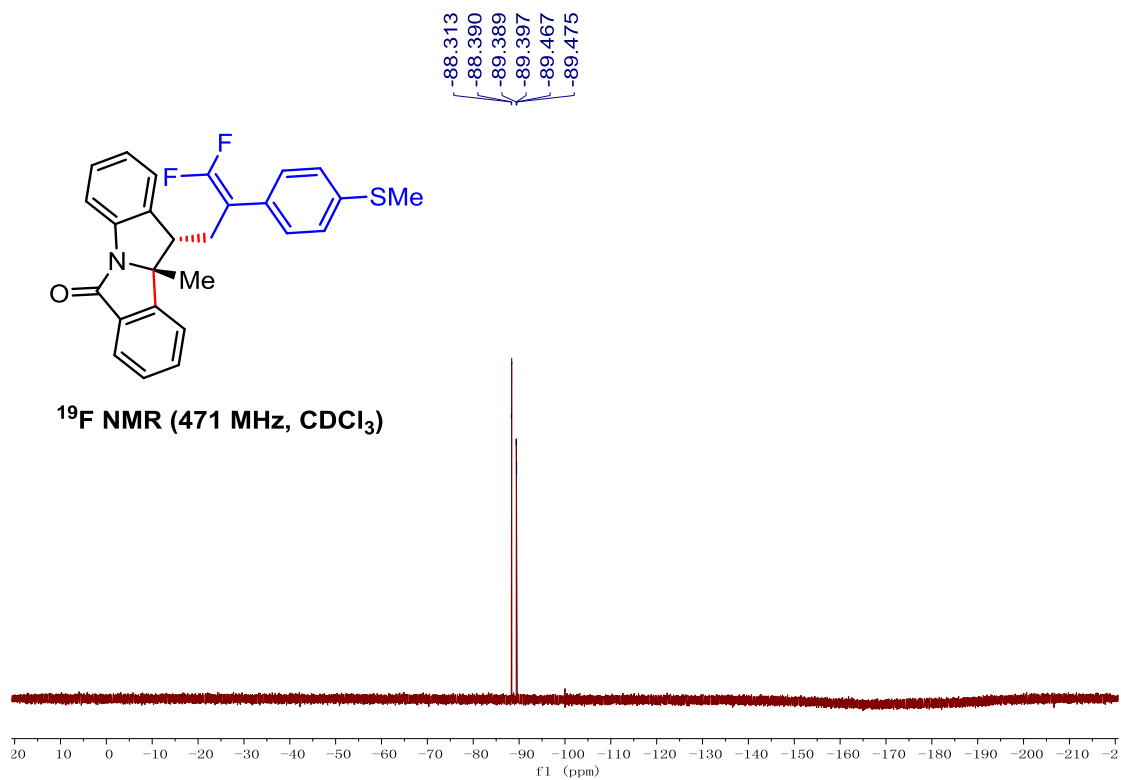

**(10bR,11S)-11-(3,3-Difluoro-2-(4-(trifluoromethoxy)phenyl)allyl)-10b-methyl-10b,11-dihydro-6H-isoindolo[2,1-a]indol-6-one, 8**

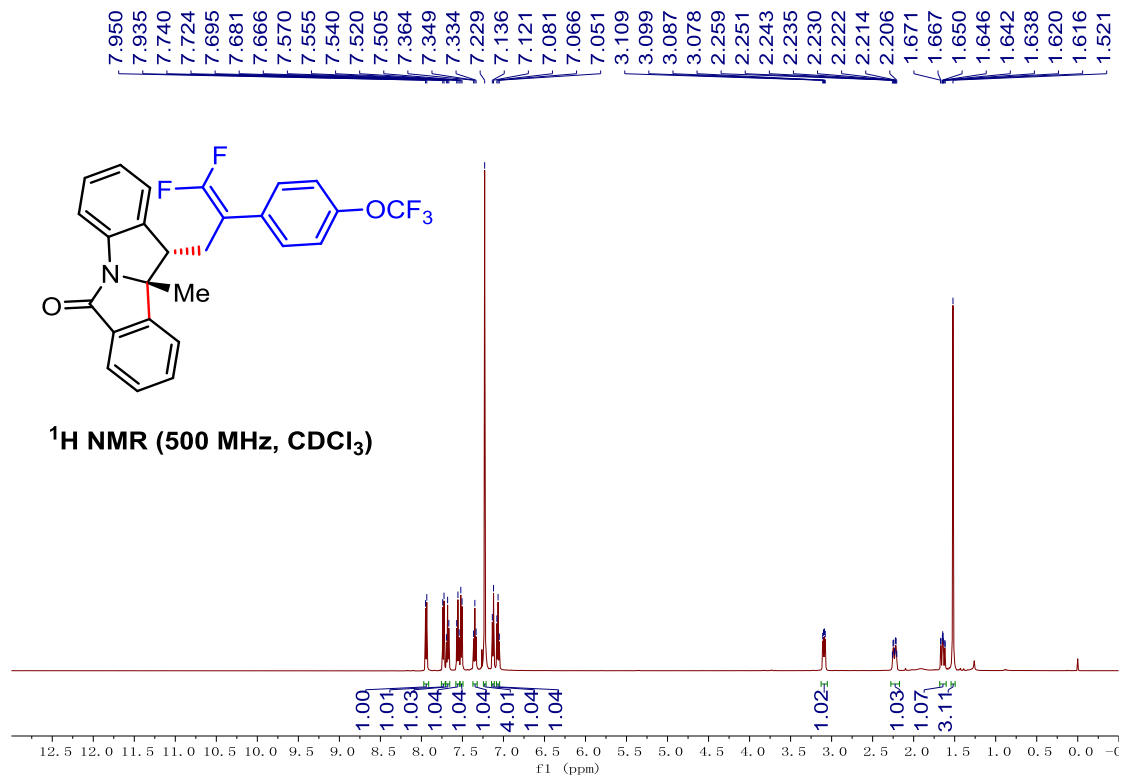

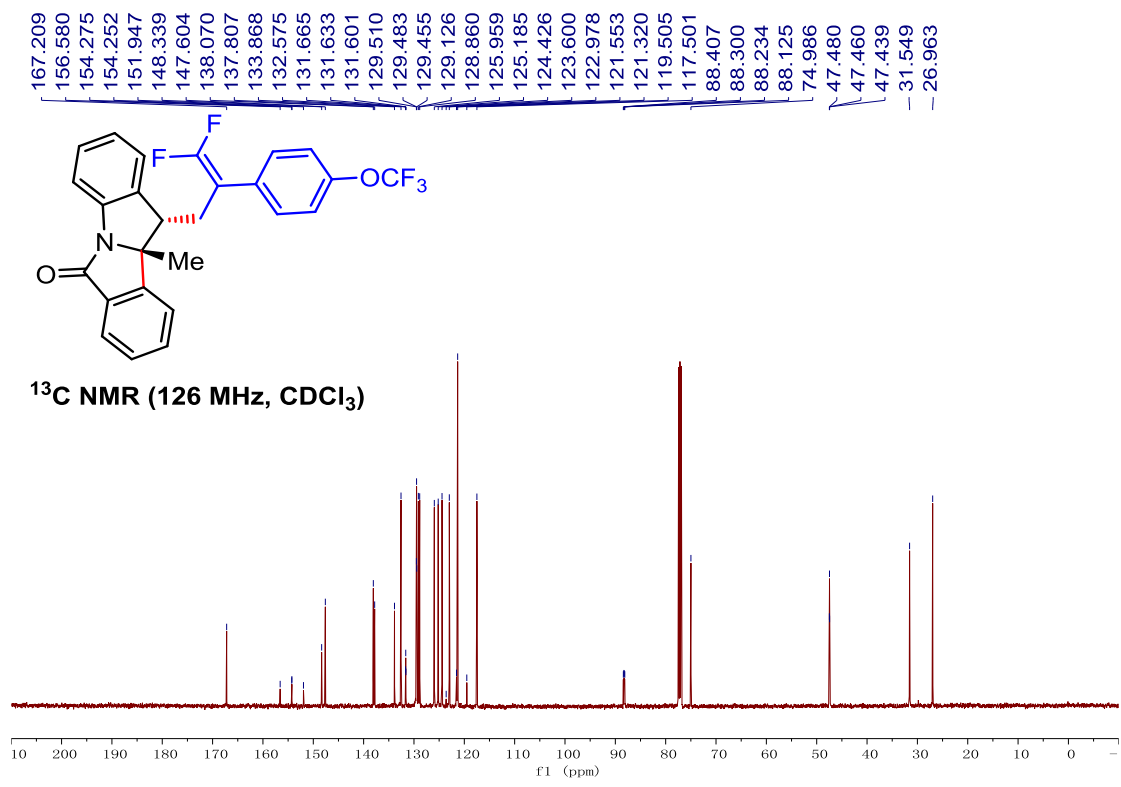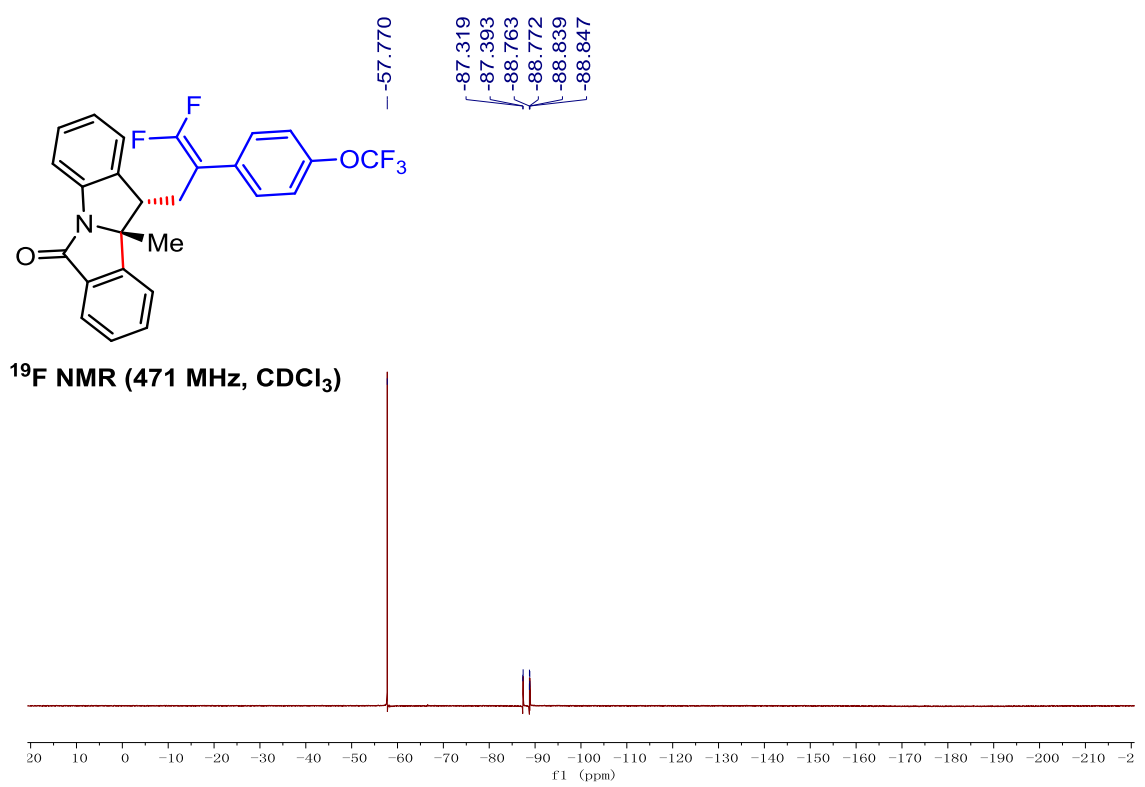

**(10*bR*,11*R*)-11-(2-(4-(Diphenylamino)phenyl)-3,3-difluoroallyl)-10*b*-methyl-10*b*,11-dihydro-6*H*-isoindolo[2,1-*a*]indol-6-one, 9**

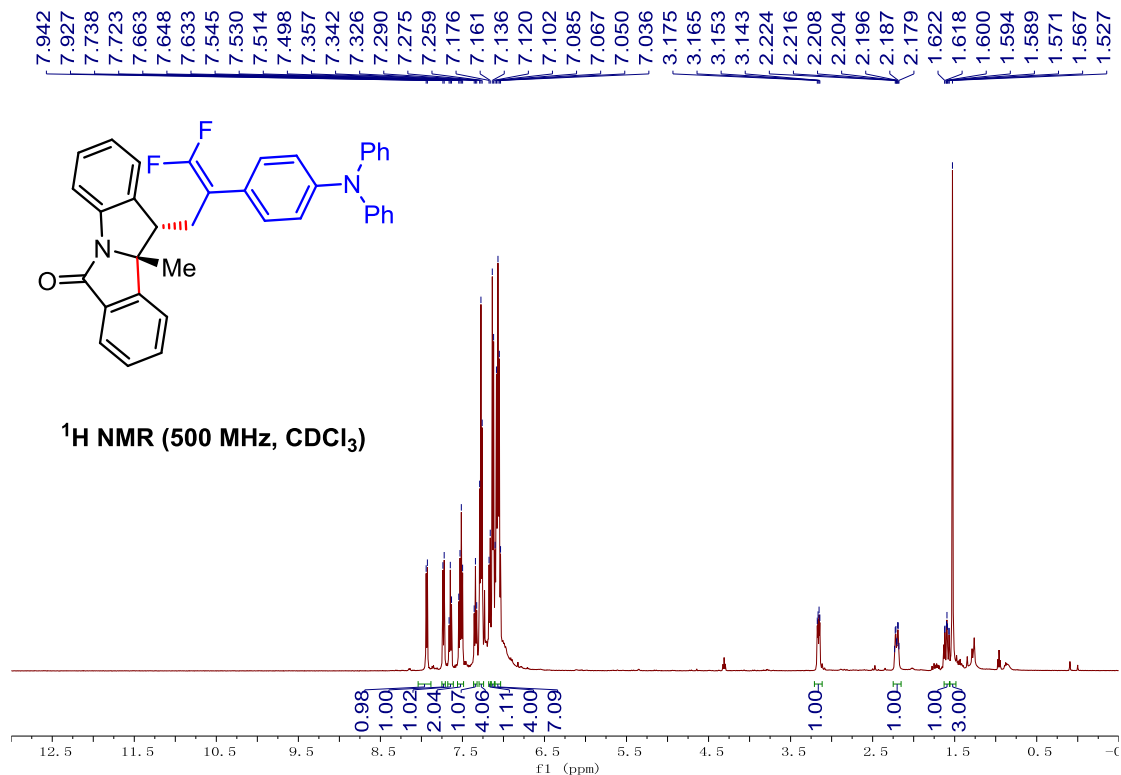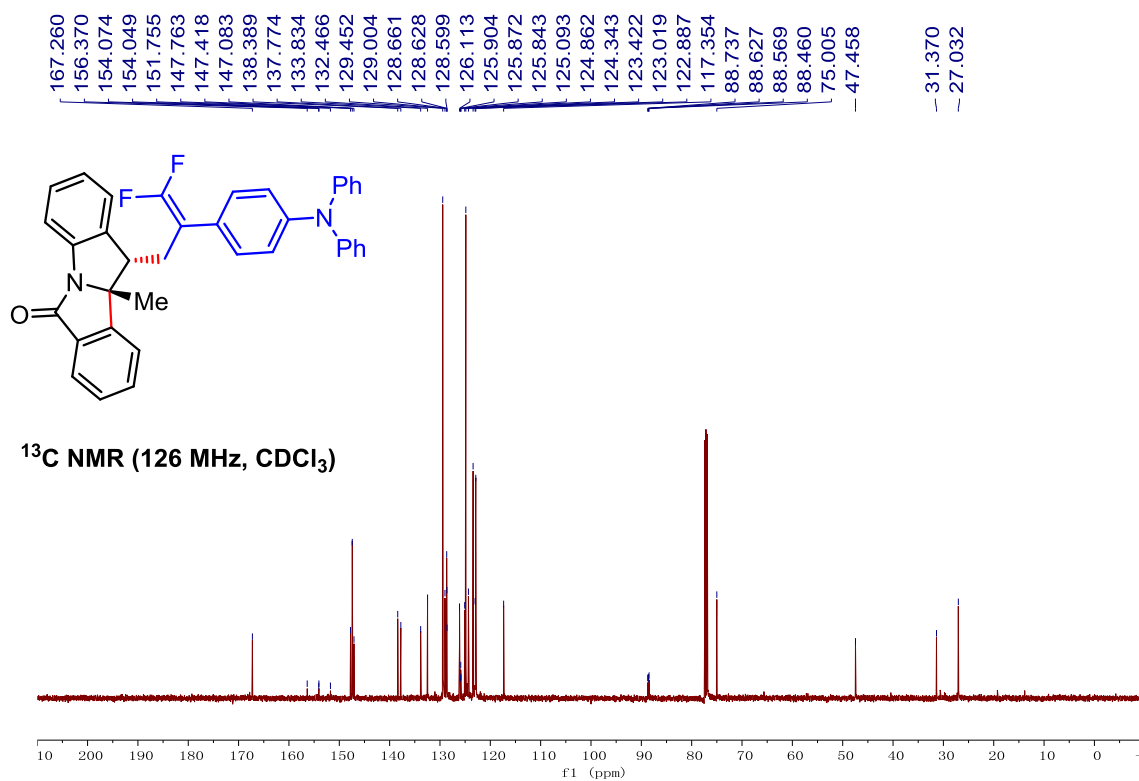

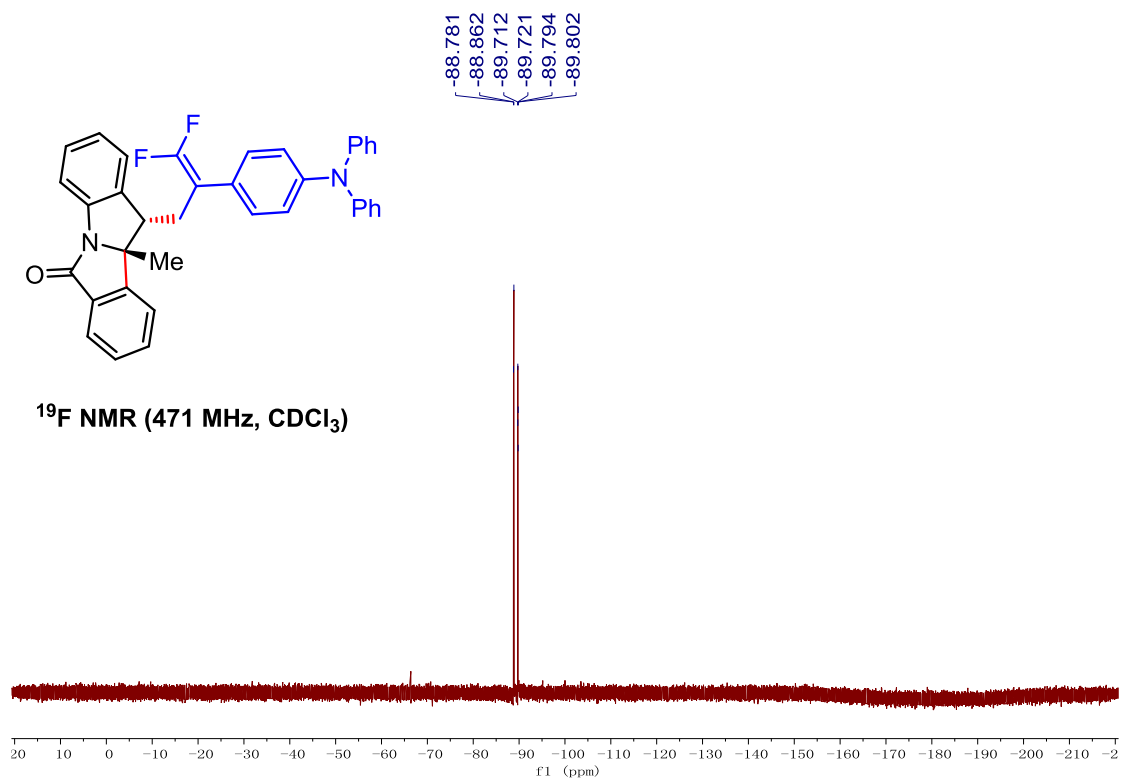

***tert*-Butyl (4-(1,1-difluoro-3-((10*bR*,11*S*)-10*b*-methyl-6-oxo-10*b*,11-dihydro-6*H*-isoindolo[2,1-*a*]indol-11-yl)prop-1-en-2-yl)phenyl)carbamate, 10**

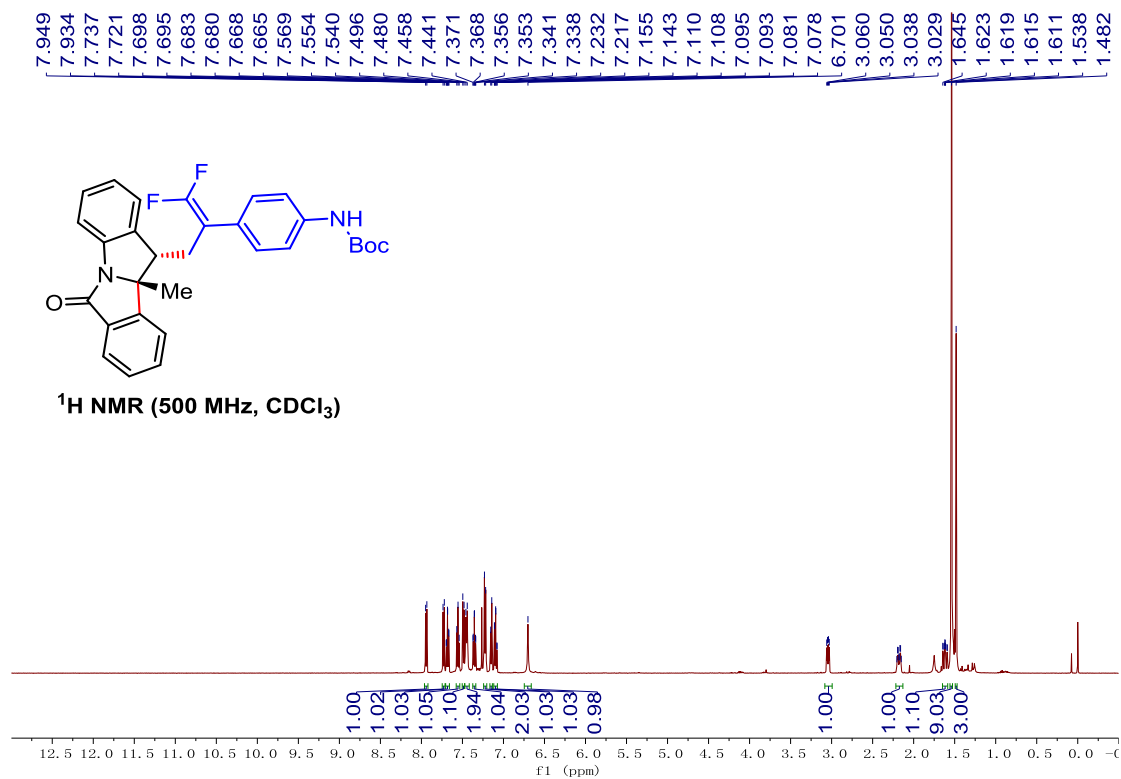



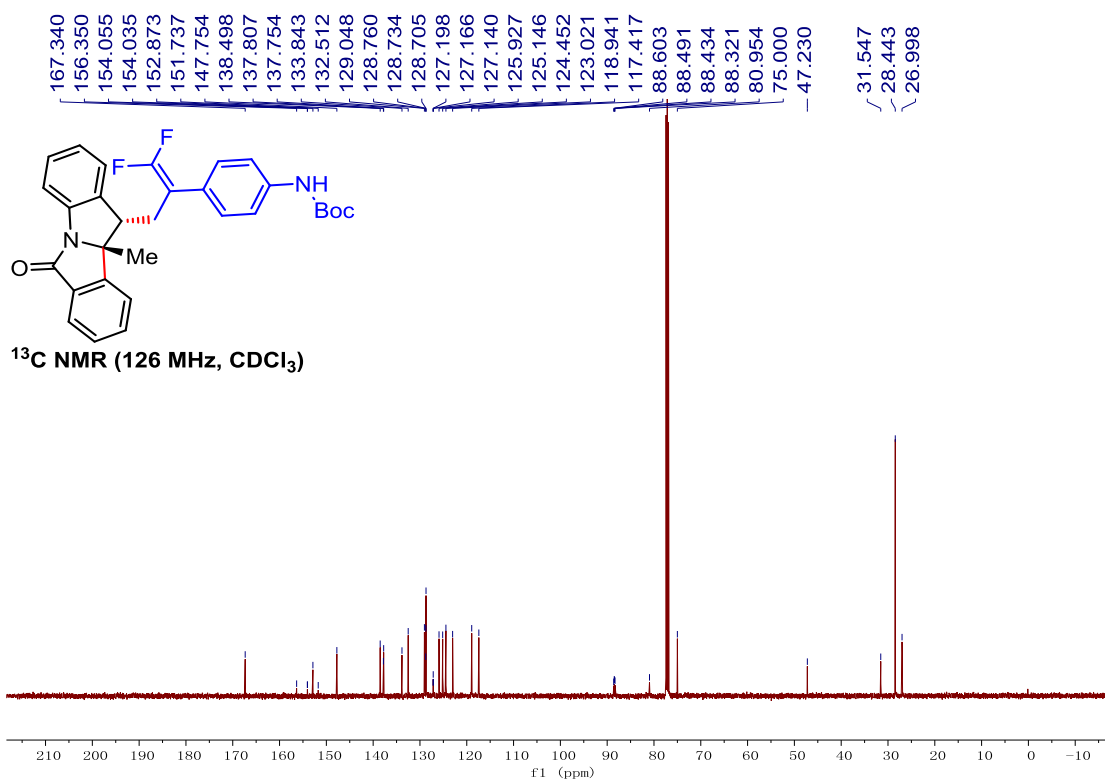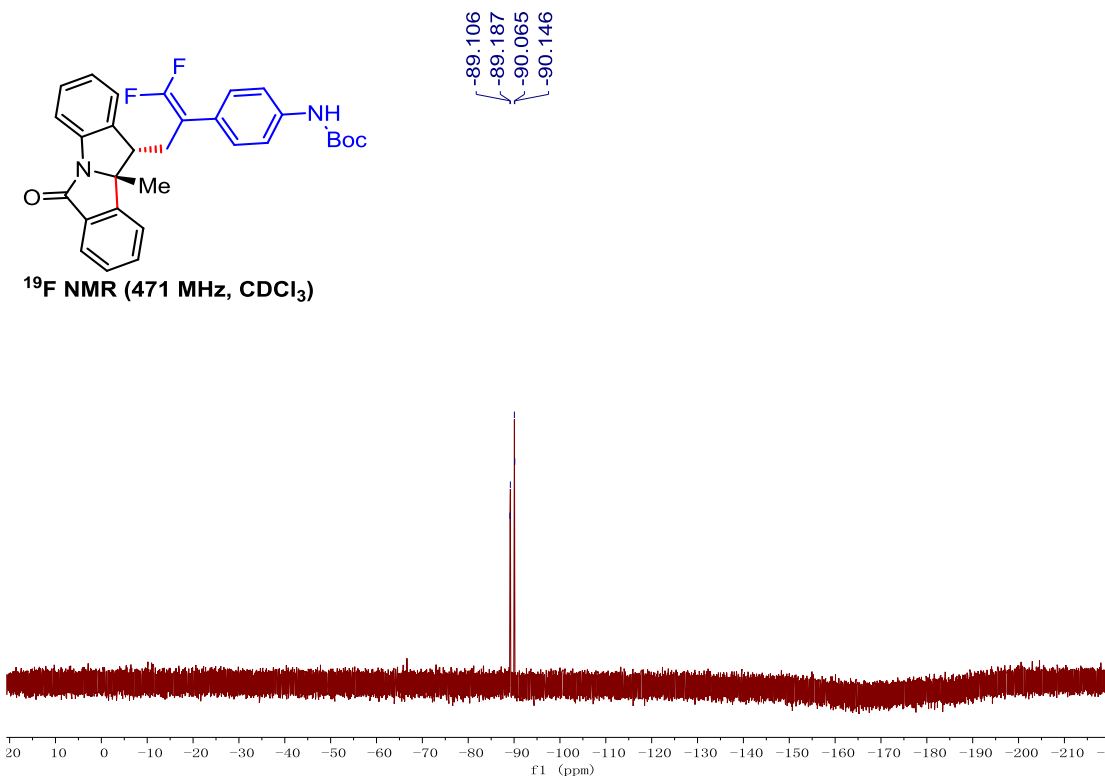

**(10*R*,11*S*)-11-(2-(3-Aminophenyl)-3,3-difluoroallyl)-10*b*-methyl-10*b*,11-dihydro-6*H*-isoindolo[2,1-*a*]indol-6-one, 11**

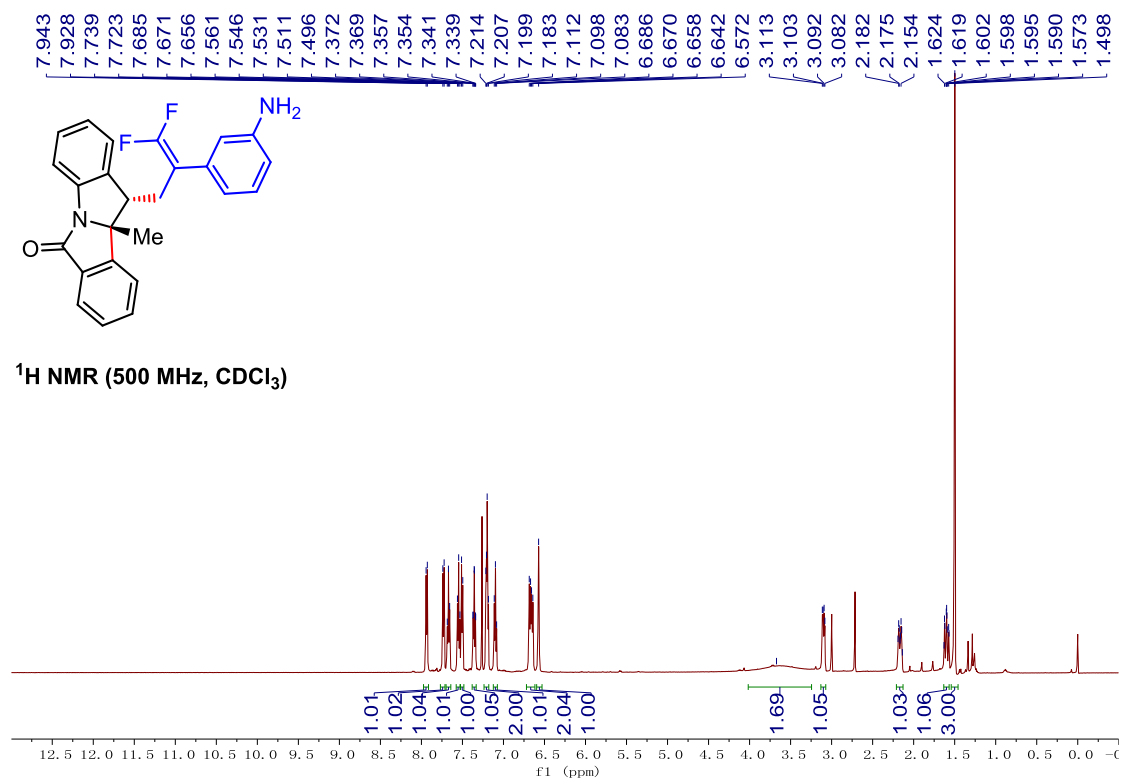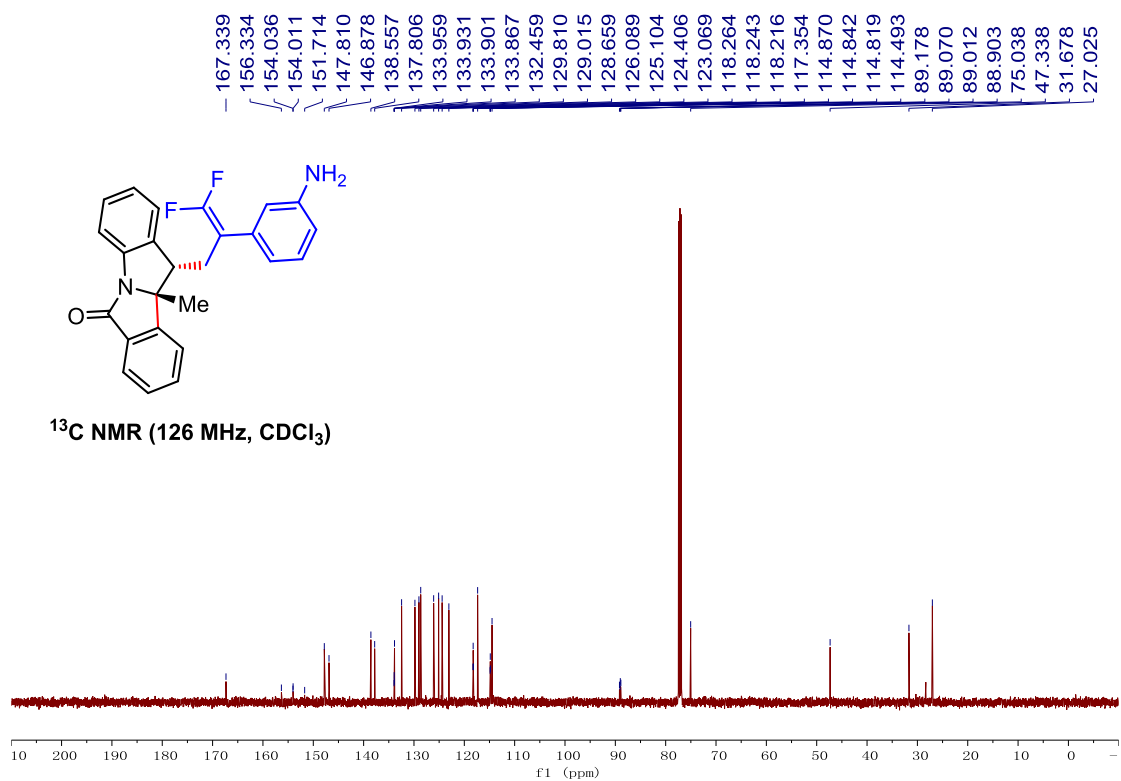

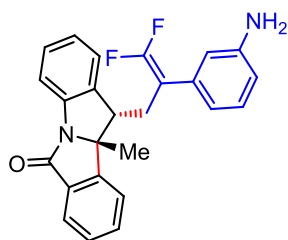

-88.721  
-88.799  
-89.167  
-89.245

<sup>19</sup>F NMR (471 MHz, CDCl<sub>3</sub>)

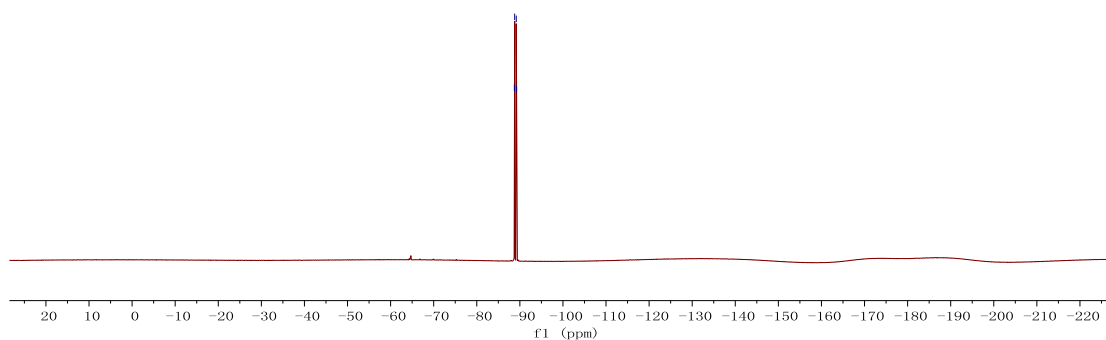

**(10bR,11S)-11-(3,3-Difluoro-2-(*m*-tolyl)allyl)-10b-methyl-10b,11-dihydro-6H-isoindolo[2,1-*a*]indol-6-one, 12**

7.947  
7.932  
7.744  
7.728  
7.681  
7.679  
7.667  
7.664  
7.566  
7.564  
7.551  
7.550  
7.536  
7.534  
7.506  
7.491  
7.374  
7.371  
7.358  
7.356  
7.343  
7.340  
7.320  
7.305  
7.290  
7.196  
7.180  
7.142  
7.126  
7.115  
7.113  
7.100  
7.098  
7.085  
7.083  
7.079  
7.064  
7.052  
3.090  
3.080  
3.068  
3.059  
2.399  
1.635  
1.495

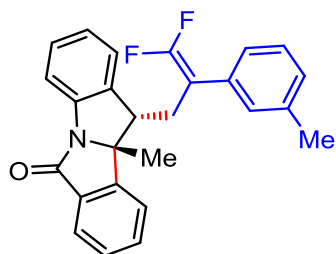

<sup>1</sup>H NMR (500 MHz, CDCl<sub>3</sub>)

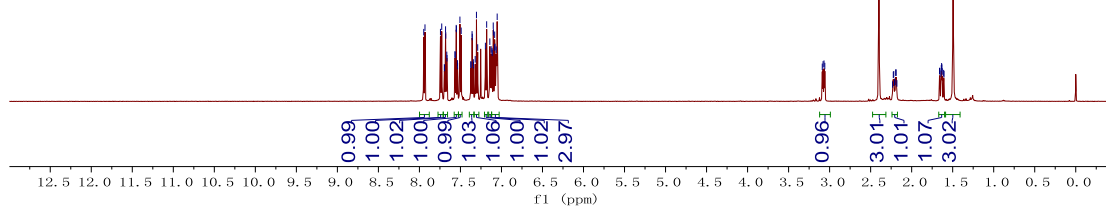

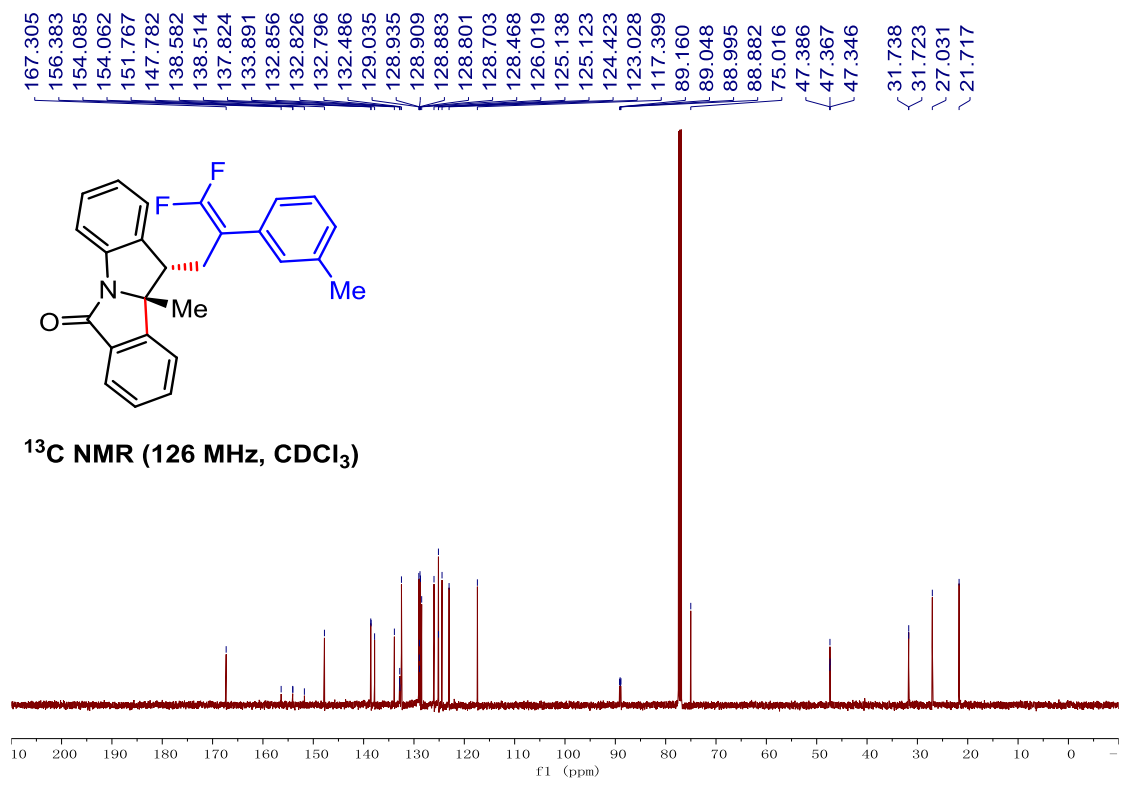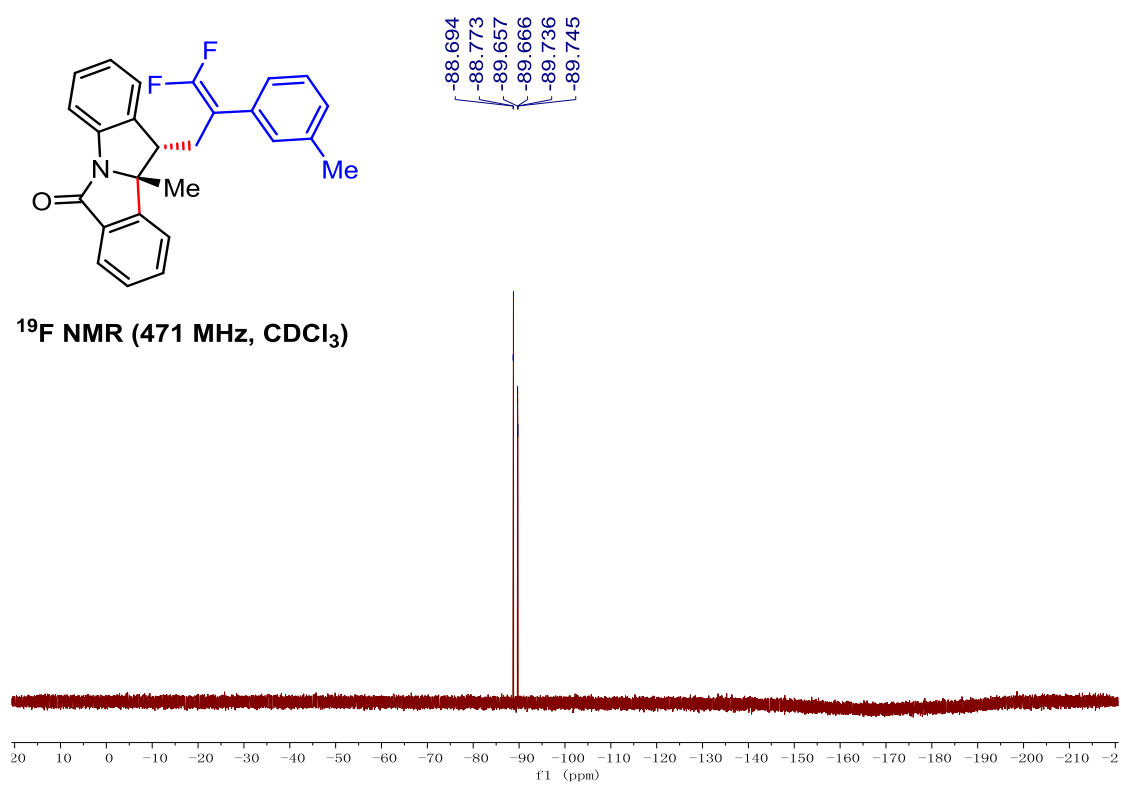

**(10*R*,11*S*)-11-(2-(Benzo[*d*][1,3]dioxol-5-yl)-3,3-difluoroallyl)-10*b*-methyl-10*b*,11-dihydro-6*H*-isoindolo[2,1-*a*]indol-6-one, 13**

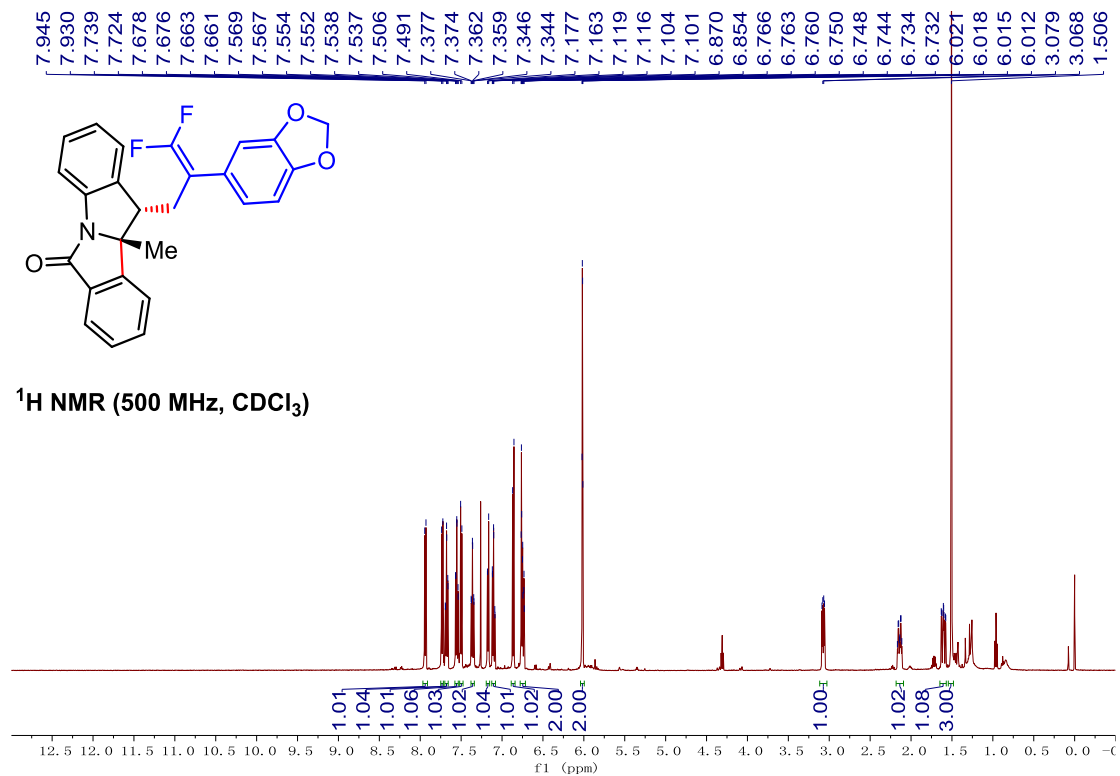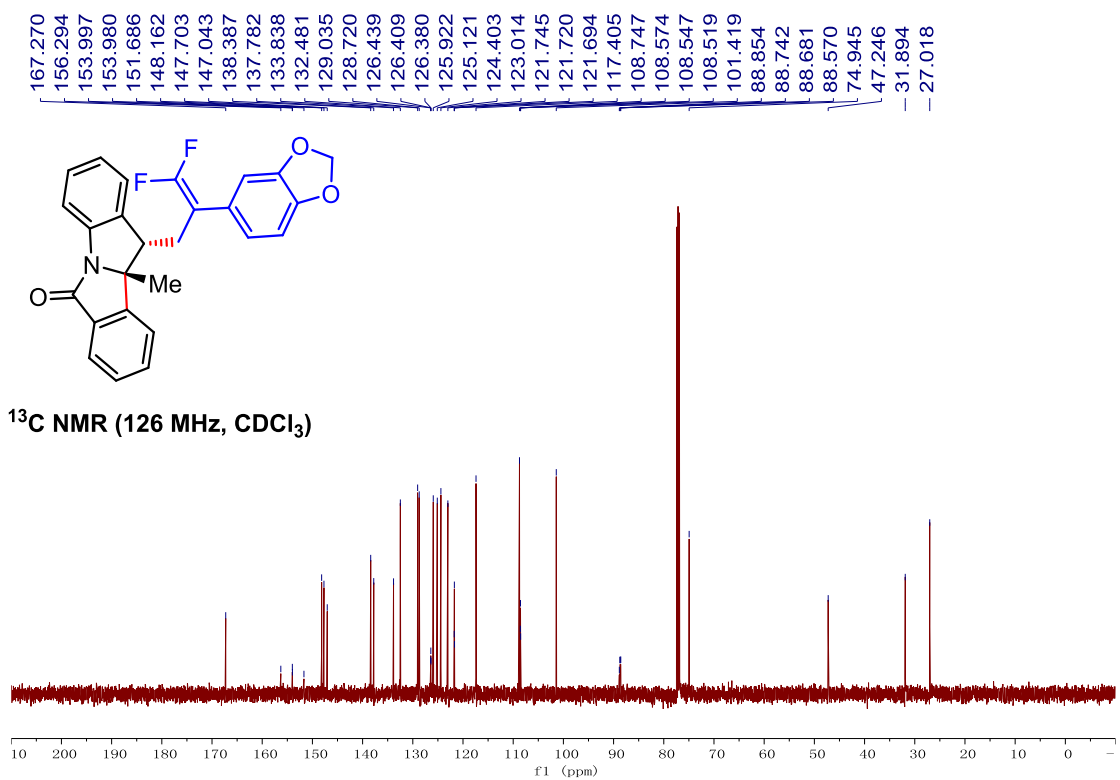

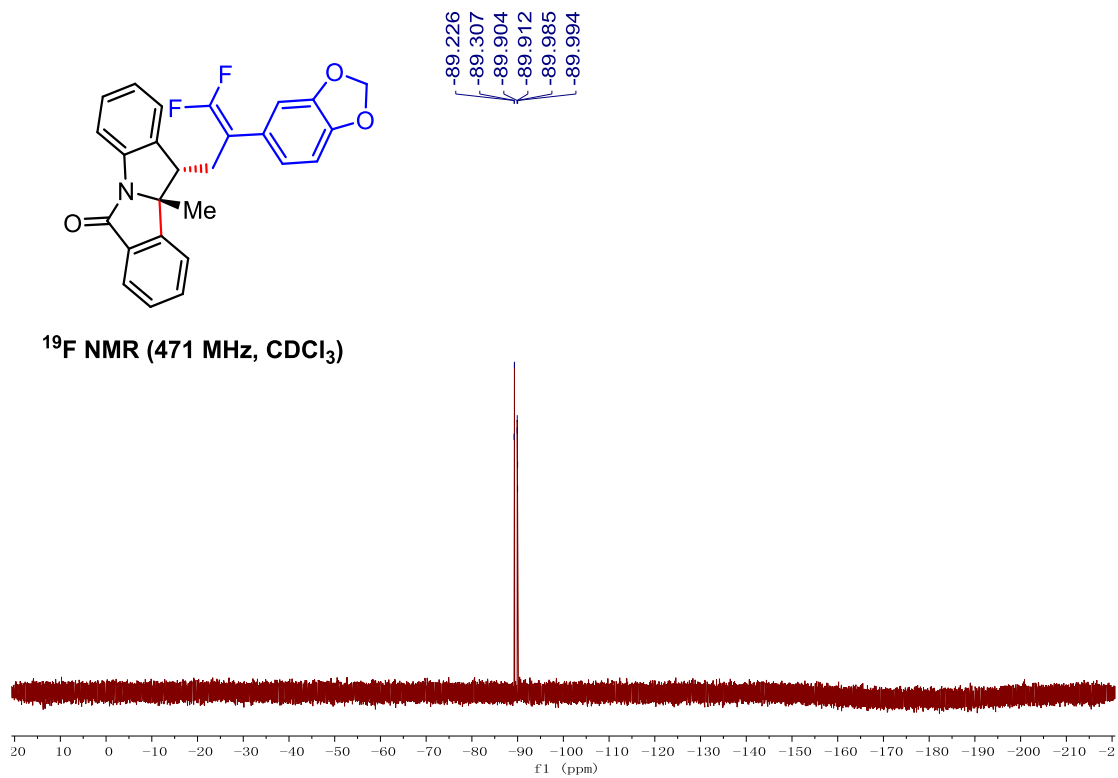

**(10*b**R*,11*S*)-11-(2-([1,1'-Biphenyl]-4-yl)-3,3-difluoroallyl)-10*b*-methyl-10*b*,11-dihydro-6*H*-isoindolo[2,1-*a*]indol-6-one, 14**

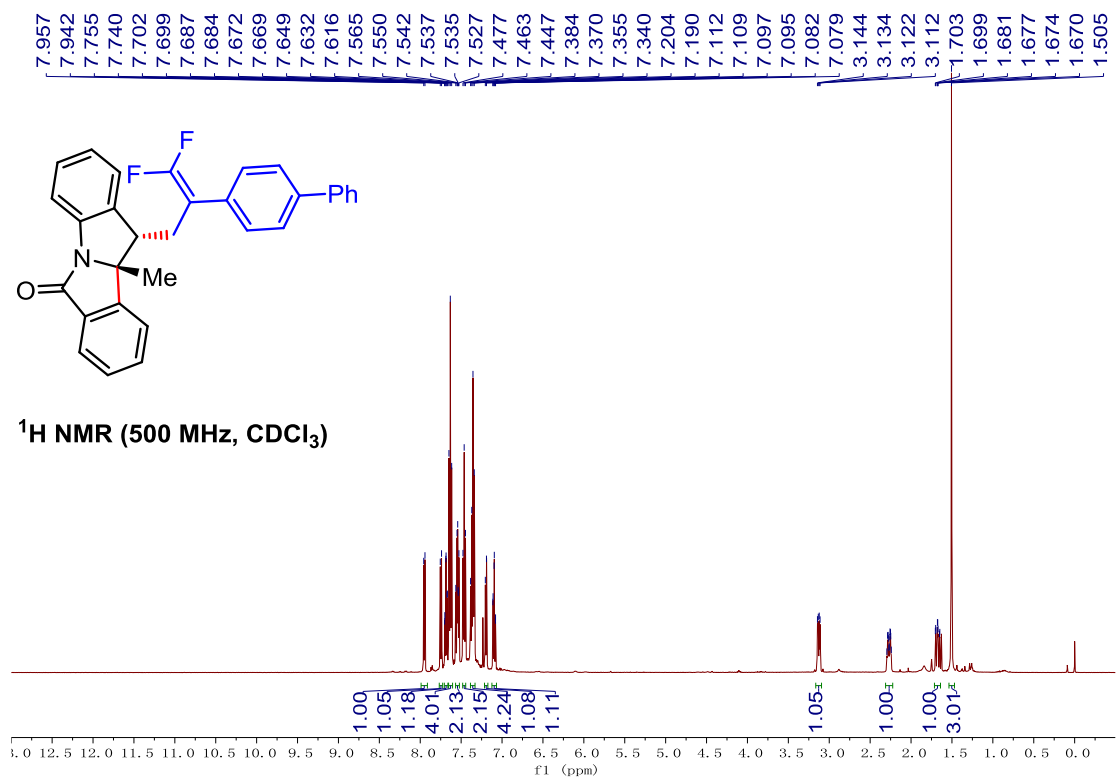

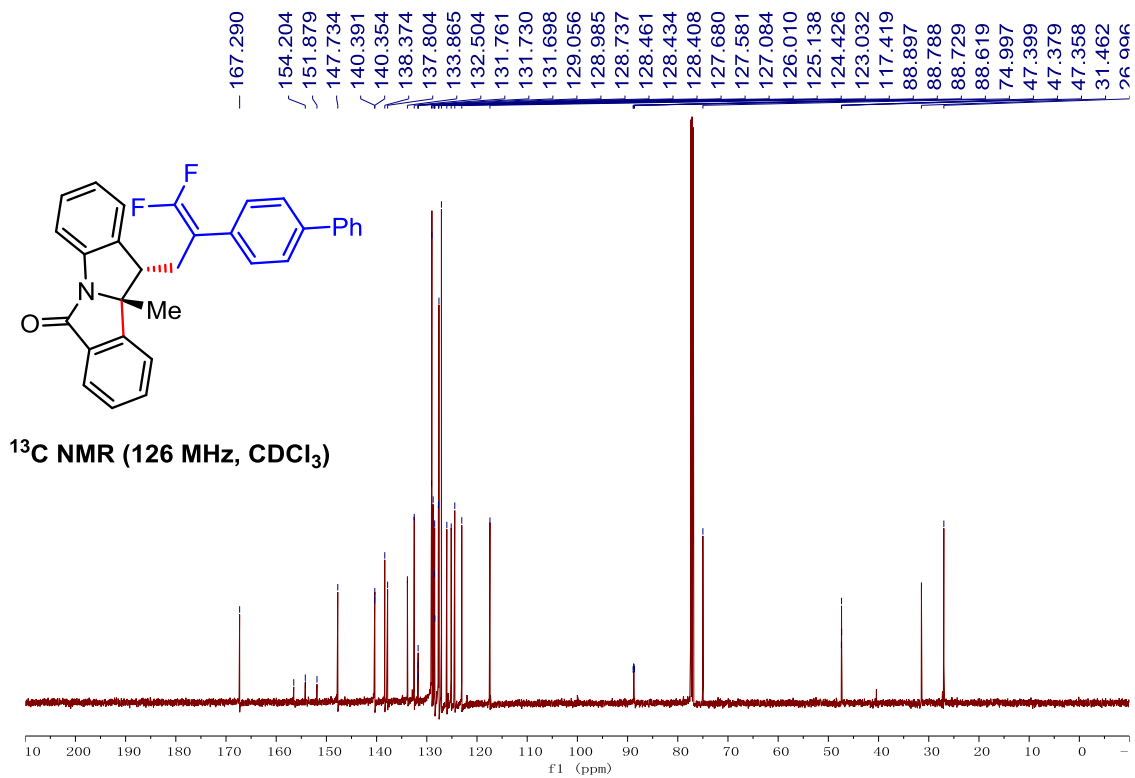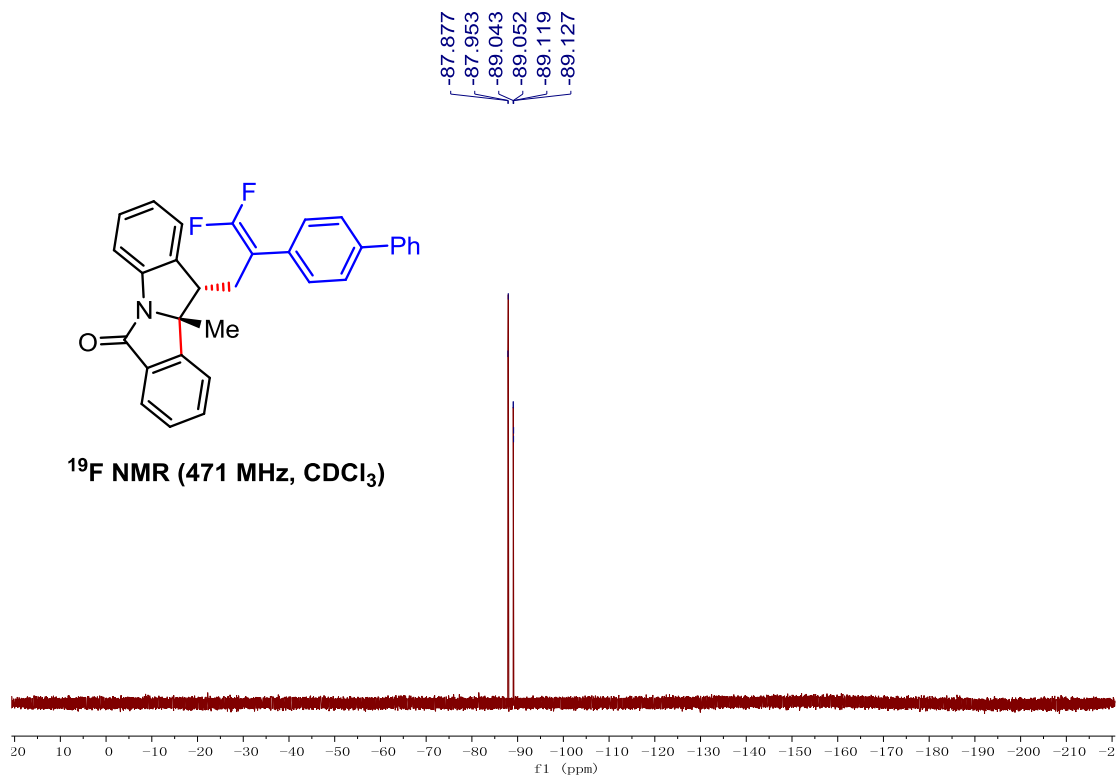

**(10*R*,11*S*)-11-(3,3-Difluoro-2-(naphthalen-2-yl)allyl)-10*b*-methyl-10*b*,11-dihydro-6*H*-isoindolo[2,1-*a*]indol-6-one, 15**

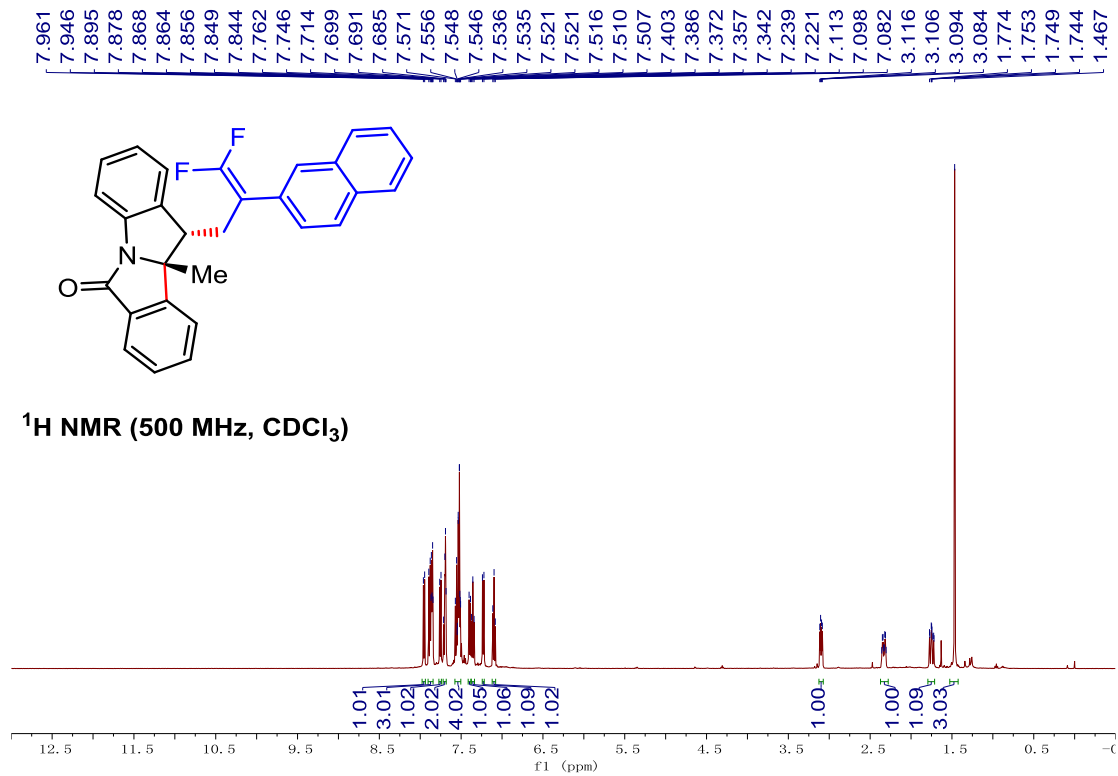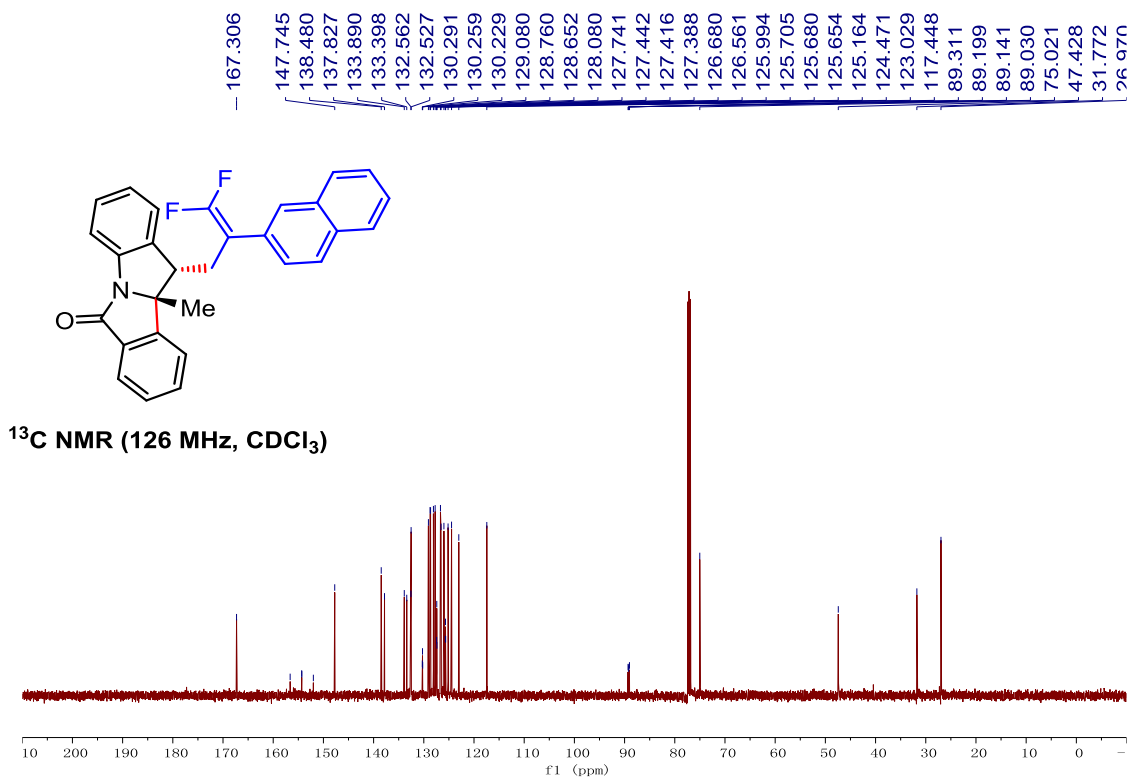



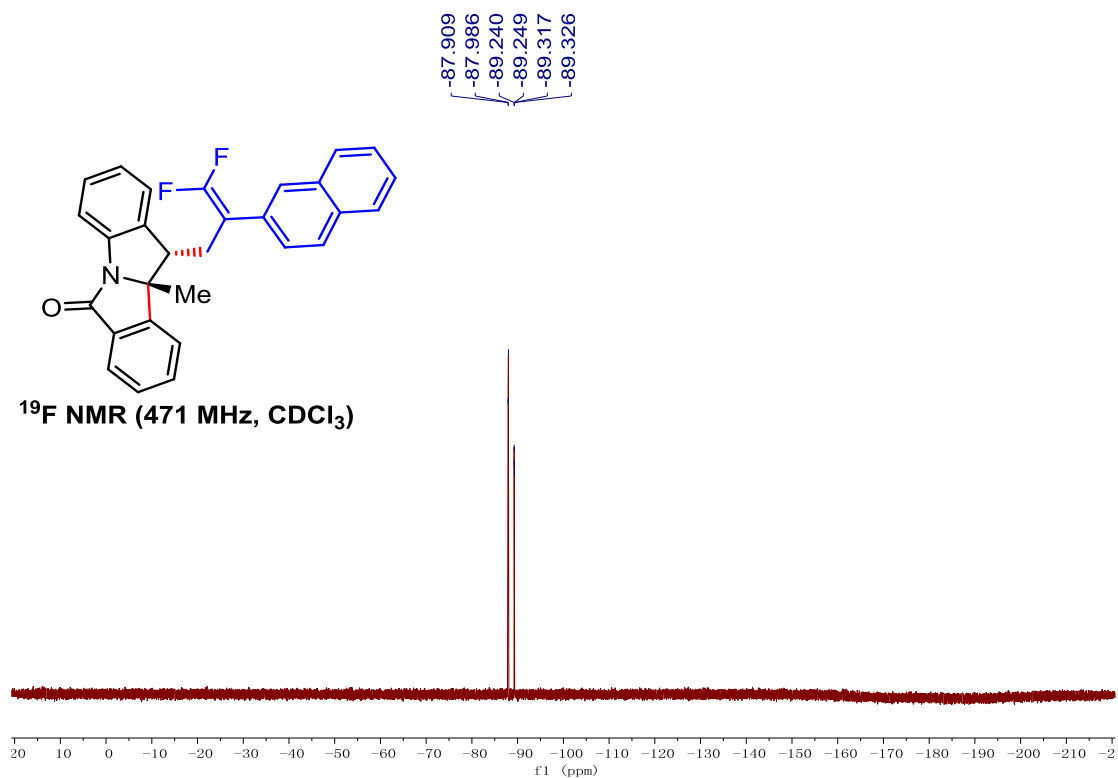

**(10bR,11S)-11-(3,3-Difluoro-2-(4-(methylsulfonyl)phenyl)allyl)-10b-methyl-10b,11-dihydro-6H-isoindolo[2,1-a]indol-6-one, 16**

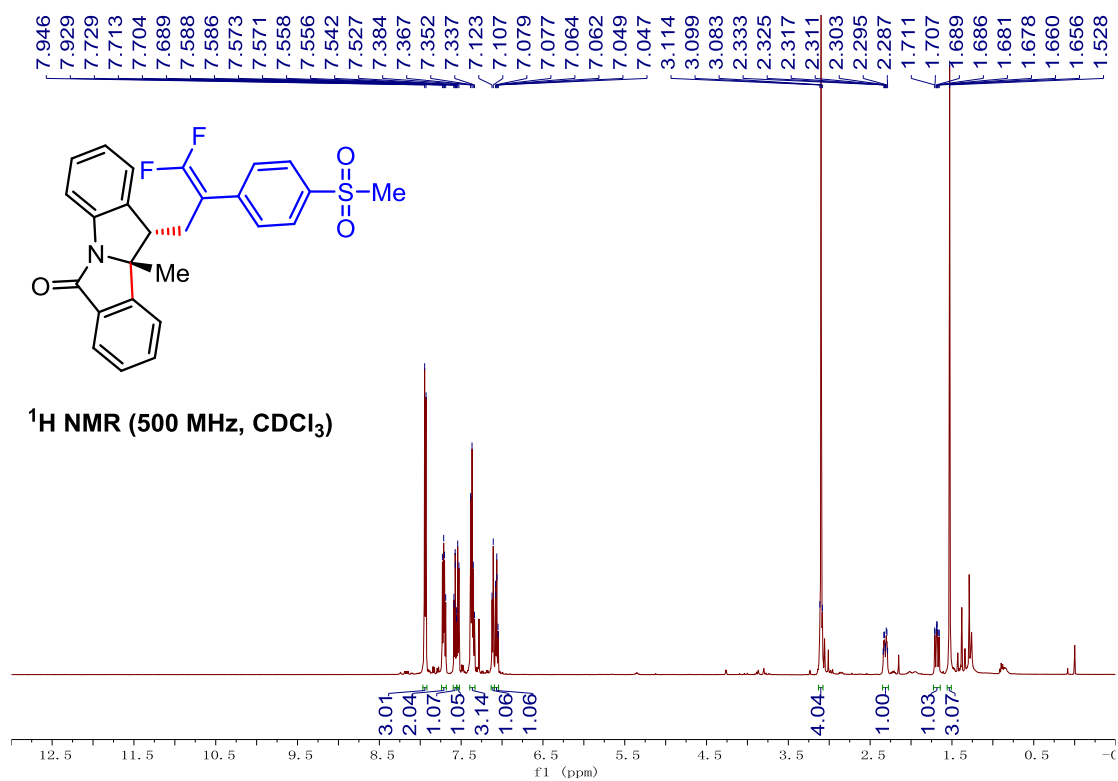

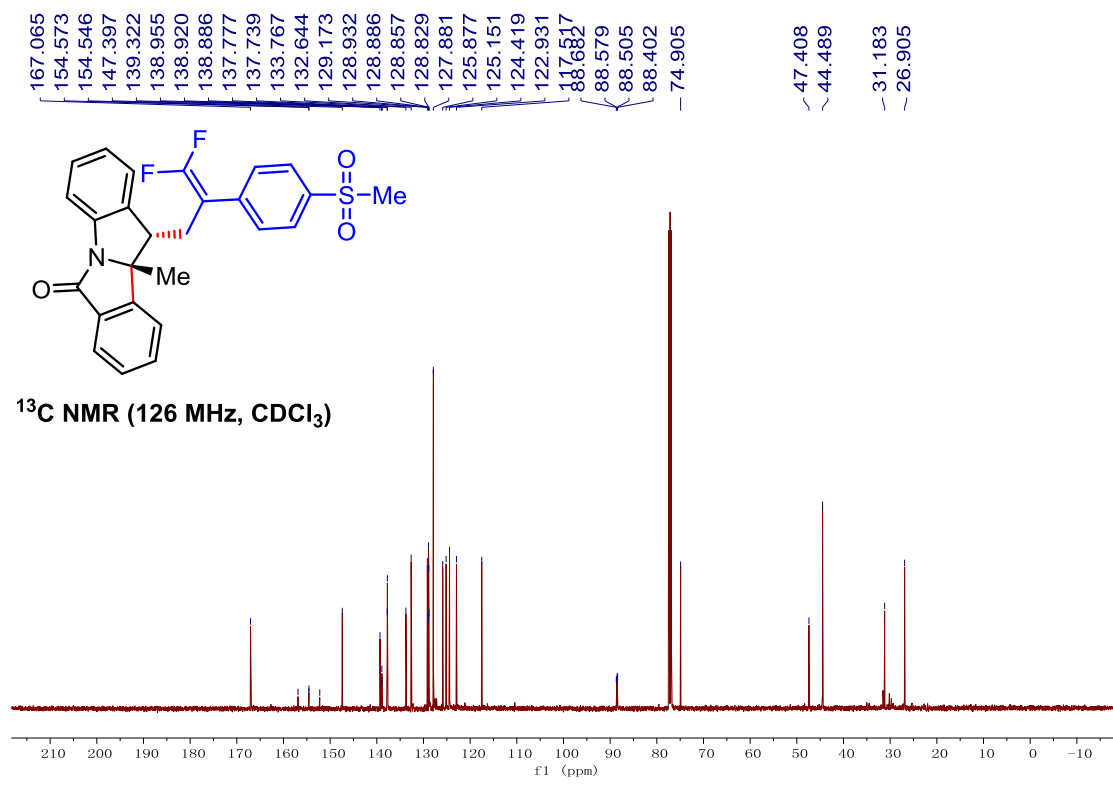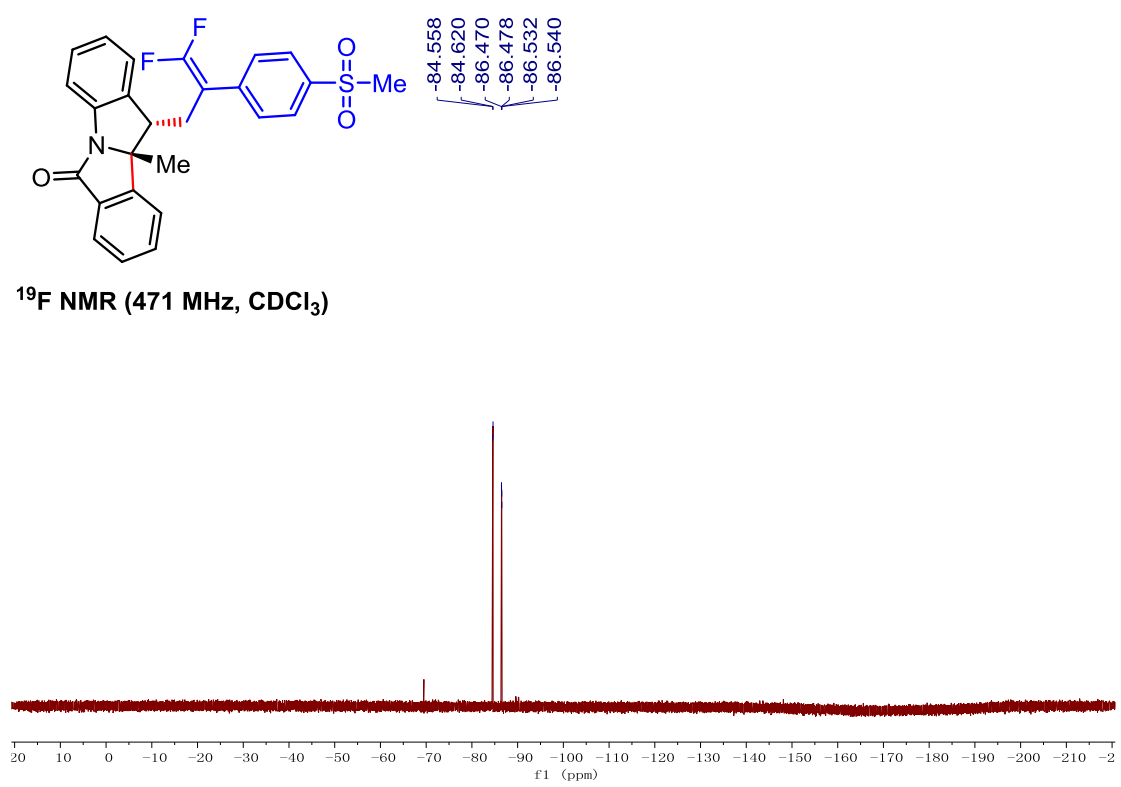

**Methyl 3-(1,1-difluoro-3-((10*bR*,11*S*)-10*b*-methyl-6-oxo-10*b*,11-dihydro-6*H*-isoindolo[2,1-*a*]indol-11-yl)prop-1-en-2-yl)benzoate, 17**

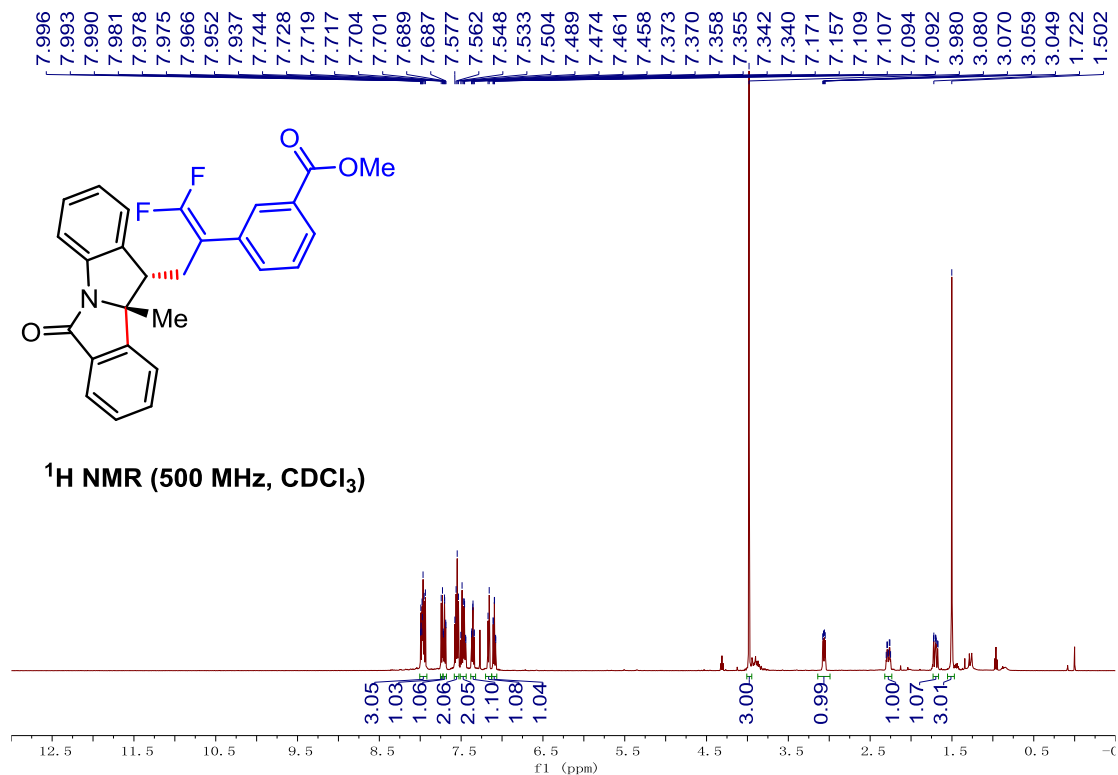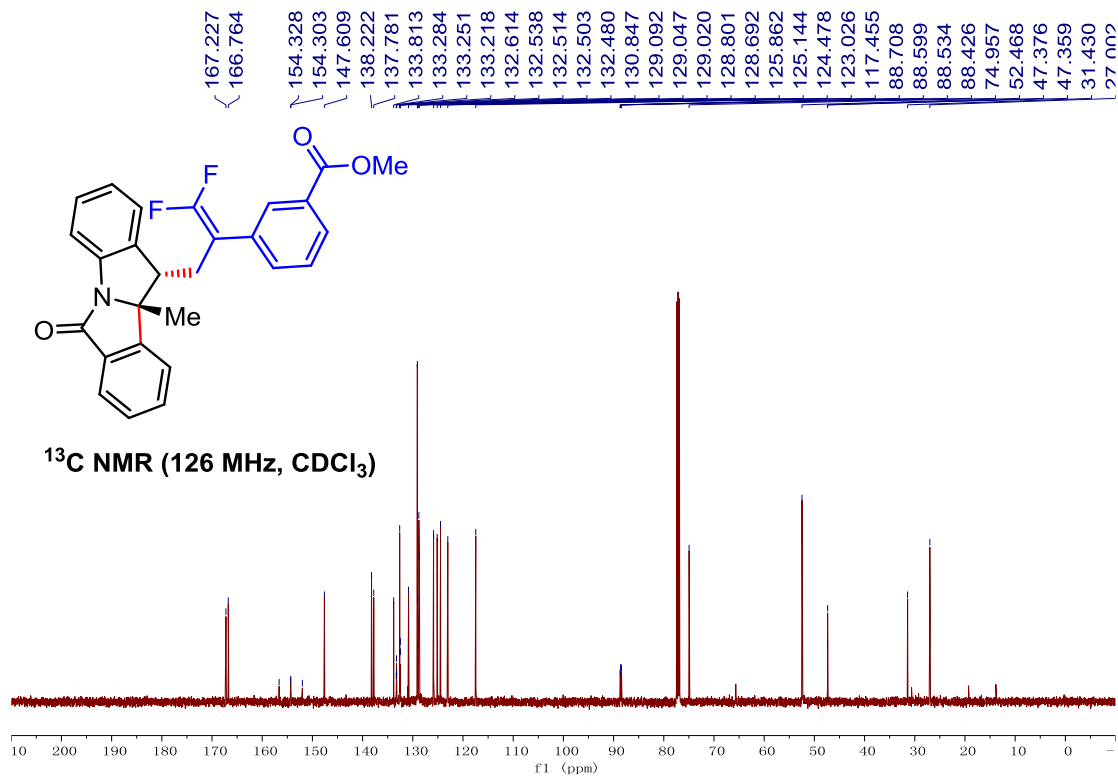

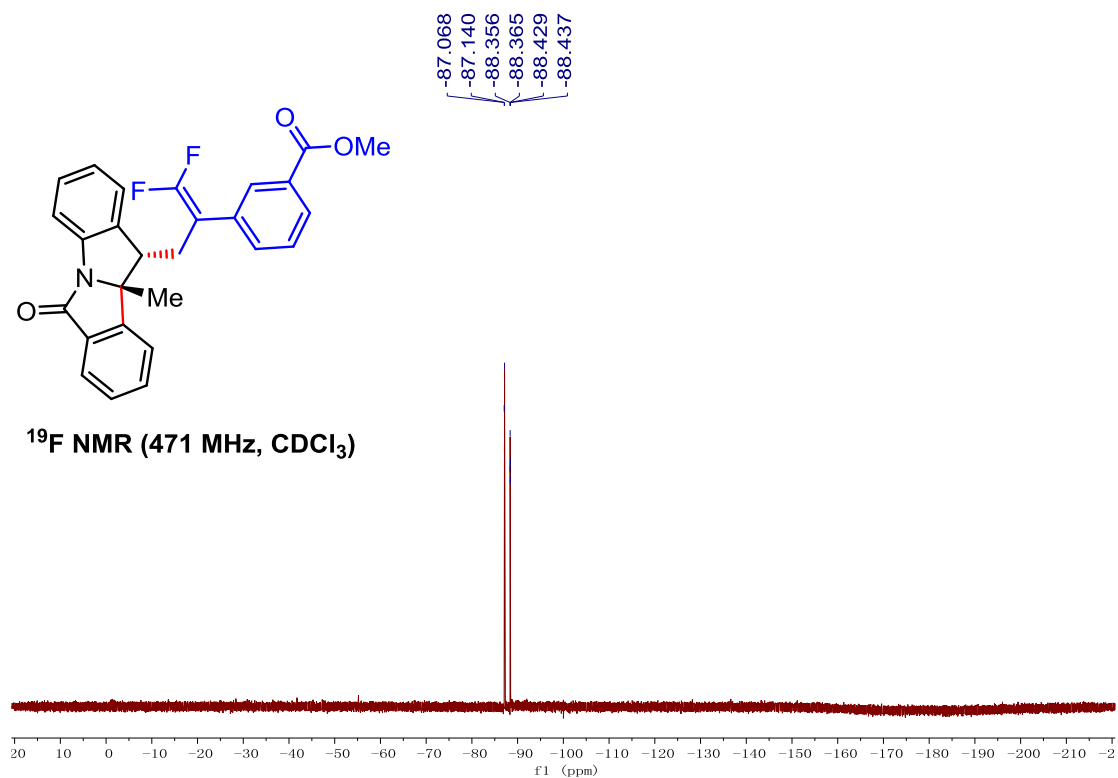

(10*b*R,11*S*)-11-(3,3-Difluoro-2-(4-fluorophenyl)allyl)-10*b*-methyl-10*b*,11-dihydro-6*H*-isoindolo[2,1-*a*]indol-6-one, **18**

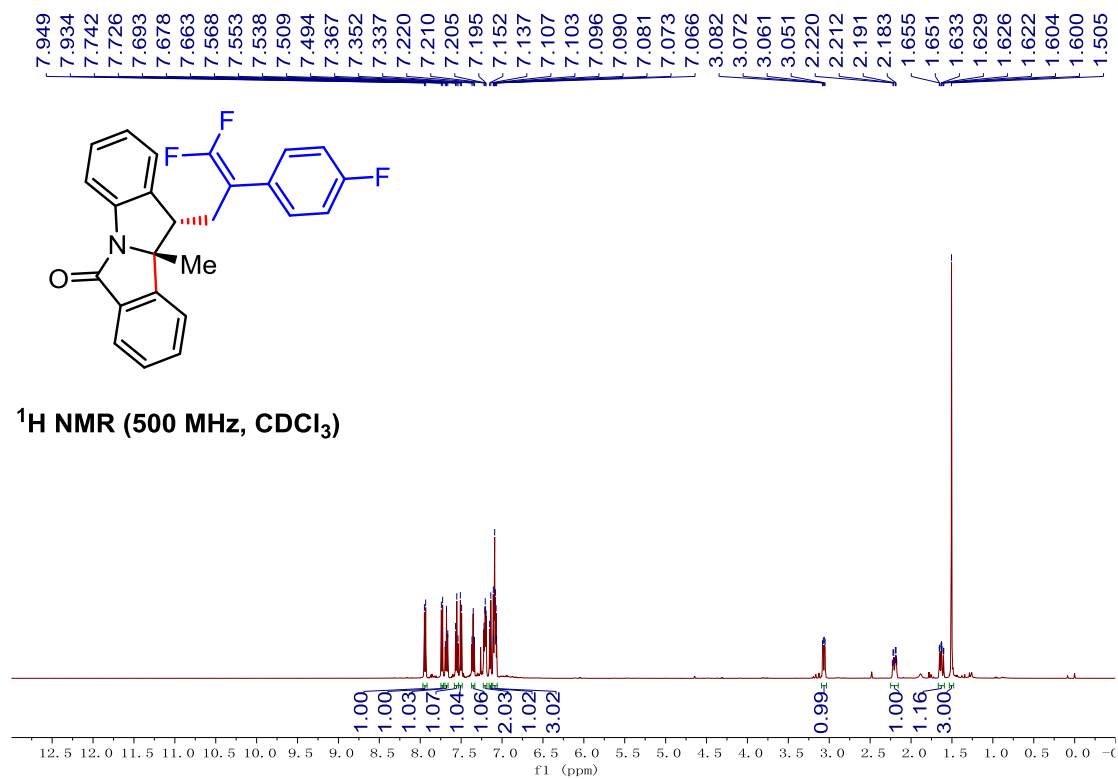

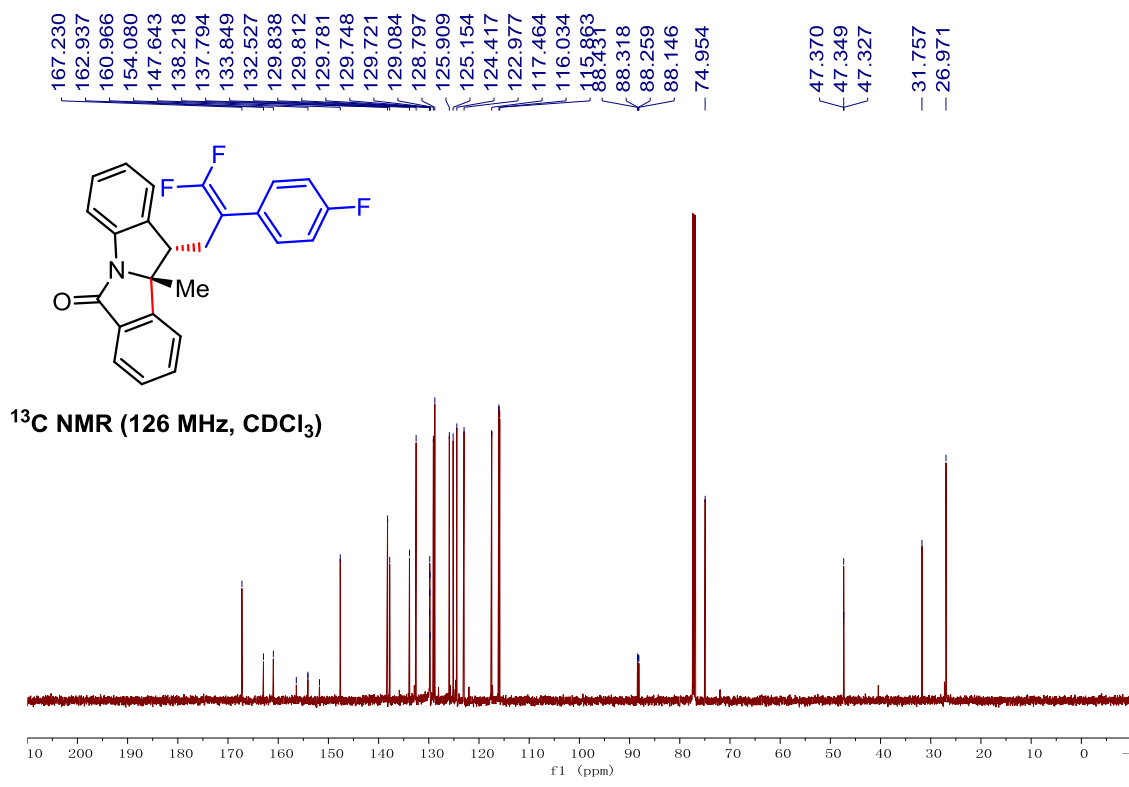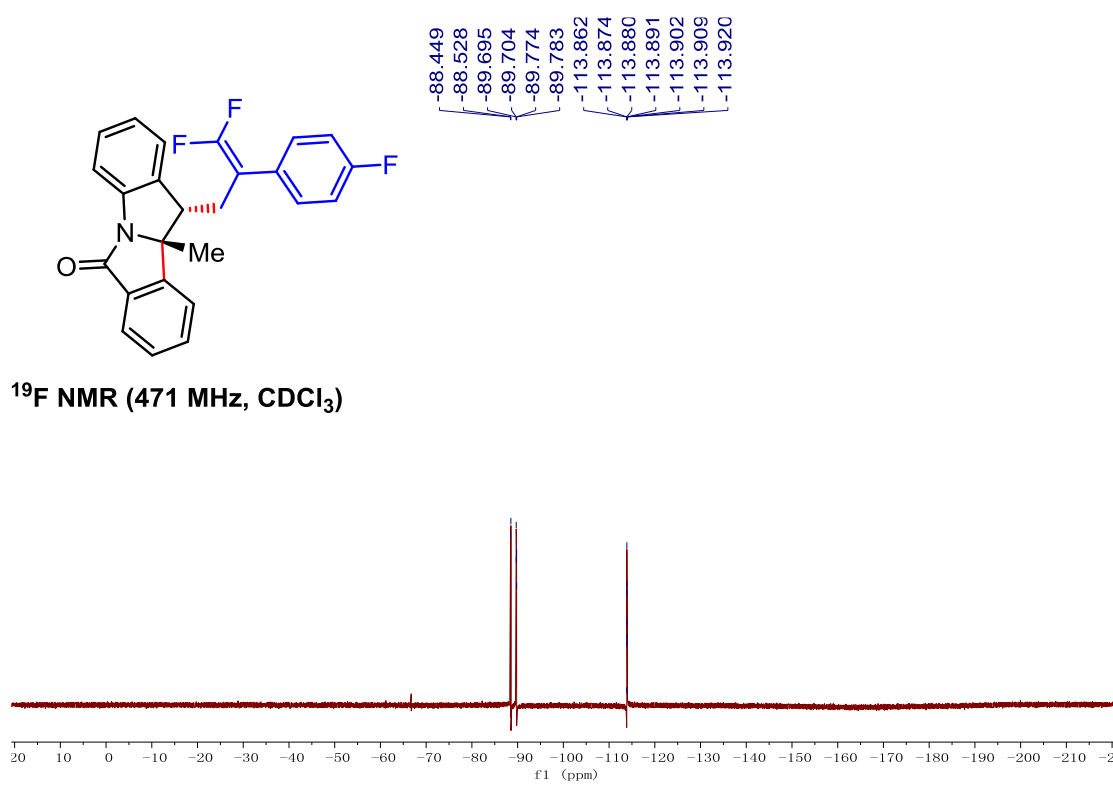

**(10*R*,11*S*)-11-(2-(4-Chlorophenyl)-3,3-difluoroallyl)-10*b*-methyl-10*b*,11-dihydro-6*H*-isoindolo[2,1-*a*]indol-6-one, 19**

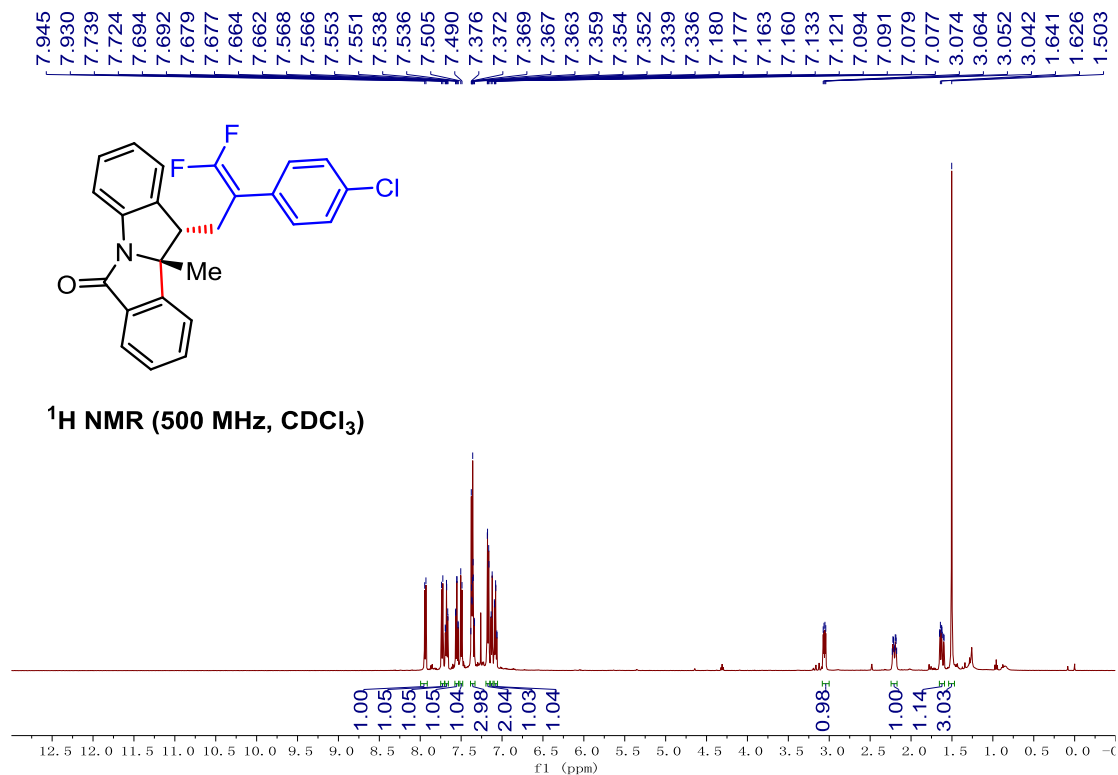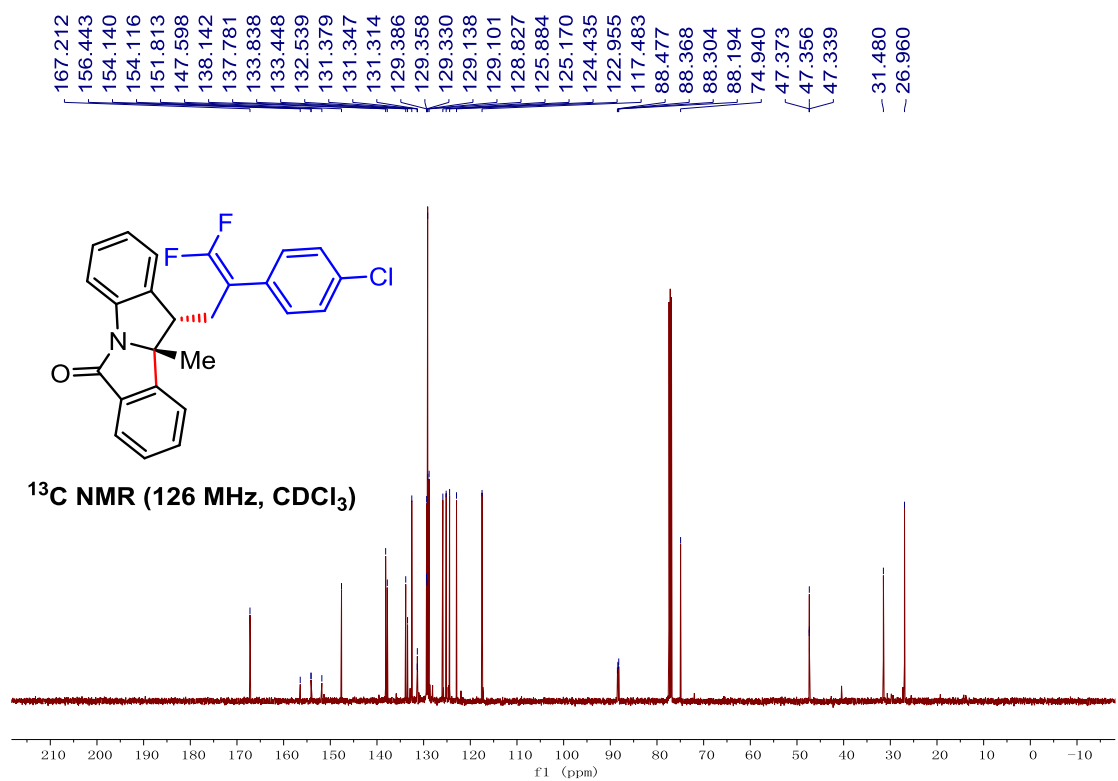

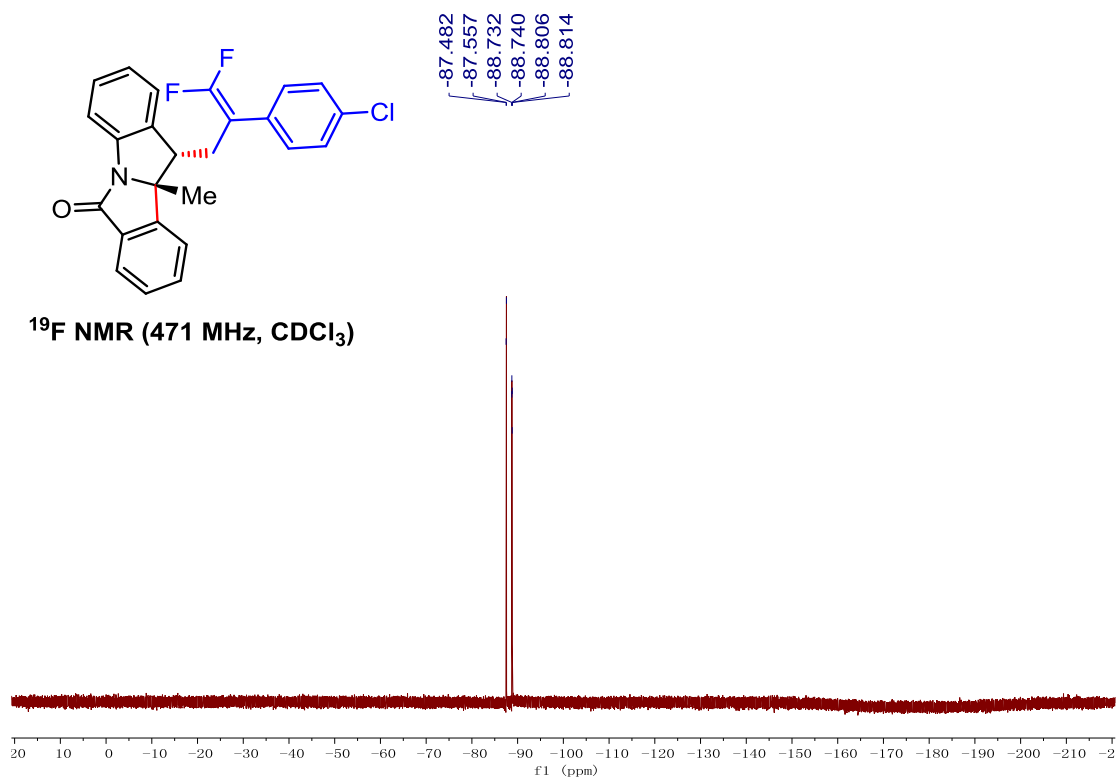

**(10bR,11S)-11-(2-(4-Bromophenyl)-3,3-difluoroallyl)-10b-methyl-10b,11-dihydro-6H-isoindolo[2,1-a]indol-6-one, 20**

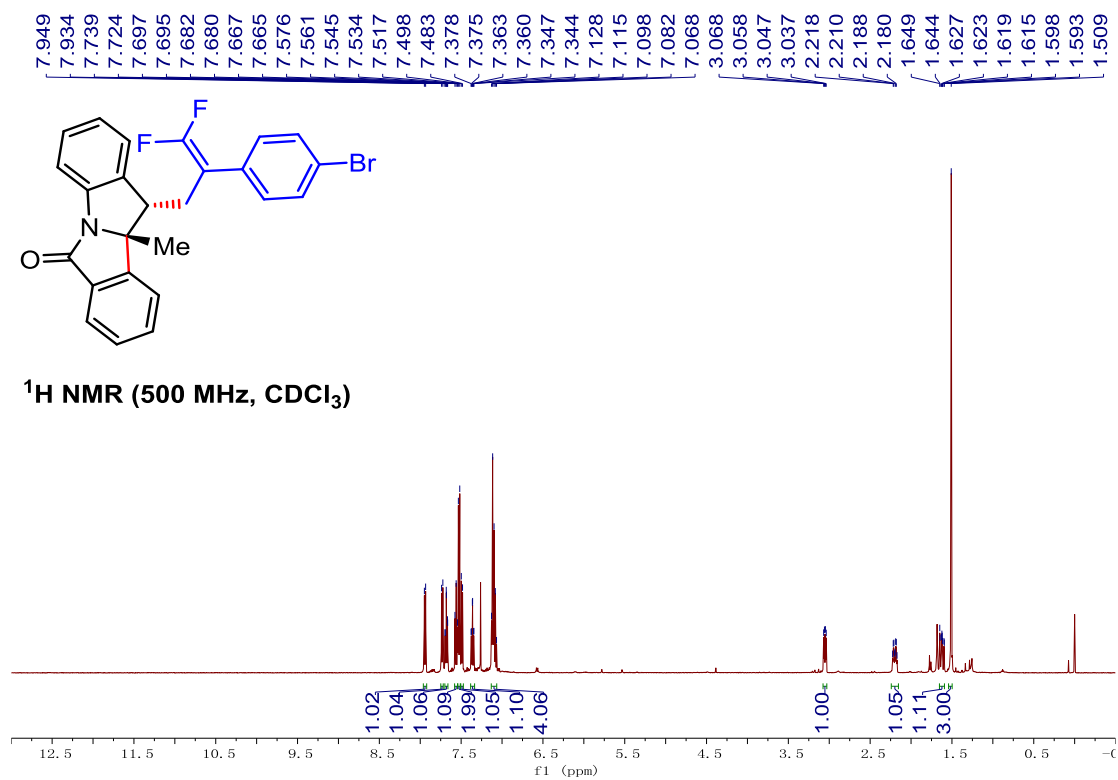

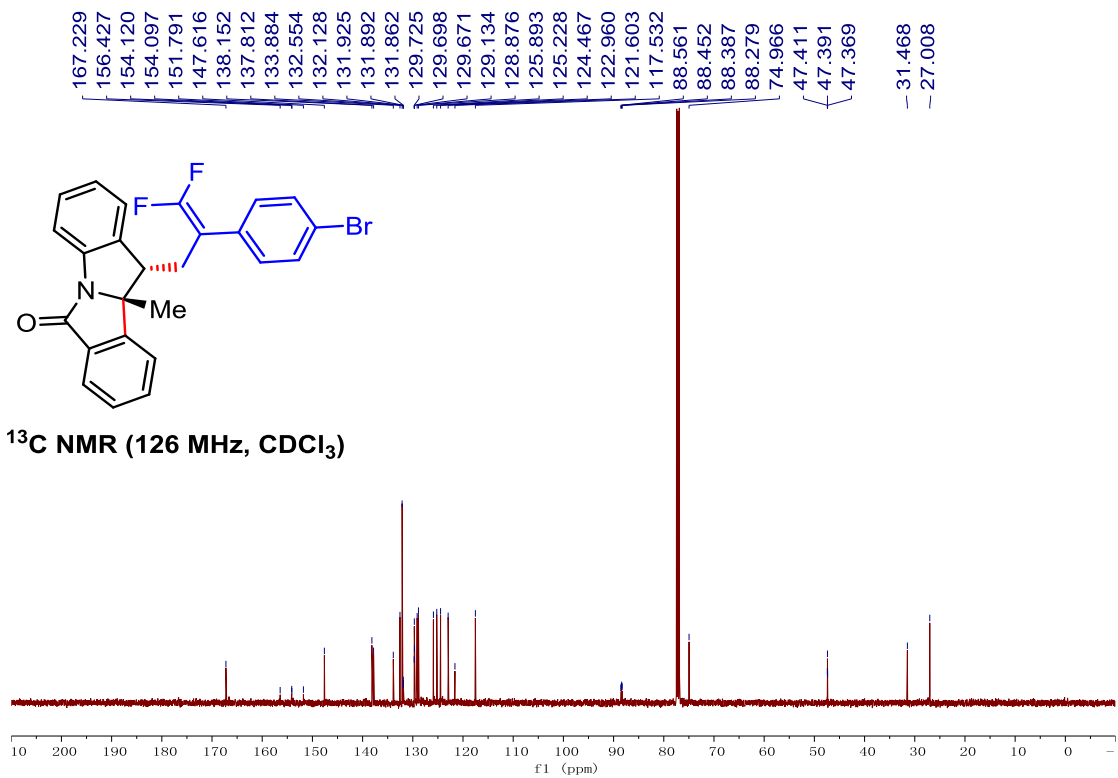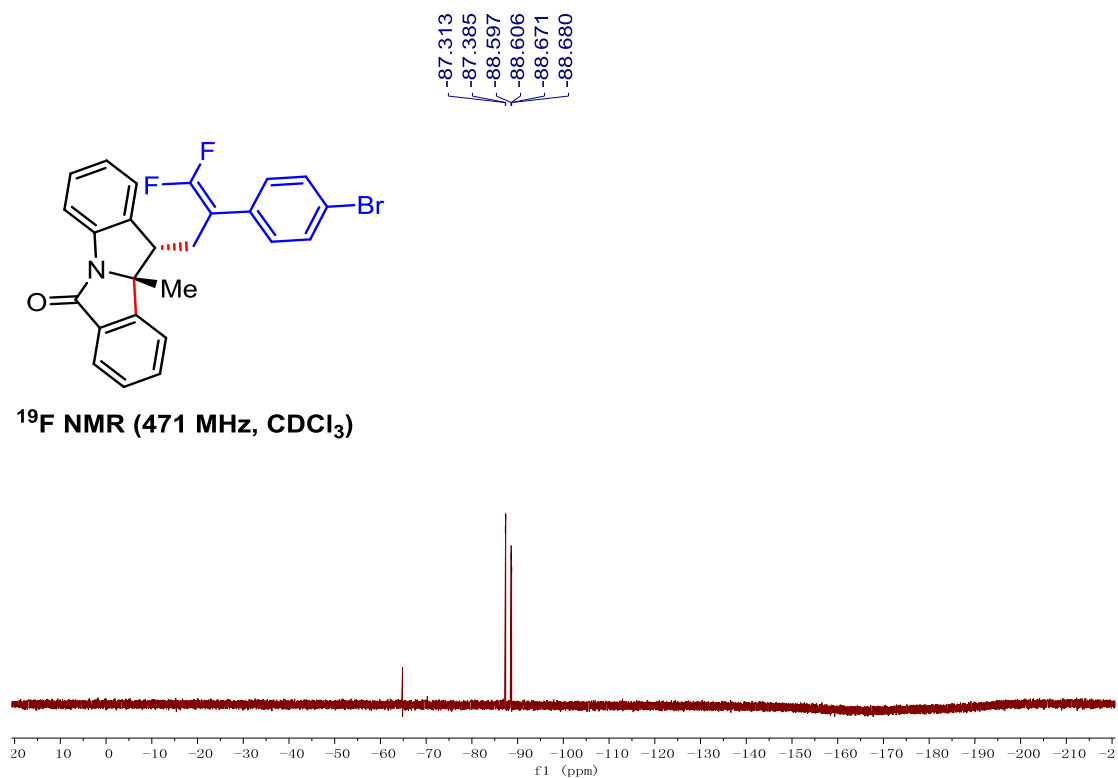



**(10*R*,11*S*)-11-(2-(4-Acetylphenyl)-3,3-difluoroallyl)-10*b*-methyl-10*b*,11-dihydro-6*H*-isoindolo[2,1-*a*]indol-6-one, 21**

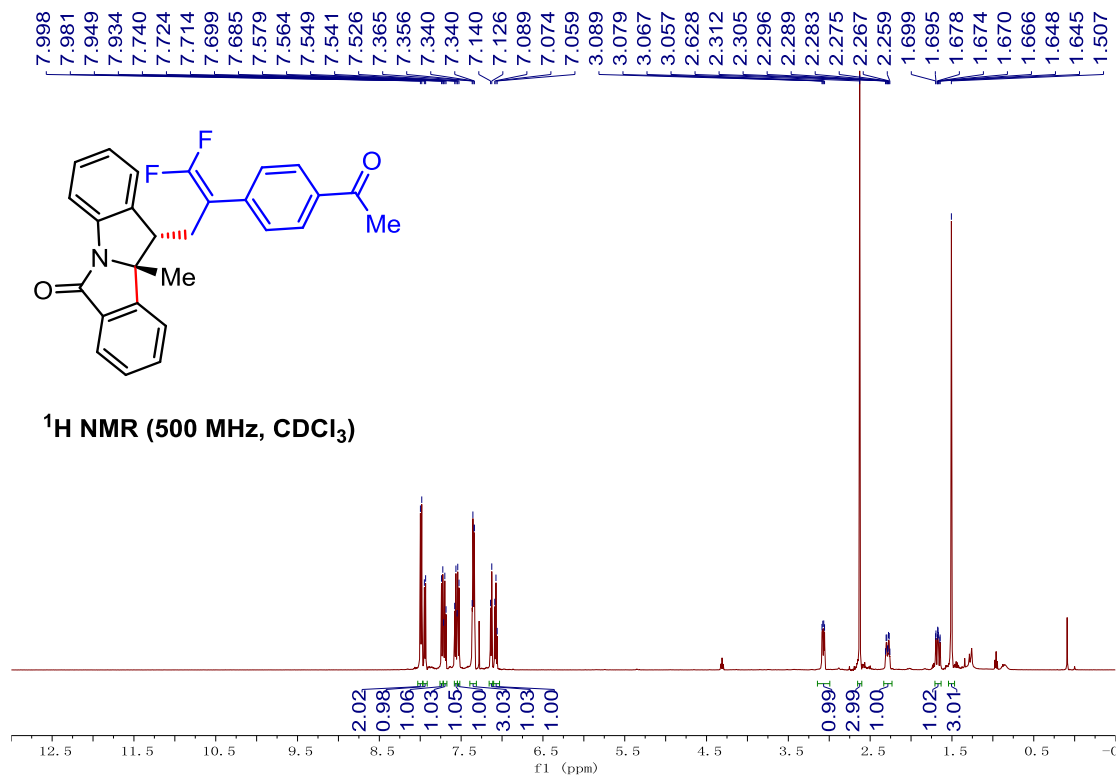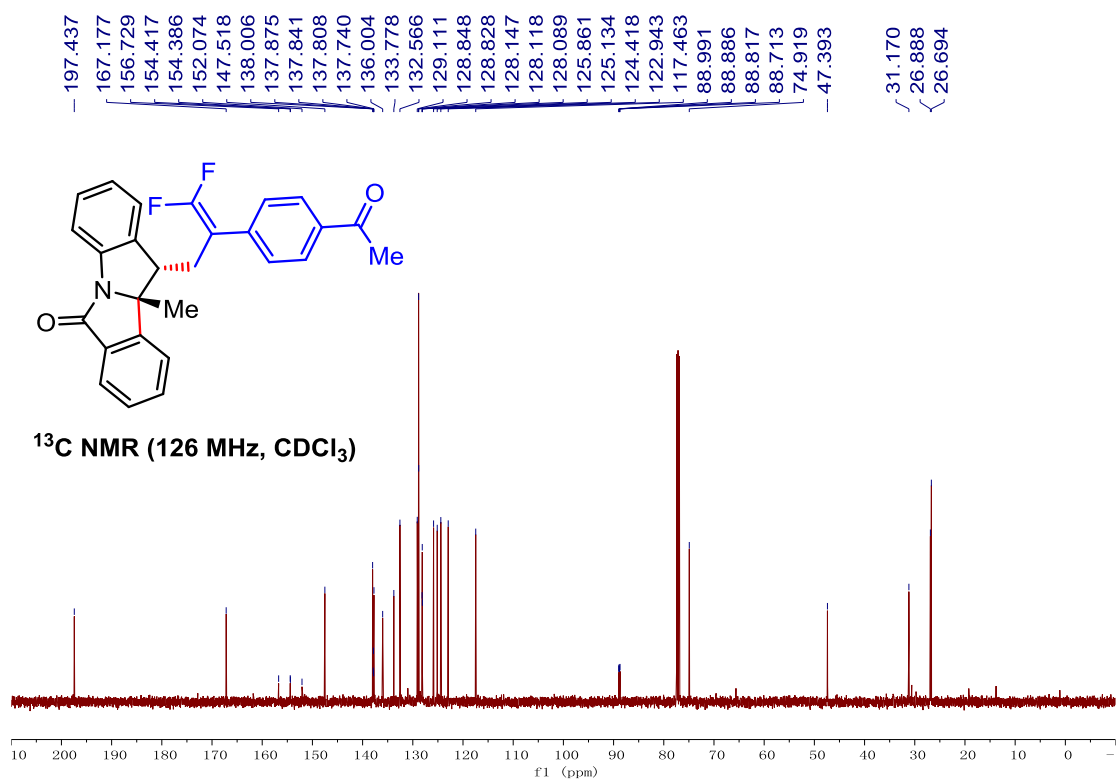

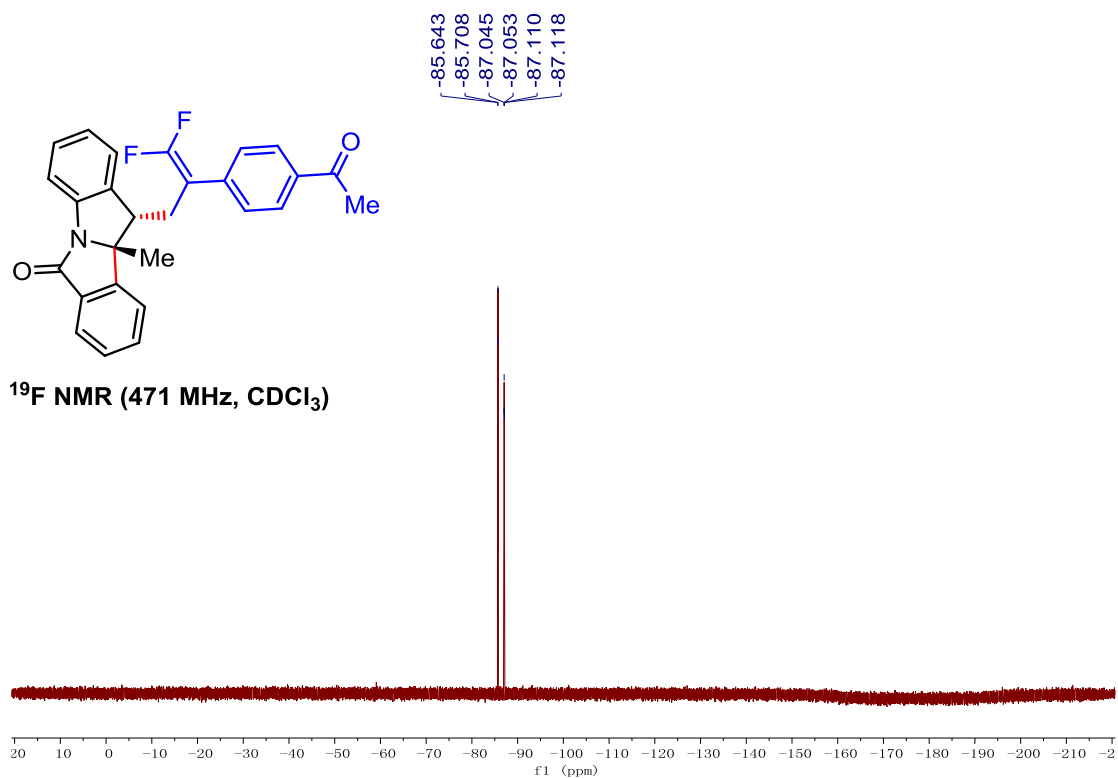

**4-(1,1-Difluoro-3-((10*bR*,11*S*)-10*b*-methyl-6-oxo-10*b*,11-dihydro-6*H*-isoindolo[2,1-*a*]indol-11-yl)prop-1-en-2-yl)benzotrifluoride, 22**

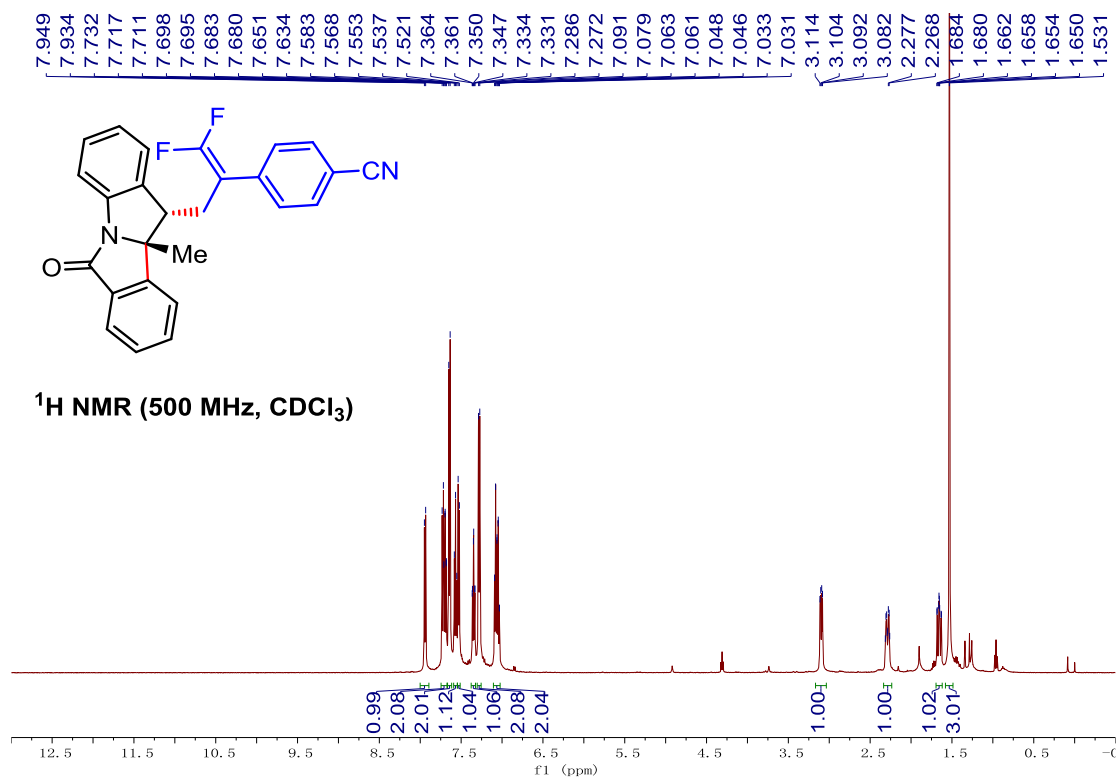

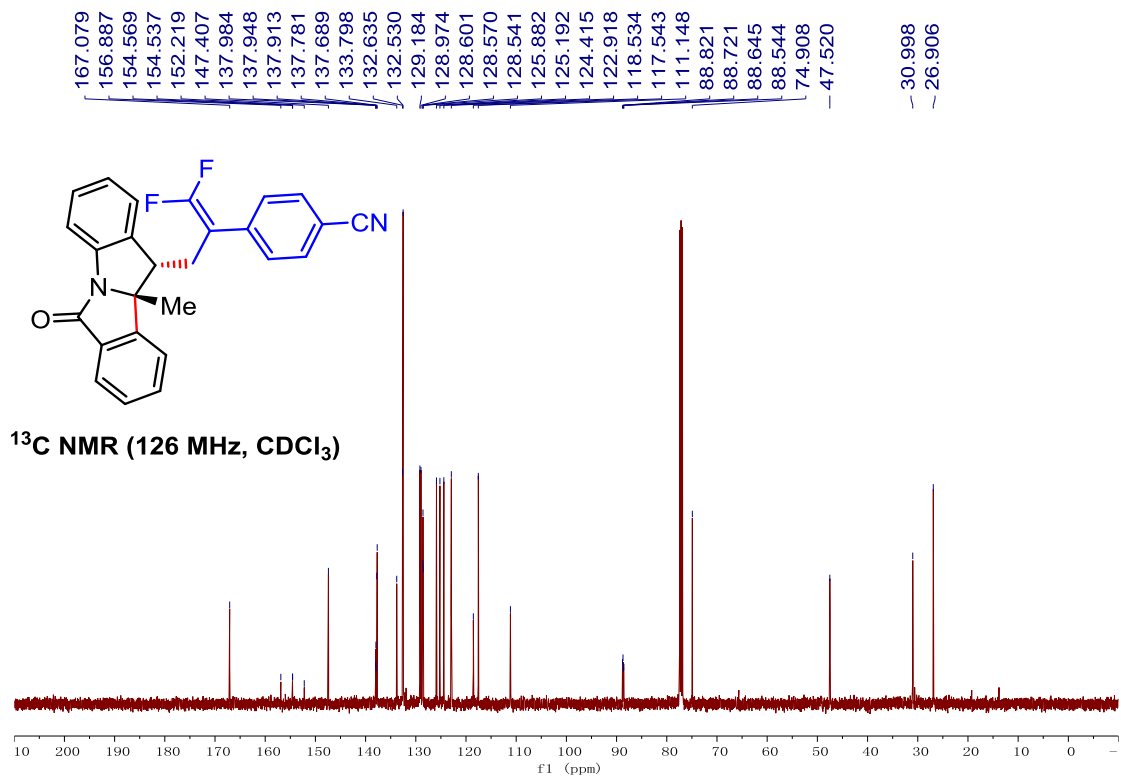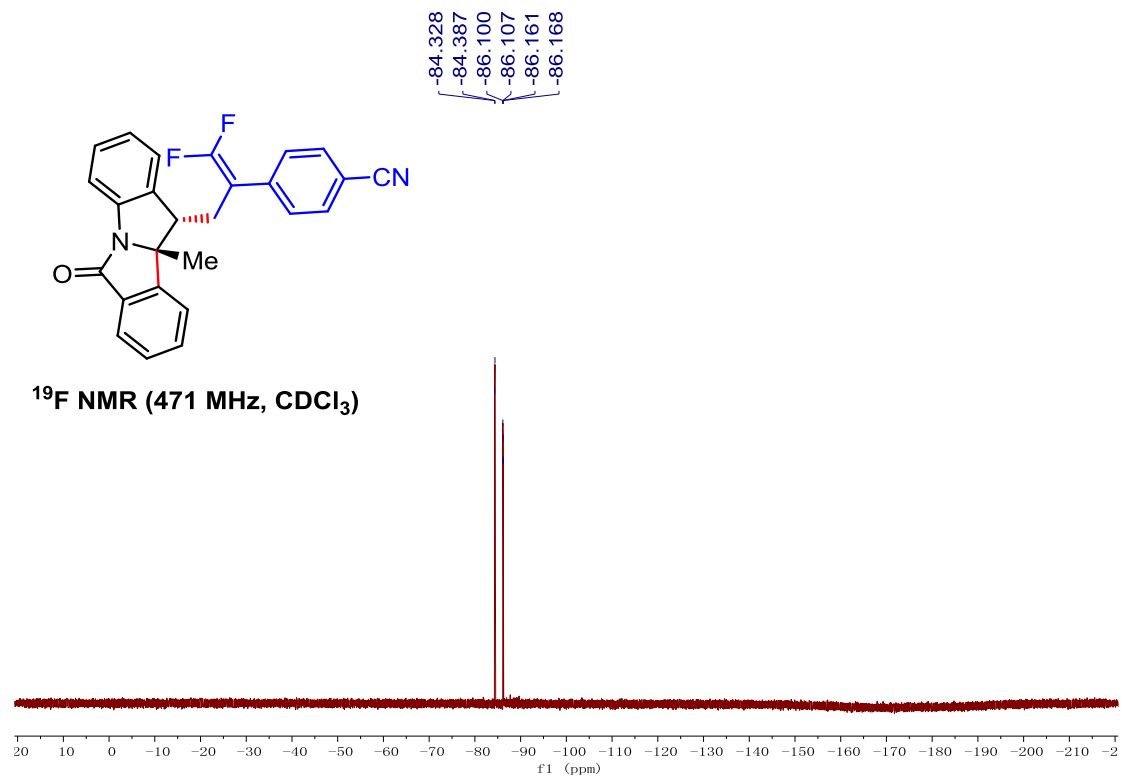

**4-(1,1-Difluoro-3-((10*bR*,11*S*)-10*b*-methyl-6-oxo-10*b*,11-dihydro-6*H*-isoindolo[2,1-*a*]indol-11-yl)prop-1-en-2-yl)benzaldehyde, 23**

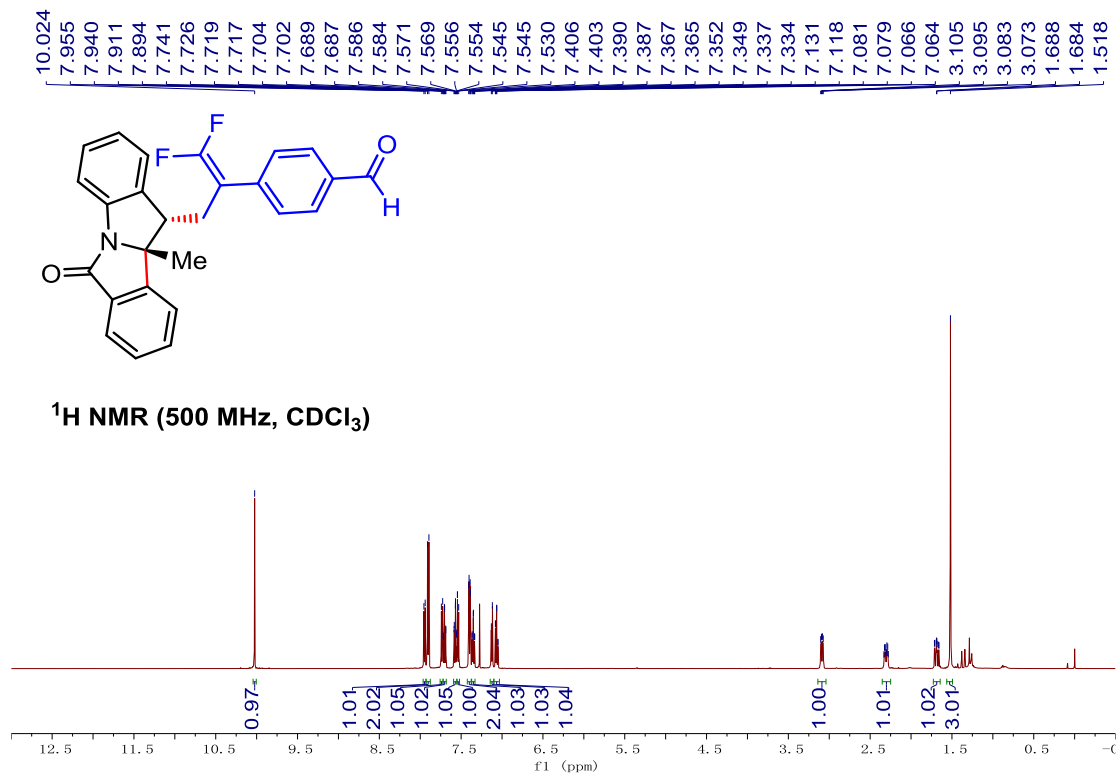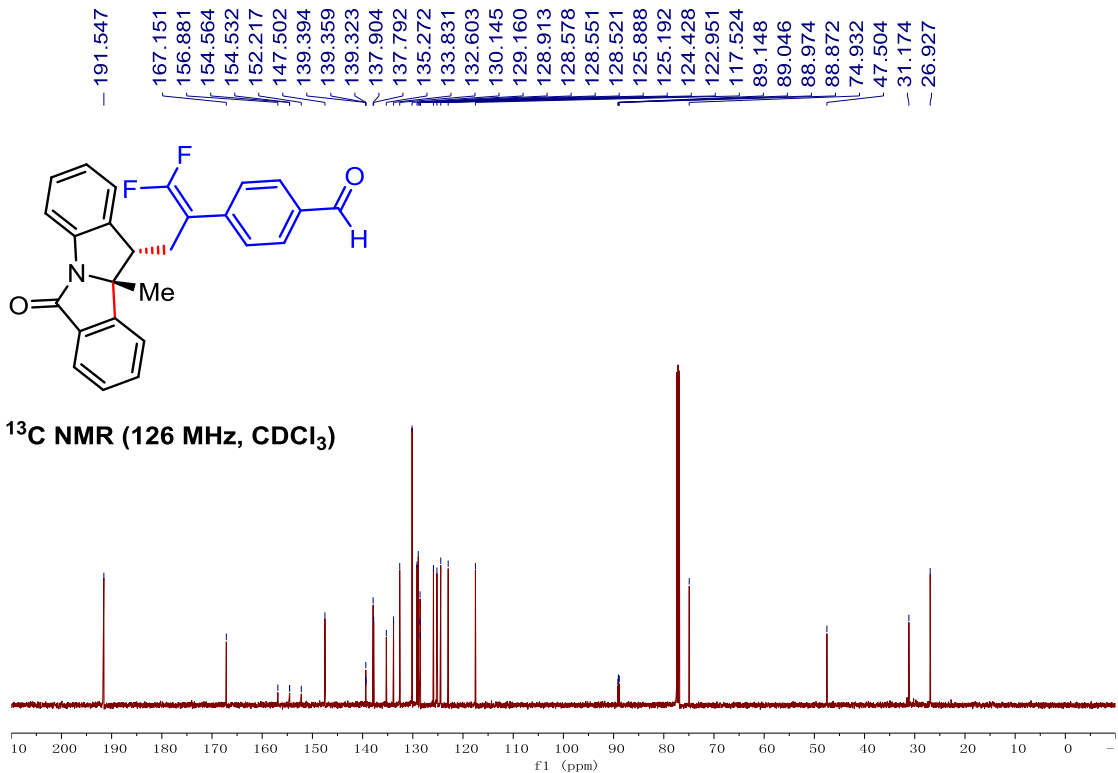

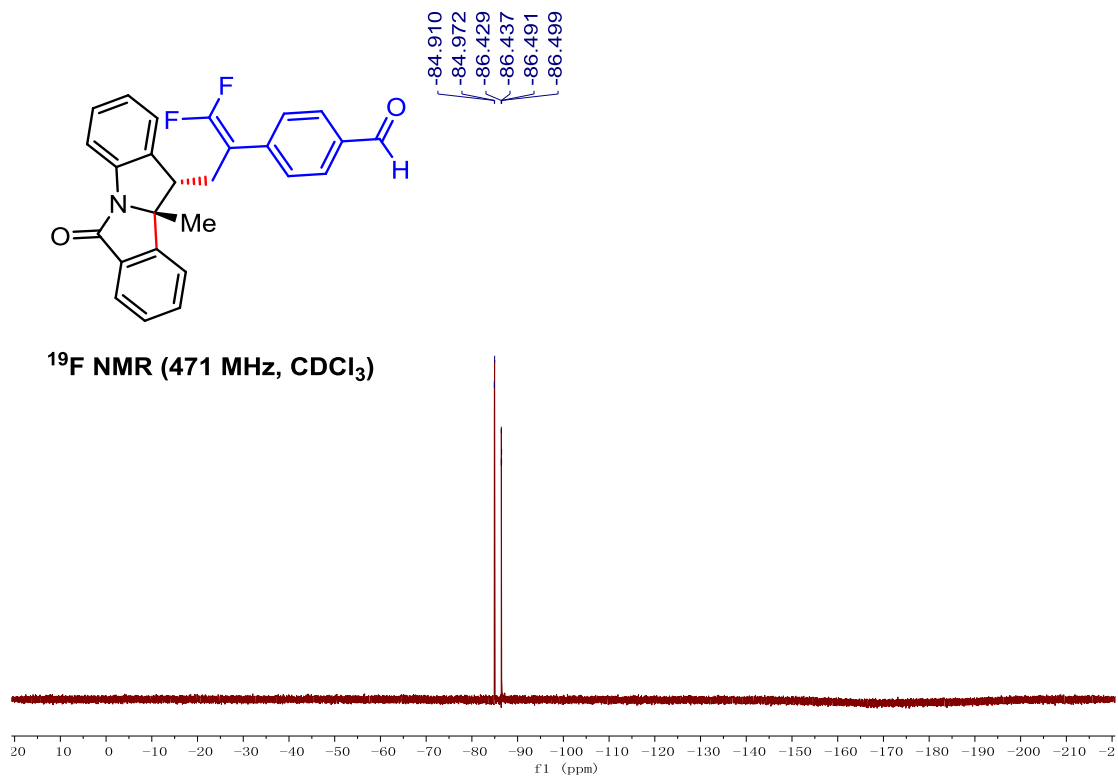

(10*R*,11*S*)-11-(3,3-Difluoro-2-(2-fluorophenyl)allyl)-10*b*-methyl-10*b*,11-dihydro-6*H*-isoindolo[2,1-*a*]indol-6-one, 24

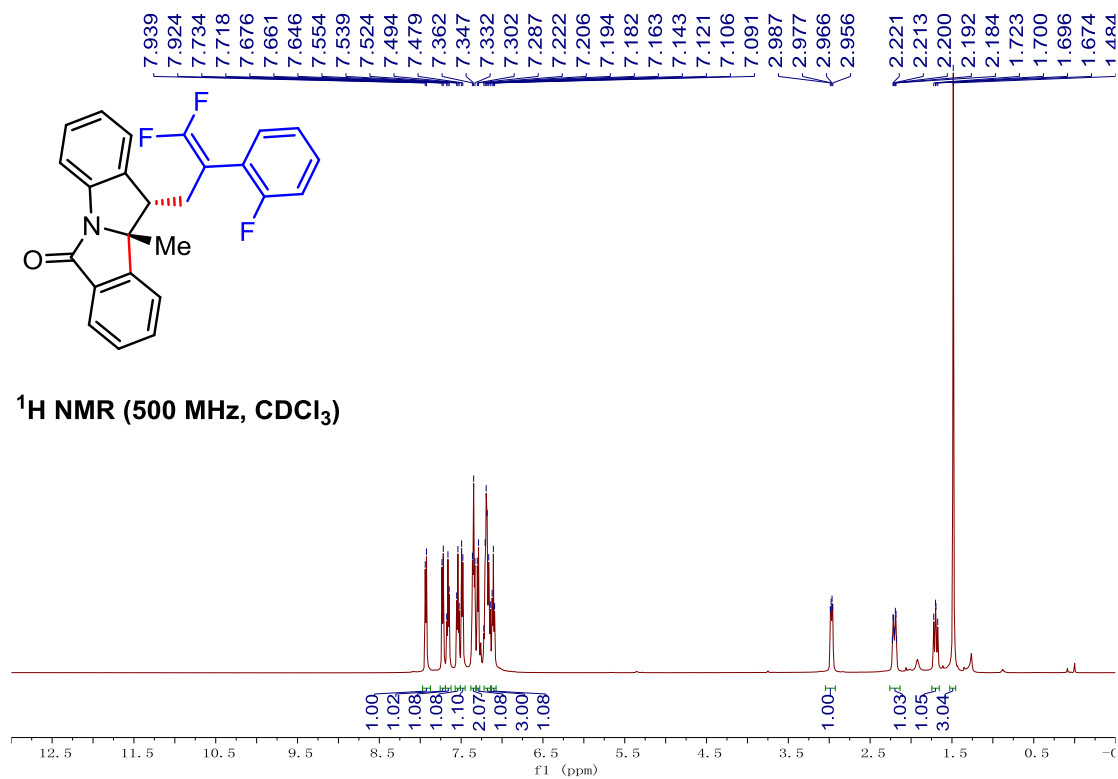

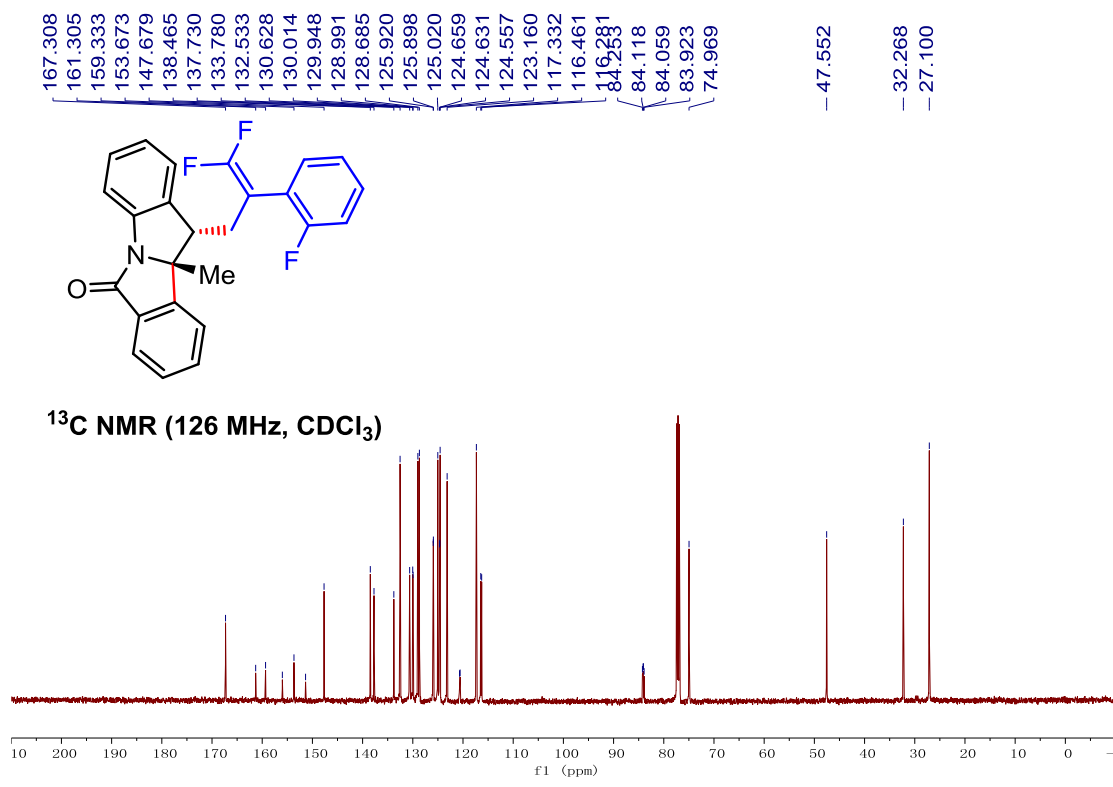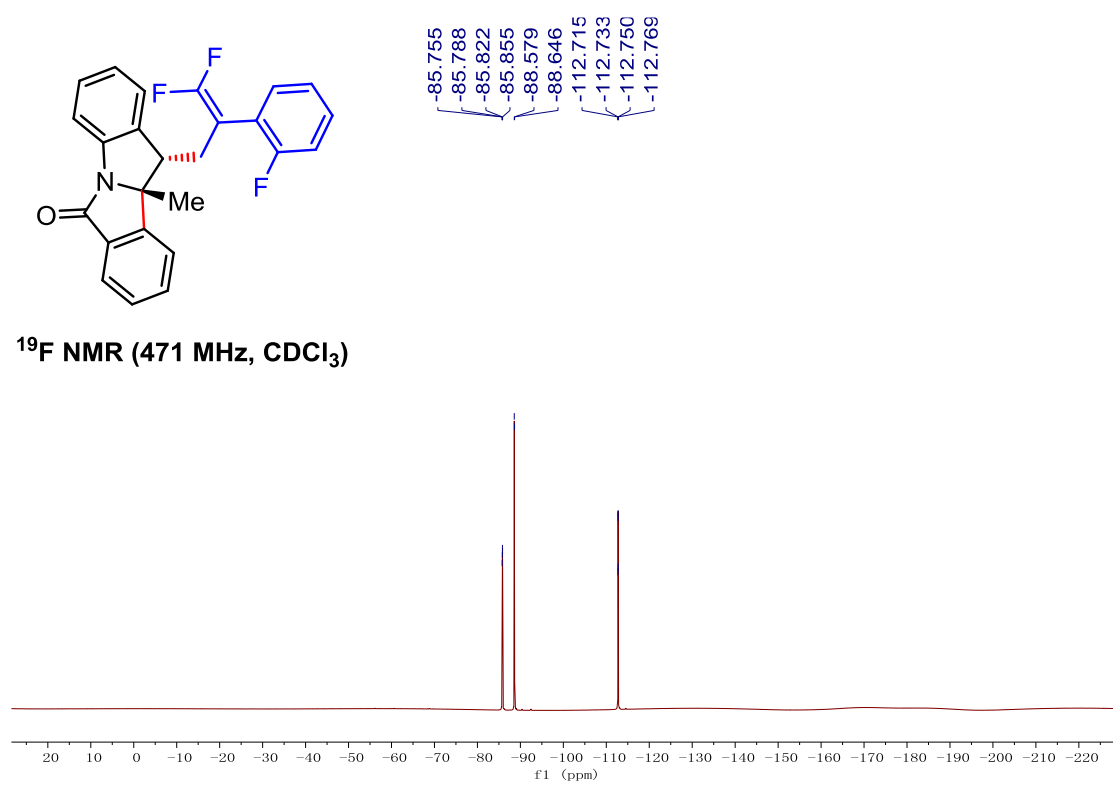

**(10*R*,11*S*)-11-(3,3-Difluoro-2-(thiophen-3-yl)allyl)-10*b*-methyl-10*b*,11-dihydro-6*H*-isoindolo[2,1-*a*]indol-6-one, 25**

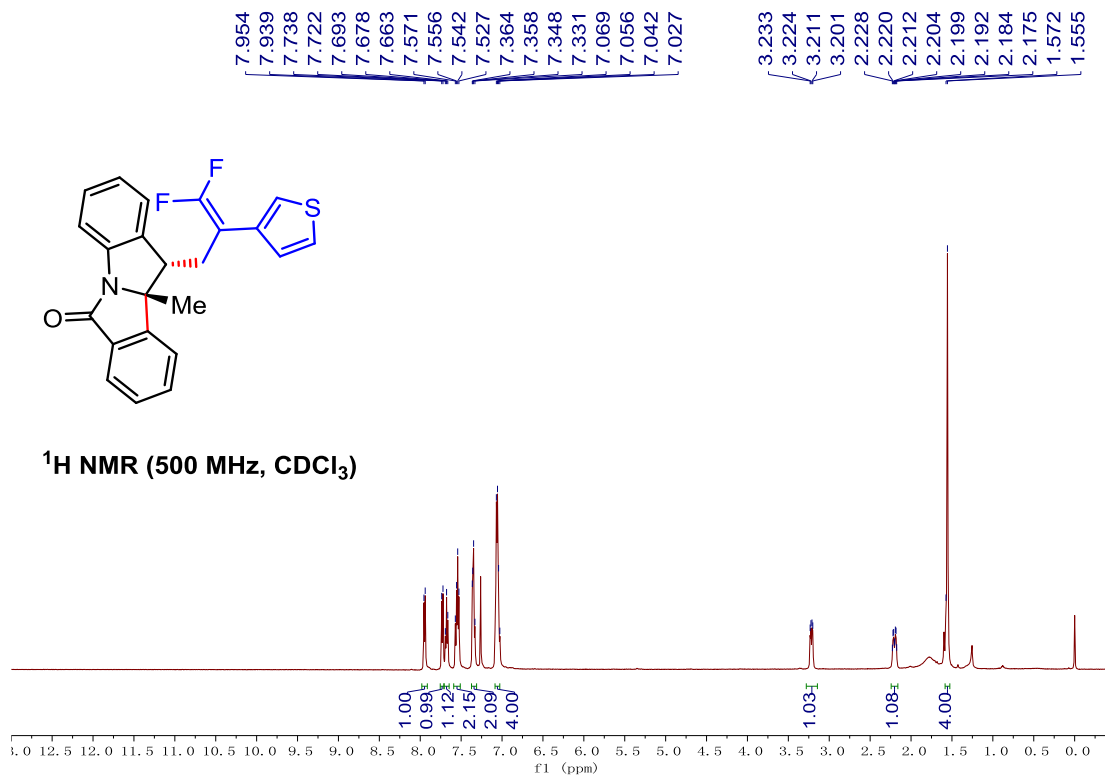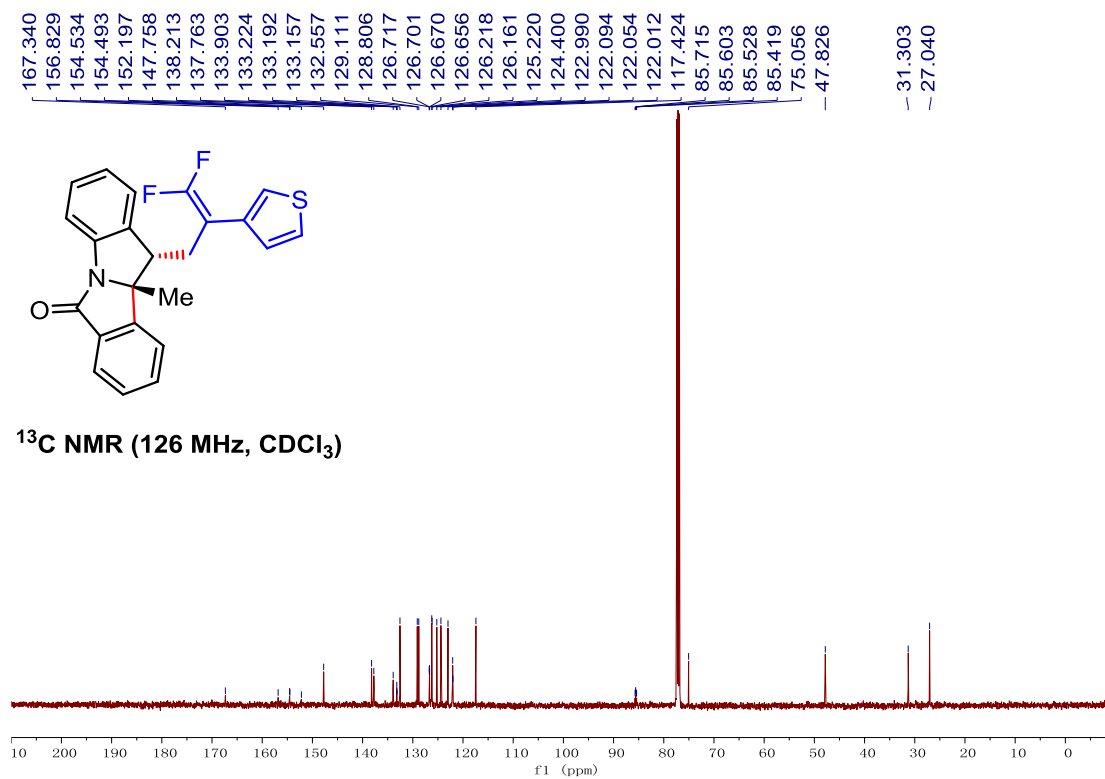

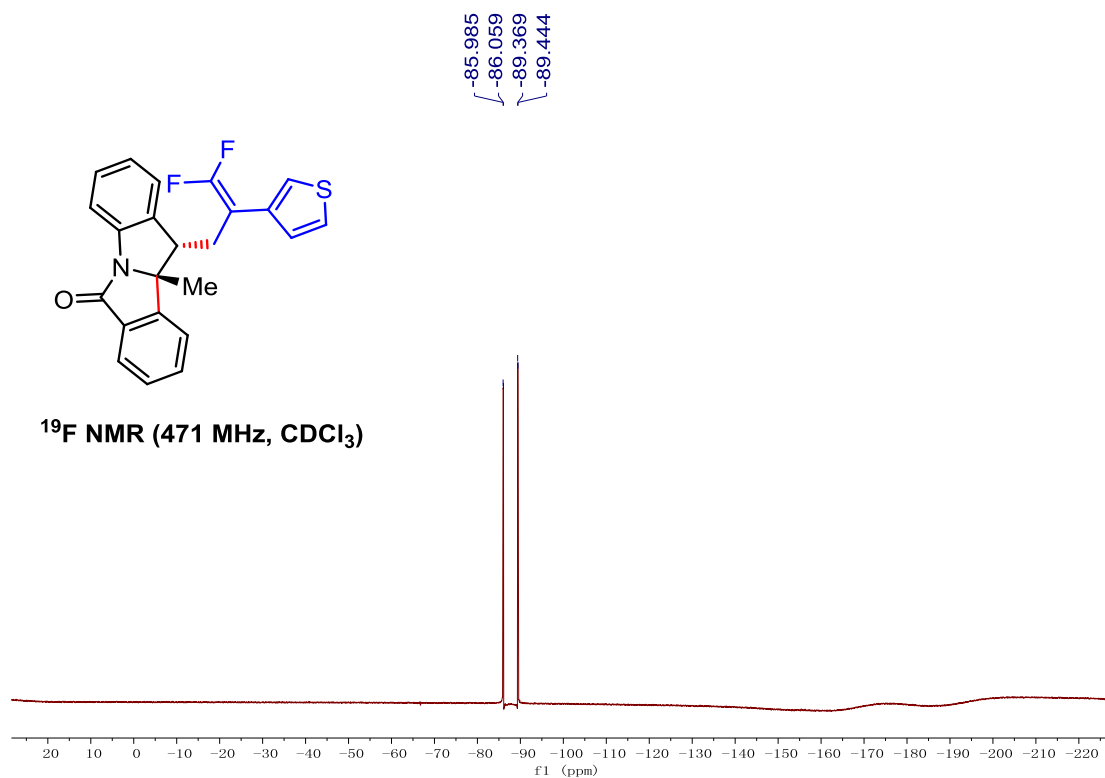

**(10bR,11S)-11-(3,3-Difluoro-2-(quinolin-3-yl)allyl)-10b-methyl-10b,11-dihydro-6H-isoindolo[2,1-a]indol-6-one, 26**

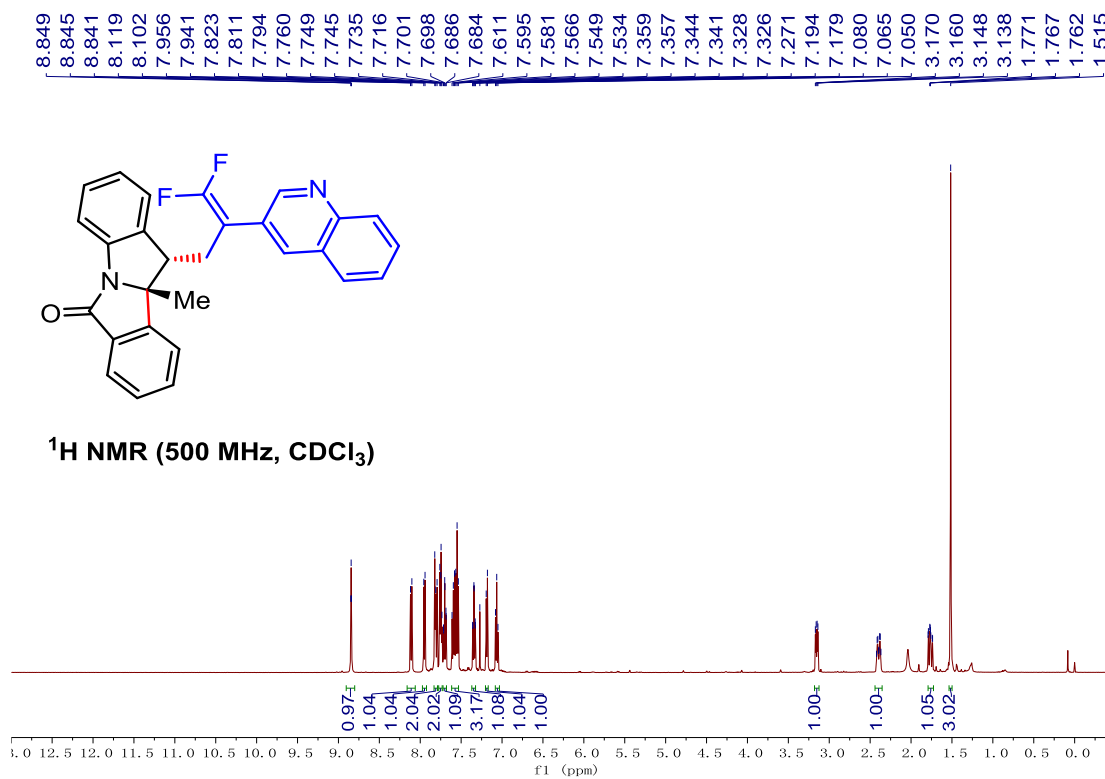



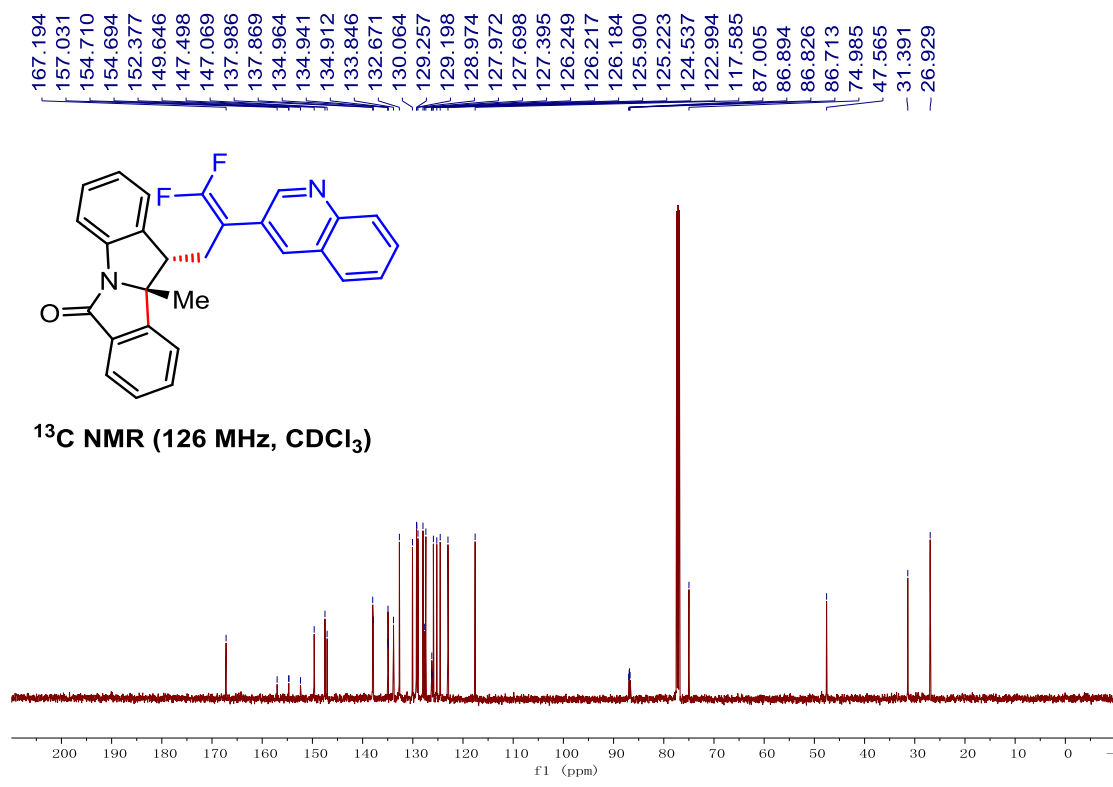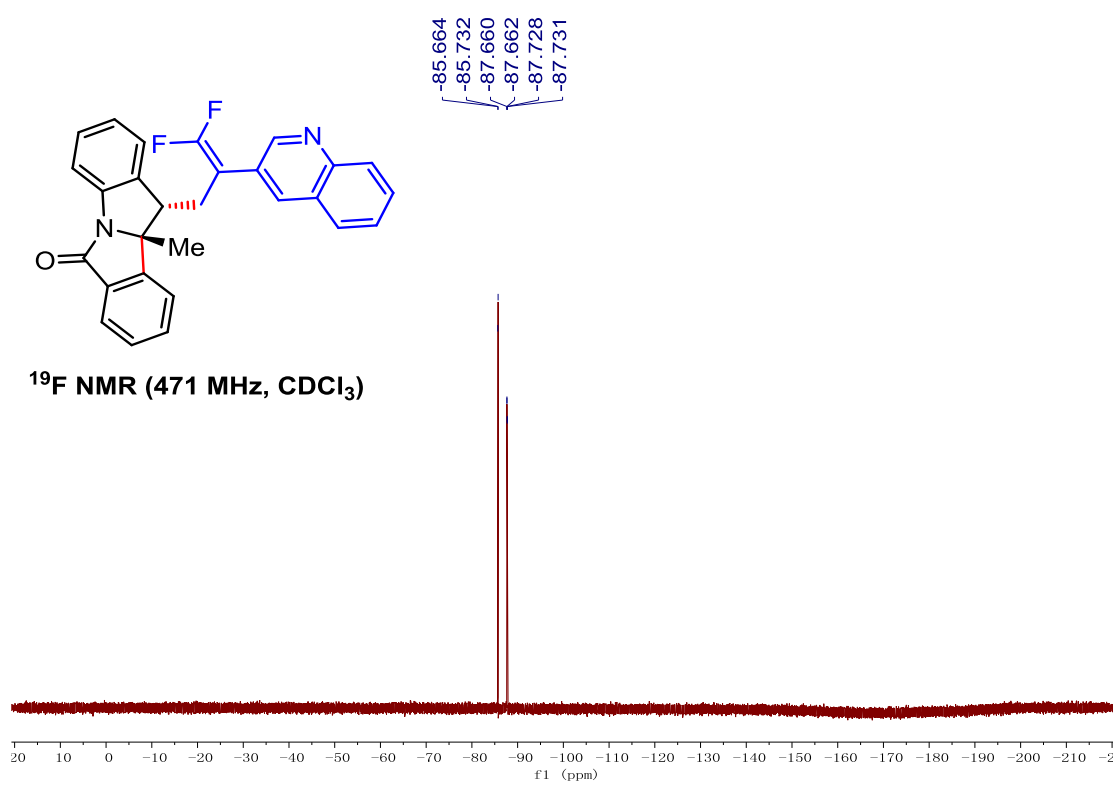

**(10*b*R,11*S*)-11-(2-(Dibenzo[*b,d*]furan-4-yl)-3,3-difluoroallyl)-10*b*-methyl-10*b*,11-dihydro-6*H*-isoindolo[2,1-*a*]indol-6-one, 27**

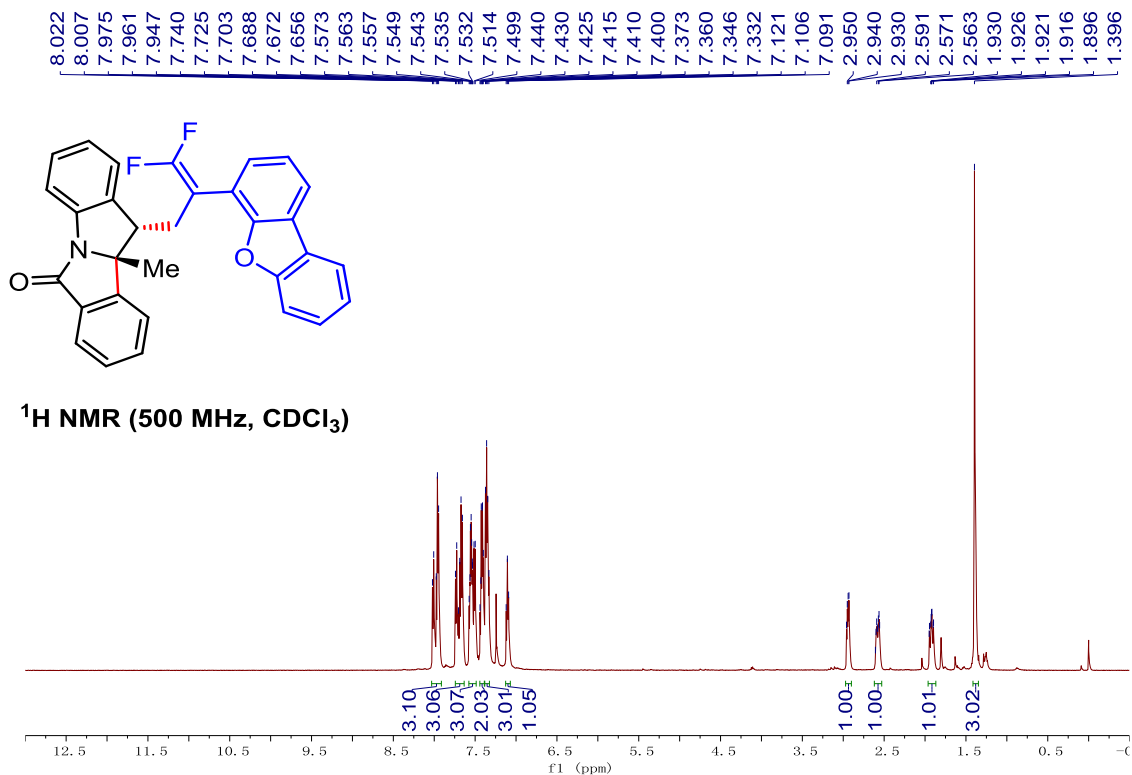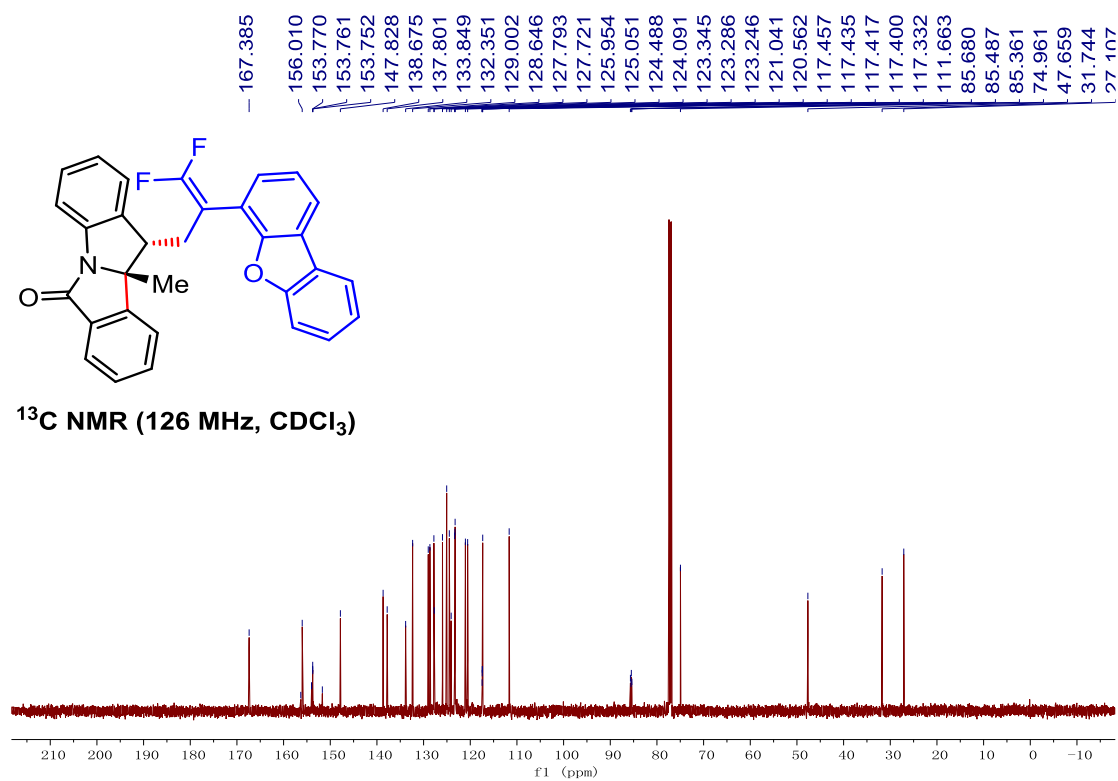

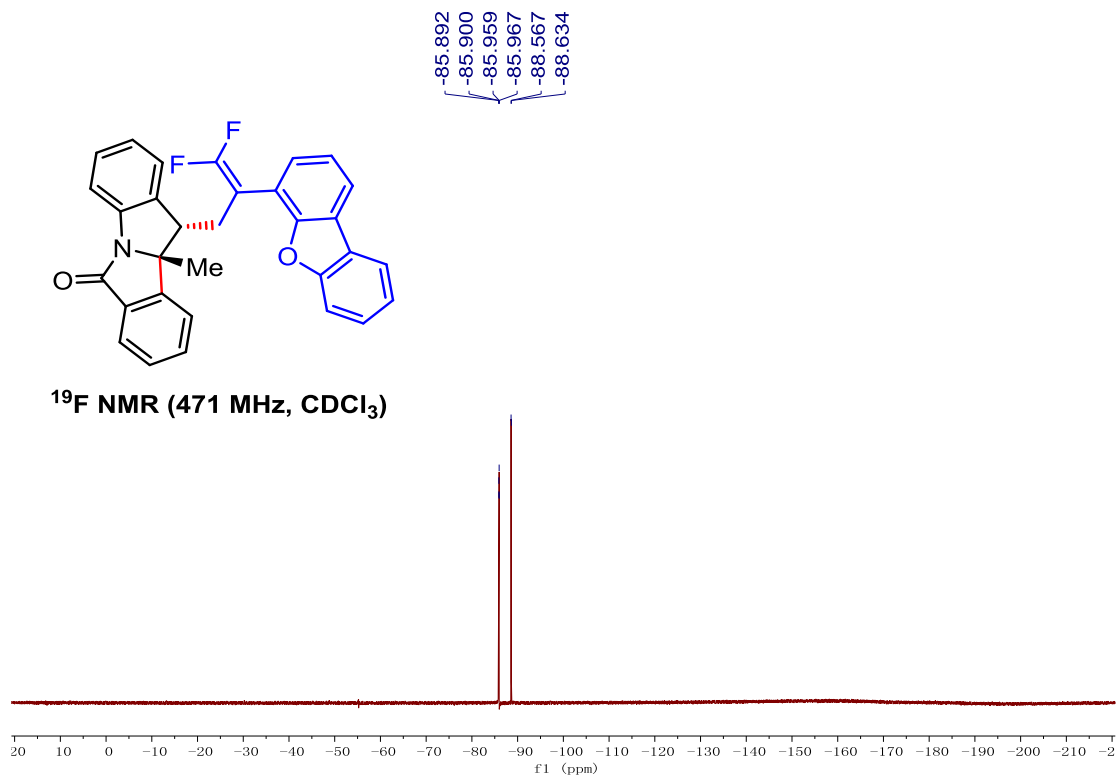

(10*bR*,11*S*)-11-(3,3-Difluoro-2-(*p*-tolyl)allyl)-10,10*b*-dimethyl-10*b*,11-dihydro-6*H*-isoindolo[2,1-*a*]indol-6-one, 28

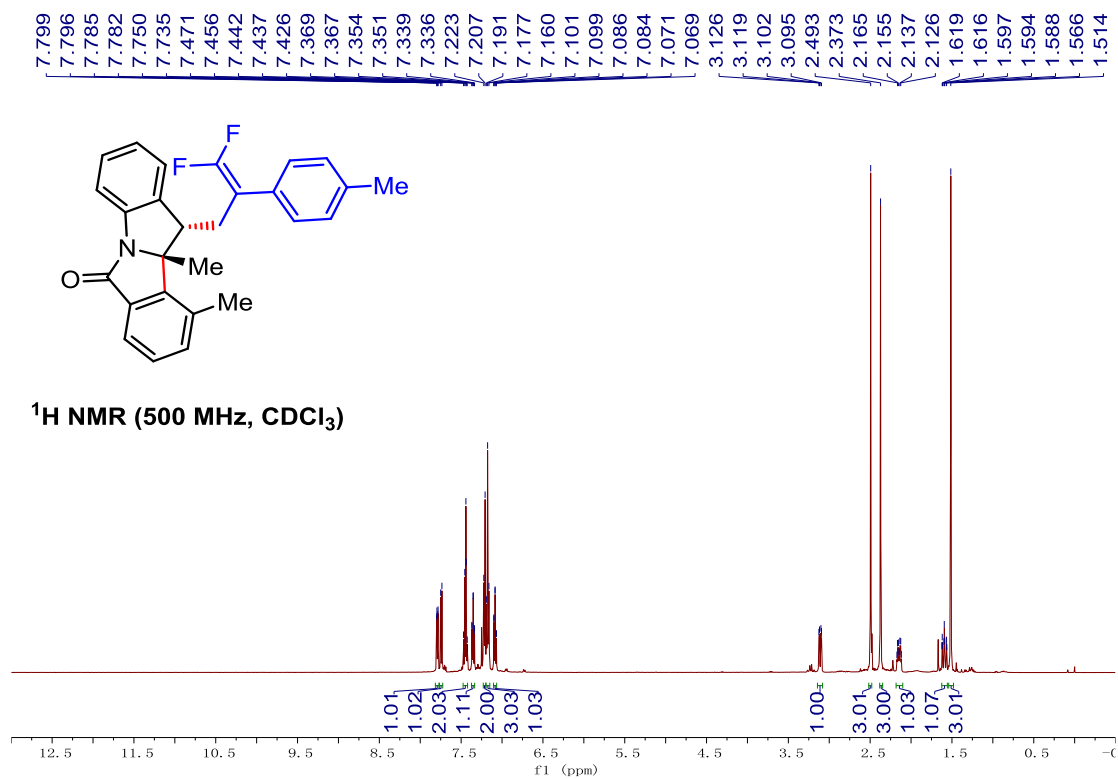

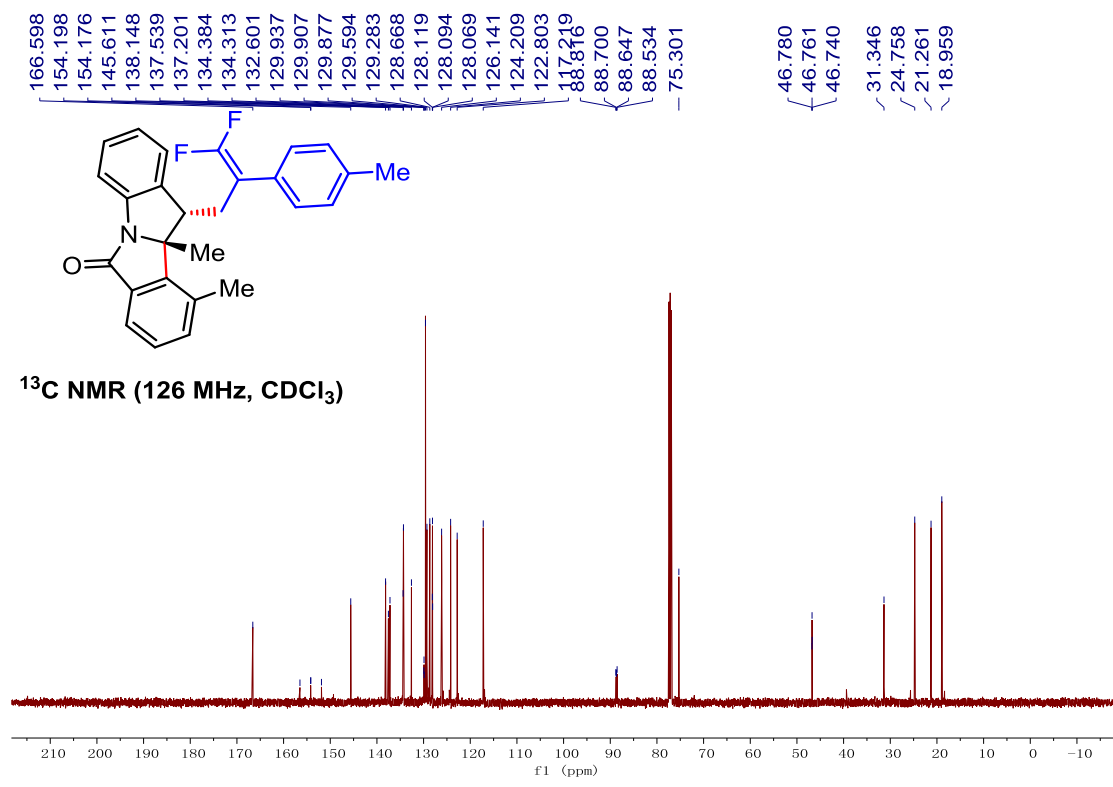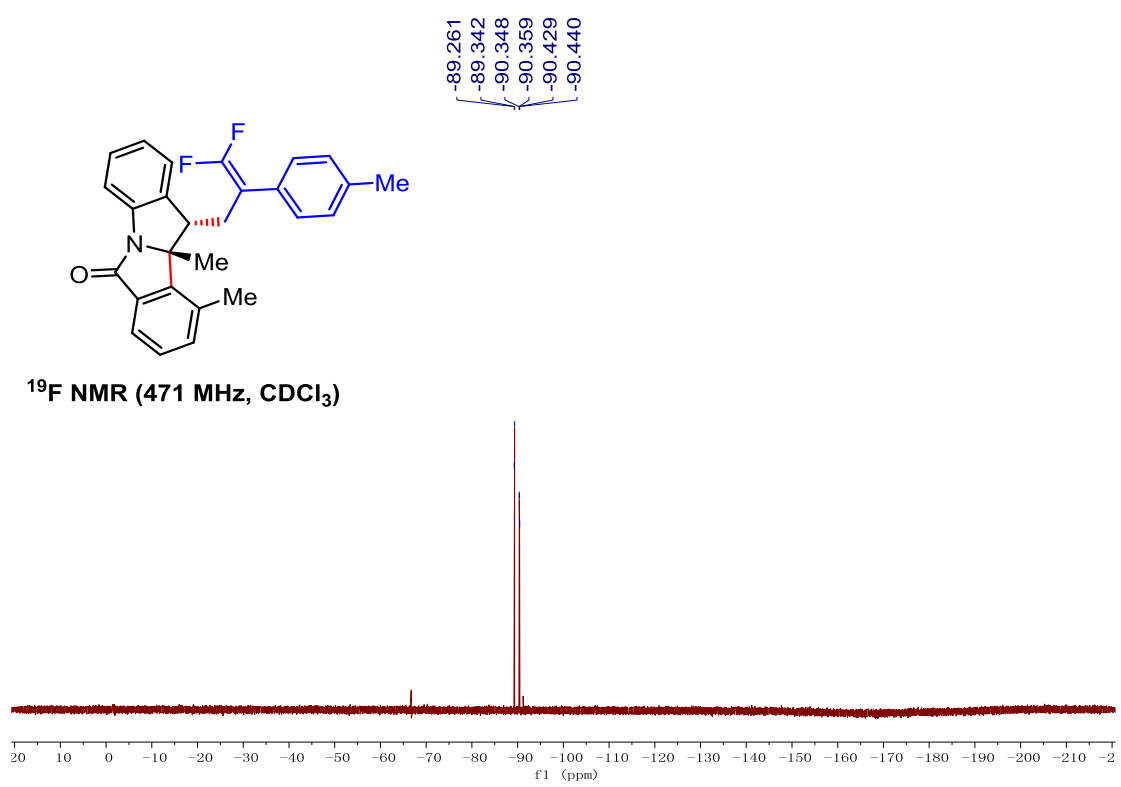

**(10*R*,11*S*)-11-(3,3-Difluoro-2-(*p*-tolyl)allyl)-9,10b-dimethyl-10b,11-dihydro-6*H*-isoindolo[2,1-*a*]indol-6-one, 29**

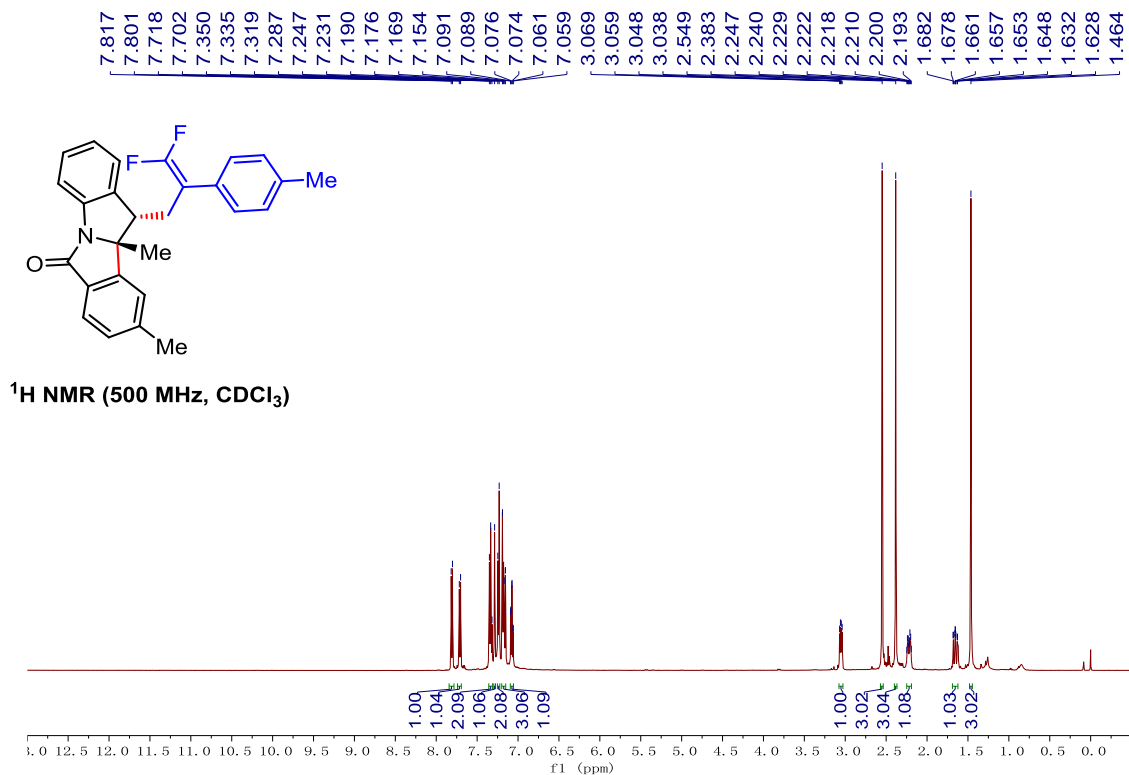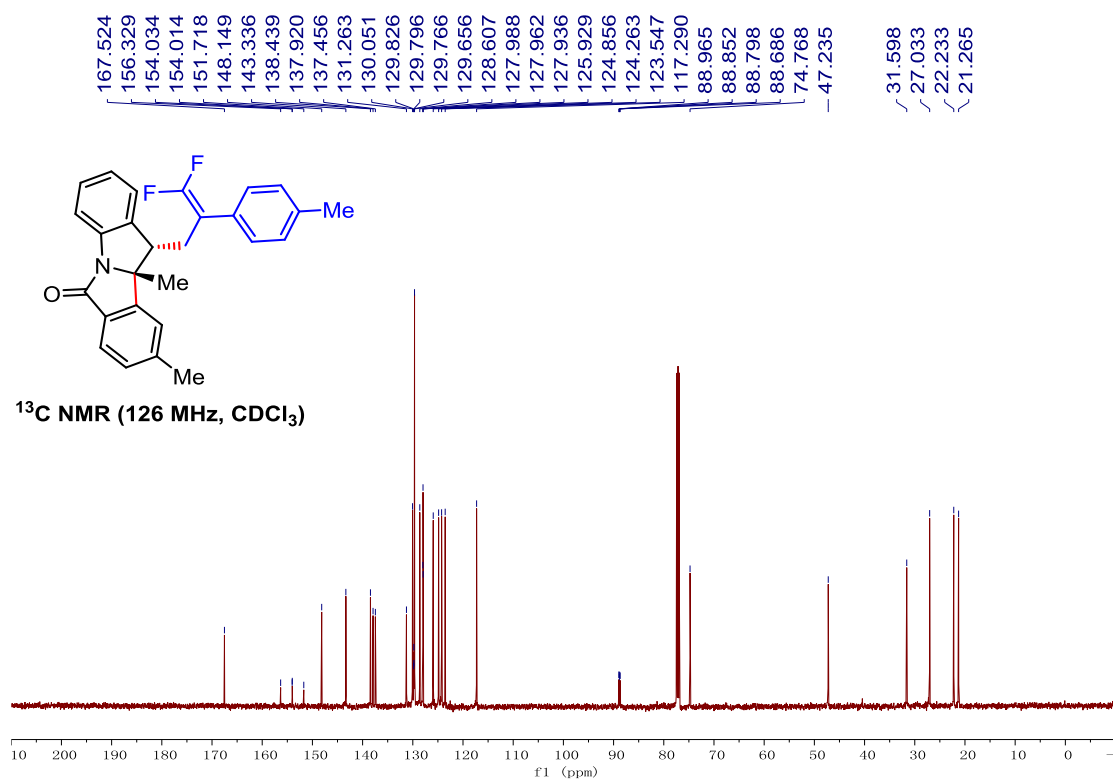

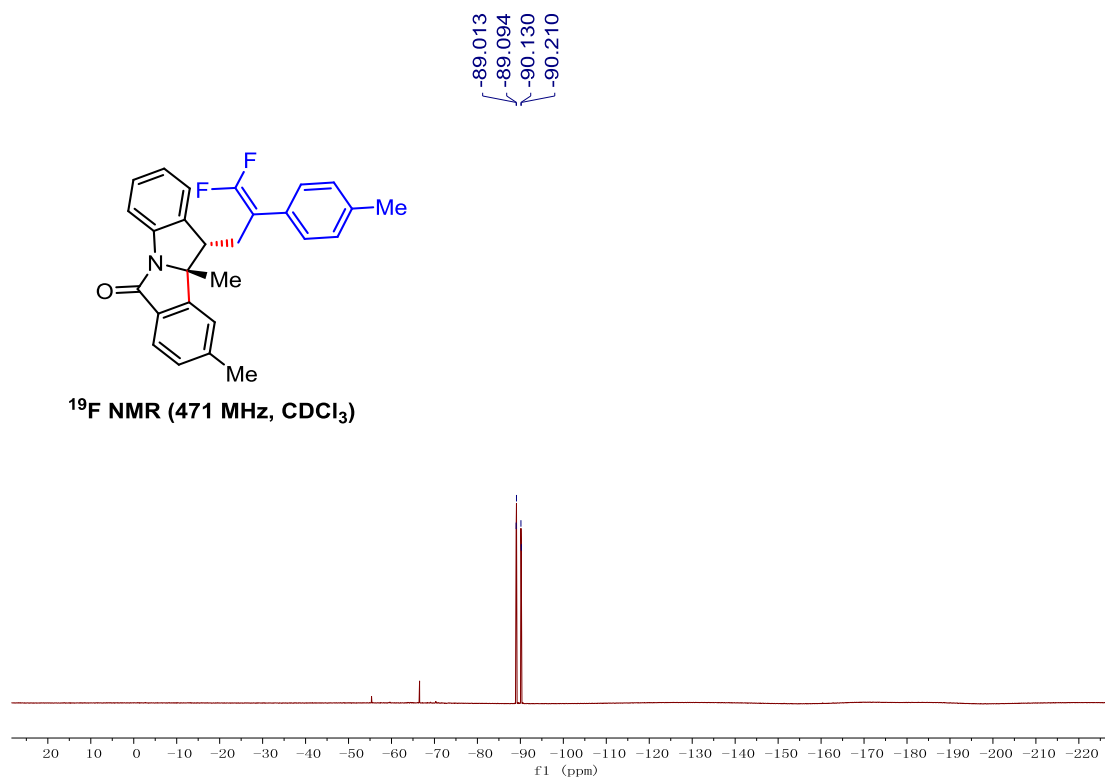

**(10bR,11S)-11-(3,3-Difluoro-2-(*p*-tolyl)allyl)-8,10b-dimethyl-10b,11-dihydro-6H-isoindolo[2,1-*a*]indol-6-one, 30**

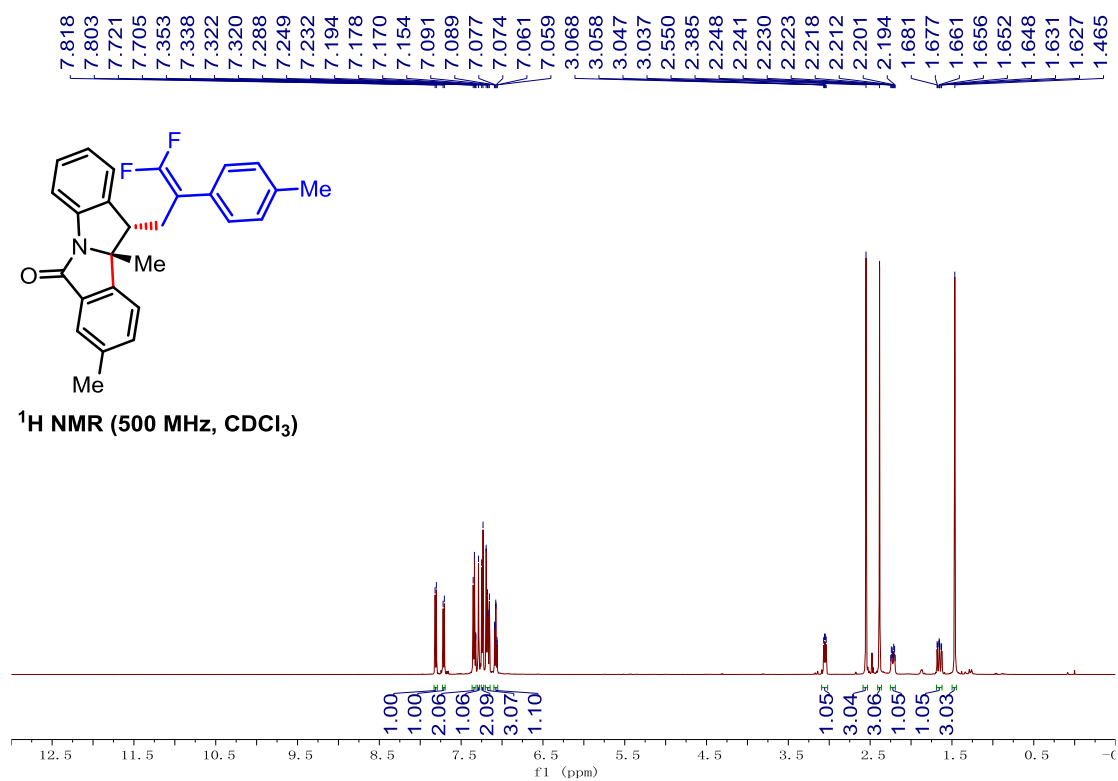

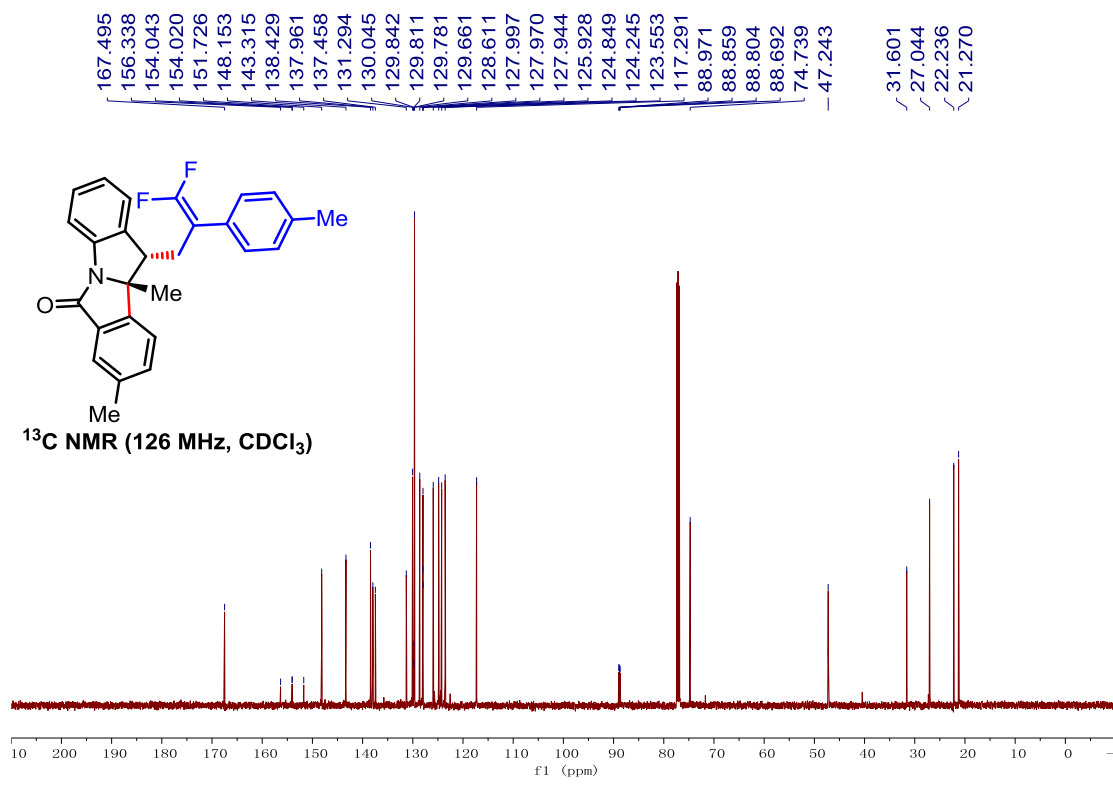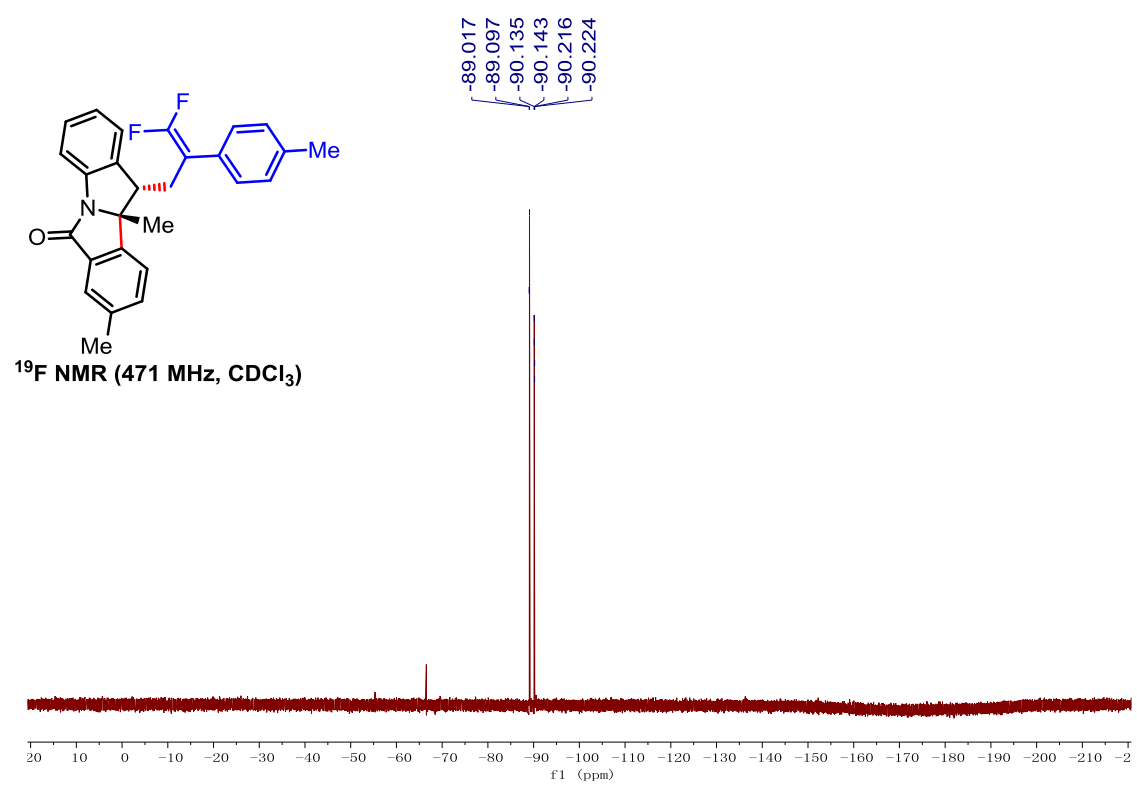

**(10*R*,11*S*)-11-(3,3-Difluoro-2-(*p*-tolyl)allyl)-8-methoxy-10*b*-methyl-10*b*,11-dihydro-6*H*-isoindolo[2,1-*a*]indol-6-one, 31**

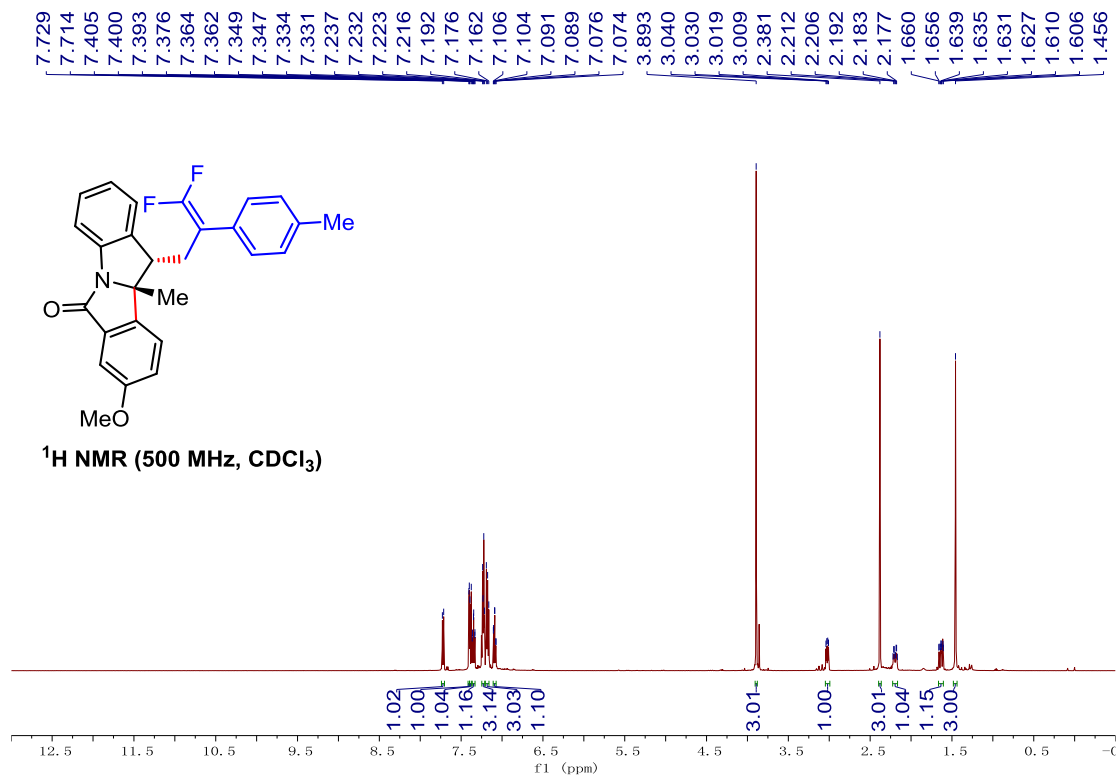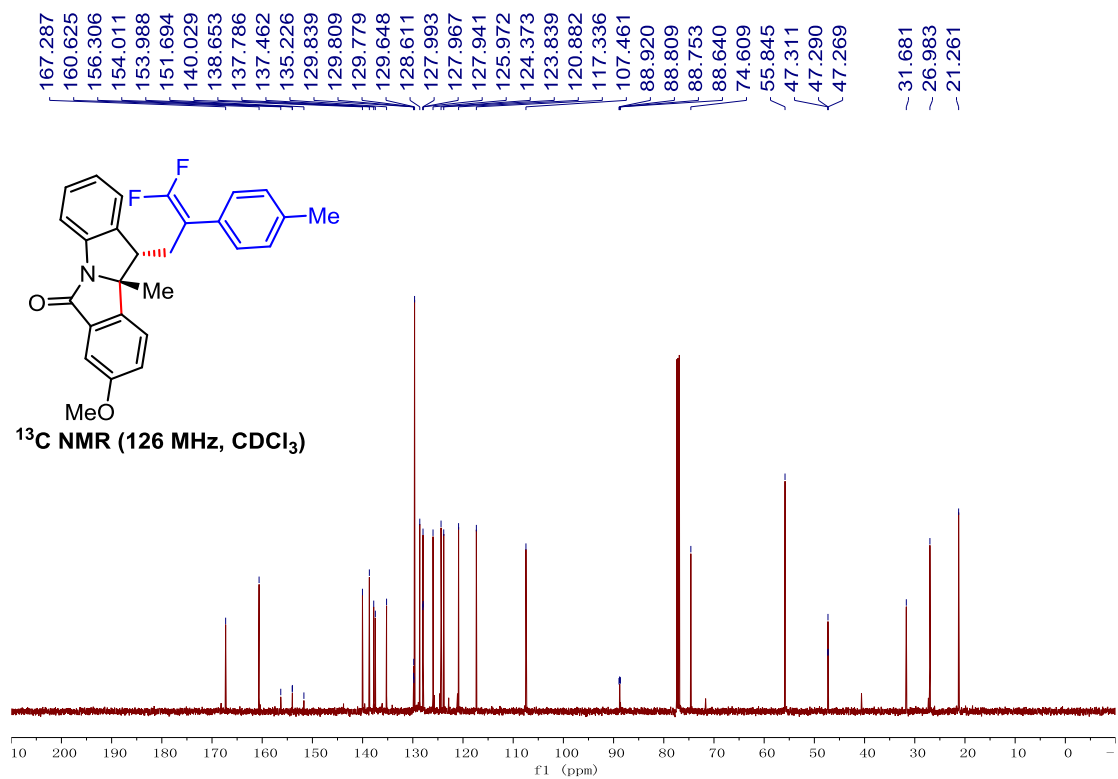



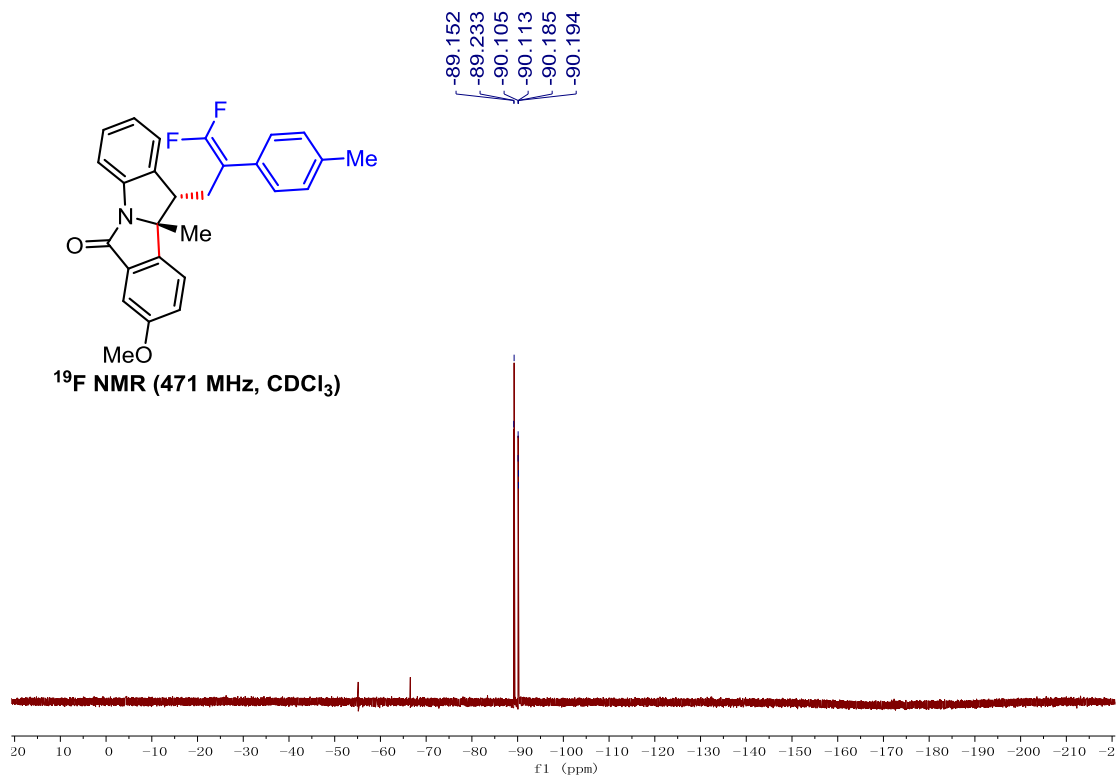

**(10bR,11S)-11-(3,3-Difluoro-2-(p-tolyl)allyl)-8-fluoro-10b-methyl-10b,11-dihydro-6H-isoindolo[2,1-a]indol-6-one, 32**

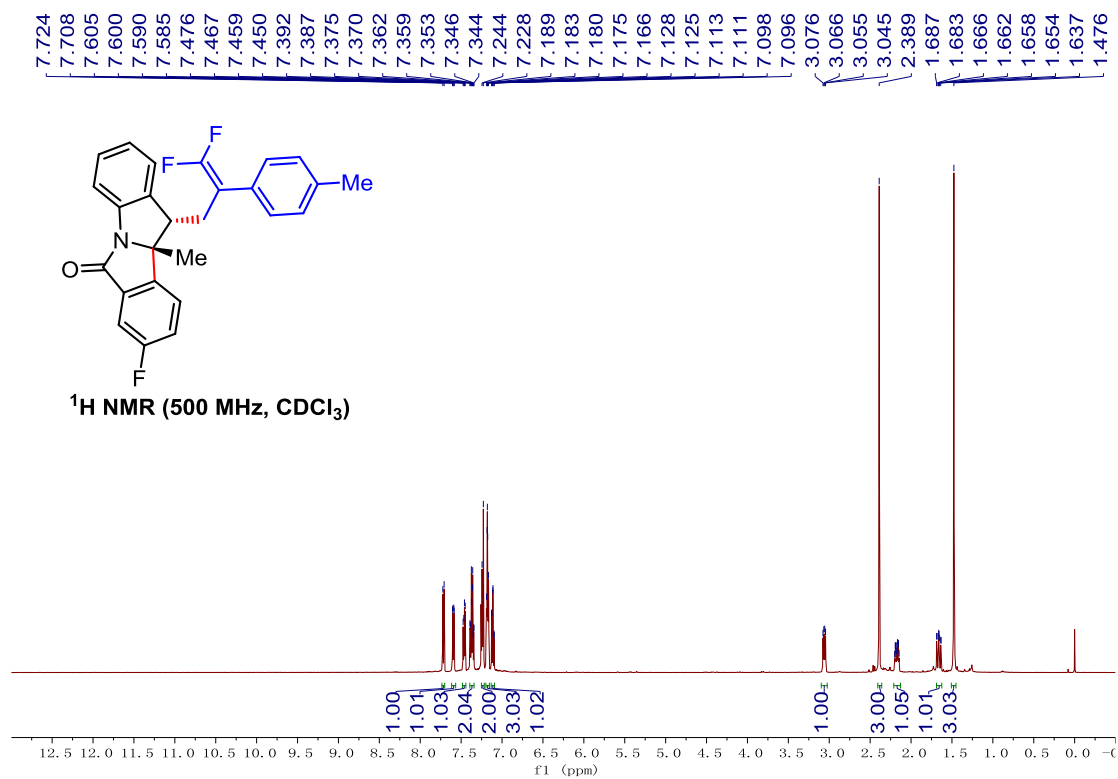

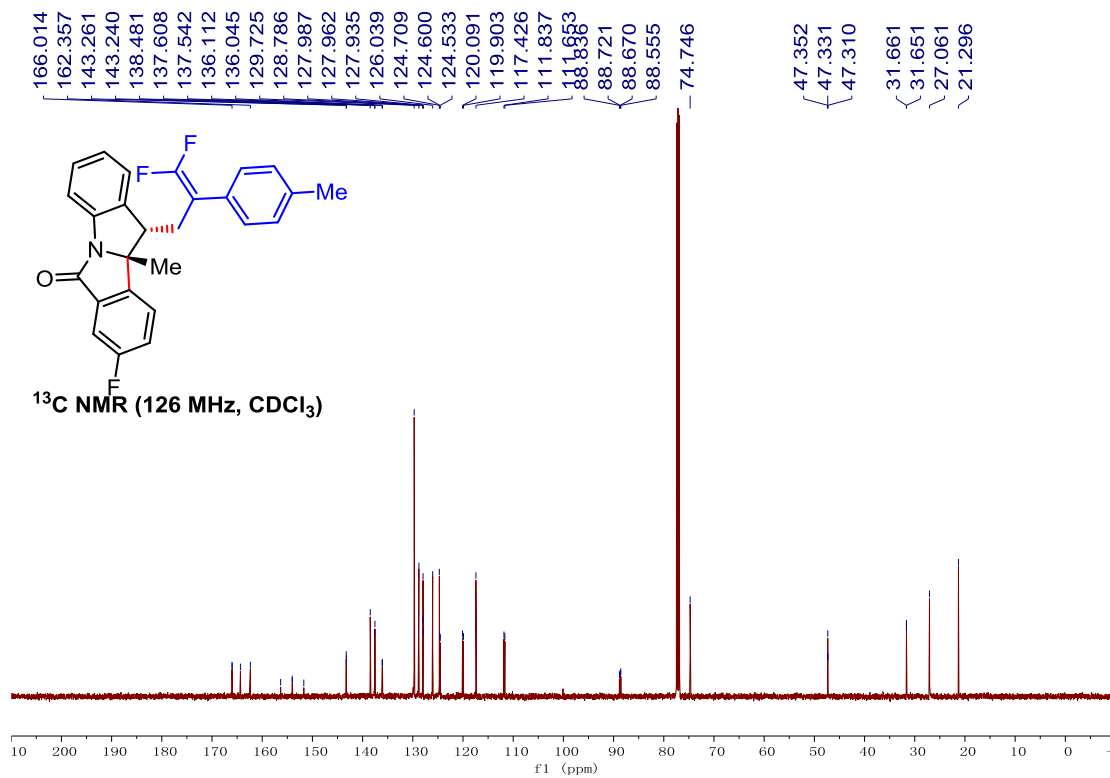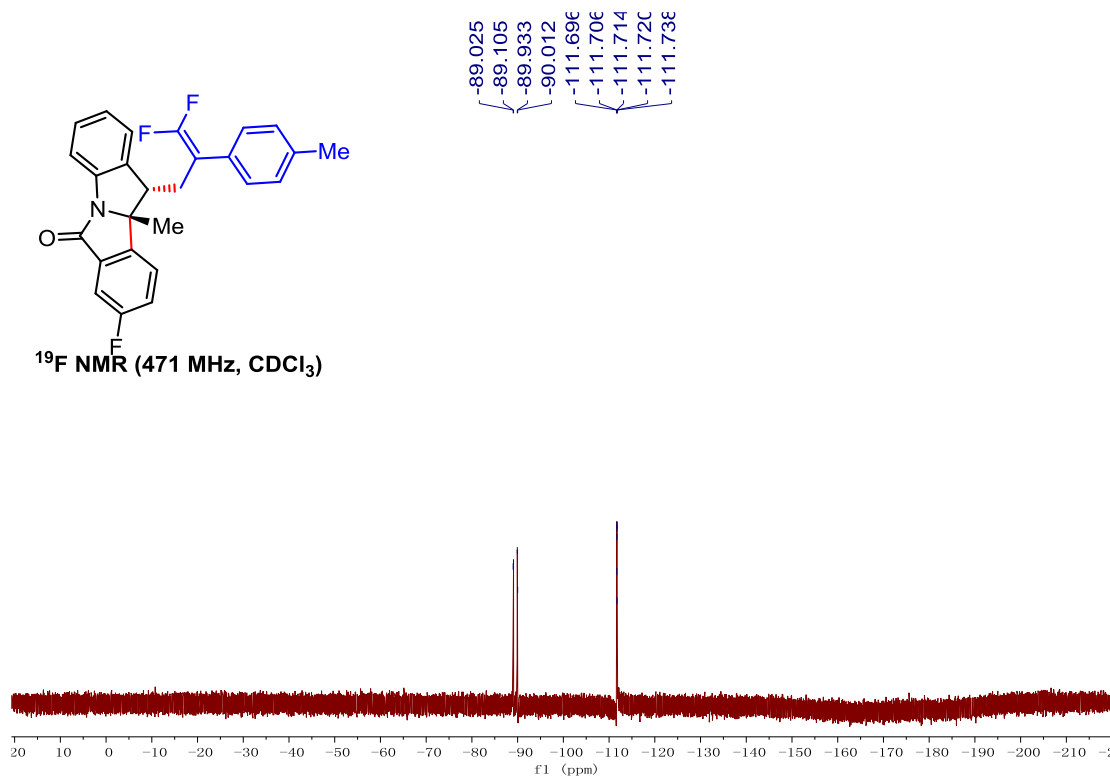

**(10*R*,11*S*)-8-Chloro-11-(3,3-difluoro-2-(*p*-tolyl)allyl)-10*b*-methyl-10*b*,11-dihydro-6*H*-isoindolo[2,1-*a*]indol-6-one, 33**

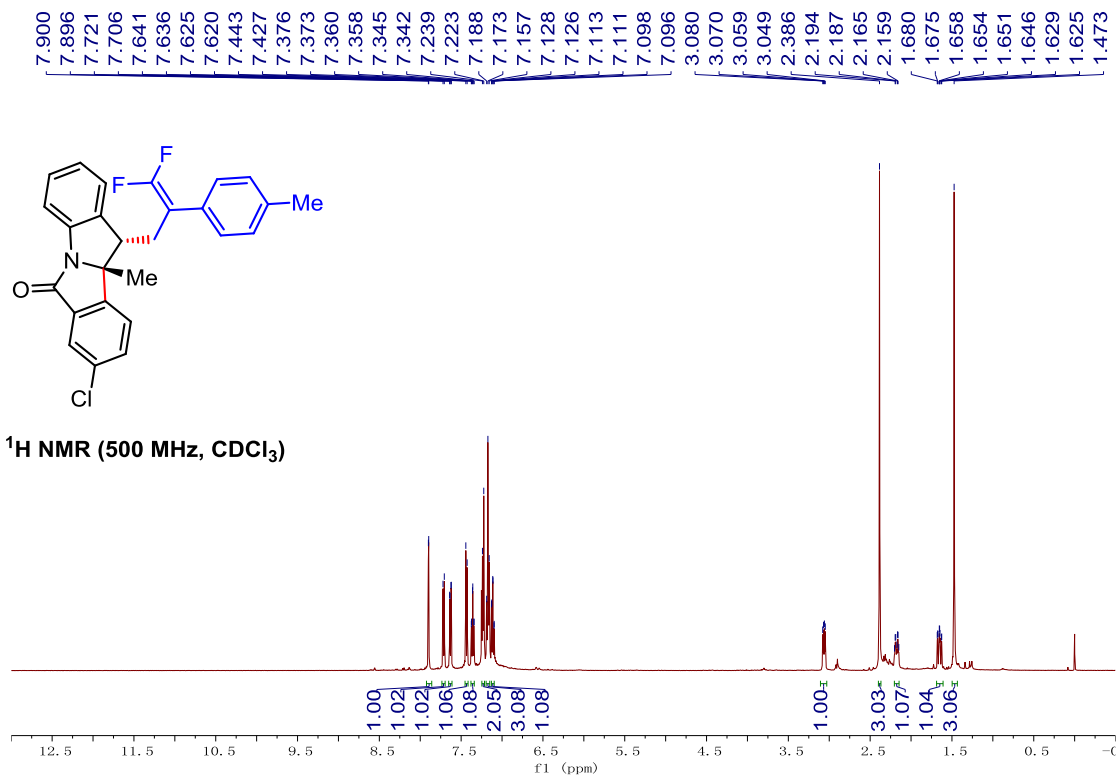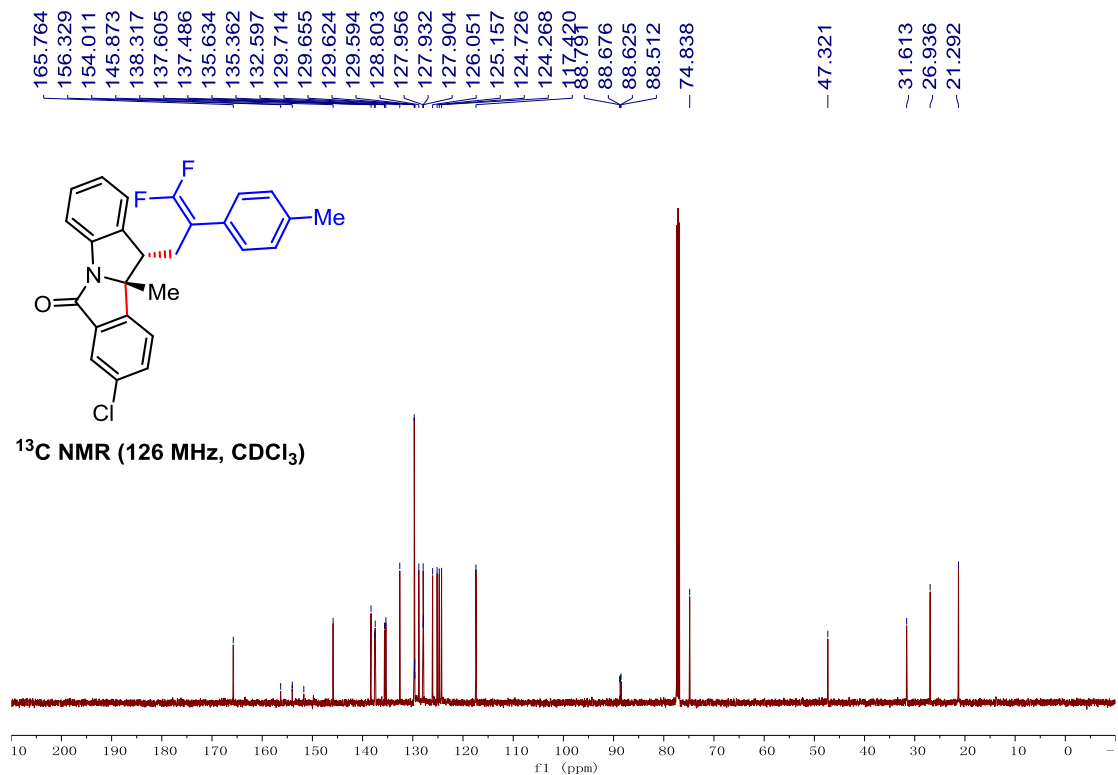

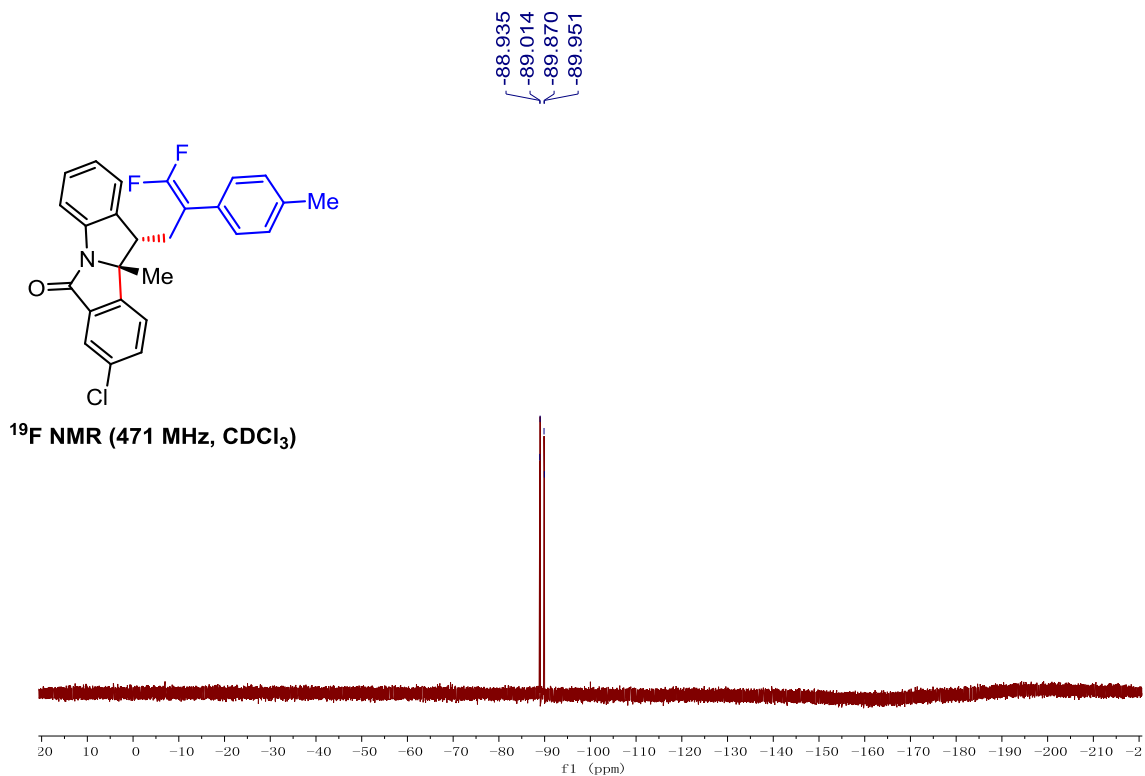

**(10bR,11S)-11-(3,3-Difluoro-2-(*p*-tolyl)allyl)-10b-methyl-8-(trifluoromethyl)-10b,11-dihydro-6*H*-isoindolo[2,1-*a*]indol-6-one, 34**

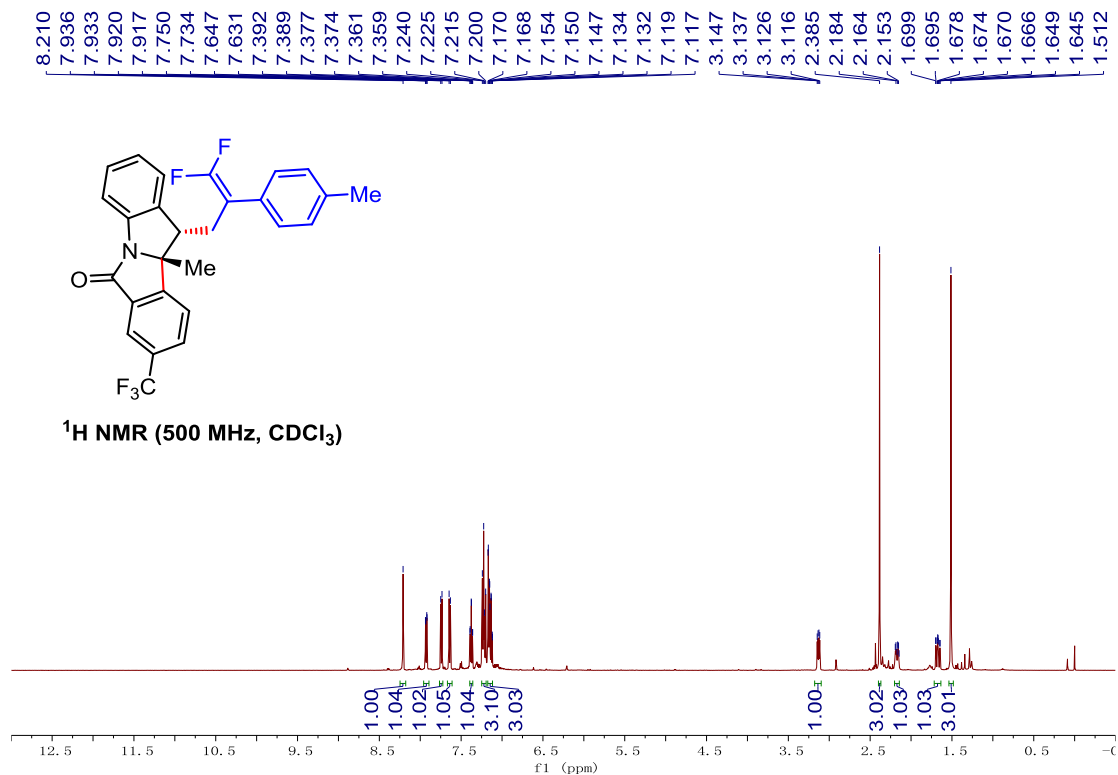

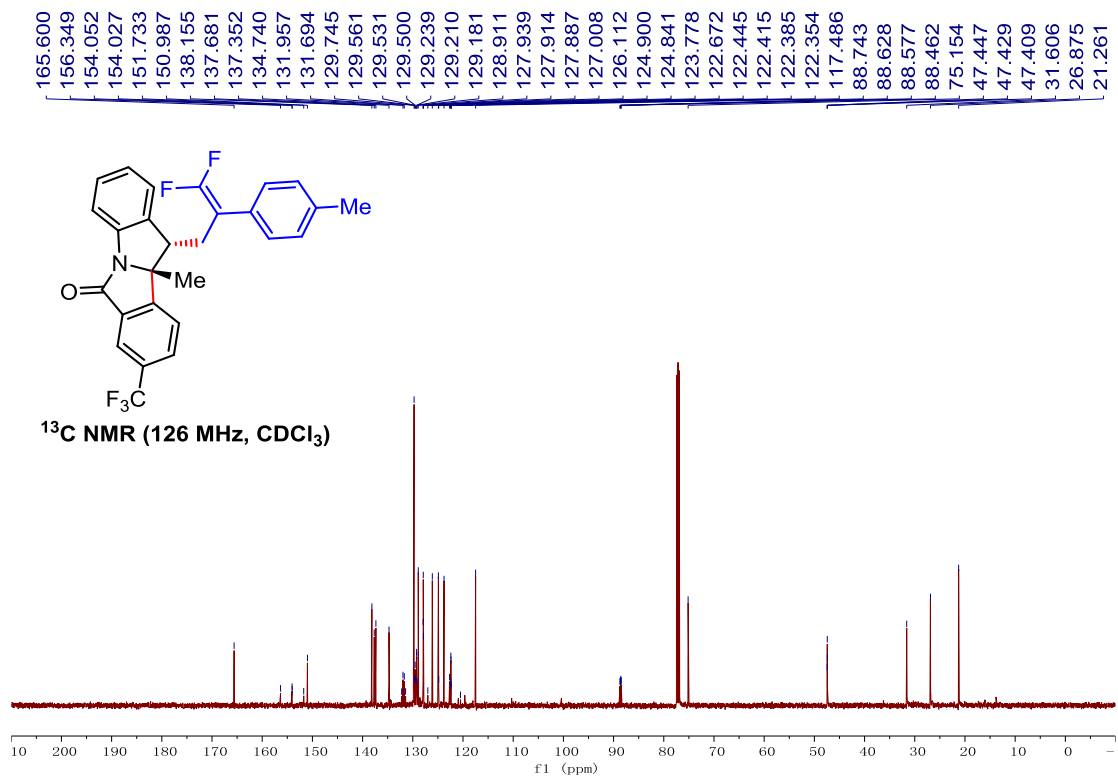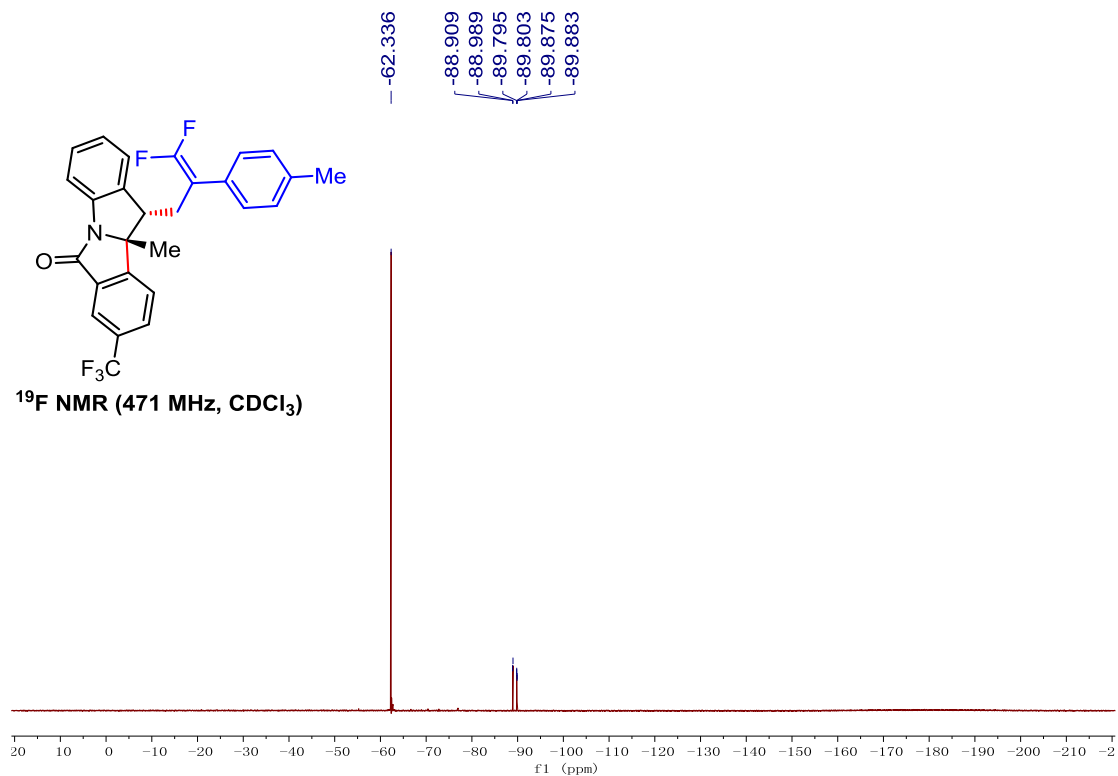

**(10*R*,11*S*)-11-(3,3-Difluoro-2-(*p*-tolyl)allyl)-2,10*b*-dimethyl-10*b*,11-dihydro-6*H*-isoindolo[2,1-*a*]indol-6-one, 35**

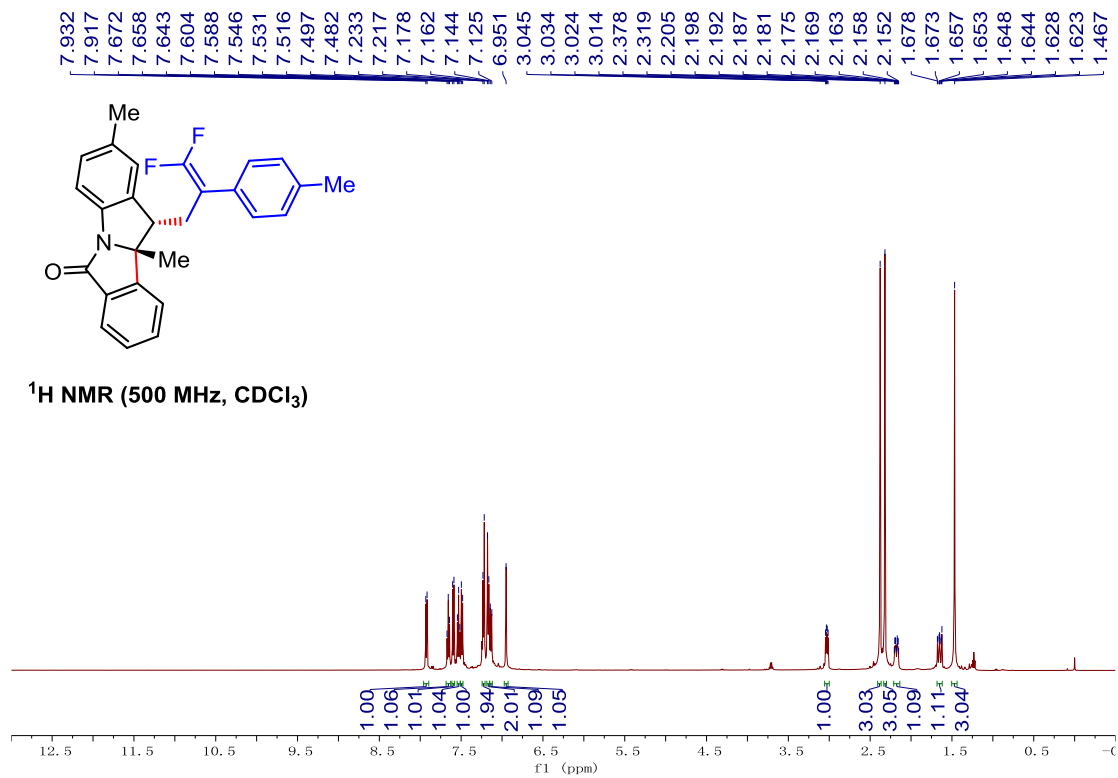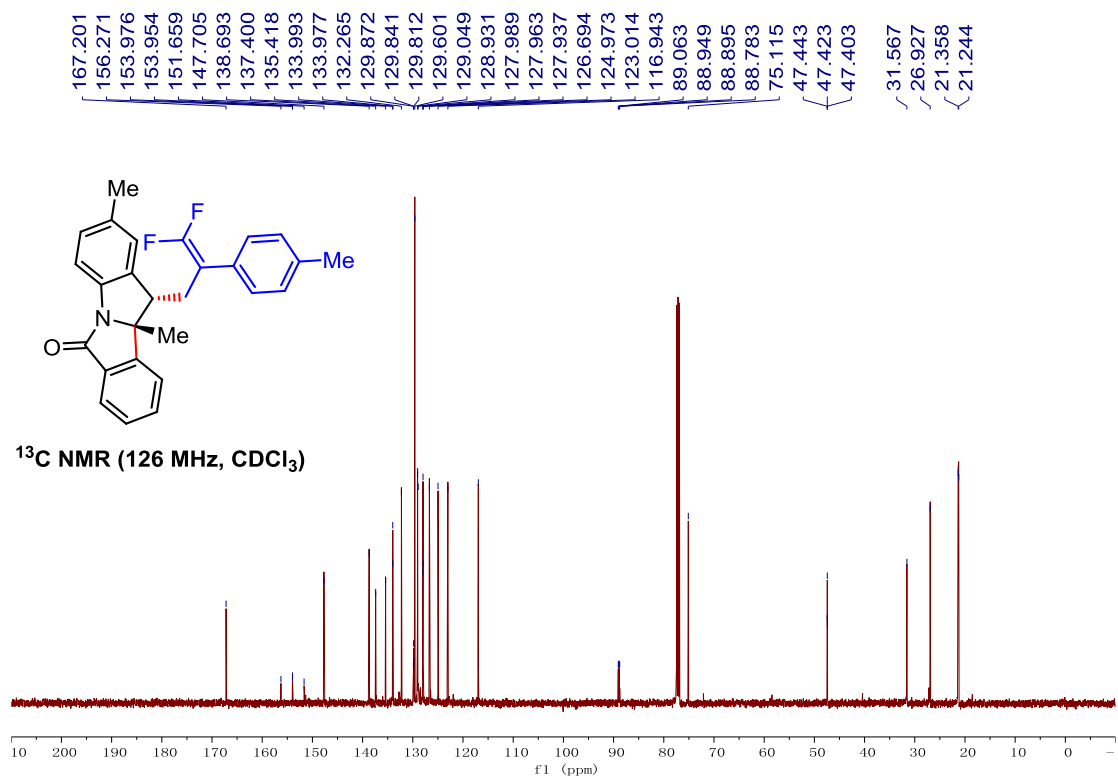

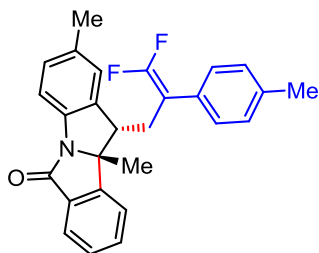

<sup>19</sup>F NMR (471 MHz, CDCl<sub>3</sub>)

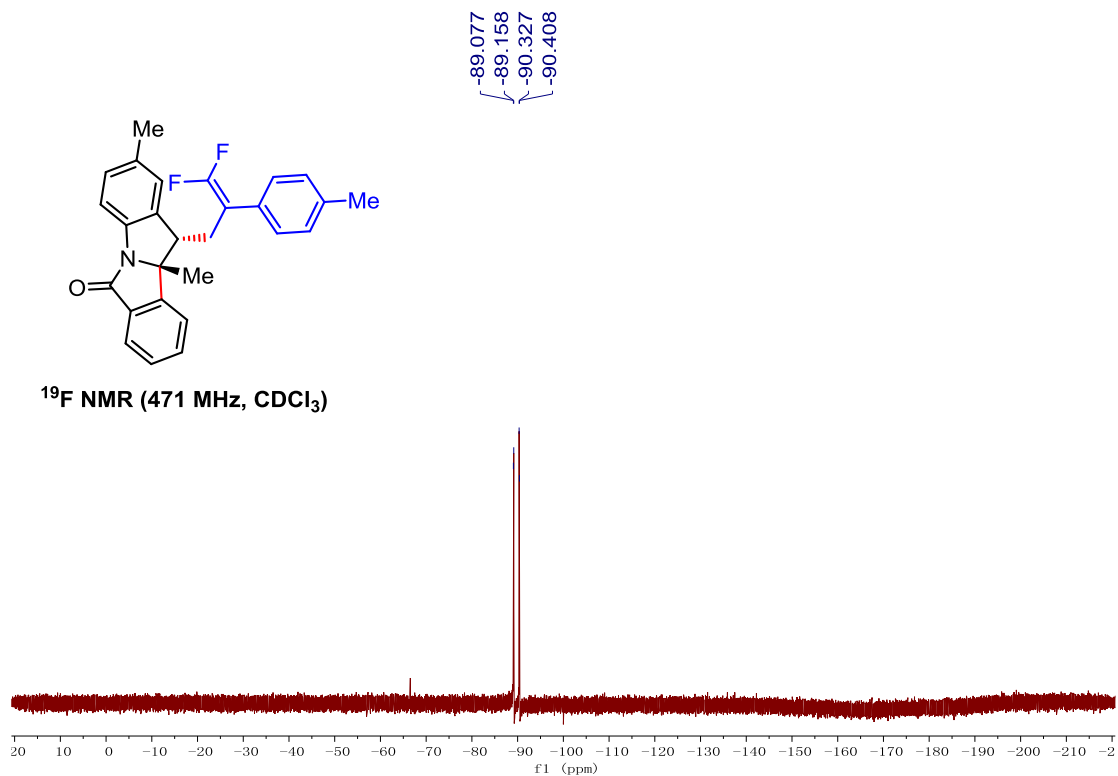

(10bR,11S)-11-(3,3-Difluoro-2-(p-tolyl)allyl)-2-methoxy-10b-methyl-10b,11-dihydro-6H-isoindolo[2,1-a]indol-6-one, 36

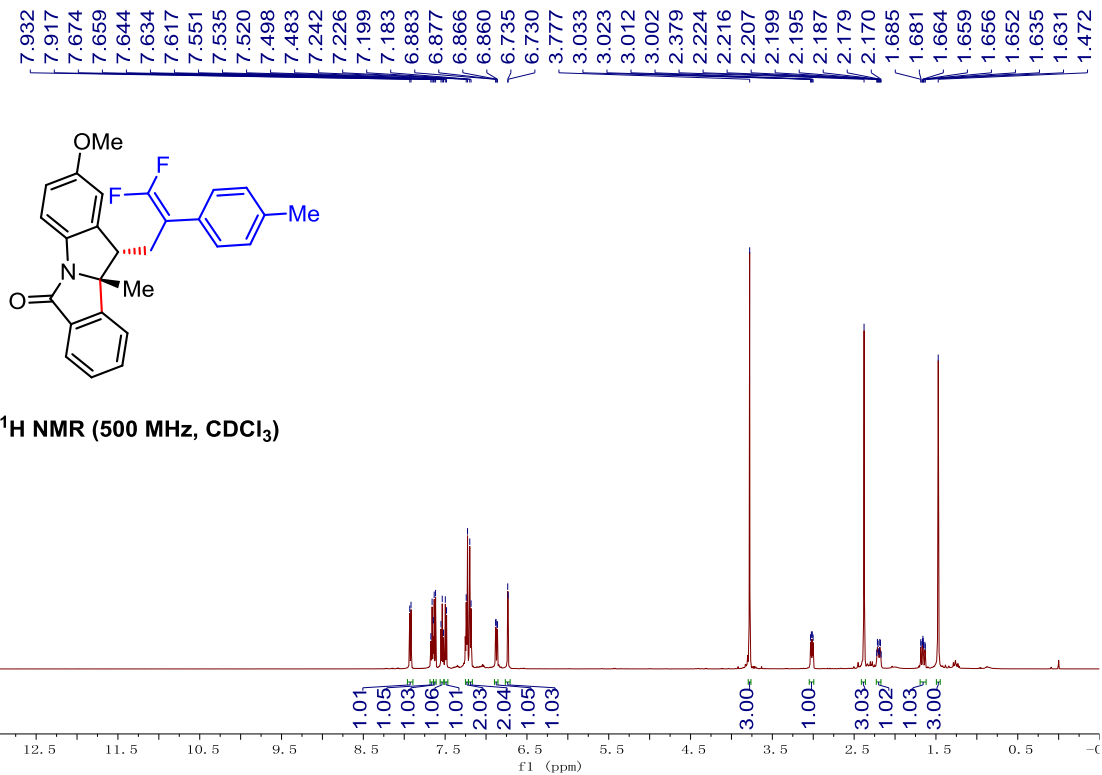

<sup>1</sup>H NMR (500 MHz, CDCl<sub>3</sub>)

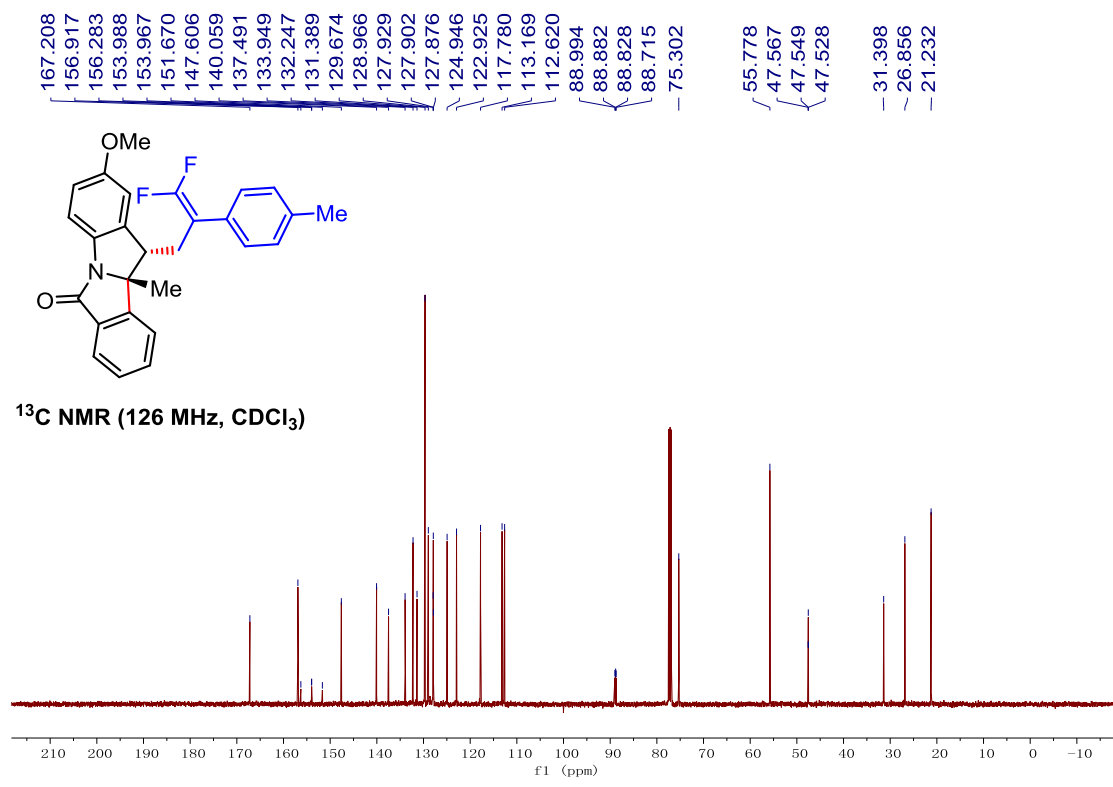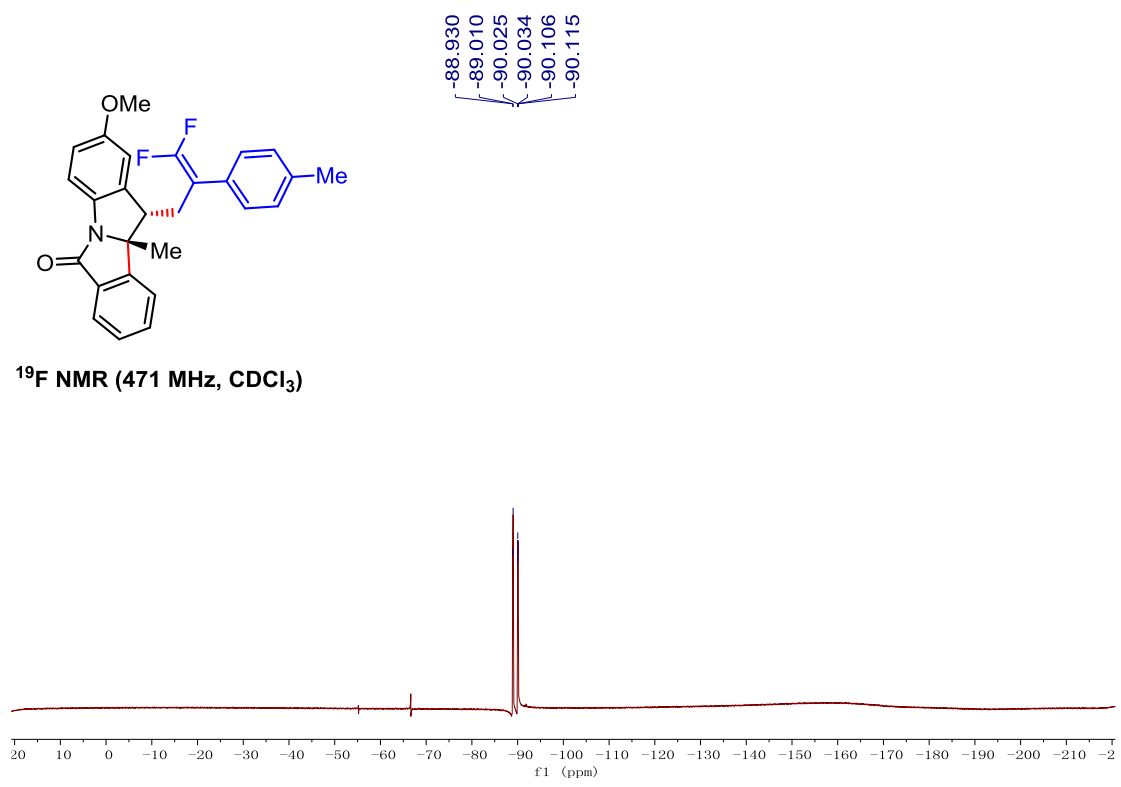



**(10*b*R,11*S*)-11-(3,3-Difluoro-2-(*p*-tolyl)allyl)-2-fluoro-10*b*-methyl-10*b*,11-dihydro-6*H*-isoindolo[2,1-*a*]indol-6-one, 37**

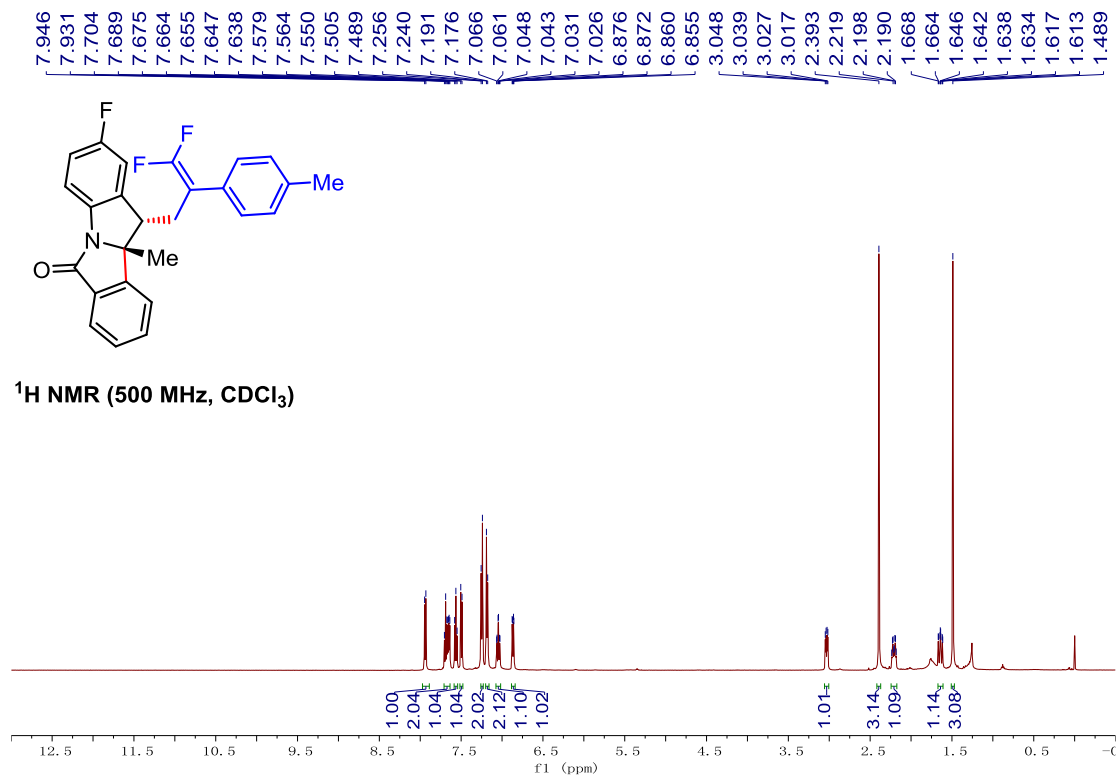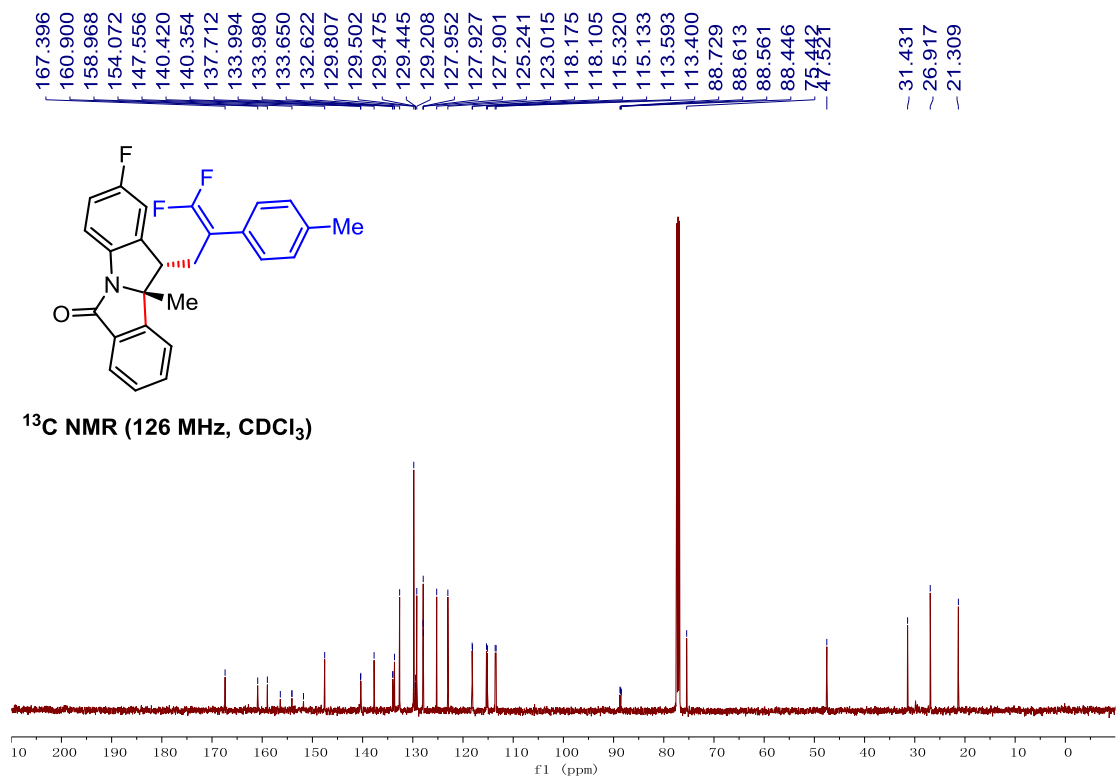

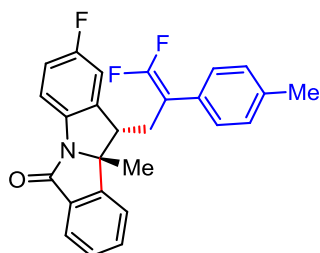

$^{19}\text{F}$  NMR (471 MHz,  $\text{CDCl}_3$ )

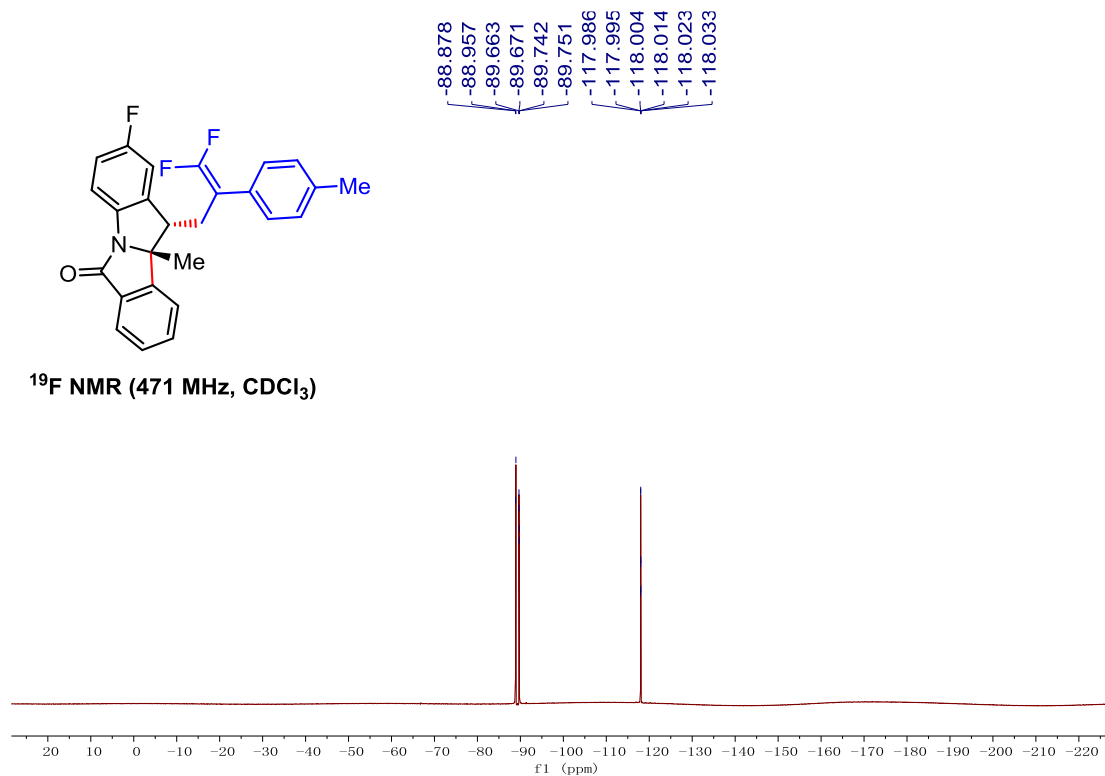

(10bR,11S)-2-Chloro-11-(3,3-difluoro-2-(p-tolyl)allyl)-10b-methyl-10b,11-dihydro-6H-isoindolo[2,1-a]indol-6-one, 38

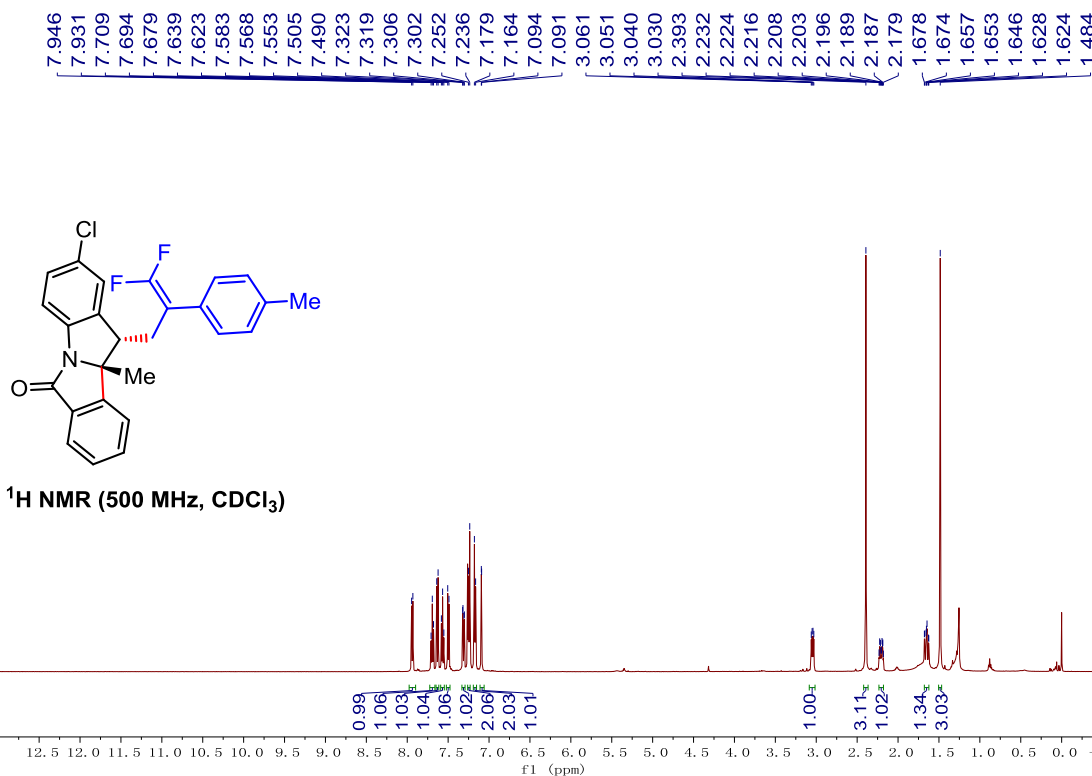

$^1\text{H}$  NMR (500 MHz,  $\text{CDCl}_3$ )

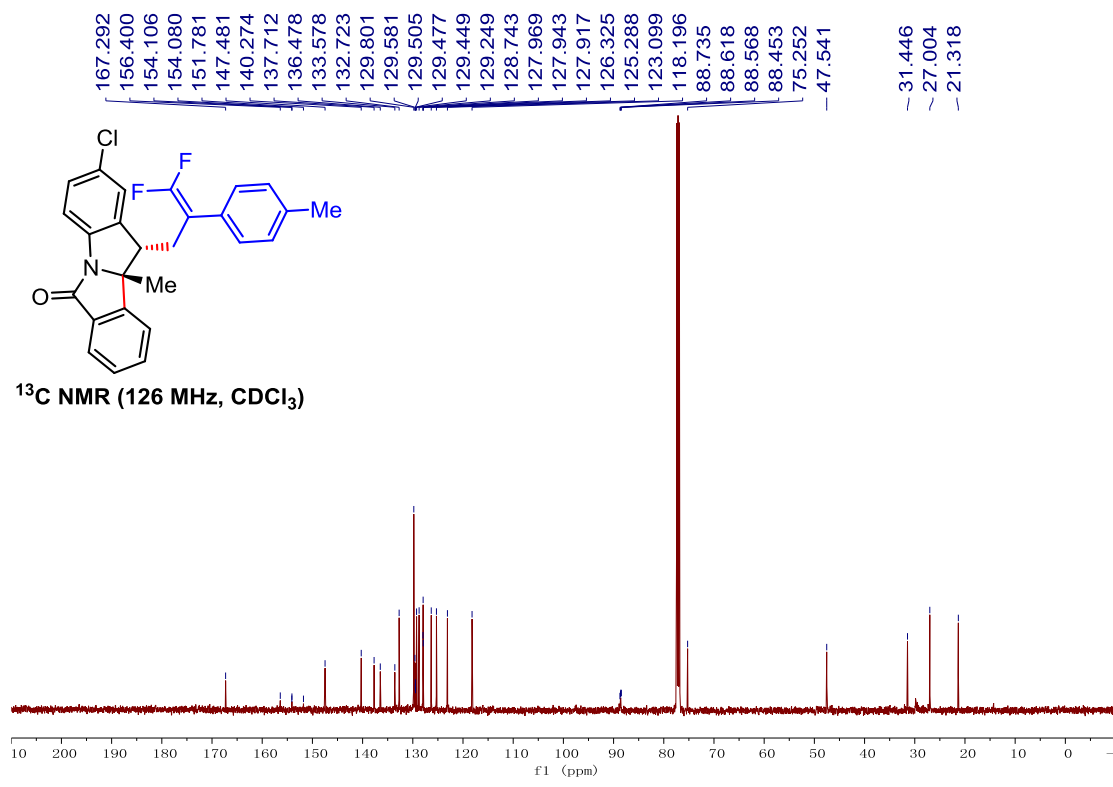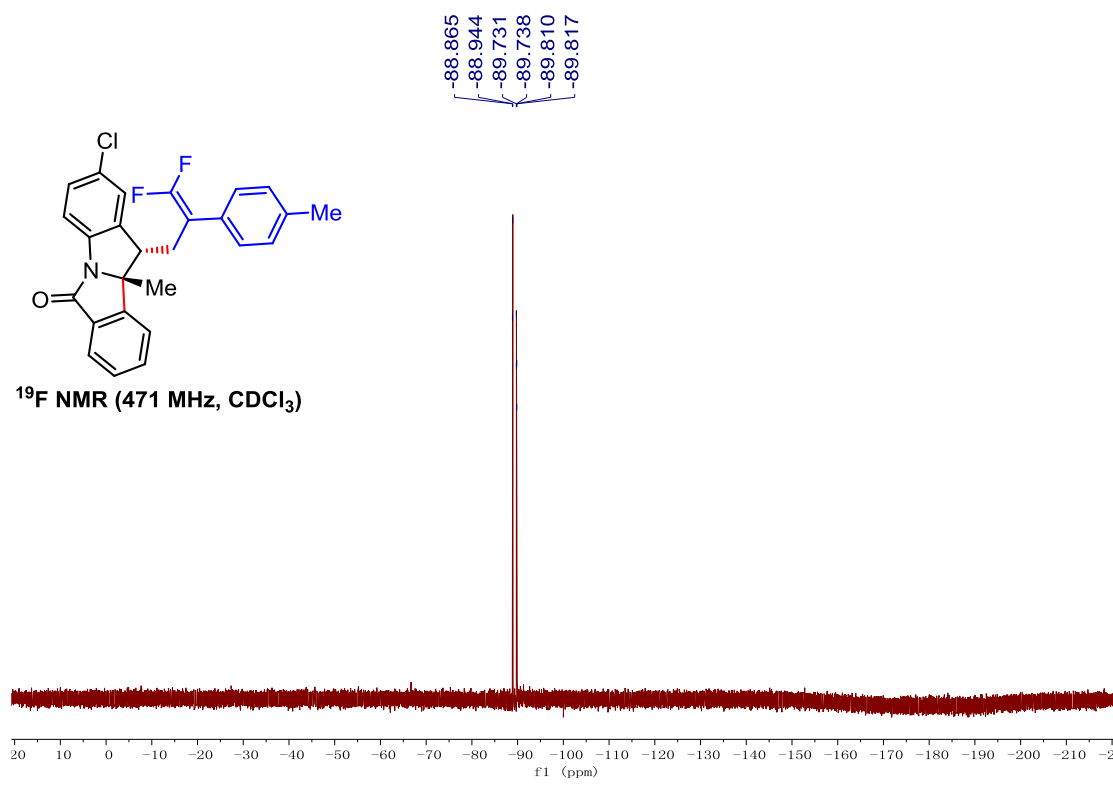

**(10*b*S,11*S*)-11-(3,3-Difluoro-2-(*p*-tolyl)allyl)-10*b*-phenyl-10*b*,11-dihydro-6*H*-isoindolo[2,1-*a*]indol-6-one, 39**

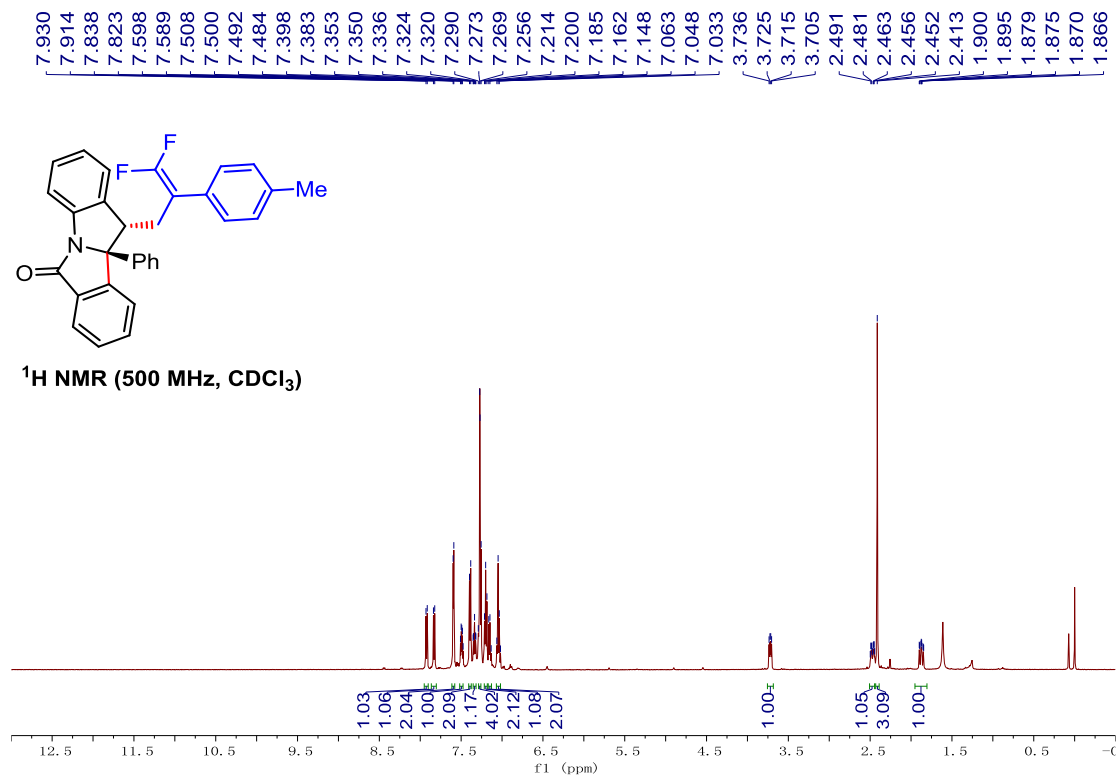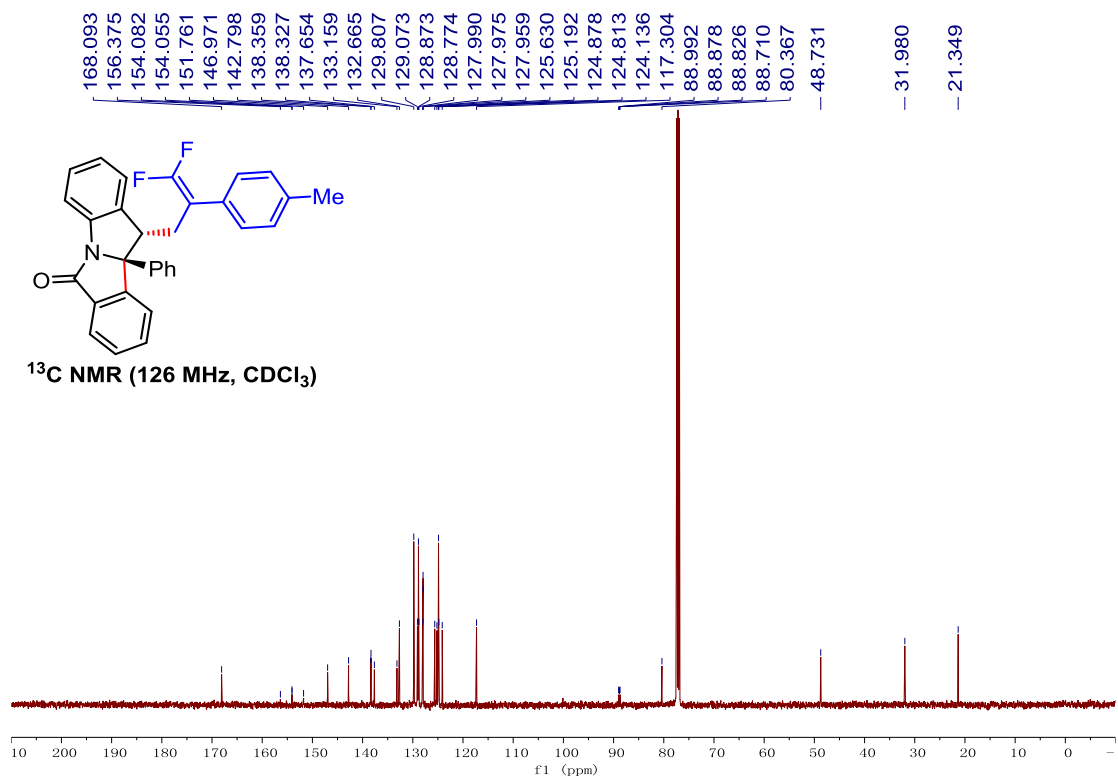

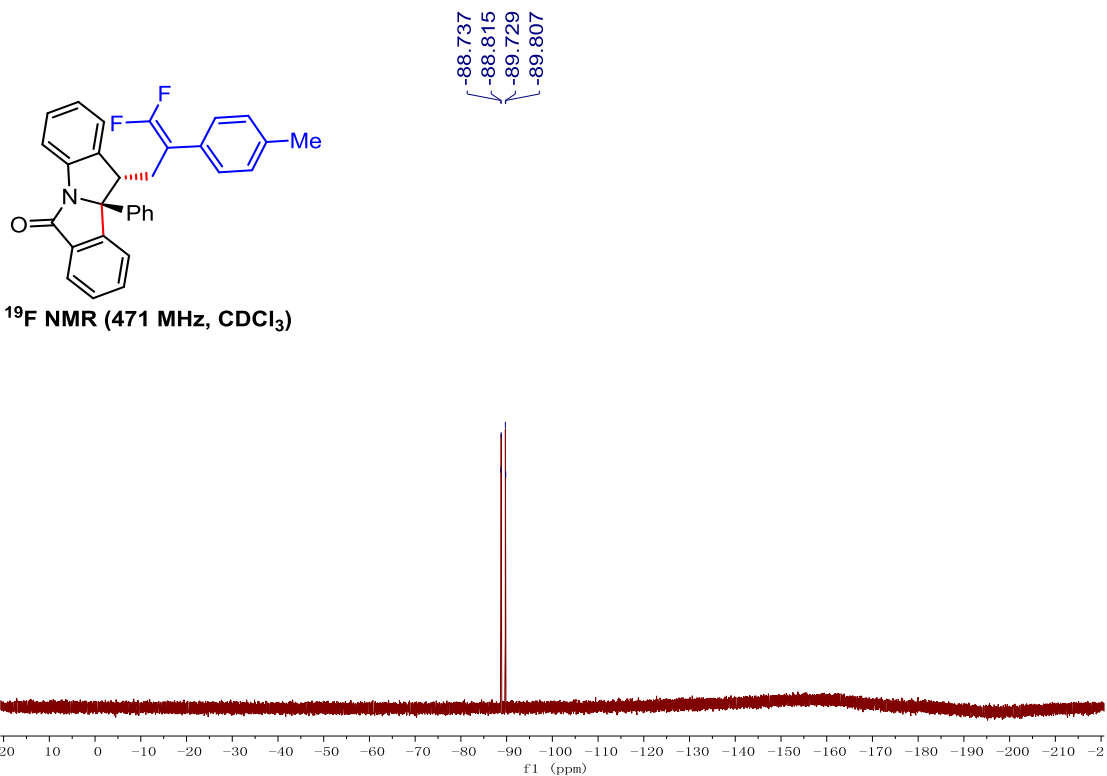

**(10bR,11S)-10b-Butyl-11-(3,3-difluoro-2-(p-tolyl)allyl)-10b,11-dihydro-6H-isoindolo[2,1-a]indol-6-one, 40**

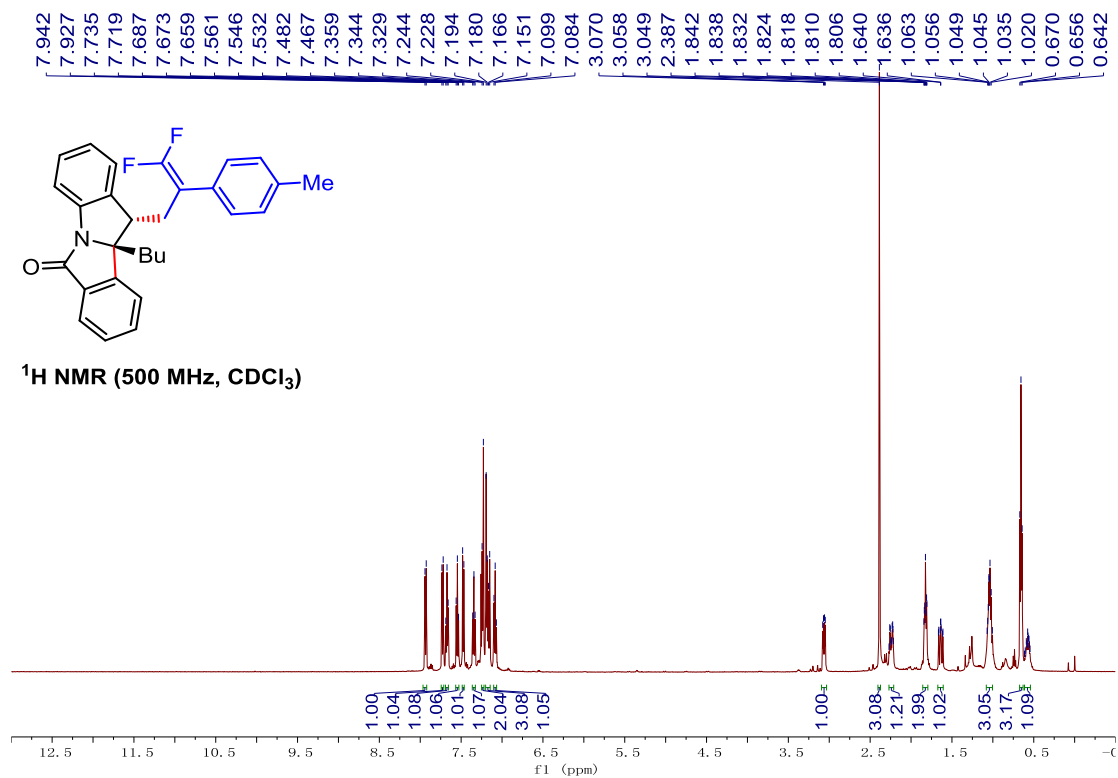

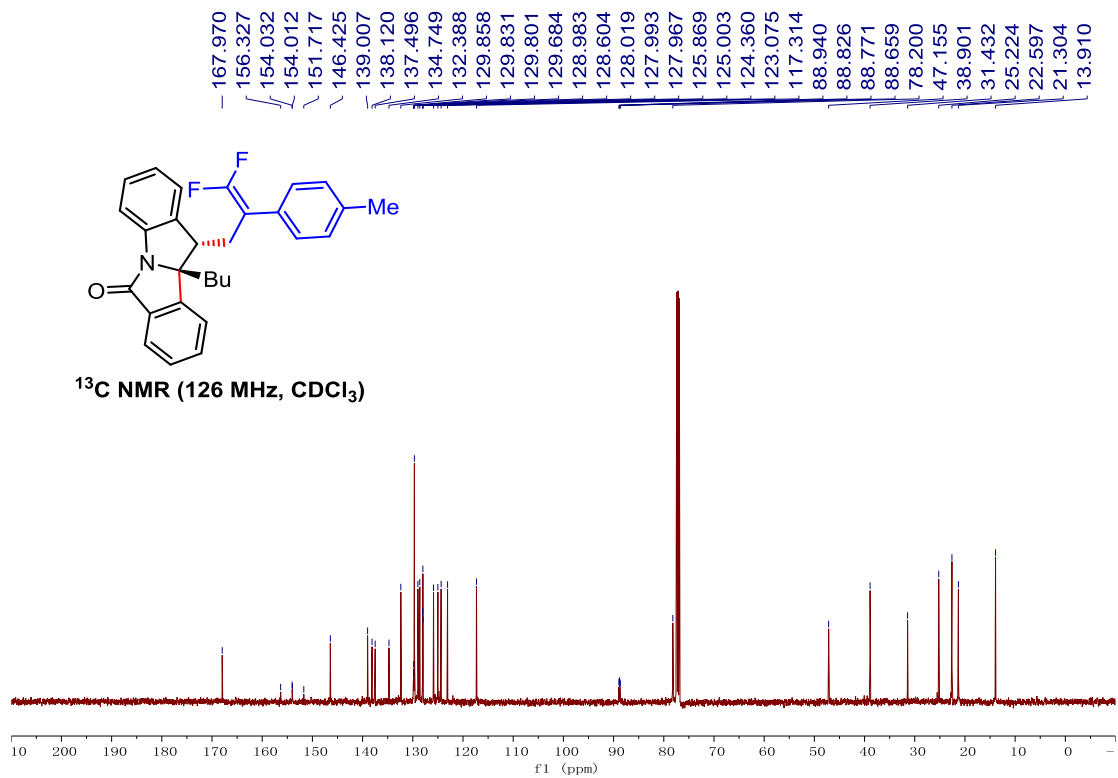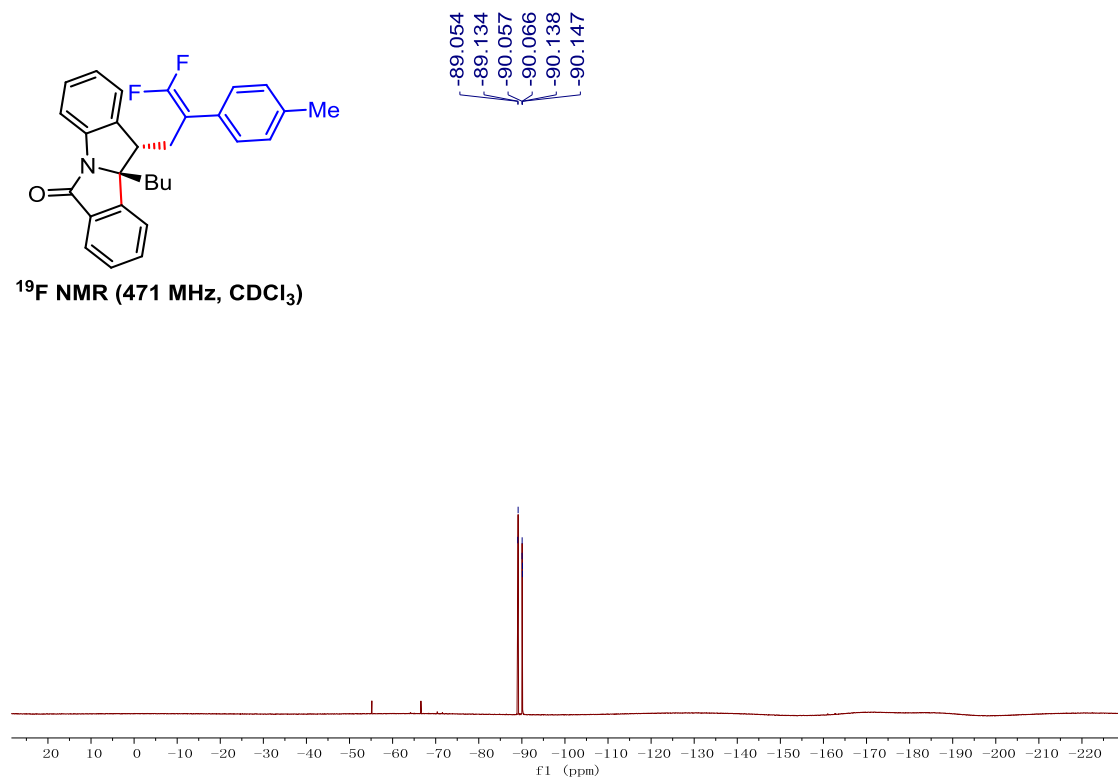

**2-(3-((10*R*,11*S*)-11-(3,3-Difluoro-2-(*p*-tolyl)allyl)-6-oxo-6*H*-isoindolo[2,1-*a*]indol-10*b*(11*H*)-yl)propyl)isoindoline-1,3-dione, 41**

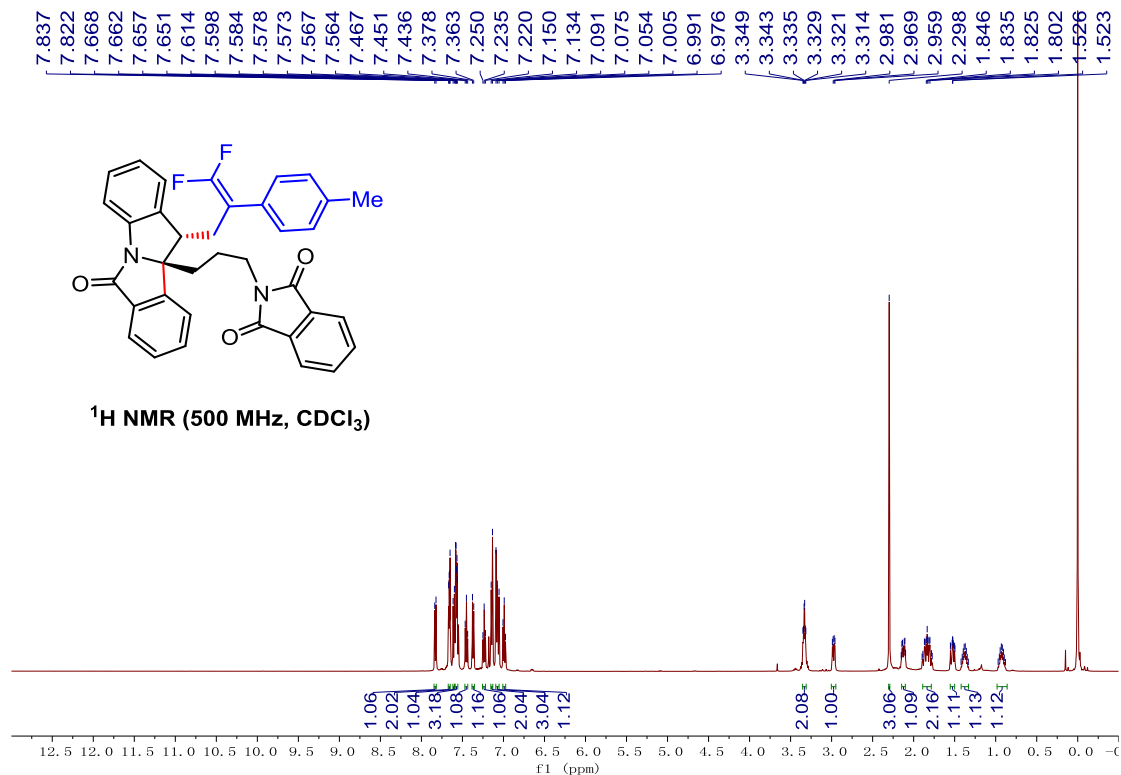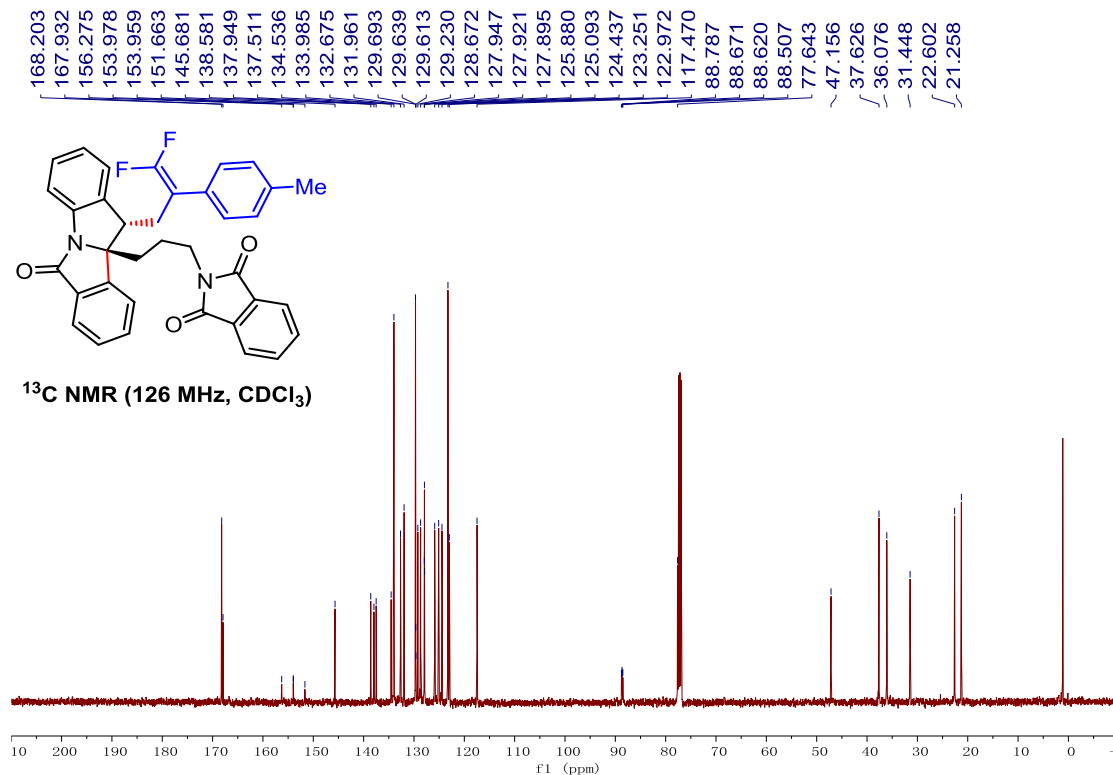

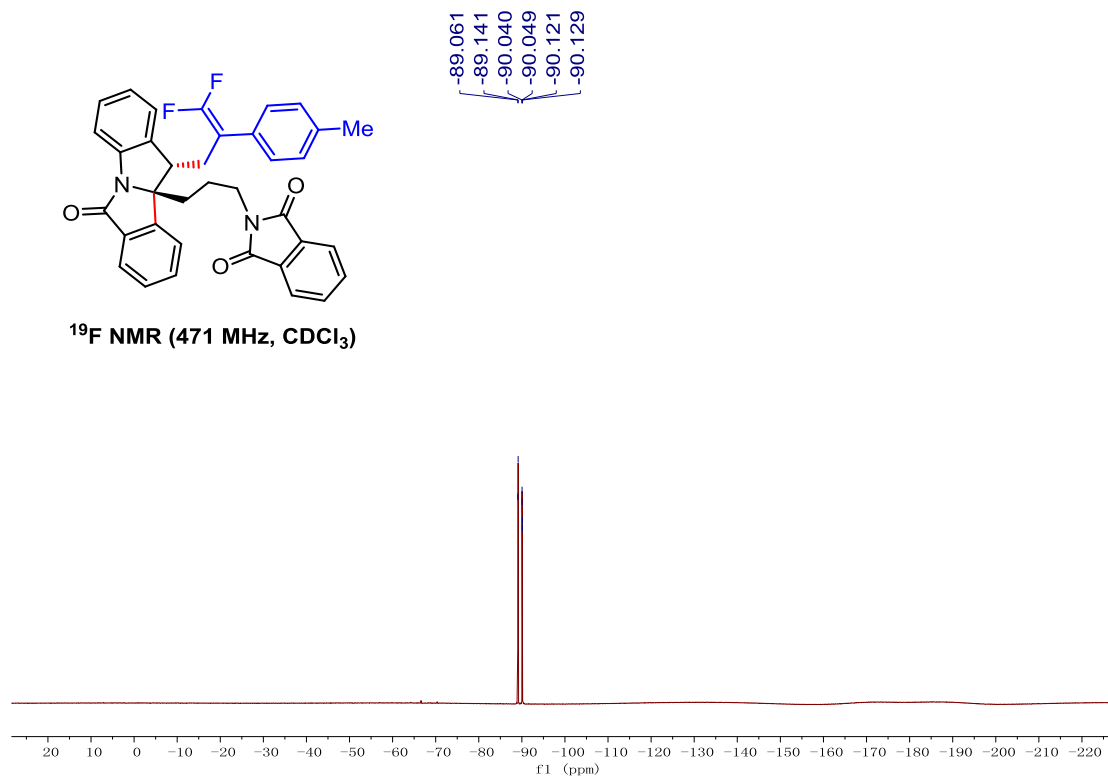

**4-(1,1-Difluoro-3-((10*bR*,11*S*)-10*b*-methyl-6-oxo-10*b*,11-dihydro-6*H*-isoindolo[2,1-*a*]indol-11-yl)prop-1-en-2-yl)phenyl adamantane-1-carboxylate, 42**

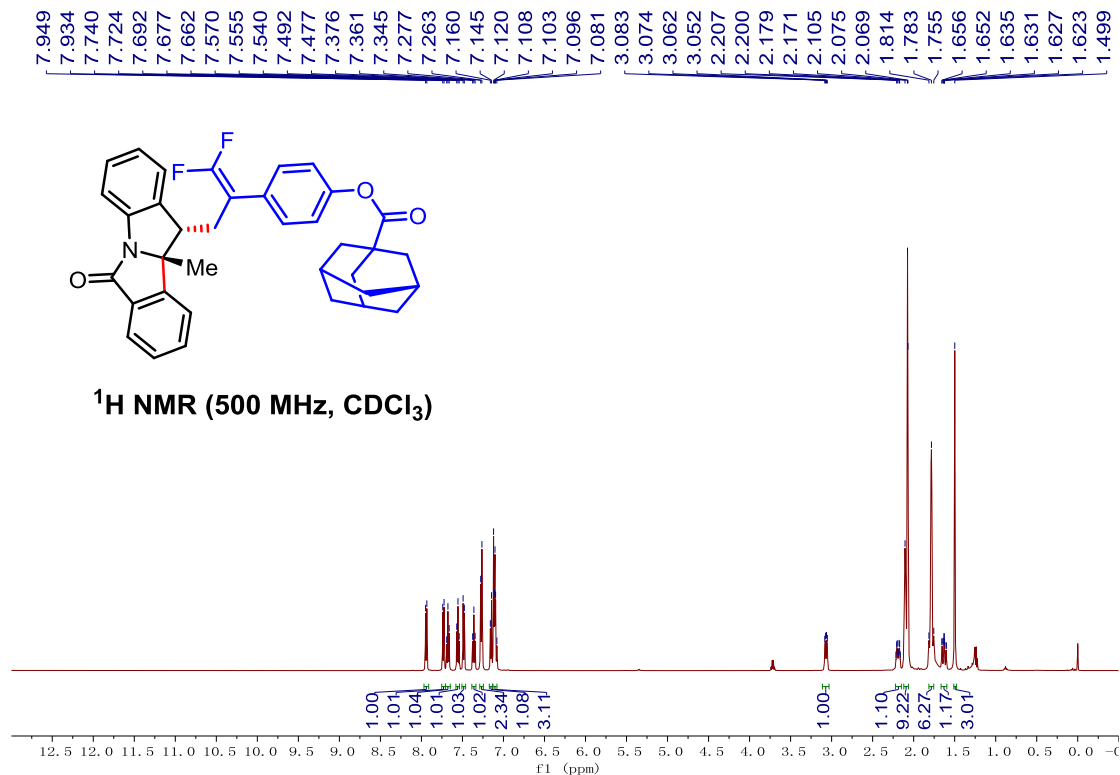



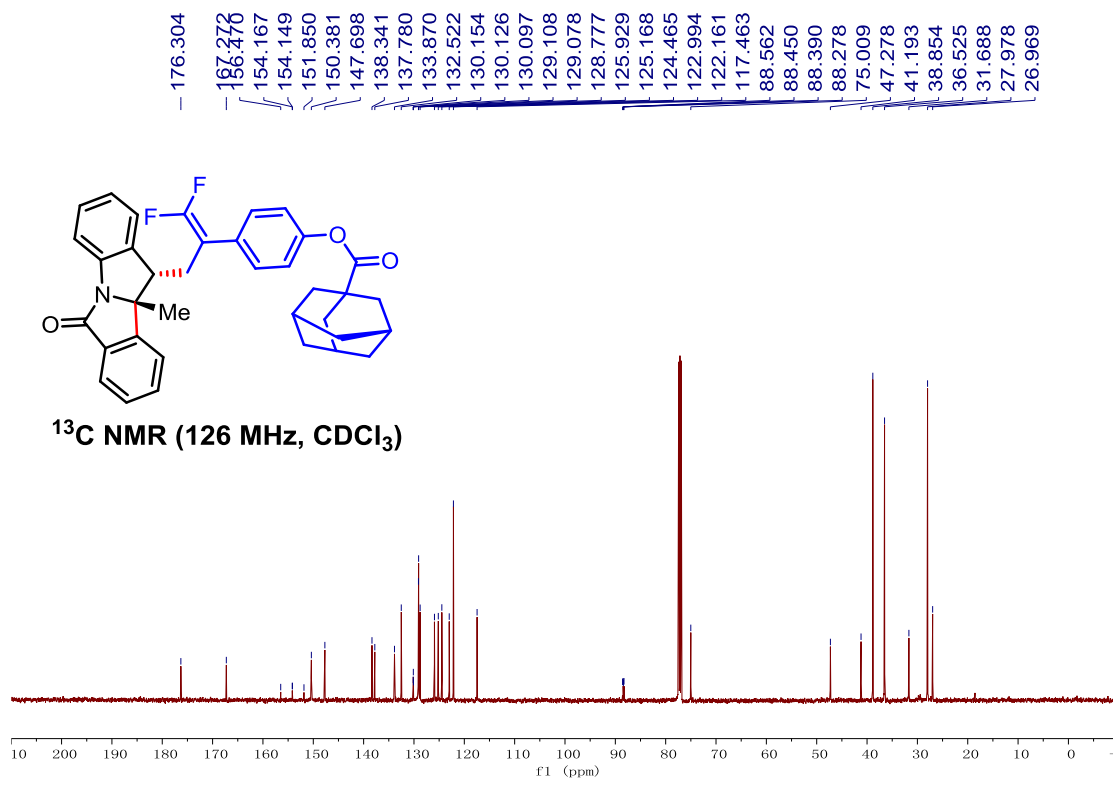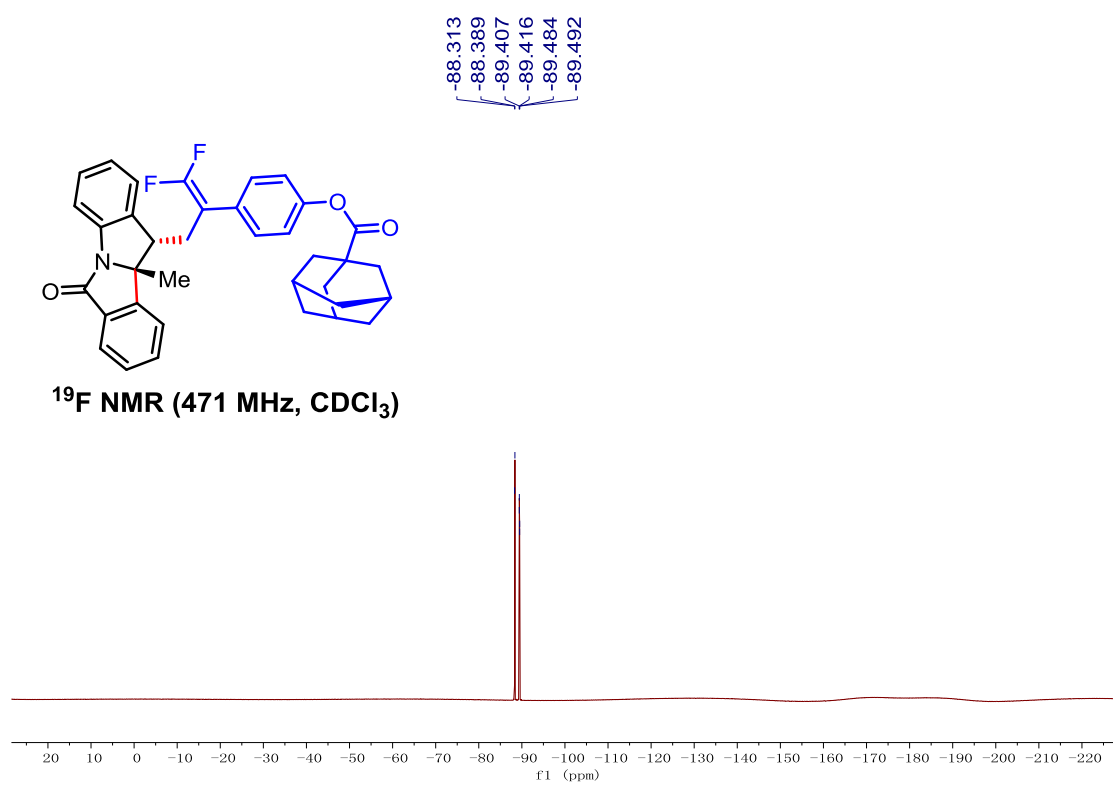

**4-(1,1-Difluoro-3-((10*bR*,11*S*)-10*b*-methyl-6-oxo-10*b*,11-dihydro-6*H*-isoindolo[2,1-*a*]indol-11-yl)prop-1-en-2-yl)phenyl 2-(4-isobutylphenyl)propanoate, 43**

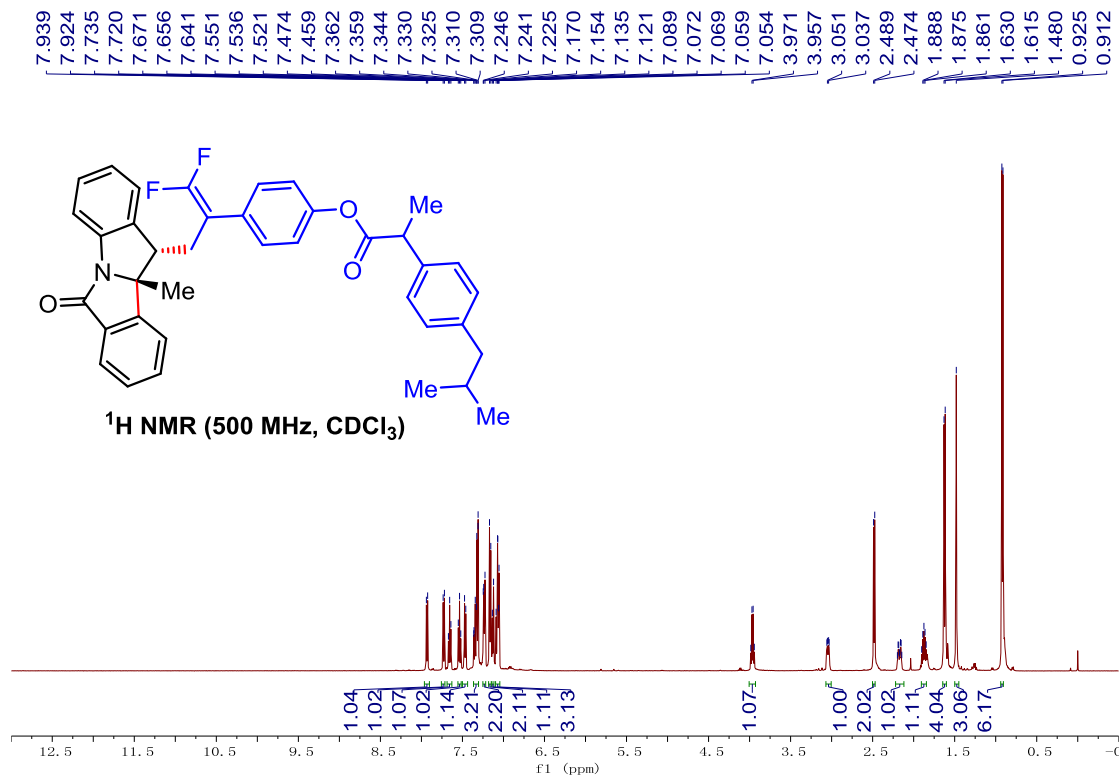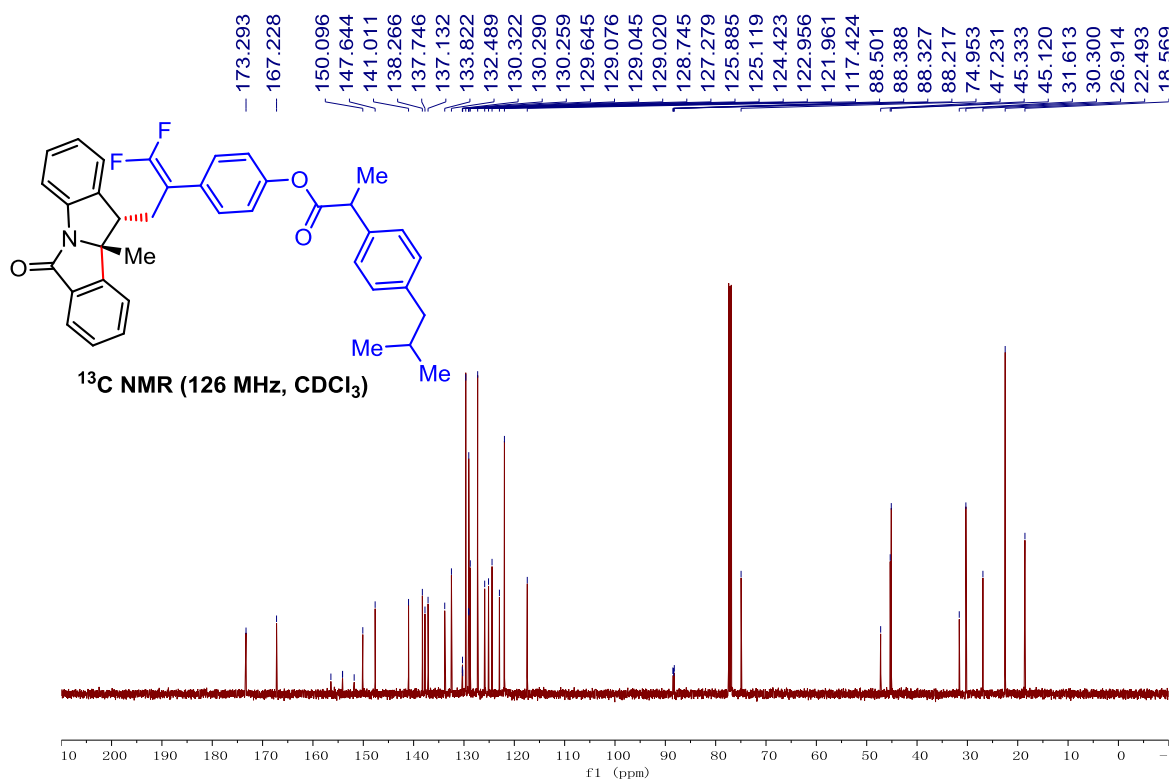

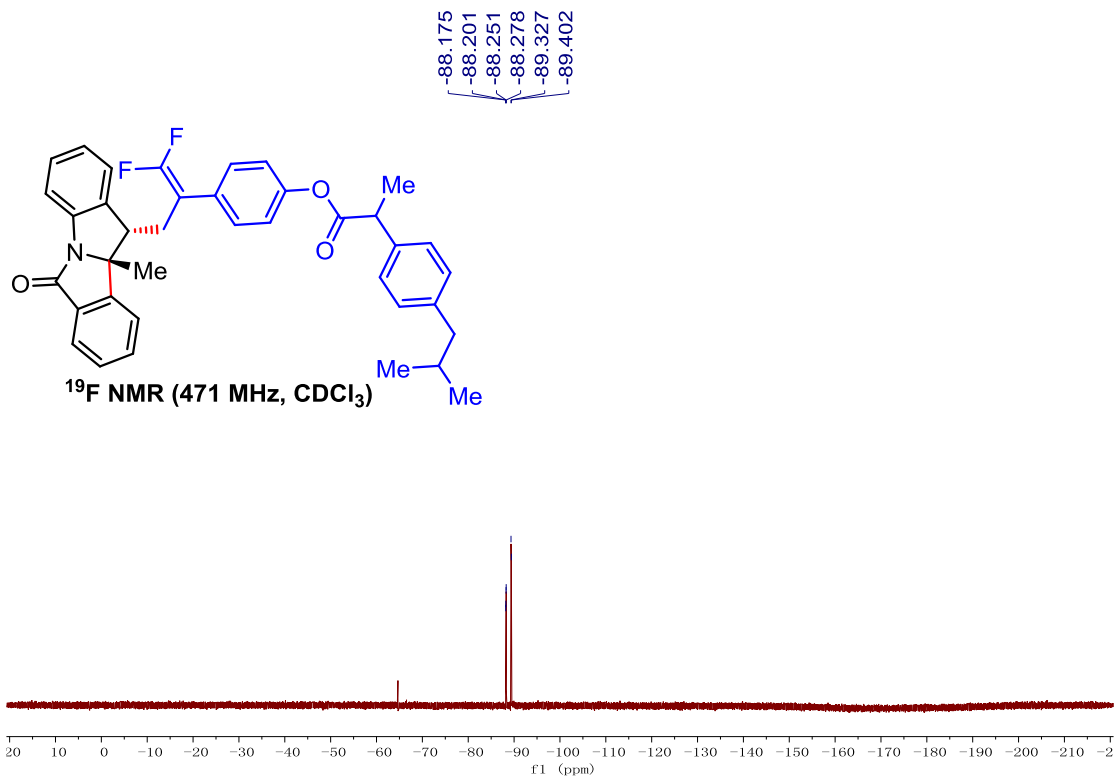

**(S)-2,5,7,8-Tetramethyl-2-((4S,8S)-4,8,12-trimethyltridecyl)chroman-6-yl 3-(1,1-difluoro-3-((10bR,11S)-10b-methyl-6-oxo-10b,11-dihydro-6H-isoindolo[2,1-a]indol-11-yl)prop-1-en-2-yl)benzoate, 44**

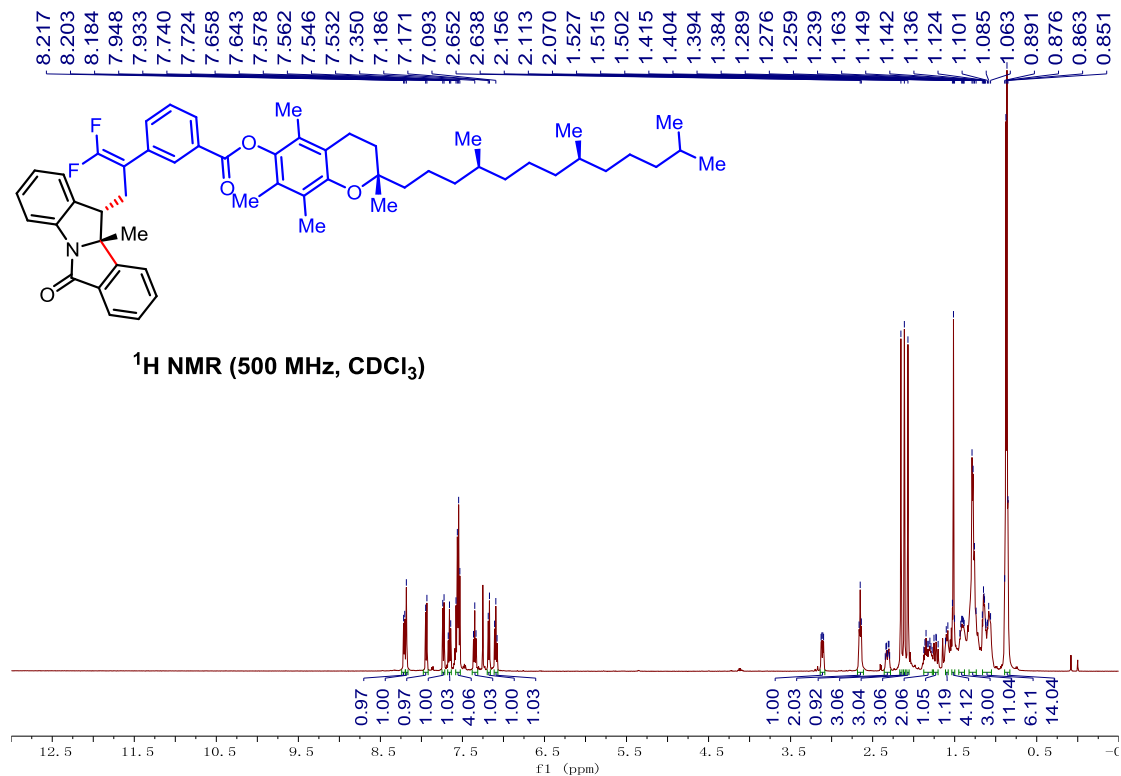

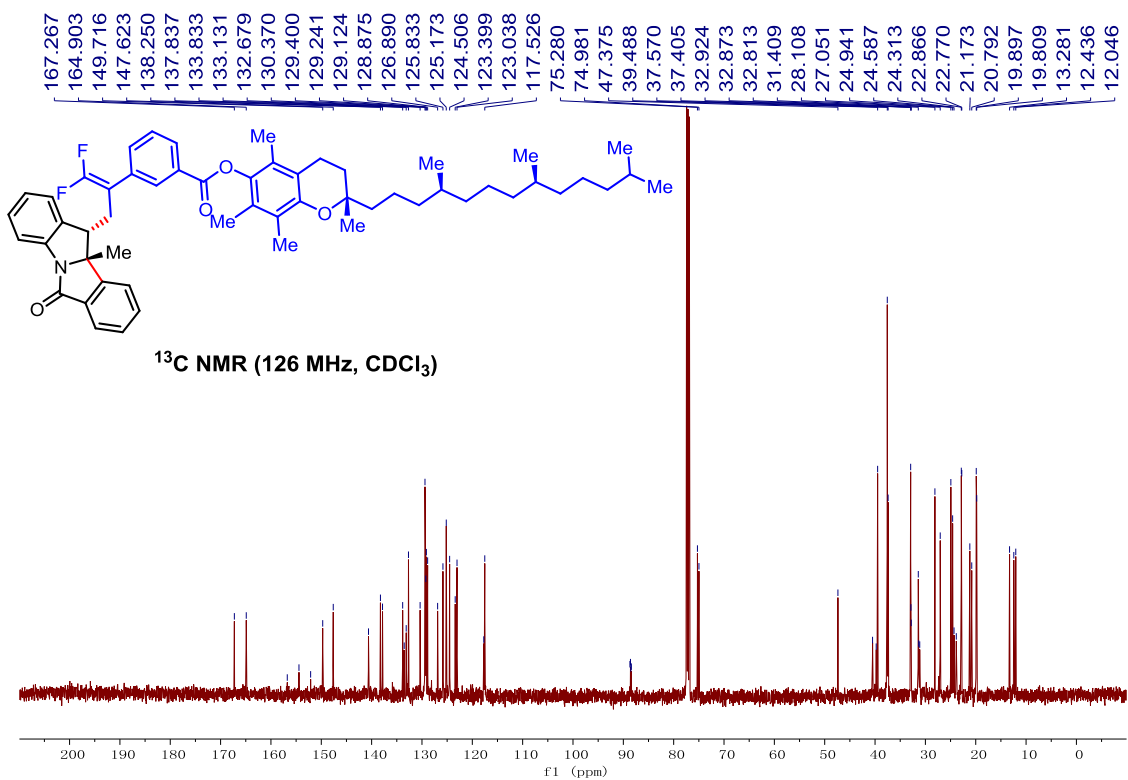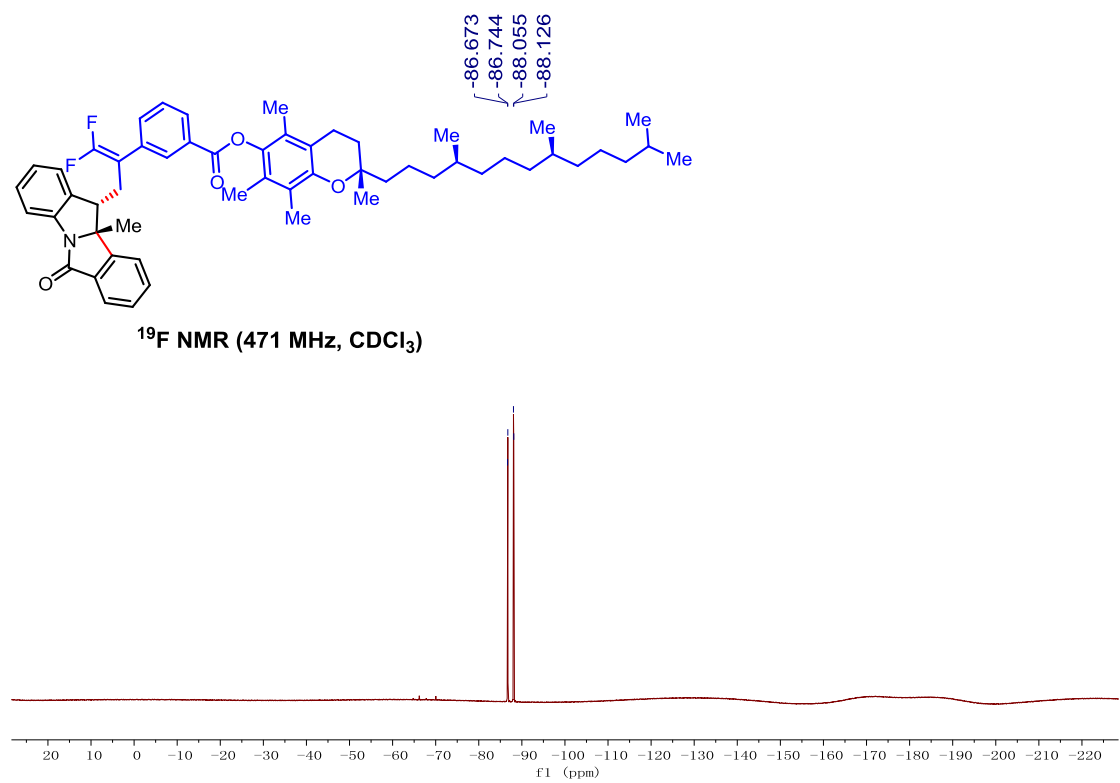

**(E)-3,7-Dimethylocta-2,6-dien-1-yl 3-(1,1-difluoro-3-((10bR,11S)-10b-methyl-6-oxo-10b,11-dihydro-6H-isoindolo[2,1-a]indol-11-yl)prop-1-en-2-yl)benzoate, 45**

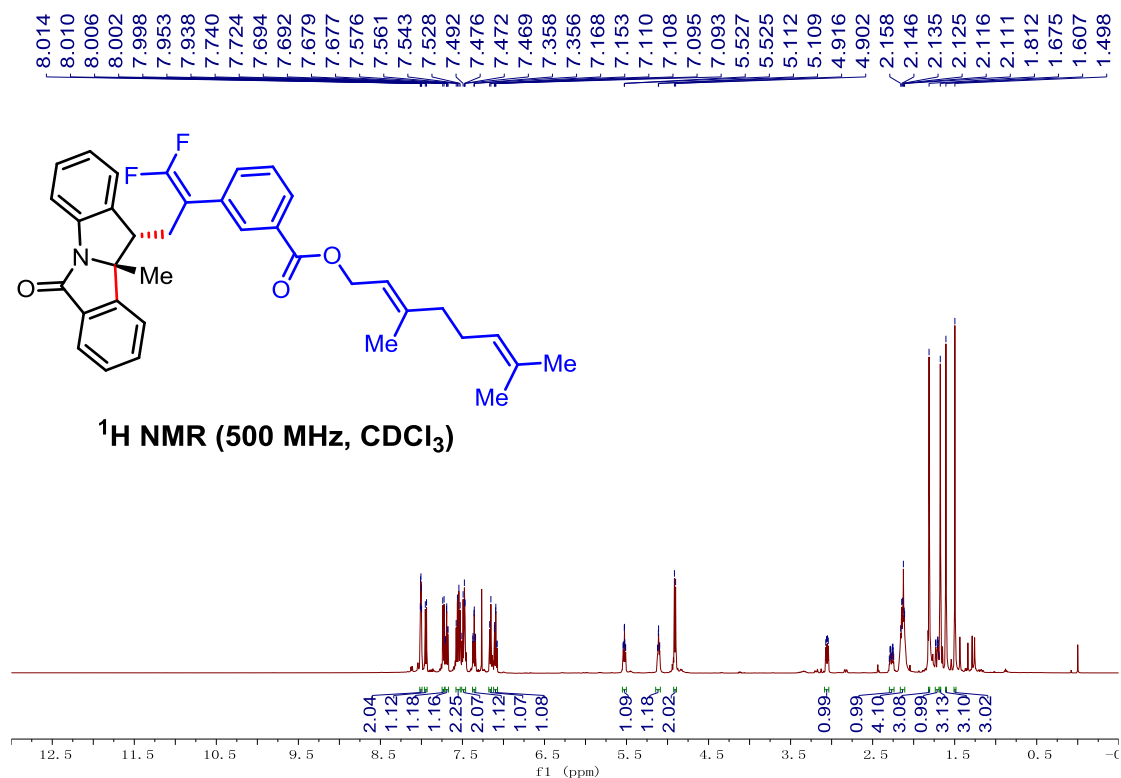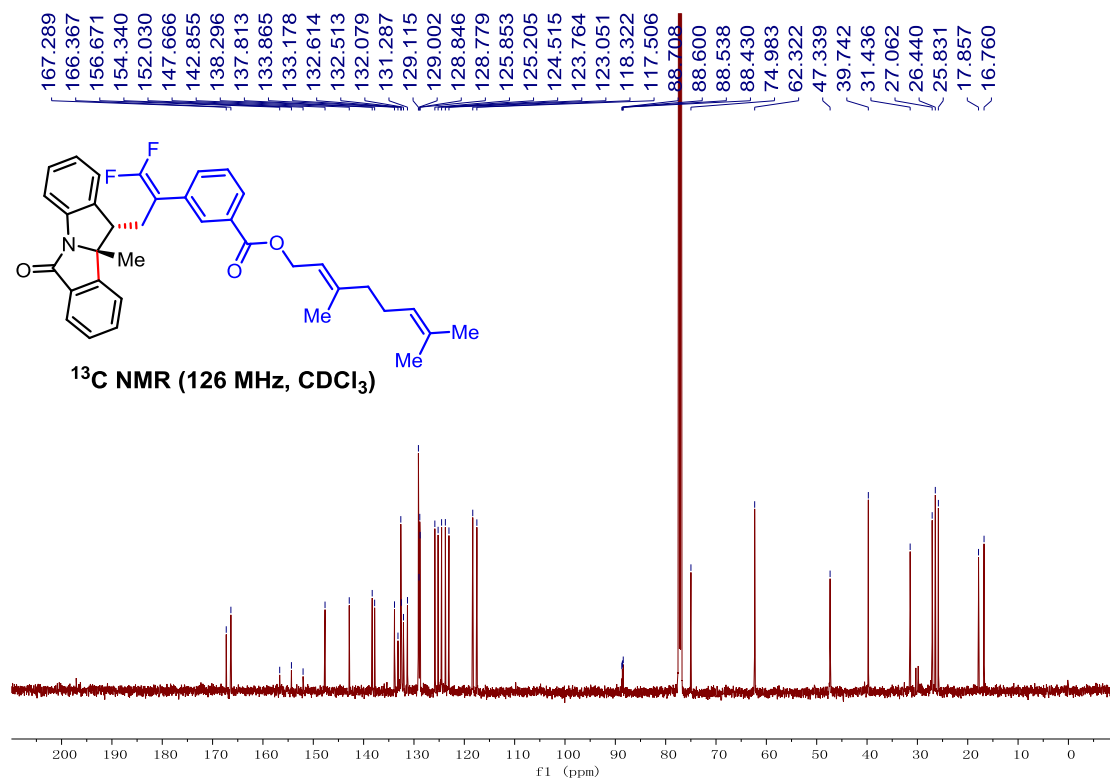

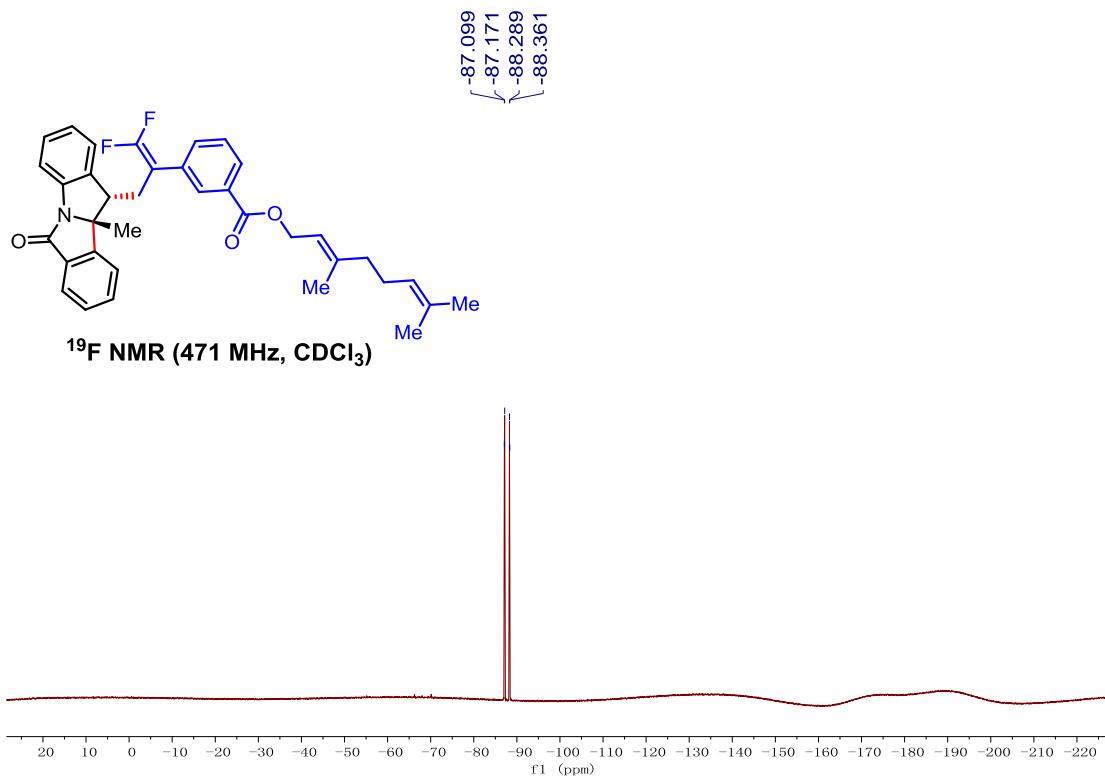

***N*-(3-(1,1-Difluoro-3-((10*b**R*,11*S*)-10*b*-methyl-6-oxo-10*b*,11-dihydro-6*H*-isoindolo[2,1-*a*]indol-11-yl)prop-1-en-2-yl)phenyl)-5-(2,5-dimethylphenoxy)-2,2-dimethylpentanamide, 46**

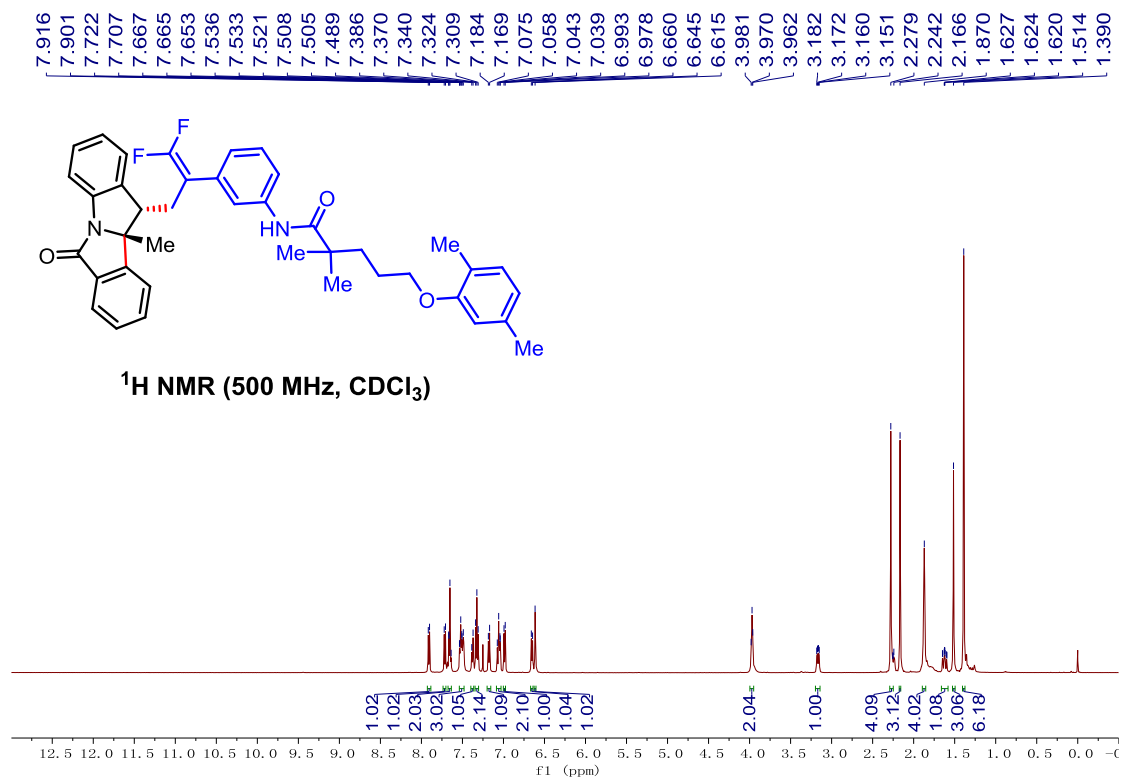

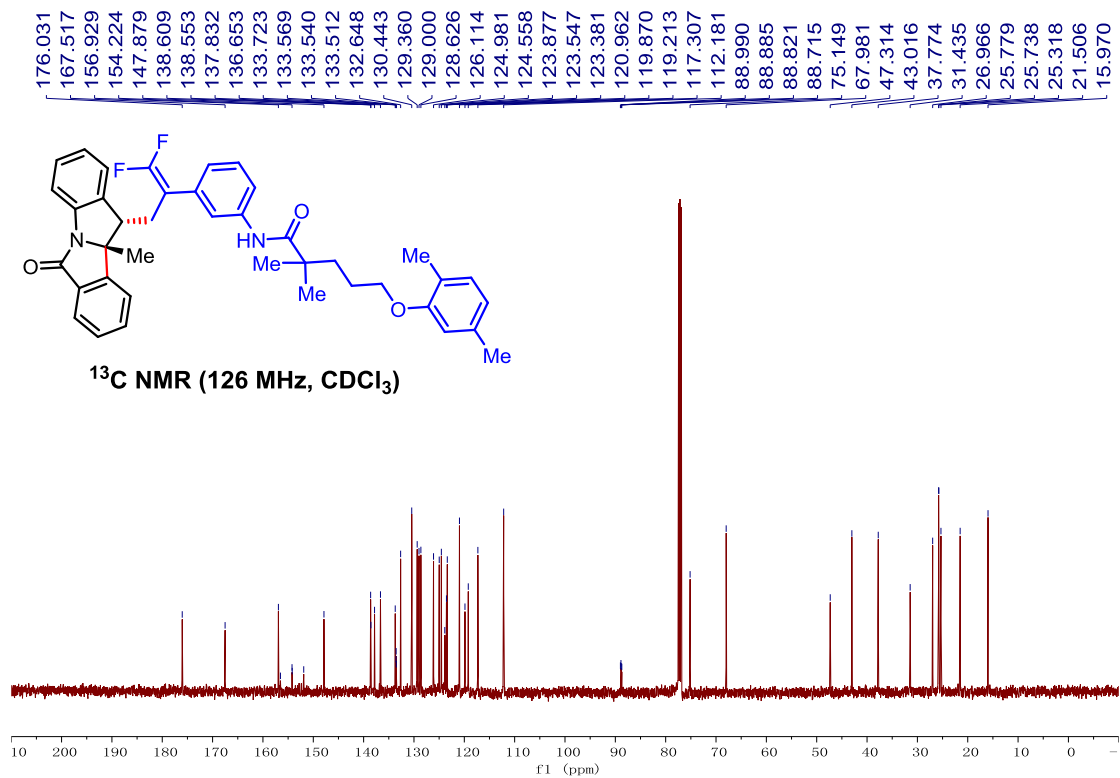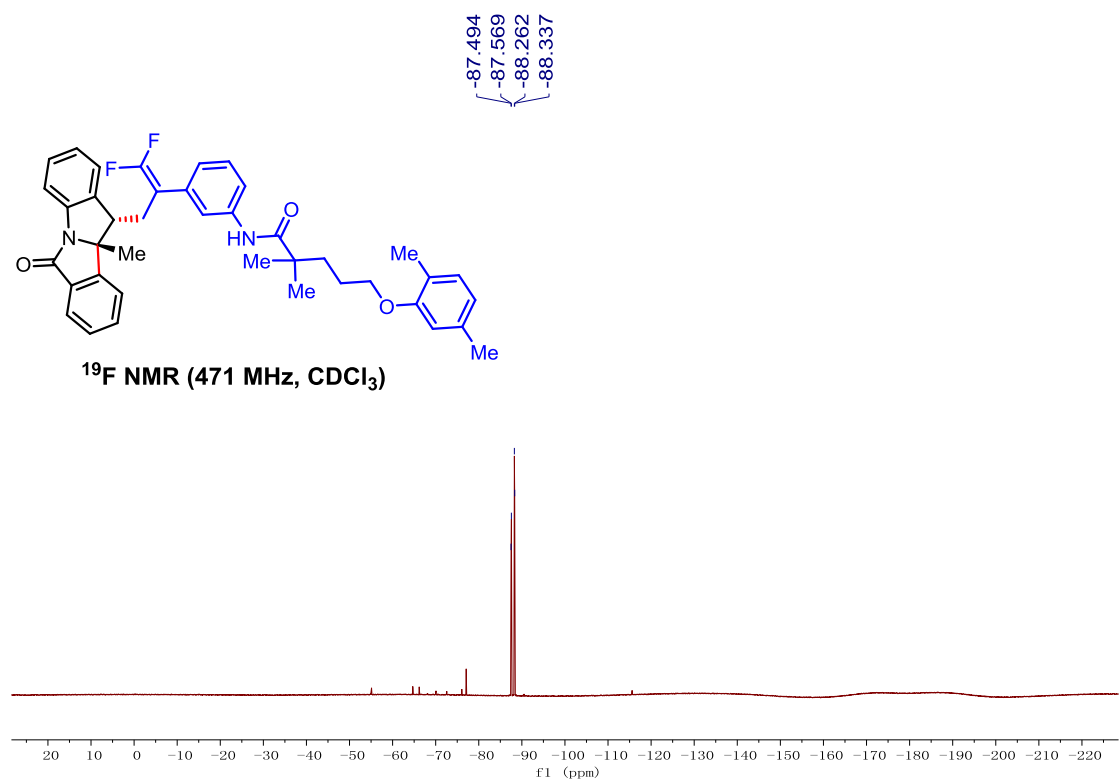

***N*-(3-(1,1-Difluoro-3-((10*bR*,11*S*)-10*b*-methyl-6-oxo-10*b*,11-dihydro-6*H*-isoindolo[2,1-*a*]indol-11-yl)prop-1-en-2-yl)phenyl)-2-(11-oxo-6,11-dihydrodibenzo[*b,e*]oxepin-2-yl)acetamide, 47**

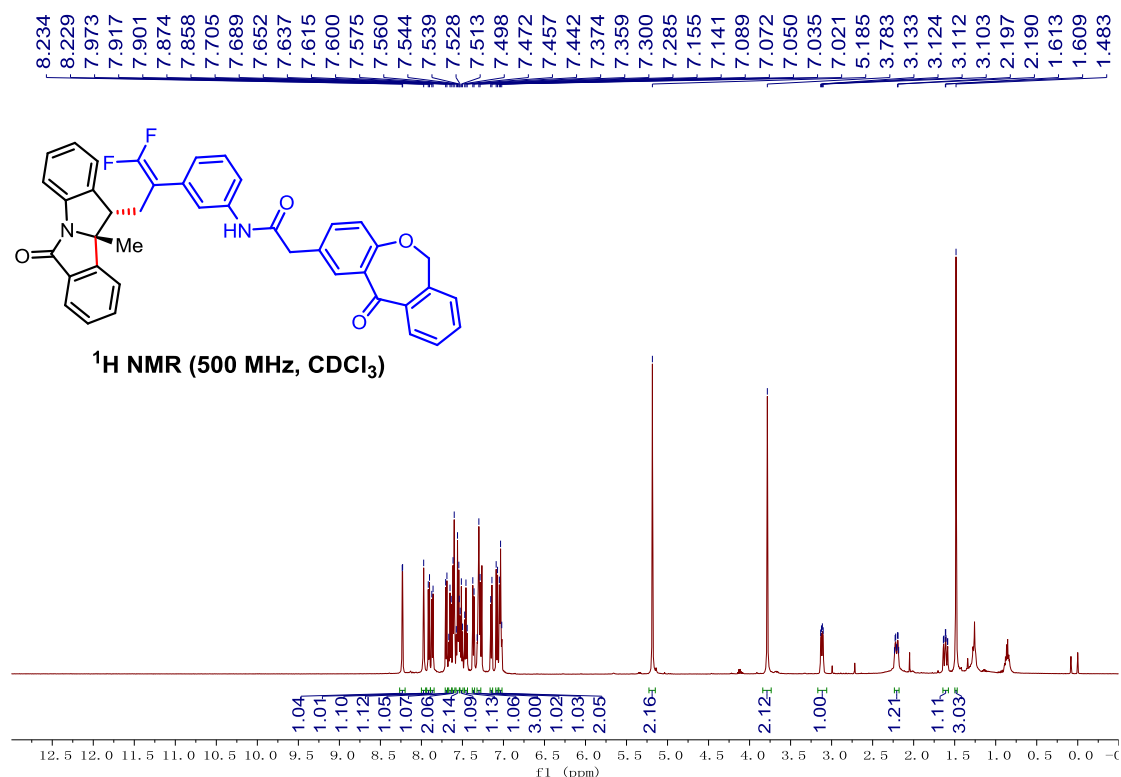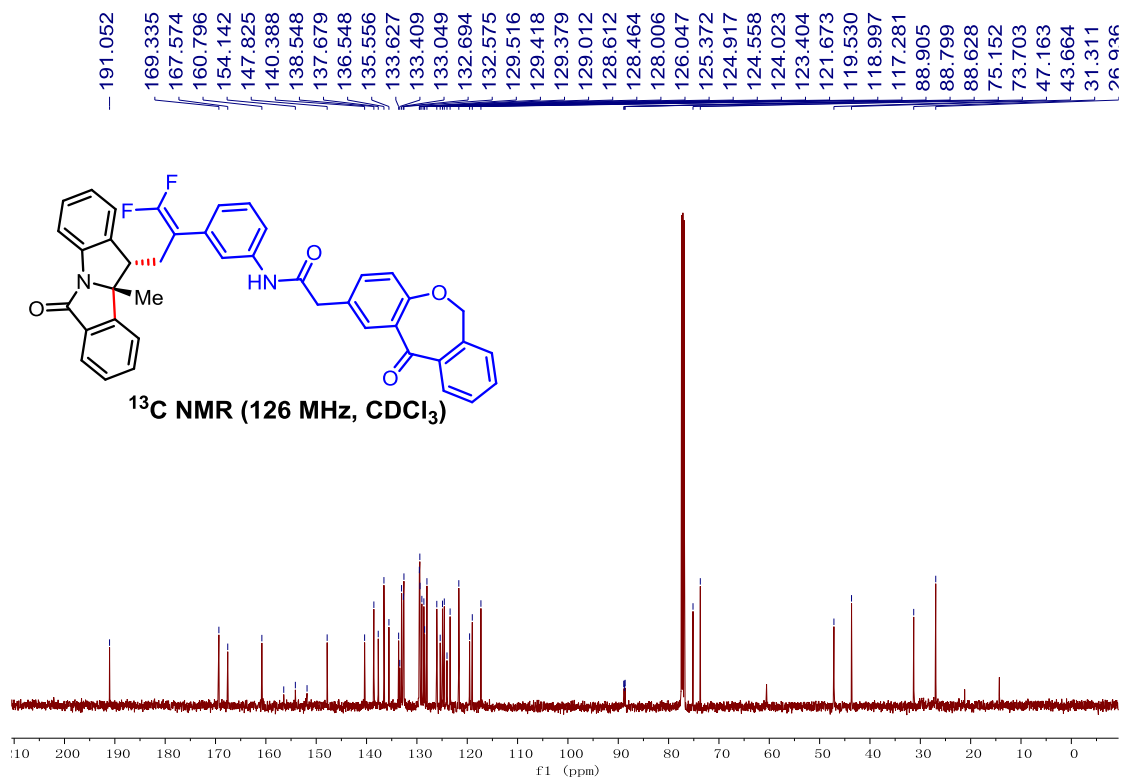



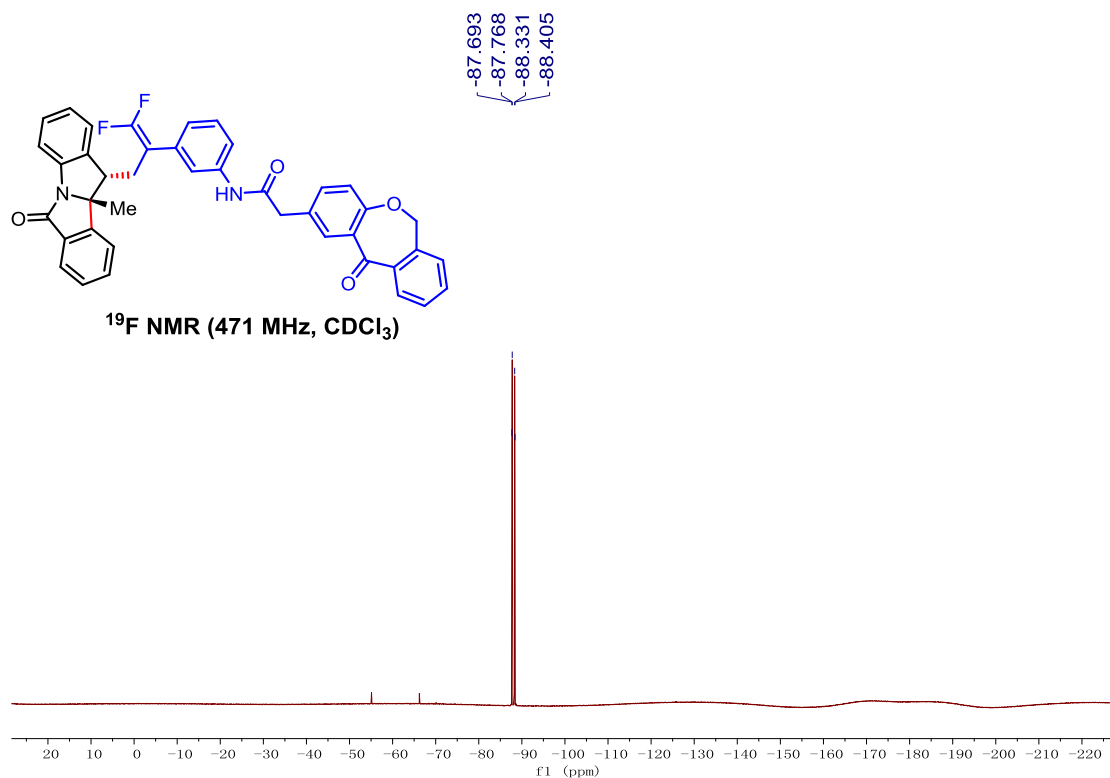

**2-(1-(4-Chlorobenzoyl)-5-methoxy-2-methyl-1*H*-indol-3-yl)-*N*-(3-(1,1-difluoro-3-((10*bR*,11*S*)-10*b*-methyl-6-oxo-10*b*,11-dihydro-6*H*-isoindolo[2,1-*a*]indol-11-yl)prop-1-en-2-yl)phenyl)acetamide, 48**

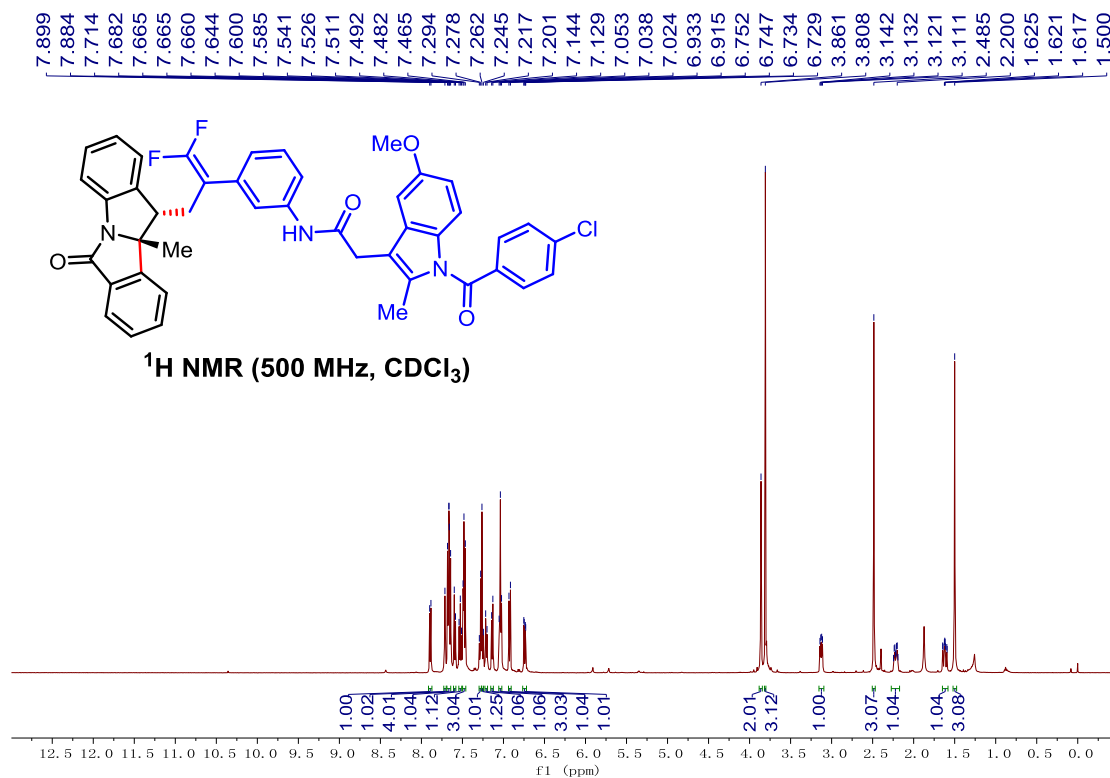

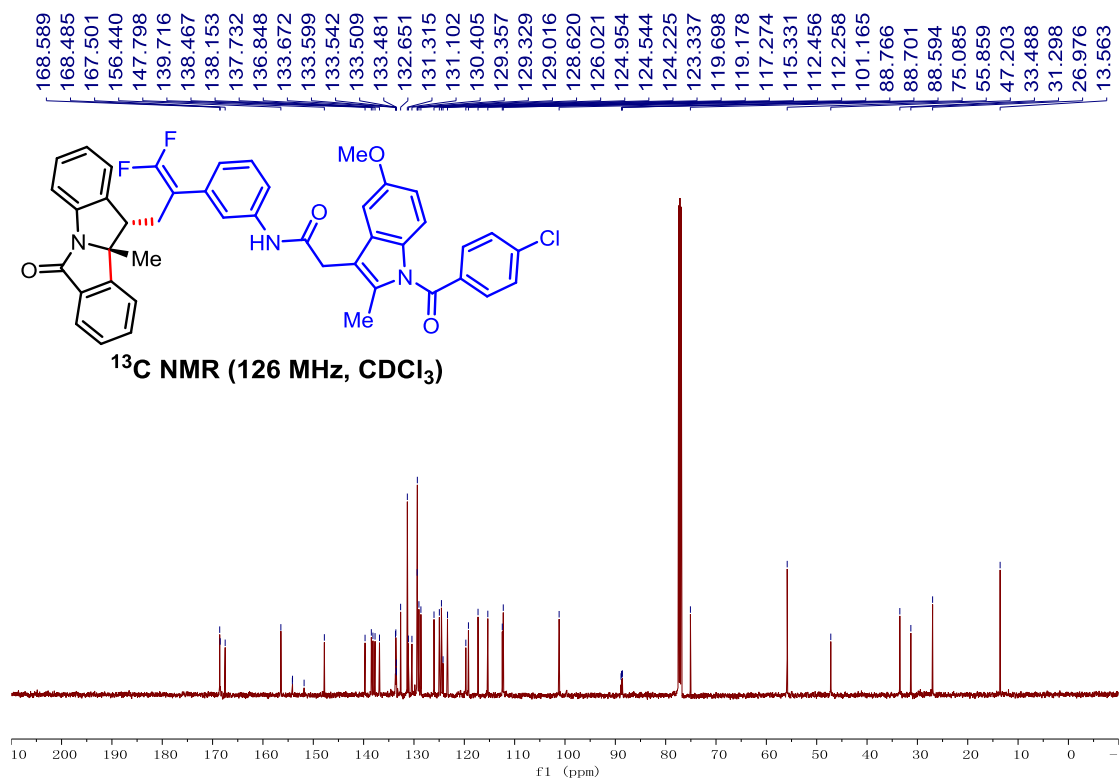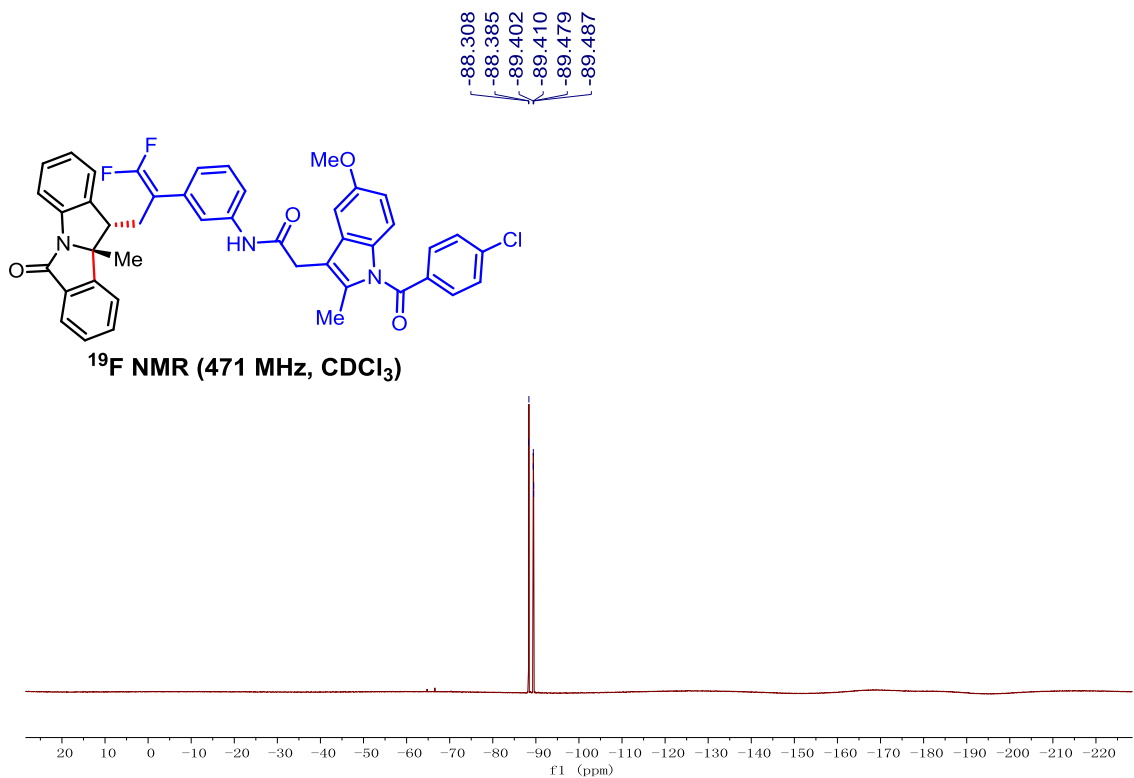

**(10bR,11S)-11-(3,3-Difluoro-2-((8R,9S,13S,14S)-13-methyl-17-oxo-**

**7,8,9,11,12,13,14,15,16,17-decahydro-6H-cyclopenta[*a*]phenanthren-3-yl)allyl)-  
10b-methyl-10b,11-dihydro-6H-isoindolo[2,1-*a*]indol-6-one, 49**

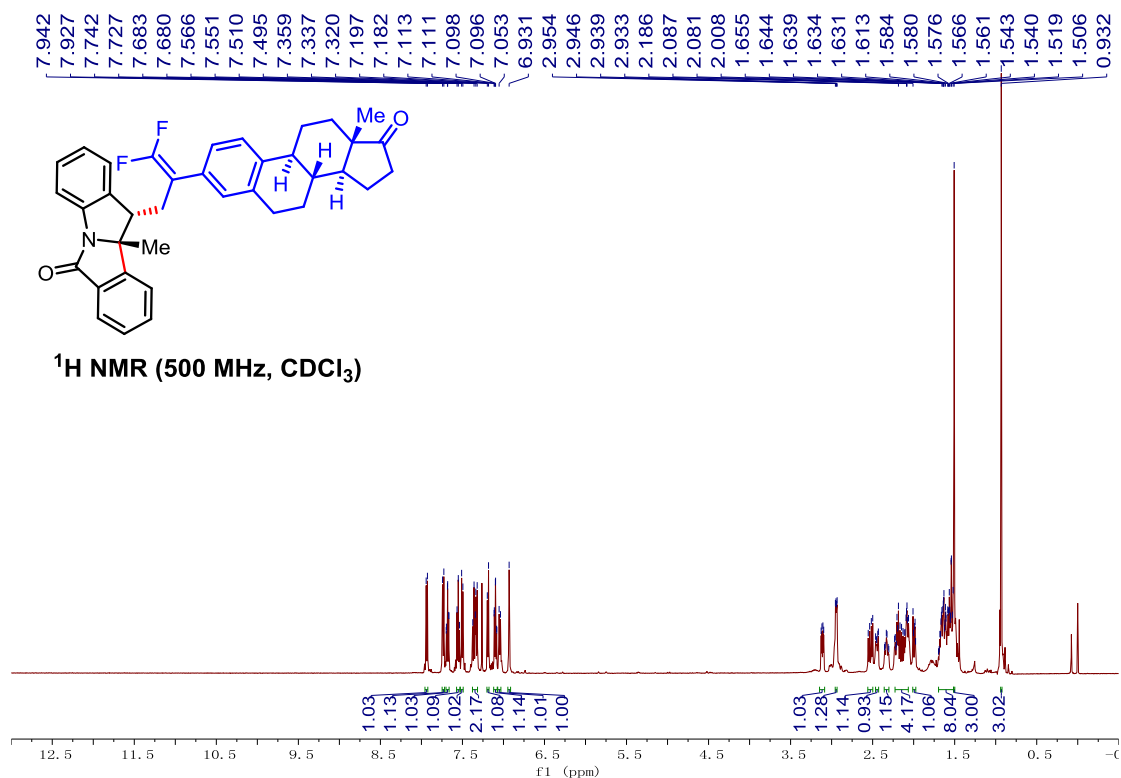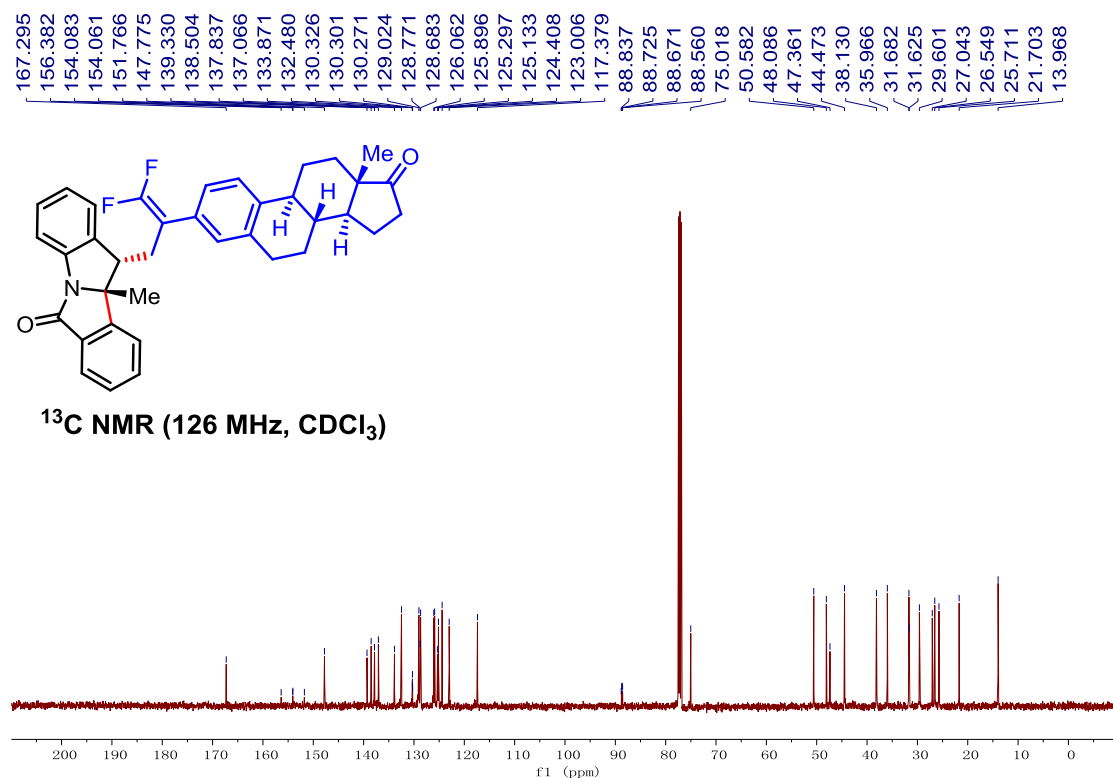

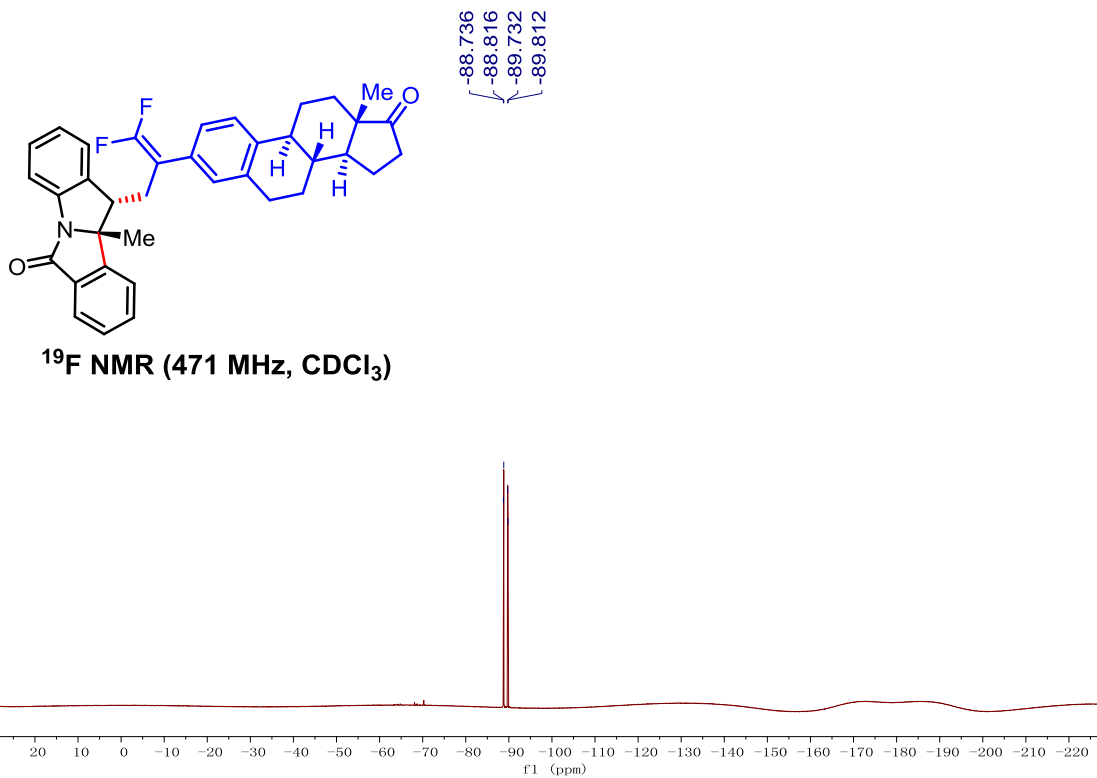

**2-Fluoro-4-((10*b*R,11*S*)-10*b*-methyl-6-oxo-10*b*,11-dihydro-6*H*-isoindolo[2,1-*a*]indol-11-yl)-3-(*p*-tolyl)but-2-enitrile, 50**

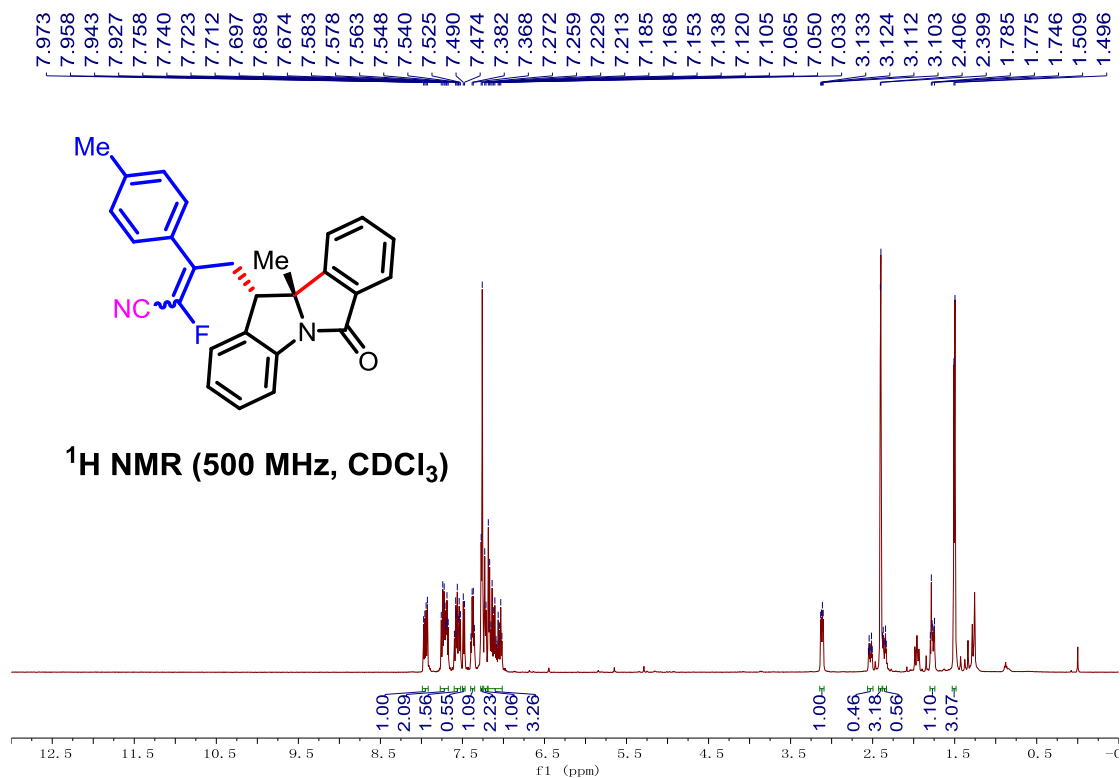

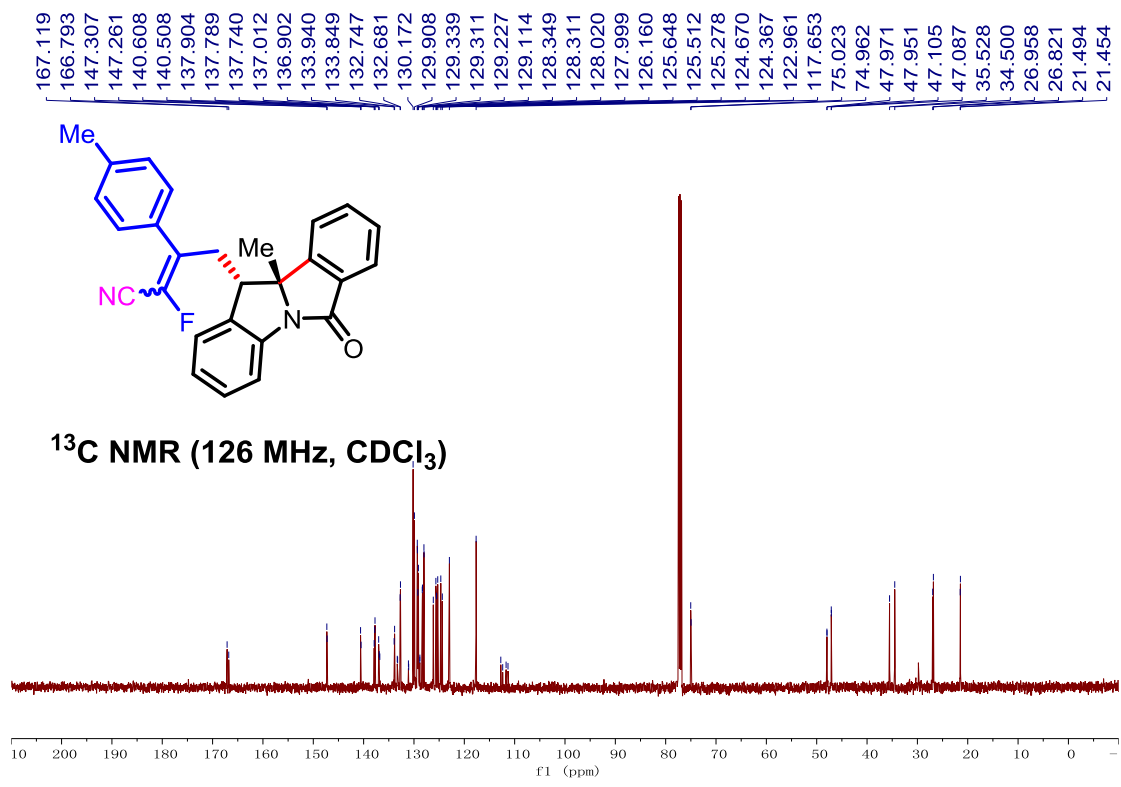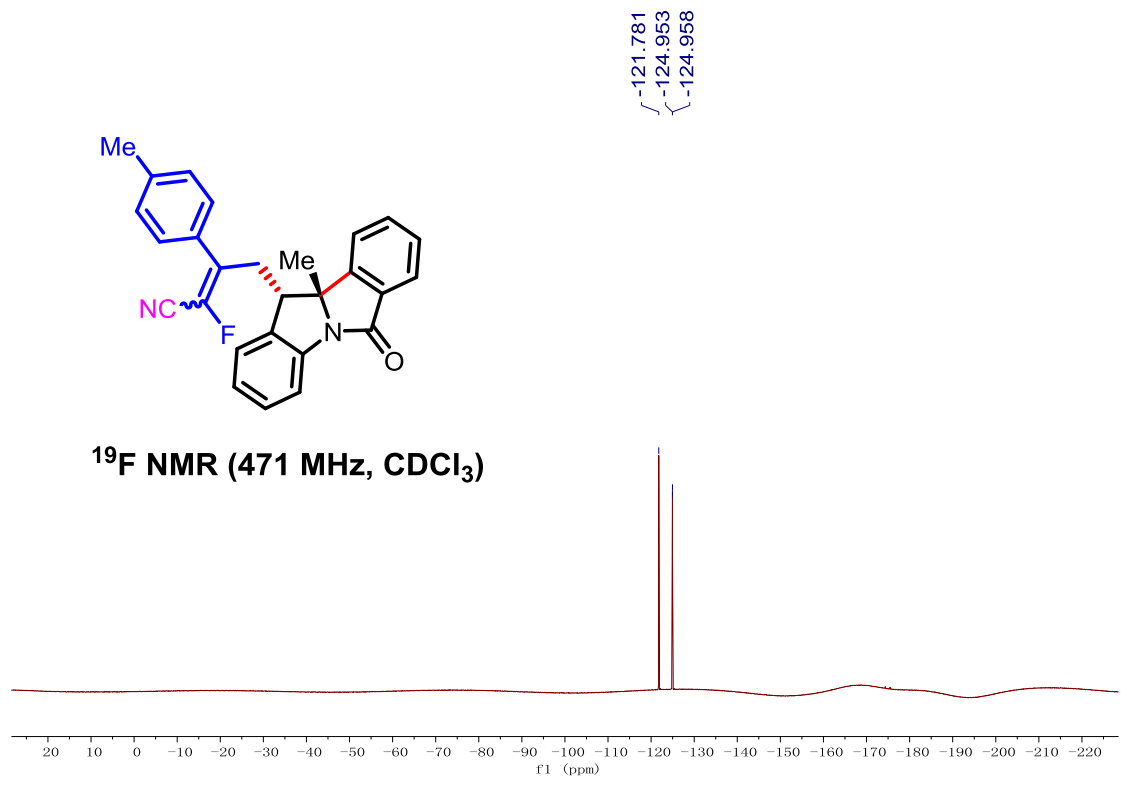

**(10*bR*,11*S*)-11-(3-Fluoro-3-(1*H*-indol-1-yl)-2-(*p*-tolyl)allyl)-10*b*-methyl-10*b*,11-dihydro-6*H*-isoindolo[2,1-*a*]indol-6-one, 51**

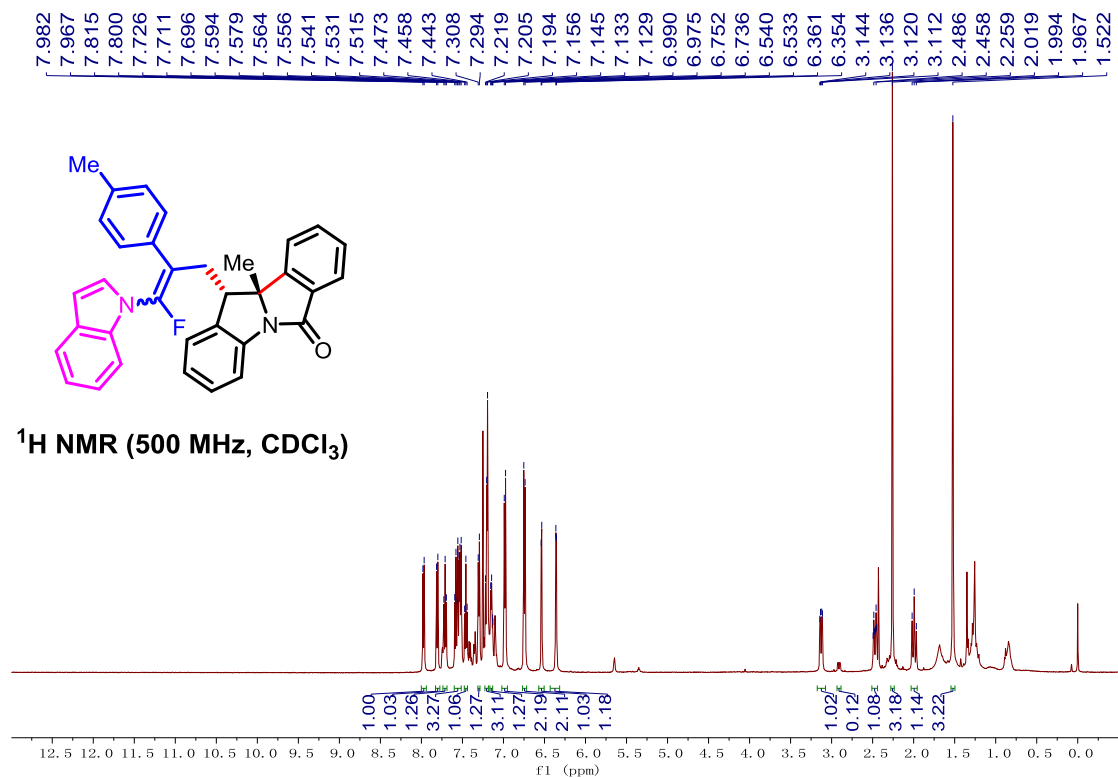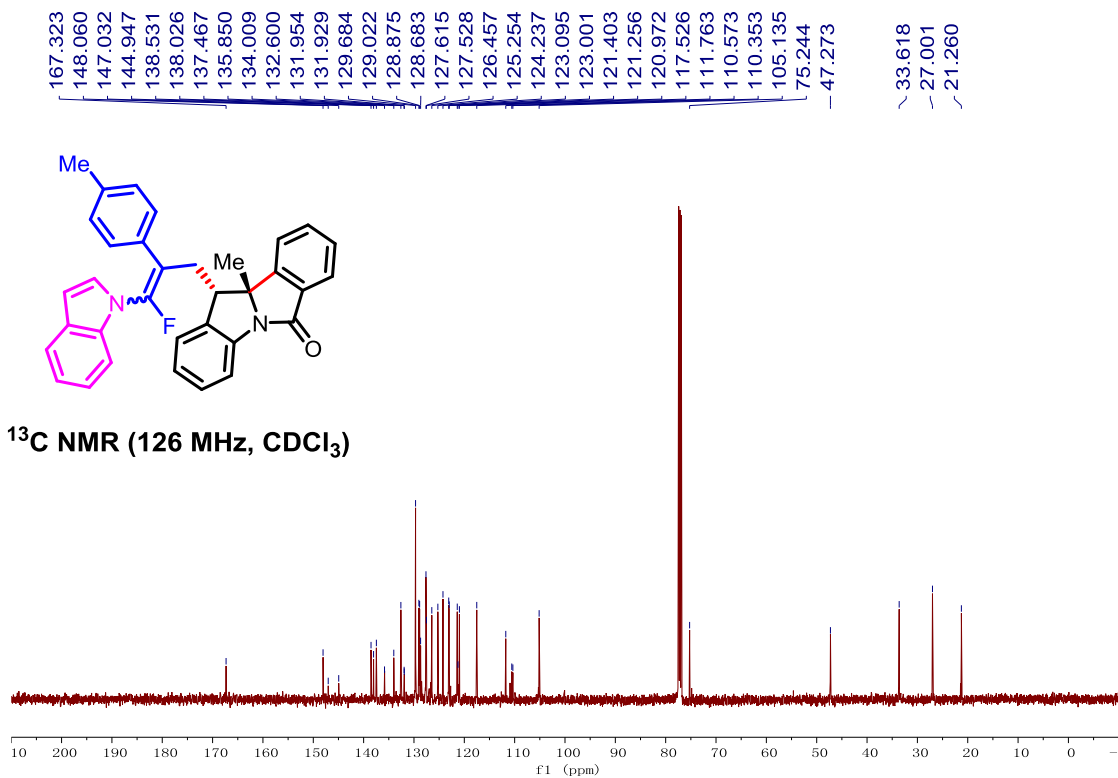

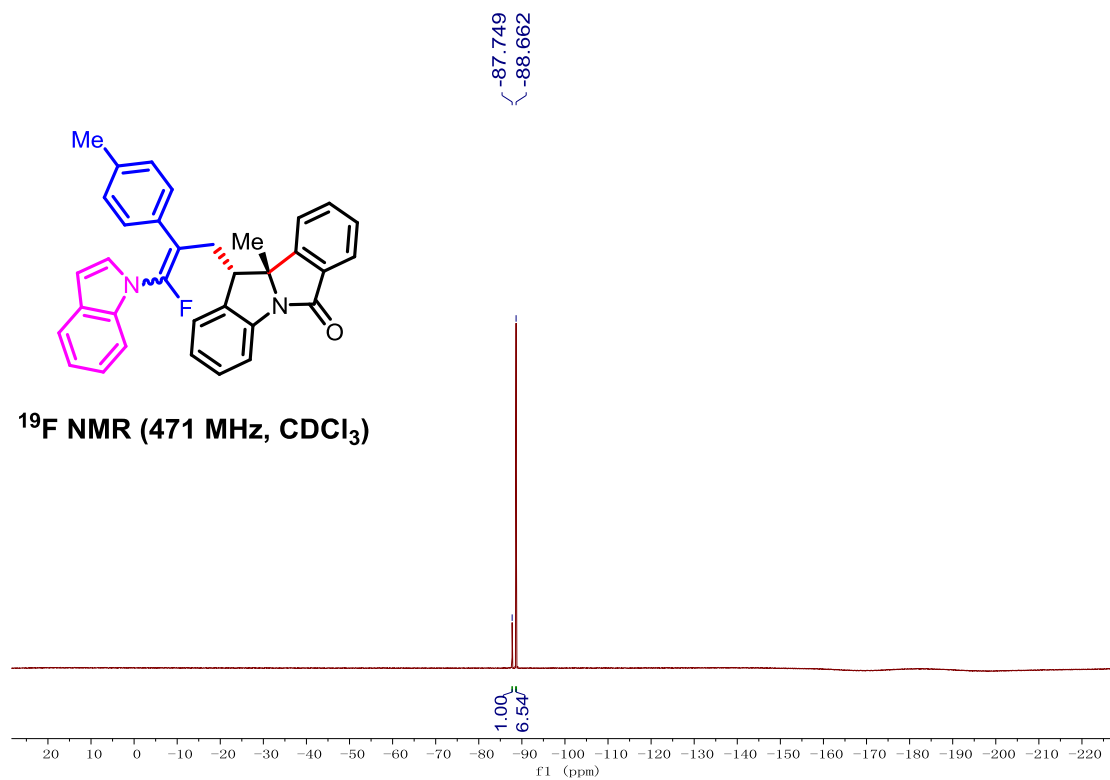

**(10bR,11S)-11-((E)-3-Fluoro-3-(1H-imidazol-1-yl)-2-(p-tolyl)allyl)-10b-methyl-10b,11-dihydro-6H-isoindolo[2,1-a]indol-6-one, 52**

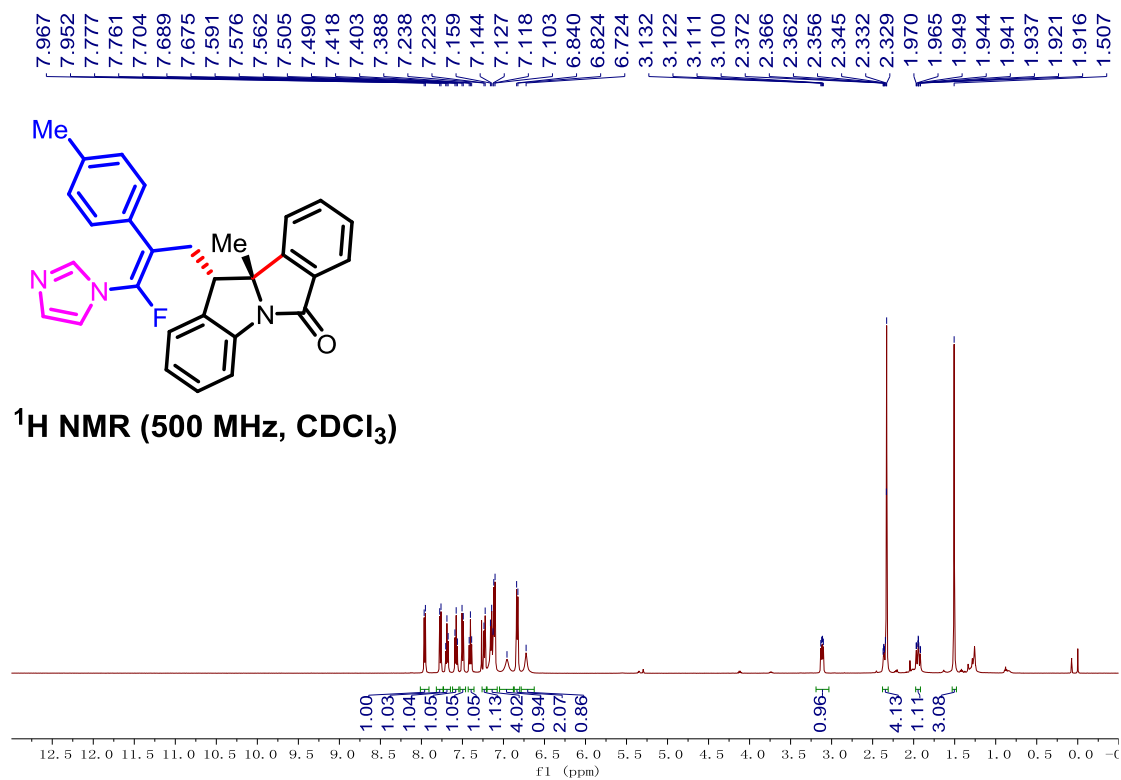

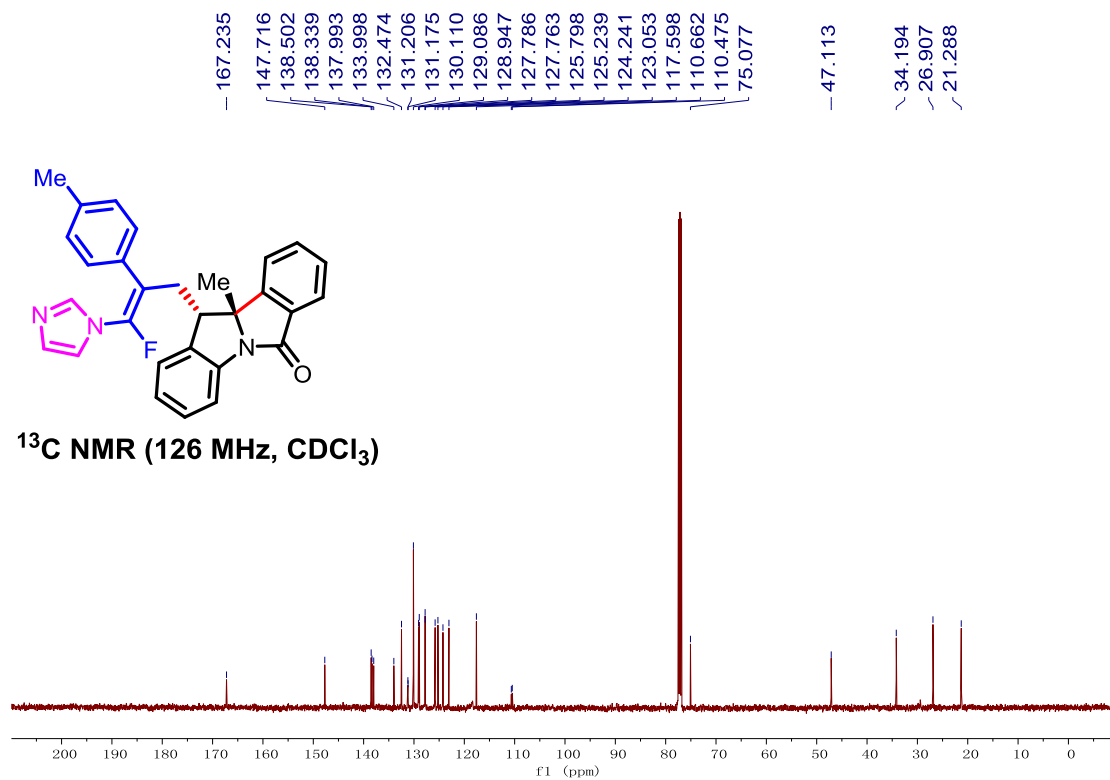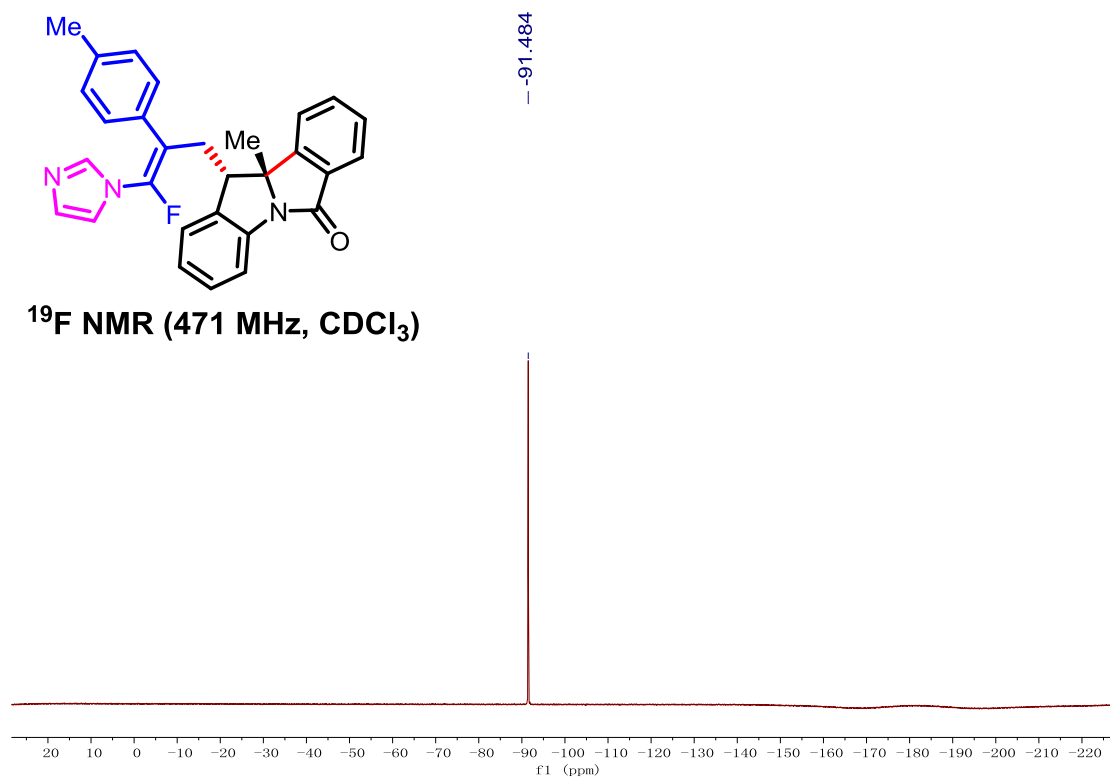



**(10*b*R,11*S*)-11-(3,3-Difluoro-2-(*p*-tolyl)propyl)-10*b*-methyl-10*b*,11-dihydro-6*H*-isoindolo[2,1-*a*]indol-6-one, 53**

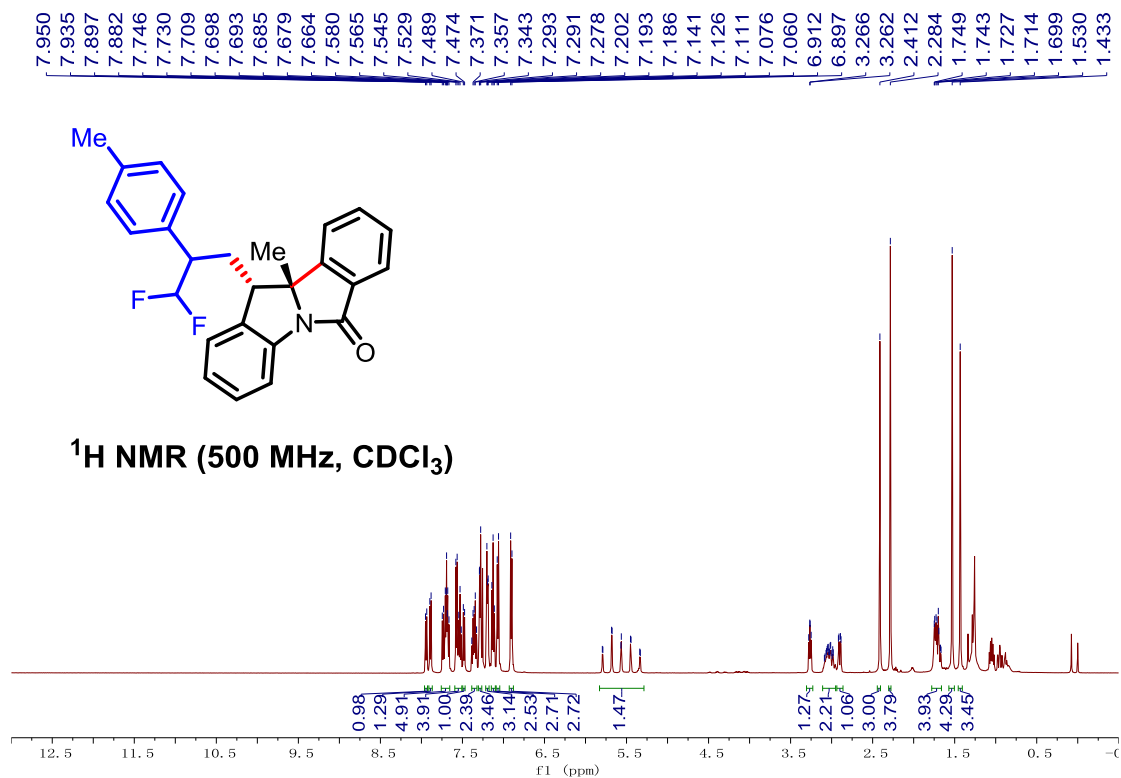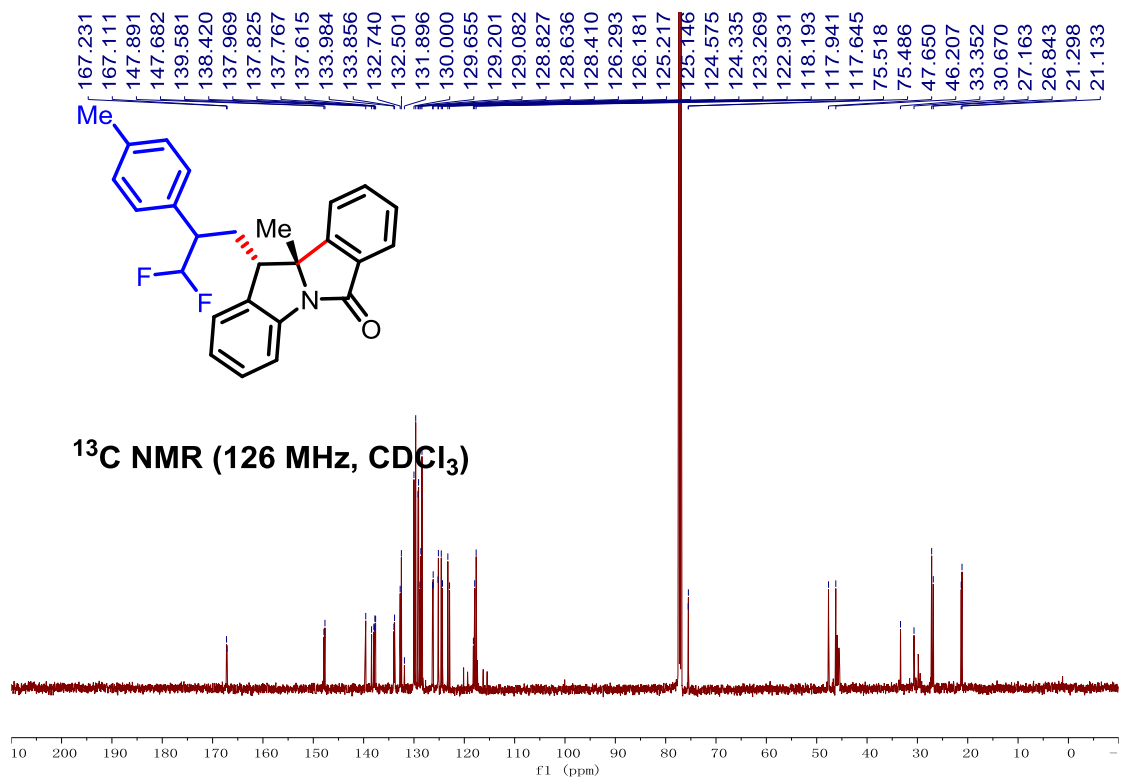

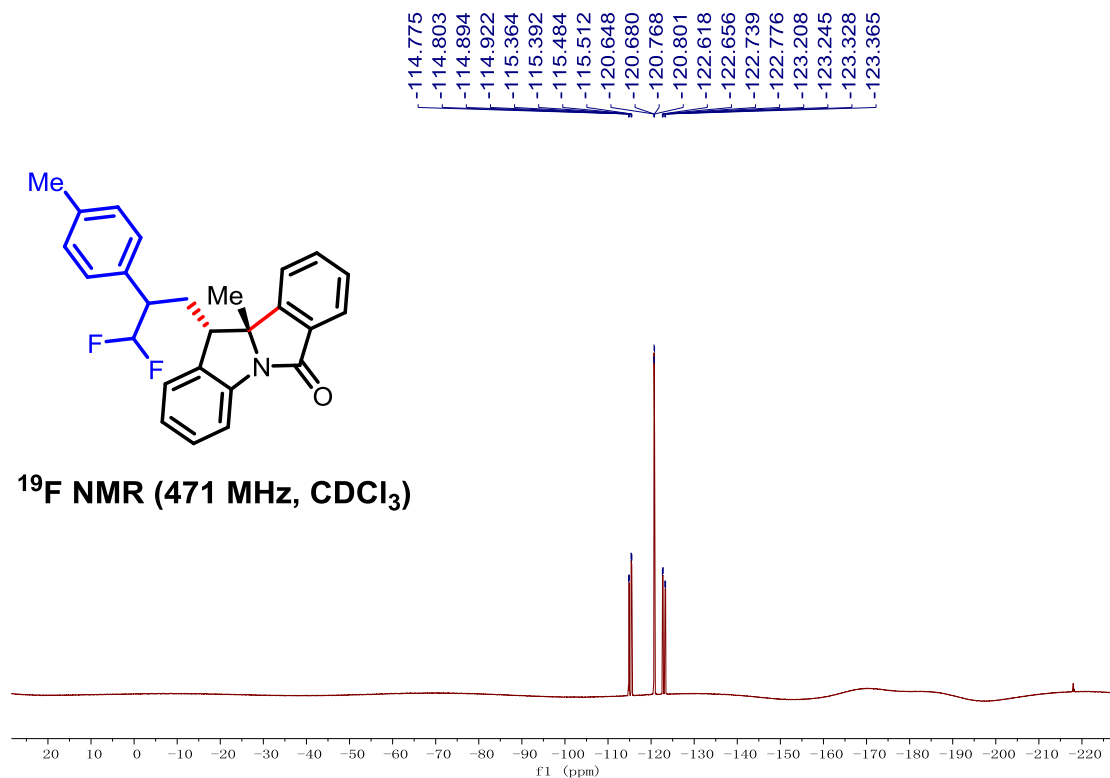

**(10bR,11S)-11-(3,3-Difluoro-2-(*p*-tolyl)allyl)-10b-methyl-10b,11-dihydro-6H-isoindolo[2,1-*a*]indole, 54**

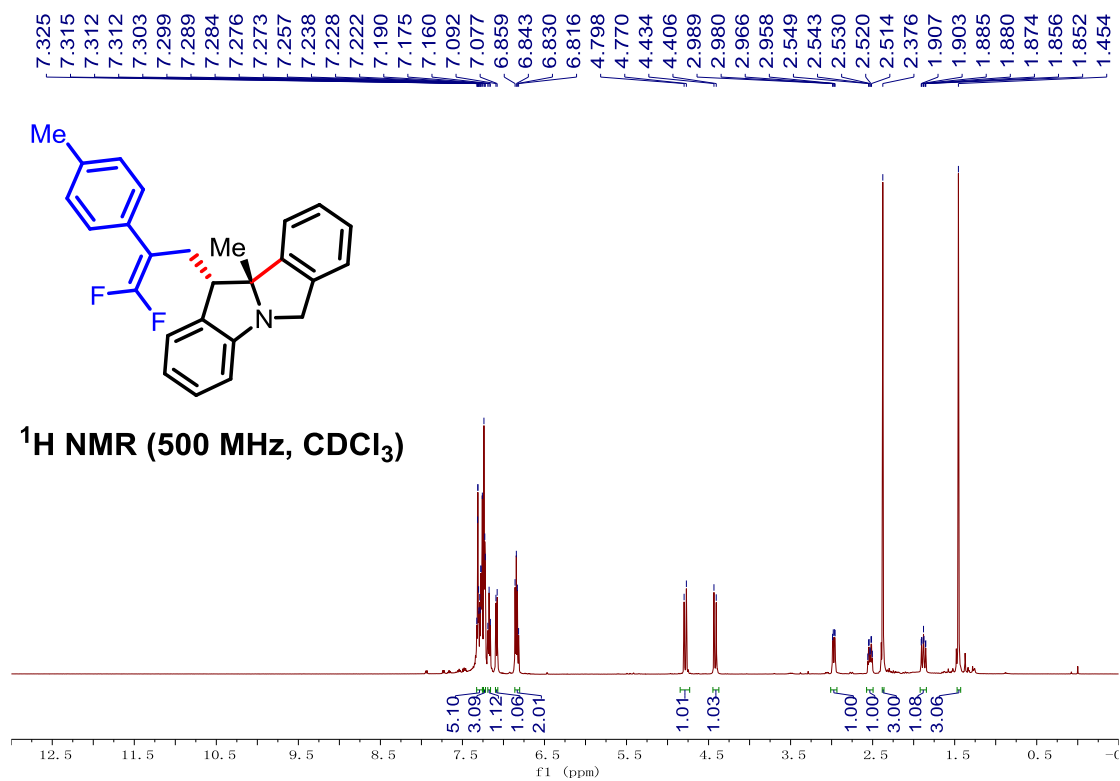

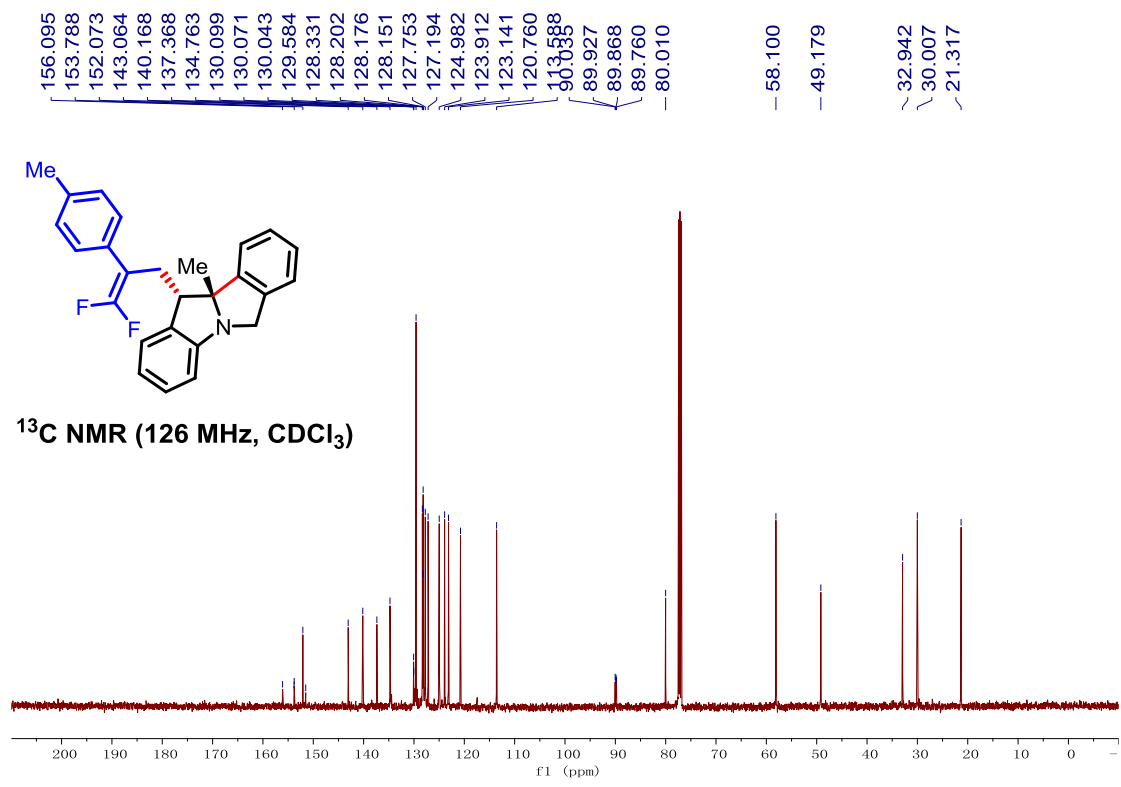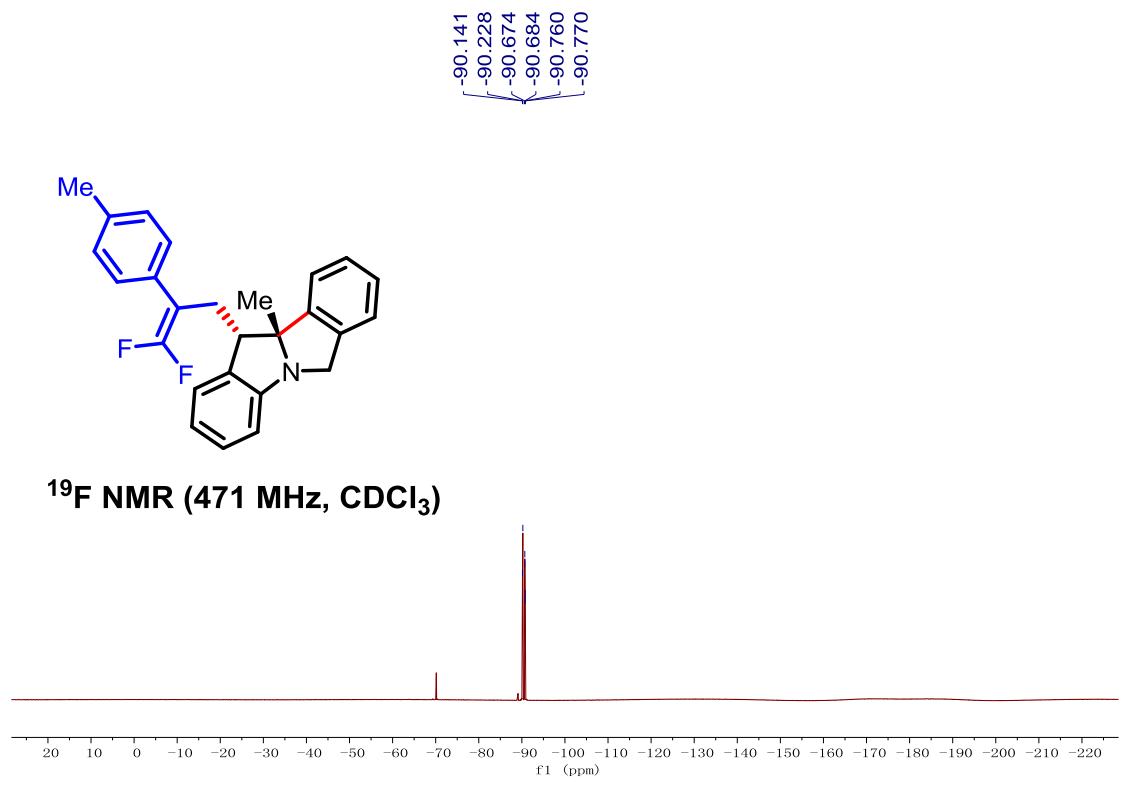

Supplement: d3qo01460f1.pdf [file d3qo01460f1.pdf]
